# Supplementary material
Source: Research Square preprint supplement (doi:10.21203/rs.3.rs-8905247/v1)
Supplement: Supplementary file 1 [file aee75c21dcd0d067825e3bb9.xlsx]

## Sheet: Merged Resistance Table
Peptide Marker	Classification	Confers Resistance To	Confers-Resistance-To ARO	Phenotype ARO	Gene ARO	Gene Annotation Depth	2021-Akita_L001 (paired, trimmed pairs) Abundance	Normalized Abundance in RPKM (2021-Akita_L001 (paired, trimmed pairs))	2021-Hiroshima_L001 (paired, trimmed pairs) Abundance	Normalized Abundance in RPKM (2021-Hiroshima_L001 (paired, trimmed pairs))	2021-Hokkaido_L001 (paired, trimmed pairs) Abundance	Normalized Abundance in RPKM (2021-Hokkaido_L001 (paired, trimmed pairs))	2021-Kagoshima_L001 (paired, trimmed pairs) Abundance	Normalized Abundance in RPKM (2021-Kagoshima_L001 (paired, trimmed pairs))	2021-Miyagi_L001 (paired, trimmed pairs) Abundance	Normalized Abundance in RPKM (2021-Miyagi_L001 (paired, trimmed pairs))	2021-Nagasaki_L001 (paired, trimmed pairs) Abundance	Normalized Abundance in RPKM (2021-Nagasaki_L001 (paired, trimmed pairs))	2021-Okinawa_L001 (paired, trimmed pairs) Abundance	Normalized Abundance in RPKM (2021-Okinawa_L001 (paired, trimmed pairs))	2021-Saitama_L001 (paired, trimmed pairs) Abundance	Normalized Abundance in RPKM (2021-Saitama_L001 (paired, trimmed pairs))	2021-Shiga_L001 (paired, trimmed pairs) Abundance	Normalized Abundance in RPKM (2021-Shiga_L001 (paired, trimmed pairs))	2021-Tokushima_L001 (paired, trimmed pairs) Abundance	Normalized Abundance in RPKM (2021-Tokushima_L001 (paired, trimmed pairs))	2021-Tottori_L001 (paired, trimmed pairs) Abundance	Normalized Abundance in RPKM (2021-Tottori_L001 (paired, trimmed pairs))	2021-Wakayama_L001 (paired, trimmed pairs) Abundance	Normalized Abundance in RPKM (2021-Wakayama_L001 (paired, trimmed pairs))	2022-Akita_L001 (paired, trimmed pairs) Abundance	Normalized Abundance in RPKM (2022-Akita_L001 (paired, trimmed pairs))	2022-Hiroshima_L001 (paired, trimmed pairs) Abundance	Normalized Abundance in RPKM (2022-Hiroshima_L001 (paired, trimmed pairs))	2022-Hokkaido_L001 (paired, trimmed pairs) Abundance	Normalized Abundance in RPKM (2022-Hokkaido_L001 (paired, trimmed pairs))	2022-Kagoshima_L001 (paired, trimmed pairs) Abundance	Normalized Abundance in RPKM (2022-Kagoshima_L001 (paired, trimmed pairs))	2022-Miyagi_L001 (paired, trimmed pairs) Abundance	Normalized Abundance in RPKM (2022-Miyagi_L001 (paired, trimmed pairs))	2022-Nagasaki_L001 (paired, trimmed pairs) Abundance	Normalized Abundance in RPKM (2022-Nagasaki_L001 (paired, trimmed pairs))	2022-Okinawa_L001 (paired, trimmed pairs) Abundance	Normalized Abundance in RPKM (2022-Okinawa_L001 (paired, trimmed pairs))	2022-Saitama_L001 (paired, trimmed pairs) Abundance	Normalized Abundance in RPKM (2022-Saitama_L001 (paired, trimmed pairs))	2022-Shiga_L001 (paired, trimmed pairs) Abundance	Normalized Abundance in RPKM (2022-Shiga_L001 (paired, trimmed pairs))	2022-Tokushima_L001 (paired, trimmed pairs) Abundance
CARD_100703_TM_#01	antibiotic inactivation enzyme; AAC(2')-Ib	amikacin, gentamicin C, tobramycin, arbekacin, gentamicin B, aminoglycoside antibiotic	0000013, 0000014, 0000052, 3000654, 3000655, 0000016	3000557	3002524	5	0	0	0	0	0	0	1	0.0490961	1	0.075583	0	0	0	0	0	0	0	0	9	0.712146	0	0	0	0	0	0	0	0	1	0.134747	0	0	0	0	0	0	0	0	5	0.278634	0	0	0
RESF_300099_TM_#01	antibiotic inactivation enzyme; AAC(2')-Ic	amikacin, gentamicin C, tobramycin, arbekacin, gentamicin B, aminoglycoside antibiotic	0000013, 0000014, 0000052, 3000654, 3000655, 0000016	3000557	3002525	5	4	0.122891	0	0	0	0	0	0	0	0	0	0	0	0	0	0	0	0	0	0	0	0	0	0	0	0	0	0	0	0	0	0	0	0	0	0	0	0	0	0	0	0	0
CARD_102137_TM_#01	antibiotic inactivation enzyme; AAC(2')-IIa	kasugamycin, aminoglycoside antibiotic	3001296, 0000016	3000557	3004628	5	866	17.079	0	0	12	1.5539	109	3.68214	11	0.573038	37	1.71404	0	0	2	0.0658102	83	3.31849	0	0	239	91.3492	0	0	660	30.9882	266	55.4907	0	0	39	6.8497	18	2.07539	37	19.3816	0	0	0	0	2494	82.6845	2
RESF_300103_TM_#06	antibiotic inactivation enzyme; AAC(3)-Ia	gentamicin C, sisomicin, gentamicin B, plazomicin, aminoglycoside antibiotic	0000014, 0000035, 3000655, 3003675, 0000016	3000557	3002528	5	0	0	0	0	0	0	0	0	0	0	0	0	0	0	0	0	0	0	0	0	0	0	0	0	0	0	0	0	0	0	0	0	64	74.6871	0	0	0	0	0	0	0	0	0
RESF_300103_TM_#07	antibiotic inactivation enzyme; AAC(3)-Ia	gentamicin C, sisomicin, gentamicin B, plazomicin, aminoglycoside antibiotic	0000014, 0000035, 3000655, 3003675, 0000016	3000557	3002528	5	0	0	0	0	0	0	0	0	0	0	0	0	0	0	0	0	0	0	0	0	0	0	0	0	0	0	0	0	0	0	0	0	34	61.6953	0	0	0	0	0	0	0	0	0
RESF_300112_TM_#03	antibiotic inactivation enzyme; AAC(3)-IIa	gentamicin C, tobramycin, gentamicin B, plazomicin, aminoglycoside antibiotic	0000014, 0000052, 3000655, 3003675, 0000016	3000557	3002533	5	0	0	0	0	0	0	0	0	0	0	0	0	0	0	0	0	0	0	0	0	0	0	0	0	0	0	6	22.5882	0	0	62	376.434	0	0	0	0	12	6.10771	0	0	0	0	0
RESF_300112_TM_#02	antibiotic inactivation enzyme; AAC(3)-IIa	gentamicin C, tobramycin, gentamicin B, plazomicin, aminoglycoside antibiotic	0000014, 0000052, 3000655, 3003675, 0000016	3000557	3002533	5	0	0	0	0	0	0	0	0	0	0	0	0	0	0	0	0	0	0	0	0	0	0	0	0	0	0	0	0	0	0	104	456.832	0	0	0	0	7	1.74265	0	0	0	0	0
RESF_300112_TM_#05	antibiotic inactivation enzyme; AAC(3)-IIa	gentamicin C, tobramycin, gentamicin B, plazomicin, aminoglycoside antibiotic	0000014, 0000052, 3000655, 3003675, 0000016	3000557	3002533	5	0	0	0	0	0	0	0	0	0	0	0	0	0	0	0	0	0	0	0	0	0	0	0	0	0	0	0	0	0	0	132	238.165	0	0	0	0	32	3.98855	0	0	0	0	0
RESF_300112_TM_#08	antibiotic inactivation enzyme; AAC(3)-IIa	gentamicin C, tobramycin, gentamicin B, plazomicin, aminoglycoside antibiotic	0000014, 0000052, 3000655, 3003675, 0000016	3000557	3002533	5	0	0	0	0	0	0	0	0	0	0	0	0	0	0	0	0	0	0	0	0	0	0	0	0	0	0	0	0	0	0	53	353.638	0	0	0	0	0	0	0	0	0	0	0
CARD_100869_TM_#01	antibiotic inactivation enzyme; AAC(3)-IIb	amikacin, gentamicin C, gentamicin B, aminoglycoside antibiotic	0000013, 0000014, 3000655, 0000016	3000557	3002534	5	0	0	0	0	0	0	0	0	0	0	0	0	20	1.02161	0	0	0	0	0	0	0	0	0	0	0	0	0	0	0	0	0	0	0	0	0	0	0	0	2	0.0753656	0	0	0
CARD_102692_TM_#01	antibiotic inactivation enzyme; AAC(3)-IIg	aminoglycoside antibiotic	16	3000557	3005085	5	0	0	0	0	0	0	28	0.896632	8	0.402209	0	0	76	3.87226	0	0	0	0	0	0	0	0	0	0	0	0	0	0	0	0	0	0	0	0	0	0	4	0.0489008	0	0	0	0	0
CARD_100042_TM_#07	antibiotic inactivation enzyme; AAC(3)-IIIc	aminoglycoside antibiotic	16	3000557	3002538	5	0	0	6	17.9433	13	12.482	8	2.23708	16	6.32585	3	1.0587	11	4.4781	0	0	0	0	0	0	0	0	0	0	2	0.710663	0	0	0	0	0	0	0	0	0	0	16	2.44405	11	3.20512	0	0	0
CARD_100042_TM_#05	antibiotic inactivation enzyme; AAC(3)-IIIc	aminoglycoside antibiotic	16	3000557	3002538	5	0	0	0	0	3	2.78444	2	0.487688	3	1.12619	0	0	0	0	0	0	0	0	1	0.392999	0	0	0	0	0	0	0	0	0	0	0	0	0	0	0	0	2	0.182563	4	1.12862	0	0	0
CARD_100042_TM_#09	antibiotic inactivation enzyme; AAC(3)-IIIc	aminoglycoside antibiotic	16	3000557	3002538	5	0	0	0	0	0	0	5	1.26126	0	0	0	0	0	0	0	0	0	0	0	0	0	0	0	0	0	0	0	0	0	0	0	0	0	0	0	0	0	0	2	0.606557	0	0	0
CARD_100042_TM_#08	antibiotic inactivation enzyme; AAC(3)-IIIc	aminoglycoside antibiotic	16	3000557	3002538	5	0	0	0	0	0	0	0	0	2	1.02381	0	0	13	10.6801	2	0.680039	0	0	0	0	0	0	0	0	0	0	0	0	0	0	0	0	0	0	0	0	0	0	8	3.06944	0	0	0
RESF_300120_TM_#01	antibiotic inactivation enzyme; AAC(3)-IV	apramycin, plazomicin, aminoglycoside antibiotic	0000037, 3003675, 0000016	3000557	3002539	5	0	0	0	0	0	0	0	0	0	0	151	7.72904	0	0	0	0	0	0	0	0	0	0	0	0	0	0	0	0	0	0	359	69.4464	0	0	0	0	0	0	0	0	0	0	0
RESF_300250_TM_#02	antibiotic inactivation enzyme; AAC(3)-VIa	gentamicin C, gentamicin B, aminoglycoside antibiotic	0000014, 3000655, 0000016	3000557	3002540	5	4	0.141358	0	0	0	0	0	0	0	0	0	0	14	1.34794	0	0	0	0	0	0	4	2.75747	0	0	180	15.0498	0	0	0	0	0	0	0	0	0	0	44	0.984663	0	0	0	0	0
RESF_300250_TM_#01	antibiotic inactivation enzyme; AAC(3)-VIa	gentamicin C, gentamicin B, aminoglycoside antibiotic	0000014, 3000655, 0000016	3000557	3002540	5	0	0	0	0	0	0	0	0	0	0	0	0	0	0	0	0	0	0	0	0	6	5.79651	0	0	361	42.1135	0	0	0	0	0	0	0	0	0	0	33	1.00111	0	0	0	0	0
RESF_300260_TM_#01	antibiotic inactivation enzyme; AAC(3)-VIIIa	neomycin, aminoglycoside antibiotic	0000005, 0000016	3000557	3002542	5	0	0	0	0	0	0	0	0	0	0	2	0.0845209	0	0	0	0	0	0	0	0	0	0	0	0	0	0	0	0	0	0	0	0	0	0	0	0	0	0	0	0	0	0	0
CARD_101393_TM_#01	antibiotic inactivation enzyme; AAC(3)-Xa	kanamycin A, aminoglycoside antibiotic	0000049, 0000016	3000557	3002544	5	0	0	0	0	0	0	0	0	26	1.19386	0	0	0	0	4	0.125195	0	0	0	0	0	0	0	0	0	0	0	0	0	0	0	0	0	0	0	0	0	0	2	0.0706355	0	0	0
RESF_300125_TM_#01	antibiotic inactivation enzyme; AAC(3)-Xa	kanamycin A, aminoglycoside antibiotic	0000049, 0000016	3000557	3002544	5	0	0	0	0	0	0	0	0	14	0.643535	0	0	0	0	4	0.124674	0	0	0	0	0	0	0	0	0	0	0	0	0	0	0	0	0	0	0	0	0	0	2	0.0703412	0	0	0
CARD_101480_TM_#02	antibiotic inactivation enzyme; AAC(6')	aminoglycoside antibiotic	16	3000557	3000345	4	0	0	56	199.756	2	1.59111	2	0.418019	0	0	0	0	82	34.8401	0	0	2	0.496564	0	0	0	0	0	0	17	4.97617	0	0	0	0	0	0	113	90.6449	1	3.25522	105	8.49056	8	2.03592	12	2.47483	0
CARD_101560_TM_#05	antibiotic inactivation enzyme; AAC(6')	aminoglycoside antibiotic	16	3000557	3000345	4	0	0	0	0	0	0	1	0.318058	0	0	0	0	0	0	0	0	0	0	0	0	0	0	0	0	0	0	0	0	0	0	22	42.0088	0	0	0	0	0	0	0	0	0	0	0
CARD_101575_TM_#02	antibiotic inactivation enzyme; AAC(6')	aminoglycoside antibiotic	16	3000557	3000345	4	0	0	0	0	0	0	0	0	22	10.0714	0	0	77	47.4374	0	0	0	0	0	0	0	0	0	0	0	0	0	0	0	0	0	0	0	0	0	0	3449	441.528	6	2.03039	0	0	429
NCBI_206570_TM_#04	antibiotic inactivation enzyme; AAC(6')	aminoglycoside antibiotic	16	3000557	3000345	4	0	0	0	0	0	0	0	0	6	3.20397	5	2.2248	3671	2375.51	1	0.325236	5	1.8891	0	0	0	0	0	0	0	0	0	0	0	0	0	0	0	0	1	4.9536	3093	473.185	25	10.2234	1	0.313837	13
NCBI_206570_TM_#06	antibiotic inactivation enzyme; AAC(6')	aminoglycoside antibiotic	16	3000557	3000345	4	0	0	0	0	0	0	0	0	1	0.351933	15	5.60283	4904	2139.39	0	0	0	0	0	0	0	0	0	0	0	0	0	0	0	0	0	0	0	0	0	0	6300	635.681	47	14.1267	0	0	17
NCBI_206197_TM_#05	antibiotic inactivation enzyme; AAC(6')	aminoglycoside antibiotic	16	3000557	3000345	4	0	0	0	0	0	0	0	0	0	0	0	0	79	36.8926	0	0	0	0	0	0	0	0	0	0	0	0	0	0	0	0	0	0	0	0	0	0	6594	665.699	0	0	0	0	104
CARD_101480_TM_#06	antibiotic inactivation enzyme; AAC(6')	aminoglycoside antibiotic	16	3000557	3000345	4	0	0	0	0	0	0	0	0	0	0	0	0	0	0	0	0	2	0.766753	0	0	0	0	0	0	99	41.6705	0	0	0	0	0	0	1	1.65262	0	0	0	0	0	0	0	0	0
CARD_101480_TM_#04	antibiotic inactivation enzyme; AAC(6')	aminoglycoside antibiotic	16	3000557	3000345	4	0	0	0	0	0	0	0	0	0	0	0	0	0	0	0	0	0	0	0	0	0	0	0	0	0	0	0	0	0	0	4	25.6514	2	8.26312	0	0	4	2.05383	0	0	0	0	0
CARD_101560_TM_#06	antibiotic inactivation enzyme; AAC(6')	aminoglycoside antibiotic	16	3000557	3000345	4	0	0	0	0	0	0	0	0	0	0	0	0	0	0	0	0	0	0	0	0	0	0	0	0	0	0	0	0	0	0	21	28.0446	0	0	0	0	0	0	0	0	4	0.902281	0
CARD_101560_TM_#03	antibiotic inactivation enzyme; AAC(6')	aminoglycoside antibiotic	16	3000557	3000345	4	0	0	0	0	0	0	0	0	0	0	0	0	0	0	0	0	0	0	0	0	0	0	0	0	0	0	0	0	0	0	0	0	6	7.99262	0	0	0	0	0	0	13	5.50516	0
NCBI_206418_TM_#01	antibiotic inactivation enzyme; AAC(6')-31	aminoglycoside antibiotic	16	3000557	3002585	5	0	0	56	199.756	2	1.59111	2	0.418019	0	0	0	0	82	34.8401	0	0	2	0.496564	0	0	0	0	0	0	17	4.97617	0	0	0	0	0	0	113	90.6449	1	3.25522	105	8.49056	8	2.03592	12	2.47483	0
NCBI_206418_TM_#04	antibiotic inactivation enzyme; AAC(6')-31	aminoglycoside antibiotic	16	3000557	3002585	5	0	0	11	56.2188	0	0	1	0.430313	0	0	0	0	0	0	0	0	0	0	0	0	0	0	0	0	0	0	0	0	0	0	7	15.8435	35	51.4815	0	0	40	7.14377	2	0.993053	0	0	0
NCBI_206418_TM_#06	antibiotic inactivation enzyme; AAC(6')-31	aminoglycoside antibiotic	16	3000557	3002585	5	0	0	0	0	0	0	0	0	0	0	0	0	7	2.94836	0	0	4	1.31998	3	1.26321	0	0	0	0	0	0	0	0	0	0	10	13.8743	94	87.8172	0	0	14	1.3704	0	0	0	0	0
NCBI_206418_TM_#07	antibiotic inactivation enzyme; AAC(6')-31	aminoglycoside antibiotic	16	3000557	3002585	5	0	0	0	0	0	0	0	0	0	0	0	0	0	0	0	0	6	2.05334	3	1.21965	0	0	0	0	0	0	0	0	0	0	0	0	123	137.147	0	0	1	0.0944292	0	0	0	0	0
NCBI_206418_TM_#03	antibiotic inactivation enzyme; AAC(6')-31	aminoglycoside antibiotic	16	3000557	3002585	5	0	0	0	0	0	0	0	0	0	0	0	0	0	0	0	0	0	0	0	0	0	0	0	0	1	0.353278	0	0	0	0	16	21.2287	54	54.3861	0	0	0	0	0	0	10	2.96423	0
CARD_102163_TM_#01	antibiotic inactivation enzyme; AAC(6')-34	aminoglycoside antibiotic	16	3000557	3003989	5	0	0	0	0	0	0	1	0.0481271	0	0	0	0	15	1.12038	0	0	0	0	3	0.232697	0	0	0	0	0	0	0	0	0	0	0	0	0	0	0	0	0	0	0	0	0	0	4
NCBI_205999_TM_#02	antibiotic inactivation enzyme; AAC(6')-Ia	aminoglycoside antibiotic	16	3000557	3002545	5	0	0	0	0	0	0	0	0	0	0	0	0	0	0	0	0	0	0	0	0	0	0	0	0	0	0	0	0	0	0	0	0	0	0	0	0	0	0	0	0	0	0	3
CARD_100695_TM_#01	antibiotic inactivation enzyme; AAC(6')-Iae	aminoglycoside antibiotic	16	3000557	3002573	5	0	0	0	0	0	0	0	0	0	0	0	0	0	0	0	0	0	0	0	0	0	0	0	0	0	0	0	0	0	0	0	0	0	0	0	0	0	0	0	0	0	0	12
NCBI_206571_TM_#02	antibiotic inactivation enzyme; AAC(6')-Iak	aminoglycoside antibiotic	16	3000557	3003199	5	0	0	0	0	0	0	0	0	1	0.804419	0	0	429	257.788	0	0	0	0	0	0	0	0	0	0	0	0	0	0	0	0	0	0	0	0	0	0	693	103.75	1	0.602925	0	0	45
NCBI_206571_TM_#01	antibiotic inactivation enzyme; AAC(6')-Iak	aminoglycoside antibiotic	16	3000557	3003199	5	0	0	0	0	0	0	0	0	0	0	2	0.660262	91	28.2261	0	0	0	0	0	0	0	0	0	0	0	0	0	0	0	0	0	0	0	0	0	0	893	73.0367	2	0.541681	0	0	5
CARD_102057_TM_#03	antibiotic inactivation enzyme; AAC(6')-Ian	aminoglycoside antibiotic	16	3000557	3003200	5	0	0	0	0	0	0	0	0	0	0	0	0	310	181.034	0	0	0	0	0	0	0	0	0	0	0	0	0	0	0	0	0	0	0	0	0	0	5	0.57547	0	0	0	0	0
CARD_102057_TM_#04	antibiotic inactivation enzyme; AAC(6')-Ian	aminoglycoside antibiotic	16	3000557	3003200	5	0	0	0	0	0	0	0	0	0	0	0	0	171	129.574	0	0	0	0	0	0	7	34.7296	0	0	0	0	0	0	0	0	0	0	0	0	0	0	5	0.805425	0	0	0	0	0
CARD_102057_TM_#08	antibiotic inactivation enzyme; AAC(6')-Ian	aminoglycoside antibiotic	16	3000557	3003200	5	0	0	0	0	0	0	0	0	0	0	0	0	301	174.161	0	0	0	0	0	0	0	0	0	0	0	0	0	0	0	0	0	0	0	0	0	0	0	0	0	0	0	0	0
CARD_101955_TM_#01	antibiotic inactivation enzyme; AAC(6')-Ib7	aminoglycoside antibiotic	16	3000557	3002578	5	28	4.74485	41308	148354	0	0	1124	377.277	127	54.5326	400	176.827	1464	768.51	1248	381.313	9483	3670.26	11	5.13377	27	85.4364	1098	4767.21	2101	942.756	143	246	14	16.9093	652	1116.92	261	276.384	1	4.21973	994	130.257	576	225.848	3385	1146.92	321
CARD_101226_TM_#03	antibiotic inactivation enzyme; AAC(6')-Ic	aminoglycoside antibiotic	16	3000557	3002549	5	0	0	0	0	0	0	0	0	0	0	4	1.34955	0	0	0	0	0	0	0	0	0	0	0	0	0	0	0	0	0	0	2	4.27523	0	0	16	59.9619	182	17.288	8	2.77511	26	6.06161	2
CARD_101226_TM_#04	antibiotic inactivation enzyme; AAC(6')-Ic	aminoglycoside antibiotic	16	3000557	3002549	5	0	0	0	0	0	0	0	0	0	0	4	4.66451	0	0	0	0	0	0	0	0	0	0	0	0	0	0	0	0	0	0	0	0	0	0	2	9.36434	161	36.6724	0	0	0	0	0
RESF_300093_TM_#01	antibiotic inactivation enzyme; AAC(6')-Ie-APH(2'')-Ia	plazomicin, amikacin, gentamicin C, sisomicin, netilmicin, kanamycin A, tobramycin, isepamicin, arbekacin, gentamicin B, aminoglycoside antibiotic	3003675, 0000013, 0000014, 0000035, 0000038, 0000049, 0000052, 3000652, 3000654, 3000655, 0000016	3000557	3002597	5	0	0	0	0	10	2.4861	21	1.35288	0	0	0	0	13	1.36857	0	0	0	0	2	0.181851	0	0	0	0	0	0	0	0	0	0	0	0	0	0	0	0	0	0	0	0	0	0	11
RESF_300093_TM_#02	antibiotic inactivation enzyme; AAC(6')-Ie-APH(2'')-Ia	plazomicin, amikacin, gentamicin C, sisomicin, netilmicin, kanamycin A, tobramycin, isepamicin, arbekacin, gentamicin B, aminoglycoside antibiotic	3003675, 0000013, 0000014, 0000035, 0000038, 0000049, 0000052, 3000652, 3000654, 3000655, 0000016	3000557	3002597	5	0	0	0	0	11	3.12539	19	1.38911	0	0	0	0	0	0	0	0	0	0	0	0	0	0	0	0	0	0	8	3.37683	0	0	1	0.392623	0	0	0	0	0	0	0	0	0	0	13
NCBI_206682_TM_#04	antibiotic inactivation enzyme; AAC(6')-Ie-APH(2'')-Ia	plazomicin, amikacin, gentamicin C, sisomicin, netilmicin, kanamycin A, tobramycin, isepamicin, arbekacin, gentamicin B, aminoglycoside antibiotic	3003675, 0000013, 0000014, 0000035, 0000038, 0000049, 0000052, 3000652, 3000654, 3000655, 0000016	3000557	3002597	5	0	0	0	0	0	0	11	3.5946	0	0	0	0	0	0	0	0	0	0	0	0	0	0	0	0	0	0	0	0	0	0	0	0	0	0	0	0	0	0	0	0	0	0	0
NCBI_206682_TM_#06	antibiotic inactivation enzyme; AAC(6')-Ie-APH(2'')-Ia	plazomicin, amikacin, gentamicin C, sisomicin, netilmicin, kanamycin A, tobramycin, isepamicin, arbekacin, gentamicin B, aminoglycoside antibiotic	3003675, 0000013, 0000014, 0000035, 0000038, 0000049, 0000052, 3000652, 3000654, 3000655, 0000016	3000557	3002597	5	0	0	0	0	0	0	2	3.65766	0	0	0	0	0	0	0	0	0	0	0	0	0	0	0	0	0	0	0	0	0	0	1	9.61926	0	0	0	0	0	0	0	0	0	0	0
NCBI_206515_TM_#01	antibiotic inactivation enzyme; AAC(6')-If	aminoglycoside antibiotic	16	3000557	3002553	5	0	0	0	0	0	0	0	0	0	0	0	0	12	7.27311	0	0	0	0	0	0	0	0	0	0	0	0	0	0	0	0	0	0	0	0	0	0	0	0	0	0	0	0	0
NCBI_206515_TM_#03	antibiotic inactivation enzyme; AAC(6')-If	aminoglycoside antibiotic	16	3000557	3002553	5	0	0	0	0	0	0	0	0	0	0	0	0	46	18.664	0	0	0	0	0	0	0	0	0	0	0	0	0	0	0	0	0	0	0	0	0	0	12	1.3155	0	0	0	0	0
NCBI_206515_TM_#04	antibiotic inactivation enzyme; AAC(6')-If	aminoglycoside antibiotic	16	3000557	3002553	5	0	0	0	0	0	0	0	0	0	0	0	0	17	17.9429	0	0	0	0	0	0	0	0	0	0	0	0	0	0	0	0	0	0	0	0	0	0	17	2.69653	0	0	0	0	0
NCBI_205076_TM_#01	antibiotic inactivation enzyme; AAC(6')-Ig	aminoglycoside antibiotic	16	3000557	3002554	5	0	0	0	0	0	0	0	0	0	0	0	0	0	0	0	0	0	0	0	0	0	0	0	0	0	0	0	0	0	0	0	0	0	0	0	0	8	1.42875	0	0	0	0	0
NCBI_205076_TM_#04	antibiotic inactivation enzyme; AAC(6')-Ig	aminoglycoside antibiotic	16	3000557	3002554	5	0	0	0	0	0	0	0	0	0	0	0	0	0	0	0	0	0	0	0	0	0	0	0	0	0	0	0	0	0	0	0	0	0	0	0	0	2	0.32217	0	0	0	0	0
NCBI_204825_TM_#06	antibiotic inactivation enzyme; AAC(6')-Ii	plazomicin, aminoglycoside antibiotic	3003675, 0000016	3000557	3002556	5	0	0	0	0	0	0	8	3.3763	0	0	0	0	14	5.13705	0	0	0	0	0	0	0	0	0	0	0	0	0	0	0	0	0	0	0	0	0	0	0	0	0	0	0	0	1
NCBI_204825_TM_#03	antibiotic inactivation enzyme; AAC(6')-Ii	plazomicin, aminoglycoside antibiotic	3003675, 0000016	3000557	3002556	5	0	0	0	0	0	0	0	0	0	0	0	0	3	1.43451	0	0	0	0	0	0	0	0	0	0	0	0	0	0	0	0	0	0	0	0	0	0	0	0	0	0	0	0	5
NCBI_204825_TM_#04	antibiotic inactivation enzyme; AAC(6')-Ii	plazomicin, aminoglycoside antibiotic	3003675, 0000016	3000557	3002556	5	0	0	0	0	0	0	0	0	0	0	0	0	14	6.33564	0	0	0	0	0	0	0	0	0	0	0	0	0	0	0	0	0	0	0	0	0	0	0	0	0	0	0	0	12
NCBI_204825_TM_#05	antibiotic inactivation enzyme; AAC(6')-Ii	plazomicin, aminoglycoside antibiotic	3003675, 0000016	3000557	3002556	5	0	0	0	0	0	0	0	0	0	0	0	0	6	3.72425	0	0	0	0	0	0	0	0	0	0	0	0	0	0	0	0	0	0	0	0	0	0	0	0	0	0	0	0	0
NCBI_205771_TM_#01	antibiotic inactivation enzyme; AAC(6')-IIa	aminoglycoside antibiotic	16	3000557	3002594	5	0	0	0	0	0	0	0	0	0	0	0	0	8	0.613975	0	0	0	0	12	0.982498	0	0	0	0	0	0	0	0	0	0	4	1.10725	0	0	0	0	2	0.0350334	0	0	1	0.0496668	0
NCBI_202184_TM_#01	antibiotic inactivation enzyme; AAC(6')-IIa	aminoglycoside antibiotic	16	3000557	3002594	5	0	0	0	0	0	0	0	0	0	0	0	0	0	0	0	0	0	0	12	0.982498	0	0	0	0	0	0	0	0	0	0	0	0	0	0	2	1.55011	2	0.0350334	3	0.182179	0	0	0
NCBI_202250_TM_#01	antibiotic inactivation enzyme; AAC(6')-IIa	aminoglycoside antibiotic	16	3000557	3002594	5	0	0	0	0	0	0	0	0	0	0	0	0	0	0	0	0	0	0	0	0	0	0	0	0	2	0.147411	0	0	0	0	0	0	13	2.24667	0	0	0	0	0	0	5	0.248334	0
NCBI_206548_TM_#01	antibiotic inactivation enzyme; AAC(6')-IIa	aminoglycoside antibiotic	16	3000557	3002594	5	0	0	0	0	0	0	0	0	0	0	0	0	0	0	0	0	0	0	0	0	0	0	0	0	0	0	0	0	0	0	0	0	0	0	0	0	2	0.0350334	0	0	0	0	0
NCBI_205581_TM_#01	antibiotic inactivation enzyme; AAC(6')-IIa	aminoglycoside antibiotic	16	3000557	3002594	5	0	0	0	0	0	0	0	0	0	0	0	0	0	0	0	0	0	0	0	0	0	0	0	0	0	0	0	0	0	0	0	0	0	0	0	0	0	0	45	2.72692	4	0.200044	0
NCBI_206442_TM_#03	antibiotic inactivation enzyme; AAC(6')-IIc	aminoglycoside antibiotic	16	3000557	3002596	5	0	0	11	32.896	0	0	0	0	0	0	0	0	0	0	0	0	0	0	0	0	0	0	0	0	0	0	0	0	0	0	0	0	0	0	0	0	0	0	0	0	0	0	0
NCBI_206442_TM_#04	antibiotic inactivation enzyme; AAC(6')-IIc	aminoglycoside antibiotic	16	3000557	3002596	5	0	0	16	99.2664	0	0	0	0	0	0	0	0	0	0	0	0	0	0	0	0	0	0	0	0	0	0	0	0	0	0	0	0	0	0	0	0	0	0	2	1.20585	0	0	0
NCBI_206442_TM_#01	antibiotic inactivation enzyme; AAC(6')-IIc	aminoglycoside antibiotic	16	3000557	3002596	5	0	0	0	0	6	5.96665	0	0	0	0	0	0	0	0	0	0	0	0	0	0	0	0	0	0	0	0	0	0	0	0	0	0	0	0	0	0	0	0	0	0	0	0	0
NCBI_206442_TM_#08	antibiotic inactivation enzyme; AAC(6')-IIc	aminoglycoside antibiotic	16	3000557	3002596	5	0	0	0	0	0	0	0	0	0	0	1	0.341136	1	0.393115	0	0	0	0	0	0	0	0	0	0	4	1.37368	0	0	0	0	0	0	0	0	0	0	0	0	0	0	0	0	0
NCBI_205214_TM_#01	antibiotic inactivation enzyme; AAC(6')-Iid	aminoglycoside antibiotic	16	3000557	3002589	5	0	0	0	0	0	0	0	0	0	0	0	0	47	3.65623	0	0	0	0	0	0	0	0	0	0	0	0	0	0	0	0	0	0	0	0	0	0	0	0	0	0	0	0	2
NCBI_206637_TM_#01	antibiotic inactivation enzyme; AAC(6')-Iid	aminoglycoside antibiotic	16	3000557	3002589	5	0	0	0	0	0	0	0	0	0	0	0	0	1	0.769138	0	0	0	0	0	0	0	0	0	0	0	0	0	0	0	0	0	0	7	8.82115	0	0	0	0	0	0	0	0	33
NCBI_206637_TM_#02	antibiotic inactivation enzyme; AAC(6')-Iid	aminoglycoside antibiotic	16	3000557	3002589	5	0	0	0	0	0	0	0	0	0	0	0	0	7	2.67553	0	0	0	0	0	0	0	0	0	0	0	0	0	0	0	0	0	0	0	0	0	0	0	0	0	0	0	0	71
NCBI_206637_TM_#03	antibiotic inactivation enzyme; AAC(6')-Iid	aminoglycoside antibiotic	16	3000557	3002589	5	0	0	0	0	0	0	0	0	0	0	0	0	4	4.75804	0	0	0	0	0	0	0	0	0	0	0	0	0	0	0	0	0	0	0	0	0	0	0	0	0	0	0	0	21
NCBI_206637_TM_#04	antibiotic inactivation enzyme; AAC(6')-Iid	aminoglycoside antibiotic	16	3000557	3002589	5	0	0	0	0	0	0	0	0	0	0	0	0	10	7.8452	0	0	0	0	0	0	0	0	0	0	0	0	0	0	0	0	0	0	0	0	0	0	0	0	0	0	0	0	28
CARD_101783_TM_#01	antibiotic inactivation enzyme; AAC(6')-Iih	aminoglycoside antibiotic	16	3000557	3002590	5	0	0	0	0	0	0	151	15.2617	0	0	49	6.88132	44899	7179.68	211	21.4631	0	0	6	0.862681	0	0	0	0	0	0	0	0	0	0	77	41.9294	0	0	0	0	0	0	0	0	0	0	0
CARD_101783_TM_#02	antibiotic inactivation enzyme; AAC(6')-Iih	aminoglycoside antibiotic	16	3000557	3002590	5	0	0	0	0	0	0	26	5.78436	0	0	7	2.8463	10712	4916.64	45	13.0635	0	0	0	0	0	0	0	0	0	0	0	0	0	0	21	31.4096	0	0	0	0	0	0	0	0	0	0	0
NCBI_205103_TM_#04	antibiotic inactivation enzyme; AAC(6')-Ij	aminoglycoside antibiotic	16	3000557	3002557	5	0	0	0	0	0	0	0	0	10	12.9945	0	0	0	0	0	0	0	0	0	0	0	0	0	0	0	0	0	0	0	0	0	0	0	0	0	0	0	0	0	0	0	0	0
NCBI_205103_TM_#02	antibiotic inactivation enzyme; AAC(6')-Ij	aminoglycoside antibiotic	16	3000557	3002557	5	0	0	0	0	0	0	0	0	0	0	0	0	0	0	0	0	0	0	0	0	0	0	0	0	0	0	0	0	0	0	0	0	0	0	0	0	173	21.6007	2	0.595832	0	0	30
CARD_101863_TM_#03	antibiotic inactivation enzyme; AAC(6')-Ik	aminoglycoside antibiotic	16	3000557	3002558	5	0	0	0	0	0	0	0	0	0	0	0	0	0	0	0	0	0	0	0	0	0	0	0	0	0	0	0	0	0	0	0	0	0	0	0	0	11	0.59504	1	0.1711	0	0	0
CARD_100906_TM_#05	antibiotic inactivation enzyme; AAC(6')-Isa	aminoglycoside antibiotic	16	3000557	3002563	5	0	0	1	2.89086	0	0	4	2.3101	1	0.379613	3	1.02341	0	0	1	0.249348	0	0	1	0.397415	0	0	0	0	2	0.683003	0	0	0	0	0	0	0	0	0	0	0	0	8	2.43298	0	0	0
NCBI_206411_TM_#04	antibiotic inactivation enzyme; AAC(6')-Isa	aminoglycoside antibiotic	16	3000557	3002563	5	0	0	0	0	0	0	0	0	0	0	2	1.20401	0	0	0	0	0	0	0	0	0	0	0	0	0	0	0	0	0	0	0	0	0	0	0	0	0	0	0	0	0	0	0
NCBI_206635_TM_#01	antibiotic inactivation enzyme; AAC(6')-Iz	aminoglycoside antibiotic	16	3000557	3002570	5	0	0	0	0	0	0	0	0	6	0.614283	0	0	303	30.0399	0	0	0	0	0	0	0	0	0	0	0	0	0	0	0	0	0	0	0	0	2	2.0715	13100	316.702	4	0.306944	0	0	21
NCBI_205858_TM_#02	antibiotic inactivation enzyme; aadA14	spectinomycin, streptomycin, aminoglycoside antibiotic	0000039, 0000040, 0000016	3000557	3002614	6	139	6.76859	0	0	3688	1187.63	353	29.0366	0	0	133	15.1768	2	0.269052	0	0	0	0	0	0	12	10.3689	0	0	3042	355.874	0	0	0	0	4200	1855.47	230	64.7075	0	0	0	0	0	0	0	0	2
NCBI_205858_TM_#03	antibiotic inactivation enzyme; aadA14	spectinomycin, streptomycin, aminoglycoside antibiotic	0000039, 0000040, 0000016	3000557	3002614	6	49	7.87835	0	0	1207	1261.79	84	22.4084	0	0	42	13.4823	0	0	0	0	0	0	0	0	0	0	0	0	527	199.207	0	0	0	0	1224	1729.05	71	60.7725	0	0	0	0	0	0	0	0	0
NCBI_205858_TM_#04	antibiotic inactivation enzyme; aadA14	spectinomycin, streptomycin, aminoglycoside antibiotic	0000039, 0000040, 0000016	3000557	3002614	6	11	6.04963	0	0	372	1290.08	53	67.1396	0	0	6	7.06373	0	0	0	0	0	0	0	0	0	0	0	0	398	531.601	0	0	0	0	411	2069.82	47	165.605	0	0	0	0	0	0	0	0	0
RESF_300159_TM_#04	antibiotic inactivation enzyme; aadA23	spectinomycin, streptomycin, aminoglycoside antibiotic	0000039, 0000040, 0000016	3000557	3002620	6	2	0.892019	94	430.333	26	38.1028	512	237.26	3	1.77819	85	68.3538	491	427.125	0	0	21	9.60459	1	0.620525	341	2261.65	193	1143.86	92	70.1253	41	115.579	6	6.35905	814	1902.51	102	182.212	3	17.9894	477	84.2541	46	21.0901	0	0	97
RESF_300159_TM_#02	antibiotic inactivation enzyme; aadA23	spectinomycin, streptomycin, aminoglycoside antibiotic	0000039, 0000040, 0000016	3000557	3002620	6	0	0	29	108.367	0	0	153	55.5999	0	0	12	5.96006	303	178.288	0	0	0	0	0	0	33	142.777	75	309.11	115	68.9091	0	0	0	0	176	340.66	16	18.6326	0	0	228	31.0587	17	8.3955	0	0	16
RESF_300159_TM_#05	antibiotic inactivation enzyme; aadA23	spectinomycin, streptomycin, aminoglycoside antibiotic	0000039, 0000040, 0000016	3000557	3002620	6	0	0	56	188.797	31	31.9823	602	185.624	9	3.75395	65	27.4095	783	408.313	0	0	20	11.2176	1	0.436666	270	942.25	176	753.136	118	91.1531	63	108.514	25	21.0281	1142	1736.02	134	154.691	3	12.6592	517	57.9055	84	28.3747	0	0	83
RESF_300159_TM_#07	antibiotic inactivation enzyme; aadA23	spectinomycin, streptomycin, aminoglycoside antibiotic	0000039, 0000040, 0000016	3000557	3002620	6	0	0	192	585.032	49	47.0585	585	167.504	1	0.38834	106	41.147	726	336.493	0	0	14	4.31997	2	1.26321	207	718.633	256	885.242	304	176.767	323	574.83	15	10.3928	1443	2049.49	168	160.284	0	0	731	80.3363	152	52.7155	14	3.50231	119
CARD_102172_TM_#06	antibiotic inactivation enzyme; aadA27	spectinomycin, streptomycin, aminoglycoside antibiotic	0000039, 0000040, 0000016	3000557	3004682	5	3	0.808393	0	0	27	56.9318	73	42.9958	0	0	3481	2723.04	447	400.964	0	0	260	162.163	0	0	0	0	61	682.741	0	0	0	0	0	0	15272	41772.4	16	45.6679	0	0	20	3.73798	141	89.3857	20	9.02281	179
CARD_102172_TM_#02	antibiotic inactivation enzyme; aadA27	spectinomycin, streptomycin, aminoglycoside antibiotic	0000039, 0000040, 0000016	3000557	3004682	5	0	0	0	0	23	45.7928	64	46.8504	0	0	3758	4079.25	646	860.594	0	0	196	167.34	0	0	0	0	194	3169.19	0	0	4	13.2661	0	0	14379	54148.8	16	28.3307	0	0	36	8.8466	115	102.252	96	59.1518	158
CARD_102172_TM_#03	antibiotic inactivation enzyme; aadA27	spectinomycin, streptomycin, aminoglycoside antibiotic	0000039, 0000040, 0000016	3000557	3004682	5	0	0	0	0	13	18.0988	8	3.16997	0	0	2882	1770.89	30	23.8761	0	0	205	98.0658	0	0	0	0	127	659.077	38	29.7437	0	0	0	0	11499	25389.1	12	14.8736	0	0	9	1.23462	51	21.6757	37	13.3538	29
CARD_102172_TM_#04	antibiotic inactivation enzyme; aadA27	spectinomycin, streptomycin, aminoglycoside antibiotic	0000039, 0000040, 0000016	3000557	3004682	5	0	0	0	0	34	47.4306	63	30.9858	0	0	4127	2908.67	443	363.728	0	0	245	131.894	0	0	0	0	132	689.056	20	10.245	0	0	0	0	15752	38347.3	11	22.9302	0	0	8	1.09538	109	55.4943	42	18.1584	223
CARD_102172_TM_#07	antibiotic inactivation enzyme; aadA27	spectinomycin, streptomycin, aminoglycoside antibiotic	0000039, 0000040, 0000016	3000557	3004682	5	0	0	0	0	59	59.6159	125	35.6749	44	17.7021	7964	3343.92	1042	479.118	0	0	517	180.821	0	0	0	0	337	1390.56	78	34.882	0	0	8	5.73635	30910	46238.4	18	17.9605	0	0	5477	615.092	278	95.0098	155	54.001	1105
CARD_102172_TM_#08	antibiotic inactivation enzyme; aadA27	spectinomycin, streptomycin, aminoglycoside antibiotic	0000039, 0000040, 0000016	3000557	3004682	5	0	0	0	0	60	63.8863	131	32.5242	0	0	9481	3538.09	1222	540.812	0	0	574	176.252	0	0	0	0	283	955.485	18	8.14252	0	0	0	0	35933	47443.9	18	17.5954	0	0	31	2.75357	401	124.745	121	28.2084	386
NCBI_200045_TM_#04	antibiotic inactivation enzyme; aadA6/aadA10	spectinomycin, streptomycin, aminoglycoside antibiotic	0000039, 0000040, 0000016	3000557	3002622	6	11	1.6371	0	0	0	0	0	0	0	0	0	0	0	0	0	0	3	0.898952	0	0	0	0	0	0	0	0	0	0	0	0	9	11.9724	0	0	0	0	111	12.1447	23	6.90524	0	0	14
NCBI_200099_TM_#01	antibiotic inactivation enzyme; aadA6/aadA10	spectinomycin, streptomycin, aminoglycoside antibiotic	0000039, 0000040, 0000016	3000557	3002622	6	0	0	82	274.824	0	0	23	8.41883	6	5.33457	31	14.765	689	370.969	0	0	0	0	2	0.87879	0	0	22	101.433	0	0	127	218.552	0	0	107	191.531	37	37.5538	1	4.21973	723	83.7974	72	30.5068	0	0	10
NCBI_200099_TM_#09	antibiotic inactivation enzyme; aadA6/aadA10	spectinomycin, streptomycin, aminoglycoside antibiotic	0000039, 0000040, 0000016	3000557	3002622	6	0	0	16	69.3807	0	0	4	2.3101	0	0	0	0	0	0	0	0	0	0	0	0	1	2.80343	21	69.9648	0	0	0	0	0	0	3	3.8477	0	0	0	0	160	17.0769	53	21.4109	0	0	2
NCBI_200045_TM_#06	antibiotic inactivation enzyme; aadA6/aadA10	spectinomycin, streptomycin, aminoglycoside antibiotic	0000039, 0000040, 0000016	3000557	3002622	6	0	0	177	654.846	48	55.7051	495	184.306	1	0.469244	88	40.6755	505	289.153	0	0	9	3.43974	0	0	143	668.204	268	1607.29	115	49.8416	255	805.776	13	10.8752	1147	2151.9	138	165.533	0	0	601	76.1946	105	42.7221	12	3.62644	93
NCBI_200045_TM_#09	antibiotic inactivation enzyme; aadA6/aadA10	spectinomycin, streptomycin, aminoglycoside antibiotic	0000039, 0000040, 0000016	3000557	3002622	6	0	0	0	0	0	0	0	0	0	0	0	0	9	0.862817	0	0	0	0	0	0	0	0	0	0	0	0	0	0	14	2.24267	27	9.19363	6	1.29291	0	0	0	0	1	0.0746986	22	1.34728	2
NCBI_200099_TM_#03	antibiotic inactivation enzyme; aadA6/aadA10	spectinomycin, streptomycin, aminoglycoside antibiotic	0000039, 0000040, 0000016	3000557	3002622	6	0	0	0	0	0	0	0	0	0	0	0	0	0	0	0	0	6	3.2587	0	0	0	0	0	0	0	0	0	0	0	0	0	0	0	0	0	0	76	14.2487	16	8.4634	0	0	13
NCBI_200045_TM_#03	antibiotic inactivation enzyme; aadA6/aadA10	spectinomycin, streptomycin, aminoglycoside antibiotic	0000039, 0000040, 0000016	3000557	3002622	6	0	0	0	0	0	0	0	0	0	0	0	0	0	0	0	0	3	4.34493	0	0	0	0	0	0	0	0	0	0	0	0	0	0	0	0	0	0	20	9.12815	16	22.6747	0	0	5
CARD_100302_TM_#10	antibiotic inactivation enzyme; aadA9	spectinomycin, streptomycin, aminoglycoside antibiotic	0000039, 0000040, 0000016	3000557	3002609	6	5	1.43714	0	0	0	0	1	0.487688	0	0	0	0	0	0	0	0	0	0	0	0	0	0	0	0	0	0	0	0	0	0	0	0	0	0	0	0	0	0	0	0	0	0	0
CARD_100302_TM_#01	antibiotic inactivation enzyme; aadA9	spectinomycin, streptomycin, aminoglycoside antibiotic	0000039, 0000040, 0000016	3000557	3002609	6	0	0	0	0	0	0	14	6.27028	0	0	7	10.2341	0	0	0	0	0	0	0	0	0	0	0	0	0	0	0	0	0	0	0	0	0	0	0	0	0	0	0	0	0	0	0
CARD_100302_TM_#04	antibiotic inactivation enzyme; aadA9	spectinomycin, streptomycin, aminoglycoside antibiotic	0000039, 0000040, 0000016	3000557	3002609	6	0	0	0	0	0	0	6	2.3101	0	0	0	0	19	11.8045	0	0	0	0	0	0	0	0	0	0	0	0	0	0	0	0	0	0	0	0	0	0	0	0	0	0	0	0	0
CARD_100302_TM_#09	antibiotic inactivation enzyme; aadA9	spectinomycin, streptomycin, aminoglycoside antibiotic	0000039, 0000040, 0000016	3000557	3002609	6	0	0	0	0	0	0	3	1.84625	0	0	6	5.11703	0	0	0	0	0	0	0	0	0	0	0	0	0	0	0	0	0	0	0	0	0	0	0	0	0	0	0	0	0	0	0
CARD_100398_TM_#01	antibiotic inactivation enzyme; aadK	streptomycin, aminoglycoside antibiotic	0000040, 0000016	3000557	3002627	5	0	0	28	10.1275	0	0	10	0.292613	0	0	0	0	0	0	0	0	0	0	9	0.443974	0	0	0	0	0	0	0	0	0	0	0	0	0	0	0	0	0	0	0	0	0	0	0
CARD_102168_TM_#01	antibiotic inactivation enzyme; aadS	streptomycin, aminoglycoside antibiotic	0000040, 0000016	3000557	3004683	5	25	0.430615	10	3.58372	34	3.80487	2	0.0604572	0	0	14	0.589464	868	41.6291	0	0	171	6.06299	0	0	36	12.2254	1288	528.025	0	0	42	7.69784	0	0	2359	371.336	89	8.97387	0	0	1875	20.8863	0	0	21	0.624058	0
RESF_302134_TM_#03	antibiotic inactivation enzyme; ACC-4	monobactam, cephalosporin, penam	0000004, 0000032, 3000008	3000557	3001818	6	6986	1125.44	0	0	1660	1641.36	16319	4448.21	6768	2716.72	55287	21025.4	376	172.767	26381	6898.73	820	259.068	30417	13783.8	18166	55644	0	0	37072	13508.8	81908	138660	110177	81386.7	104	139.757	11127	10104.7	1211	4971.9	0	0	1533	475.483	4078	1101.45	726
RESF_302134_TM_#08	antibiotic inactivation enzyme; ACC-4	monobactam, cephalosporin, penam	0000004, 0000032, 3000008	3000557	3001818	6	10291	1762.47	0	0	2122	2203.69	21667	6314.41	8402	3461.22	76989	30714.9	375	178.568	33238	9171.58	1251	429.313	29397	14102.7	23677	77193.3	0	0	45807	17848.9	101717	181108	130143	101305	132	175.656	13903	13434	1314	5734.76	0	0	1847	619.584	4889	1341.27	460
RESF_302134_TM_#13	antibiotic inactivation enzyme; ACC-4	monobactam, cephalosporin, penam	0000004, 0000032, 3000008	3000557	3001818	6	14478	1746.47	20	37.6798	2641	2168.58	30041	6108.28	11717	3827.29	101160	29140.9	384	126.953	47725	10363.6	1717	418.519	34975	11563.7	33614	80100.9	0	0	62791	18132.6	85155	114209	200484	113608	199	212.634	19393	13554.4	1250	4148.74	0	0	2514	604.681	4874	1019.63	618
CARD_101685_TM_#12	antibiotic inactivation enzyme; ACT-35	carbapenem, cephalosporin, cephamycin, penam	0000020, 0000032, 0000044, 3000008	3000557	3001855	6	155	26.1468	0	0	419	460.078	862	271.771	5577	2491.19	15985	7118.54	16203	8520.64	954	290.121	1734	666.082	6	2.77283	67	233.791	3	11.0996	1512	617.305	1984	4085.27	4949	4075.26	833	1272.22	264	294.208	5907	28191.3	206322	25082.6	2988	1041.93	6307	1764.45	52233
ARGA_401412_TM_#12	antibiotic inactivation enzyme; ADC beta-lactamase without carbapenemase activity	cephalosporin	32	3000557	3003846	5	0	0	0	0	0	0	1	0.288763	170	69.0796	0	0	169	75.3501	0	0	0	0	0	0	0	0	0	0	0	0	0	0	0	0	0	0	0	0	4	18.8832	2276	252.892	34	10.4744	18	11.3252	4632
ARGA_401412_TM_#07	antibiotic inactivation enzyme; ADC beta-lactamase without carbapenemase activity	cephalosporin	32	3000557	3003846	5	0	0	0	0	0	0	0	0	54	22.2322	0	0	202	106.439	0	0	0	0	0	0	0	0	0	0	0	0	0	0	0	0	0	0	0	0	4	17.1327	1905	208.449	37	13.4063	32	8.26193	2355
ARGA_401412_TM_#09	antibiotic inactivation enzyme; ADC beta-lactamase without carbapenemase activity	cephalosporin	32	3000557	3003846	5	0	0	0	0	0	0	0	0	2	1.73259	0	0	9	6.24359	0	0	0	0	0	0	0	0	0	0	0	0	0	0	0	0	0	0	0	0	0	0	80	14.208	0	0	14	5.83829	115
ARGA_401412_TM_#17	antibiotic inactivation enzyme; ADC beta-lactamase without carbapenemase activity	cephalosporin	32	3000557	3003846	5	0	0	0	0	0	0	0	0	101	57.7427	0	0	170	109.241	0	0	0	0	0	0	0	0	0	0	0	0	0	0	0	0	0	0	0	0	1	5.69664	1481	240.184	19	9.1236	5	1.80456	2394
ARGA_401412_TM_#18	antibiotic inactivation enzyme; ADC beta-lactamase without carbapenemase activity	cephalosporin	32	3000557	3003846	5	0	0	0	0	0	0	0	0	65	57.4522	0	0	154	158.372	0	0	0	0	0	0	0	0	0	0	0	0	0	0	0	0	0	0	0	0	0	0	1036	265.129	18	9.64169	0	0	1619
CARD_101083_TM_#01	antibiotic inactivation enzyme; AER-1	penam	3000008	3000557	3002481	6	0	0	0	0	0	0	0	0	0	0	0	0	52	2.36319	0	0	0	0	14	0.642264	0	0	0	0	0	0	0	0	0	0	0	0	40	3.80258	0	0	0	0	0	0	0	0	0
CARD_102405_TM_#01	antibiotic inactivation enzyme; Agrobacterium fabrum chloramphenicol acetyltransferase	chloramphenicol, phenicol antibiotic	3000385, 3000387	3000557	3004451	4	0	0	0	0	0	0	20	0.883495	22	1.51074	17	1.04265	1451	102.541	6	0.261961	4	0.211948	6	0.427917	32	16.347	0	0	0	0	578	161.443	0	0	4	0.938465	0	0	5	3.47356	5550	90.8403	17	0.866934	9	0.367338	1
CARD_100665_TM_#01	antibiotic inactivation enzyme; AIM-1	cephalosporin, cephamycin, penam	0000032, 0000044, 3000008	3000557	3000853	7	0	0	0	0	0	0	0	0	8	0.352854	10	0.389044	1842	84.3058	0	0	0	0	0	0	0	0	52	19.0046	0	0	0	0	0	0	2	0.301781	11	1.06795	0	0	6948	73.7351	0	0	258	7.18859	4
RESF_300063_TM_#01	antibiotic inactivation enzyme; ANT(2'')-Ia	gentamicin C, kanamycin A, tobramycin, gentamicin B, plazomicin, aminoglycoside antibiotic	0000014, 0000049, 0000052, 3000655, 3003675, 0000016	3000557	3000230	5	0	0	0	0	0	0	0	0	0	0	0	0	0	0	0	0	0	0	0	0	0	0	0	0	0	0	0	0	0	0	3	3.72358	0	0	0	0	0	0	0	0	0	0	1
RESF_300063_TM_#05	antibiotic inactivation enzyme; ANT(2'')-Ia	gentamicin C, kanamycin A, tobramycin, gentamicin B, plazomicin, aminoglycoside antibiotic	0000014, 0000049, 0000052, 3000655, 3003675, 0000016	3000557	3000230	5	0	0	0	0	0	0	0	0	0	0	0	0	0	0	0	0	0	0	0	0	0	0	0	0	0	0	0	0	0	0	4	5.91955	0	0	0	0	0	0	0	0	0	0	0
RESF_300063_TM_#07	antibiotic inactivation enzyme; ANT(2'')-Ia	gentamicin C, kanamycin A, tobramycin, gentamicin B, plazomicin, aminoglycoside antibiotic	0000014, 0000049, 0000052, 3000655, 3003675, 0000016	3000557	3000230	5	0	0	0	0	0	0	0	0	0	0	0	0	0	0	0	0	0	0	0	0	0	0	0	0	0	0	0	0	0	0	4	5.13027	0	0	0	0	0	0	0	0	4	0.965136	0
NCBI_205061_TM_#02	antibiotic inactivation enzyme; ANT(3'')	aminoglycoside antibiotic	16	3000557	3004275	4	1	0.139078	0	0	126	125.639	164	48.0254	6	2.17972	8979	3632.62	1613	781.097	0	0	504	169.303	0	0	0	0	375	1389.01	84	33.2689	4	5.99115	0	0	33906	48683.2	22	17.5925	0	0	4461	465.417	338	113.022	156	40.5883	848
NCBI_205061_TM_#07	antibiotic inactivation enzyme; ANT(3'')	aminoglycoside antibiotic	16	3000557	3004275	4	0	0	0	0	0	0	10	2.63988	7	3.42752	1253	425.754	210	83.7931	0	0	69	19.185	0	0	0	0	31	134.643	0	0	0	0	0	0	4110	5517.34	4	3.34239	0	0	420	43.6133	43	12.6712	18	4.20771	675
NCBI_205061_TM_#05	antibiotic inactivation enzyme; ANT(3'')	aminoglycoside antibiotic	16	3000557	3004275	4	0	0	0	0	0	0	0	0	1	0.450474	0	0	36	17.5356	0	0	0	0	0	0	0	0	10	40.0125	0	0	0	0	0	0	0	0	0	0	0	0	457	58.591	0	0	0	0	469
NCBI_202242_TM_#02	antibiotic inactivation enzyme; ANT(3'')-Ia	aminoglycoside antibiotic	16	3000557	3000232	5	2	0.117584	147	195.287	0	0	104	10.8466	0	0	48	7.27589	944	161.81	0	0	0	0	20	3.16139	45	49.6248	2	2.80083	0	0	315	222.24	0	0	247	138.002	44	15.8772	8	13.3519	1638	65.5693	189	22.9427	0	0	19
NCBI_202064_TM_#02	antibiotic inactivation enzyme; ANT(3'')-Ia	aminoglycoside antibiotic	16	3000557	3000232	5	0	0	2	5.59522	0	0	1	0.235978	0	0	6	1.98079	21	11.386	0	0	0	0	0	0	0	0	0	0	0	0	0	0	0	0	3	3.72358	0	0	0	0	3492	361.26	0	0	0	0	0
NCBI_202243_TM_#01	antibiotic inactivation enzyme; ANT(3'')-Ia	aminoglycoside antibiotic	16	3000557	3000232	5	0	0	82	245.566	0	0	23	7.22222	6	4.31305	33	14.1268	735	352.053	0	0	0	0	2	0.790414	0	0	22	89.0966	0	0	127	196.682	0	0	110	167.999	37	33.2607	1	3.79776	826	83.468	80	28.3277	0	0	10
NCBI_202242_TM_#03	antibiotic inactivation enzyme; ANT(3'')-Ia	aminoglycoside antibiotic	16	3000557	3000232	5	0	0	48	187.039	21	24.3638	558	197.046	9	4.2232	60	29.9688	706	403.287	0	0	12	4.86932	1	0.491249	225	871.456	146	630.907	118	122.978	63	122.104	24	23.2947	1041	1809.86	127	179.96	3	14.2416	468	58.8583	79	30.2827	0	0	79
NCBI_202242_TM_#05	antibiotic inactivation enzyme; ANT(3'')-Ia	aminoglycoside antibiotic	16	3000557	3000232	5	0	0	52	214.883	0	0	19	7.42047	0	0	10	4.87337	285	181.29	0	0	0	0	2	2.21062	0	0	0	0	51	24.8966	228	663.134	0	0	82	241.478	40	52.9137	0	0	372	60.85	67	34.2728	0	0	14
NCBI_202064_TM_#03	antibiotic inactivation enzyme; ANT(3'')-Ia	aminoglycoside antibiotic	16	3000557	3000232	5	0	0	0	0	0	0	1	0.562717	0	0	7	5.51065	4	3.62875	0	0	0	0	0	0	0	0	0	0	0	0	7	25.1895	0	0	2	5.99743	0	0	0	0	1585	424.003	2	1.29861	0	0	0
NCBI_202243_TM_#05	antibiotic inactivation enzyme; ANT(3'')-Ia	aminoglycoside antibiotic	16	3000557	3000232	5	0	0	0	0	0	0	0	0	0	0	2	0.26582	2	0.306323	0	0	0	0	0	0	0	0	4	5.18382	0	0	0	0	0	0	0	0	0	0	0	0	0	0	0	0	0	0	7
NCBI_202064_TM_#05	antibiotic inactivation enzyme; ANT(3'')-Ia	aminoglycoside antibiotic	16	3000557	3000232	5	0	0	0	0	0	0	0	0	0	0	0	0	10	22.9469	0	0	0	0	0	0	0	0	0	0	0	0	0	0	0	0	0	0	0	0	0	0	543	235.087	0	0	0	0	0
NCBI_202064_TM_#08	antibiotic inactivation enzyme; ANT(3'')-Ia	aminoglycoside antibiotic	16	3000557	3000232	5	0	0	0	0	0	0	0	0	0	0	0	0	6	6.57113	0	0	0	0	4	6.4309	0	0	0	0	0	0	2	8.70588	0	0	0	0	0	0	0	0	1320	431.255	0	0	0	0	0
NCBI_202064_TM_#07	antibiotic inactivation enzyme; ANT(3'')-Ia	aminoglycoside antibiotic	16	3000557	3000232	5	0	0	0	0	0	0	0	0	0	0	0	0	0	0	0	0	0	0	0	0	0	0	0	0	0	0	33	516.549	0	0	0	0	0	0	0	0	740	334.576	0	0	0	0	0
NCBI_202243_TM_#04	antibiotic inactivation enzyme; ANT(3'')-Ia	aminoglycoside antibiotic	16	3000557	3000232	5	0	0	0	0	0	0	0	0	0	0	0	0	0	0	0	0	0	0	0	0	0	0	0	0	0	0	0	0	0	0	0	0	0	0	0	0	1	0.182563	12	5.45921	0	0	2
CARD_102299_TM_#01	antibiotic inactivation enzyme; ANT(3'')-IIb	aminoglycoside antibiotic	16	3000557	3004090	5	0	0	0	0	0	0	0	0	0	0	34	1.47587	289	15.3024	0	0	0	0	0	0	0	0	0	0	0	0	0	0	0	0	22	3.58662	0	0	0	0	34866	430.949	2	0.0715334	0	0	416
RESF_300187_TM_#06	antibiotic inactivation enzyme; ANT(4')-Ib	neomycin, ribostamycin, kanamycin A, tobramycin, isepamicin, G418, gentamicin B, paromomycin, lividomycin A, lividomycin B, aminoglycoside antibiotic	0000005, 0000021, 0000049, 0000052, 3000652, 3000653, 3000655, 3000657, 3000700, 3000701, 0000016	3000557	3003905	5	12	1.43509	0	0	4	4.8425	249	67.7751	2	0.979292	11	4.11566	0	0	0	0	0	0	0	0	0	0	0	0	149	44.1998	0	0	0	0	2	3.34583	0	0	5	21.0583	24	2.59852	7	2.5585	18	4.01613	54
RESF_300187_TM_#01	antibiotic inactivation enzyme; ANT(4')-Ib	neomycin, ribostamycin, kanamycin A, tobramycin, isepamicin, G418, gentamicin B, paromomycin, lividomycin A, lividomycin B, aminoglycoside antibiotic	0000005, 0000021, 0000049, 0000052, 3000652, 3000653, 3000655, 3000657, 3000700, 3000701, 0000016	3000557	3003905	5	0	0	0	0	0	0	98	68.113	2	2.50264	6	5.60717	0	0	0	0	0	0	0	0	0	0	5	55.4979	0	0	0	0	0	0	0	0	0	0	0	0	11	1.79797	0	0	0	0	14
NCBI_204738_TM_#01	antibiotic inactivation enzyme; ANT(6)	aminoglycoside antibiotic	16	3000557	3000225	4	35	4.19057	0	0	9707	7059.68	1780	322.236	11	3.31289	1598	404.008	13	4.09886	0	0	0	0	7	2.2925	91	200.084	0	0	391	104.708	7	9.02833	2	1.1154	100	103.489	49	29.5006	173	504.395	18	1.11871	9	1.89586	0	0	1
NCBI_204738_TM_#02	antibiotic inactivation enzyme; ANT(6)	aminoglycoside antibiotic	16	3000557	3000225	4	6	0.994945	0	0	821	1175.91	264	92.7659	0	0	213	118.252	0	0	0	0	0	0	0	0	10	58.8162	0	0	0	0	0	0	0	0	10	20.9673	6	7.4802	14	94.8833	0	0	0	0	0	0	0
NCBI_204738_TM_#03	antibiotic inactivation enzyme; ANT(6)	aminoglycoside antibiotic	16	3000557	3000225	4	52	7.00385	0	0	16776	15612.4	2273	605.083	26	10.5439	2465	918.905	10	3.57377	0	0	0	0	0	0	56	143.16	0	0	688	251.17	0	0	34	22.5108	102	143.383	44	41.3025	6225	24851	20	2.49652	8	3.13118	0	0	31
NCBI_204738_TM_#04	antibiotic inactivation enzyme; ANT(6)	aminoglycoside antibiotic	16	3000557	3000225	4	24	4.94457	0	0	10588	14763.9	26	9.46766	0	0	1079	599.815	0	0	0	0	0	0	1	0.535908	0	0	0	0	83	38.6733	0	0	0	0	2	3.49791	17	20.8456	2	10.6812	0	0	0	0	0	0	0
NCBI_204738_TM_#05	antibiotic inactivation enzyme; ANT(6)	aminoglycoside antibiotic	16	3000557	3000225	4	94	6.14004	0	0	44219	18955.6	71	7.72856	0	0	4937	760.788	0	0	0	0	0	0	0	0	0	0	0	0	200	29.7141	0	0	6	1.91212	28	16.6273	60	22.833	0	0	4	0.17387	0	0	0	0	0
CARD_100858_TM_#01	antibiotic inactivation enzyme; ANT(6)-Ia	streptomycin, aminoglycoside antibiotic	0000040, 0000016	3000557	3002626	5	61	2.77385	0	0	22531	6531.7	3741	279.561	25	2.97452	3455	361.733	22	2.73184	0	0	0	0	26	3.25404	165	143.679	0	0	853	91.6574	7	3.45766	12	2.56305	168	67.3939	100	25.3232	392	463.88	22	0.595669	13	1.11246	0	0	7
CARD_100858_TM_#02	antibiotic inactivation enzyme; ANT(6)-Ia	streptomycin, aminoglycoside antibiotic	0000040, 0000016	3000557	3002626	5	0	0	0	0	138	49.854	3242	302.55	50	7.50896	665	87.2665	4	0.636769	0	0	0	0	4	0.586476	83	88.7376	0	0	890	115.532	0	0	8	2.11389	66	32.9189	45	14.7818	1085	1575.14	9	0.333054	26	2.80957	0	0	42
CARD_101044_TM_#01	antibiotic inactivation enzyme; ANT(6)-Ib	streptomycin, aminoglycoside antibiotic	0000040, 0000016	3000557	3002629	5	0	0	0	0	0	0	128	3.85589	0	0	0	0	0	0	0	0	0	0	0	0	0	0	7	2.91364	0	0	0	0	0	0	22	3.52007	0	0	0	0	0	0	0	0	0	0	0
CARD_101300_TM_#01	antibiotic inactivation enzyme; ANT(9)-Ia	spectinomycin, aminoglycoside antibiotic	0000039, 0000016	3000557	3002630	5	0	0	0	0	0	0	0	0	0	0	8	0.367705	0	0	0	0	0	0	0	0	0	0	0	0	0	0	0	0	0	0	252	44.6536	0	0	47	24.6558	0	0	2	0.0785204	0	0	0
CARD_100123_TM_#02	antibiotic inactivation enzyme; APH(2'')-Ie	amikacin, gentamicin C, sisomicin, netilmicin, kanamycin A, tobramycin, isepamicin, arbekacin, gentamicin B, aminoglycoside antibiotic	0000013, 0000014, 0000035, 0000038, 0000049, 0000052, 3000652, 3000654, 3000655, 0000016	3000557	3002634	5	0	0	0	0	0	0	0	0	0	0	0	0	2	1.57246	0	0	0	0	0	0	0	0	0	0	0	0	0	0	0	0	0	0	0	0	0	0	0	0	0	0	0	0	0
CARD_100123_TM_#05	antibiotic inactivation enzyme; APH(2'')-Ie	amikacin, gentamicin C, sisomicin, netilmicin, kanamycin A, tobramycin, isepamicin, arbekacin, gentamicin B, aminoglycoside antibiotic	0000013, 0000014, 0000035, 0000038, 0000049, 0000052, 3000652, 3000654, 3000655, 0000016	3000557	3002634	5	0	0	0	0	0	0	0	0	0	0	0	0	6	2.38077	0	0	0	0	0	0	0	0	0	0	0	0	0	0	0	0	0	0	0	0	0	0	0	0	0	0	0	0	0
CARD_100123_TM_#06	antibiotic inactivation enzyme; APH(2'')-Ie	amikacin, gentamicin C, sisomicin, netilmicin, kanamycin A, tobramycin, isepamicin, arbekacin, gentamicin B, aminoglycoside antibiotic	0000013, 0000014, 0000035, 0000038, 0000049, 0000052, 3000652, 3000654, 3000655, 0000016	3000557	3002634	5	0	0	0	0	0	0	0	0	0	0	0	0	2	1.72587	0	0	0	0	0	0	0	0	0	0	0	0	0	0	0	0	0	0	0	0	0	0	0	0	0	0	0	0	0
CARD_100123_TM_#08	antibiotic inactivation enzyme; APH(2'')-Ie	amikacin, gentamicin C, sisomicin, netilmicin, kanamycin A, tobramycin, isepamicin, arbekacin, gentamicin B, aminoglycoside antibiotic	0000013, 0000014, 0000035, 0000038, 0000049, 0000052, 3000652, 3000654, 3000655, 0000016	3000557	3002634	5	0	0	0	0	0	0	0	0	0	0	0	0	18	5.73451	0	0	0	0	0	0	0	0	0	0	0	0	0	0	0	0	0	0	0	0	98	273.298	0	0	0	0	0	0	0
CARD_100123_TM_#09	antibiotic inactivation enzyme; APH(2'')-Ie	amikacin, gentamicin C, sisomicin, netilmicin, kanamycin A, tobramycin, isepamicin, arbekacin, gentamicin B, aminoglycoside antibiotic	0000013, 0000014, 0000035, 0000038, 0000049, 0000052, 3000652, 3000654, 3000655, 0000016	3000557	3002634	5	0	0	0	0	0	0	0	0	0	0	0	0	0	0	0	0	0	0	0	0	0	0	0	0	0	0	0	0	0	0	0	0	0	0	40	349.343	0	0	0	0	0	0	0
RESF_300089_TM_#01	antibiotic inactivation enzyme; APH(2'')-If	dibekacin, sisomicin, kanamycin A, tobramycin, gentamicin A, amikacin, gentamicin C, netilmicin, isepamicin, arbekacin, gentamicin B, aminoglycoside antibiotic	0000007, 0000035, 0000049, 0000052, 3004015, 0000013, 0000014, 0000038, 3000652, 3000654, 3000655, 0000016	3000557	3004191	5	0	0	0	0	0	0	3	2.85963	0	0	0	0	0	0	0	0	0	0	0	0	0	0	0	0	0	0	0	0	0	0	2	8.24508	0	0	0	0	0	0	0	0	0	0	0
RESF_300089_TM_#04	antibiotic inactivation enzyme; APH(2'')-If	dibekacin, sisomicin, kanamycin A, tobramycin, gentamicin A, amikacin, gentamicin C, netilmicin, isepamicin, arbekacin, gentamicin B, aminoglycoside antibiotic	0000007, 0000035, 0000049, 0000052, 3004015, 0000013, 0000014, 0000038, 3000652, 3000654, 3000655, 0000016	3000557	3004191	5	0	0	0	0	0	0	9	2.1946	0	0	0	0	0	0	0	0	0	0	0	0	0	0	0	0	0	0	0	0	0	0	0	0	0	0	0	0	0	0	0	0	0	0	0
RESF_300089_TM_#06	antibiotic inactivation enzyme; APH(2'')-If	dibekacin, sisomicin, kanamycin A, tobramycin, gentamicin A, amikacin, gentamicin C, netilmicin, isepamicin, arbekacin, gentamicin B, aminoglycoside antibiotic	0000007, 0000035, 0000049, 0000052, 3004015, 0000013, 0000014, 0000038, 3000652, 3000654, 3000655, 0000016	3000557	3004191	5	0	0	0	0	0	0	5	1.21922	0	0	0	0	0	0	0	0	0	0	0	0	0	0	0	0	0	0	0	0	0	0	0	0	0	0	0	0	0	0	0	0	0	0	0
RESF_300089_TM_#09	antibiotic inactivation enzyme; APH(2'')-If	dibekacin, sisomicin, kanamycin A, tobramycin, gentamicin A, amikacin, gentamicin C, netilmicin, isepamicin, arbekacin, gentamicin B, aminoglycoside antibiotic	0000007, 0000035, 0000049, 0000052, 3004015, 0000013, 0000014, 0000038, 3000652, 3000654, 3000655, 0000016	3000557	3004191	5	0	0	0	0	0	0	9	3.13514	0	0	0	0	0	0	0	0	0	0	0	0	0	0	0	0	0	0	0	0	0	0	0	0	0	0	0	0	0	0	0	0	0	0	0
CARD_100955_TM_#01	antibiotic inactivation enzyme; APH(2'')-IIIa	amikacin, gentamicin C, sisomicin, netilmicin, kanamycin A, tobramycin, isepamicin, arbekacin, gentamicin B, aminoglycoside antibiotic	0000013, 0000014, 0000035, 0000038, 0000049, 0000052, 3000652, 3000654, 3000655, 0000016	3000557	3002636	5	0	0	0	0	0	0	0	0	0	0	0	0	0	0	0	0	0	0	0	0	0	0	0	0	0	0	0	0	0	0	6	0.905342	0	0	23	10.1866	0	0	0	0	0	0	0
RESF_300083_TM_#07	antibiotic inactivation enzyme; APH(3')-Ia	ribostamycin, kanamycin A, paromomycin, lividomycin A, lividomycin B, neomycin, G418, aminoglycoside antibiotic	0000021, 0000049, 3000657, 3000700, 3000701, 0000005, 3000653, 0000016	3000557	3002641	5	2	0.862285	22	112.54	866	2067.1	2	1.43947	2	0.794955	53	42.1697	3	3.00197	0	0	1	0.868987	2	1.179	12	67.2824	1	9.66738	30	13.5035	37	171.497	0	0	4184	13665.4	0	0	0	0	20	4.51843	1	0.844095	0	0	364
RESF_300083_TM_#06	antibiotic inactivation enzyme; APH(3')-Ia	ribostamycin, kanamycin A, paromomycin, lividomycin A, lividomycin B, neomycin, G418, aminoglycoside antibiotic	0000021, 0000049, 3000657, 3000700, 3000701, 0000005, 3000653, 0000016	3000557	3002641	5	0	0	11	34.0709	2273	2412.44	2	0.528895	0	0	100	44.9852	9	3.90459	5	1.84199	0	0	1	0.421071	0	0	10	49.1293	111	43.7273	61	121.371	1	0.717044	10916	16447.7	4	3.92627	0	0	46	6.25049	12	4.33154	18	4.65296	856
RESF_300083_TM_#08	antibiotic inactivation enzyme; APH(3')-Ia	ribostamycin, kanamycin A, paromomycin, lividomycin A, lividomycin B, neomycin, G418, aminoglycoside antibiotic	0000021, 0000049, 3000657, 3000700, 3000701, 0000005, 3000653, 0000016	3000557	3002641	5	0	0	0	0	2053	1882.03	4	1.56757	0	0	53	17.1025	18	6.46196	2	0.846841	1	0.263329	6	2.14363	1	2.54857	95	390.577	80	26.325	0	0	7	4.25881	9184	11795.8	6	5.01472	2	6.90502	11	0.997548	20	5.11834	2	0.43747	1563
CARD_101812_TM_#03	antibiotic inactivation enzyme; APH(3'')-Ia	plazomicin, streptomycin, aminoglycoside antibiotic	3003675, 0000040, 0000016	3000557	3002638	5	0	0	0	0	92	37.8941	0	0	0	0	0	0	0	0	4	0.446593	0	0	0	0	0	0	0	0	0	0	0	0	0	0	0	0	0	0	0	0	0	0	0	0	0	0	0
CARD_101812_TM_#02	antibiotic inactivation enzyme; APH(3'')-Ia	plazomicin, streptomycin, aminoglycoside antibiotic	3003675, 0000040, 0000016	3000557	3002638	5	0	0	0	0	0	0	0	0	1	0.17876	0	0	0	0	0	0	0	0	0	0	0	0	0	0	0	0	0	0	0	0	0	0	0	0	0	0	0	0	0	0	0	0	0
RESF_300200_TM_#01	antibiotic inactivation enzyme; APH(3')-Ib	ribostamycin, kanamycin A, gentamicin B, paromomycin, lividomycin A, lividomycin B, neomycin, G418, aminoglycoside antibiotic	0000021, 0000049, 3000655, 3000657, 3000700, 3000701, 0000005, 3000653, 0000016	3000557	3002642	5	0	0	0	0	0	0	0	0	0	0	0	0	1099	131.849	0	0	0	0	0	0	0	0	0	0	0	0	0	0	0	0	0	0	0	0	0	0	26	0.757442	0	0	0	0	0
RESF_300200_TM_#02	antibiotic inactivation enzyme; APH(3')-Ib	ribostamycin, kanamycin A, gentamicin B, paromomycin, lividomycin A, lividomycin B, neomycin, G418, aminoglycoside antibiotic	0000021, 0000049, 3000655, 3000657, 3000700, 3000701, 0000005, 3000653, 0000016	3000557	3002642	5	0	0	0	0	0	0	0	0	0	0	0	0	830	128.874	0	0	0	0	0	0	0	0	0	0	0	0	0	0	0	0	0	0	0	0	0	0	25	0.963701	0	0	0	0	0
NCBI_202844_TM_#02	antibiotic inactivation enzyme; APH(3'')-Ib	streptomycin, aminoglycoside antibiotic	0000040, 0000016	3000557	3002639	5	54401	11481.2	1376	5103.92	54676	67826.7	111	40.5626	439	240.777	412	186.428	4461	2638.18	3	0.897652	1062	433.837	0	0	1381	5509.93	406	1847.87	3056	1612.01	7	13.0008	13	11.4079	11038	19029.1	120	142.458	2	17.9894	1759	258.238	202	88.5486	680	226.16	6327
NCBI_202844_TM_#03	antibiotic inactivation enzyme; APH(3'')-Ib	streptomycin, aminoglycoside antibiotic	0000040, 0000016	3000557	3002639	5	207814	19129.7	5193	10039	181479	112635	524	80.105	1421	354.599	1870	410.451	17262	4329.27	53	8.80673	4630	866.53	0	0	4956	9008.21	1324	2874.06	8444	1794.11	12	12.4843	96	39.2502	39510	33363.3	344	183.924	6	15.8976	7295	425.153	793	141.669	1997	310.12	21881
NCBI_202844_TM_#04	antibiotic inactivation enzyme; APH(3'')-Ib	streptomycin, aminoglycoside antibiotic	0000040, 0000016	3000557	3002639	5	40836	19261.5	1286	10842.2	39939	111305	109	103.161	285	321.428	332	398.421	3273	4547.27	8	5.44031	484	487.559	0	0	826	7453.39	553	5809.2	1330	1462.32	0	0	8	14.6587	8624	35634	46	132.639	6	62.1451	1364	438.146	121	115.006	279	213.224	3017
NCBI_202844_TM_#05	antibiotic inactivation enzyme; APH(3'')-Ib	streptomycin, aminoglycoside antibiotic	0000040, 0000016	3000557	3002639	5	122710	12156.7	3309	6942.71	125144	83554.6	286	47.813	902	243.671	1102	258.606	10635	2865.9	43	7.28584	1555	312.539	0	0	2763	5369.81	980	2342.85	5503	1295.23	0	0	43	19.5236	23076	21067.8	186	106.927	5	14.2416	4222	266.715	400	78.6763	1058	178.644	9151
RESF_300201_TM_#01	antibiotic inactivation enzyme; APH(3'')-Ic	streptomycin, aminoglycoside antibiotic	0000040, 0000016	3000557	3002640	5	0	0	0	0	0	0	0	0	2	0.104924	0	0	0	0	0	0	0	0	0	0	0	0	0	0	0	0	0	0	0	0	0	0	0	0	0	0	0	0	0	0	0	0	0
RESF_300203_TM_#02	antibiotic inactivation enzyme; APH(3')-IIa	ribostamycin, butirosin, gentamicin B, paromomycin, neomycin, G418, aminoglycoside antibiotic	0000021, 0000024, 3000655, 3000657, 0000005, 3000653, 0000016	3000557	3002644	5	4	0.0870995	56	25.1049	0	0	0	0	0	0	34	1.85365	0	0	0	0	0	0	6	0.382149	0	0	202	108.461	80	4.34748	12	3.01131	2	0.204175	3967	816.167	10	1.33085	11	6.33223	0	0	6	0.27376	76	2.80805	0
RESF_300203_TM_#01	antibiotic inactivation enzyme; APH(3')-IIa	ribostamycin, butirosin, gentamicin B, paromomycin, neomycin, G418, aminoglycoside antibiotic	0000021, 0000024, 3000655, 3000657, 0000005, 3000653, 0000016	3000557	3002644	5	0	0	0	0	0	0	0	0	0	0	0	0	0	0	0	0	0	0	0	0	0	0	19	111.884	0	0	0	0	2	12.0463	226	517.898	2	2.9164	0	0	0	0	0	0	0	0	0
CARD_100894_TM_#01	antibiotic inactivation enzyme; APH(3')-IIb	ribostamycin, butirosin, kanamycin A, gentamicin B, paromomycin, neomycin, G418, aminoglycoside antibiotic	0000021, 0000024, 0000049, 3000655, 3000657, 0000005, 3000653, 0000016	3000557	3002645	5	0	0	0	0	0	0	0	0	0	0	0	0	0	0	0	0	0	0	0	0	0	0	0	0	0	0	0	0	0	0	0	0	0	0	0	0	2417	119.358	0	0	0	0	0
CARD_100894_TM_#03	antibiotic inactivation enzyme; APH(3')-IIb	ribostamycin, butirosin, kanamycin A, gentamicin B, paromomycin, neomycin, G418, aminoglycoside antibiotic	0000021, 0000024, 0000049, 3000655, 3000657, 0000005, 3000653, 0000016	3000557	3002645	5	0	0	0	0	0	0	0	0	0	0	0	0	0	0	0	0	0	0	0	0	0	0	0	0	0	0	0	0	0	0	0	0	0	0	0	0	3416	80.181	0	0	0	0	0
CARD_100960_TM_#06	antibiotic inactivation enzyme; APH(3')-IIc	ribostamycin, butirosin, kanamycin A, gentamicin B, paromomycin, neomycin, G418, aminoglycoside antibiotic	0000021, 0000024, 0000049, 3000655, 3000657, 0000005, 3000653, 0000016	3000557	3002646	5	3	0.862285	0	0	0	0	0	0	0	0	2	1.36454	223	187.366	0	0	0	0	0	0	0	0	0	0	0	0	0	0	0	0	0	0	0	0	4	30.5547	138	42.4147	10	8.8809	0	0	6
CARD_100960_TM_#03	antibiotic inactivation enzyme; APH(3')-IIc	ribostamycin, butirosin, kanamycin A, gentamicin B, paromomycin, neomycin, G418, aminoglycoside antibiotic	0000021, 0000024, 0000049, 3000655, 3000657, 0000005, 3000653, 0000016	3000557	3002646	5	0	0	0	0	2	1.98888	0	0	5	2.01105	10	6.75218	1382	689.325	0	0	0	0	0	0	0	0	0	0	0	0	30	49.8079	2	1.43409	0	0	0	0	23	95.042	9216	1038.38	11	3.67784	2	0.515589	14
CARD_100960_TM_#04	antibiotic inactivation enzyme; APH(3')-IIc	ribostamycin, butirosin, kanamycin A, gentamicin B, paromomycin, neomycin, G418, aminoglycoside antibiotic	0000021, 0000024, 0000049, 3000655, 3000657, 0000005, 3000653, 0000016	3000557	3002646	5	0	0	0	0	0	0	0	0	21	9.16525	6	2.53792	1360	682.426	0	0	0	0	0	0	1	3.11492	0	0	0	0	56	98.7628	0	0	0	0	0	0	16	67.6753	10170	1197.36	44	14.3262	0	0	33
CARD_100960_TM_#08	antibiotic inactivation enzyme; APH(3')-IIc	ribostamycin, butirosin, kanamycin A, gentamicin B, paromomycin, neomycin, G418, aminoglycoside antibiotic	0000021, 0000024, 0000049, 3000655, 3000657, 0000005, 3000653, 0000016	3000557	3002646	5	0	0	0	0	0	0	0	0	15	12.5663	2	0.982533	1293	839.285	0	0	0	0	0	0	0	0	0	0	0	0	0	0	0	0	0	0	0	0	12	65.1044	8637	1441.41	17	8.16843	0	0	24
RESF_300074_TM_#01	antibiotic inactivation enzyme; APH(3')-IIIa	ribostamycin, butirosin, kanamycin A, gentamicin B, paromomycin, lividomycin A, lividomycin B, plazomicin, neomycin, G418, aminoglycoside antibiotic	0000021, 0000024, 0000049, 3000655, 3000657, 3000700, 3000701, 3003675, 0000005, 3000653, 0000016	3000557	3002647	5	182	8.41474	4	3.81213	52380	15644.5	120	9.15803	0	0	6328	685.258	0	0	0	0	0	0	0	0	0	0	0	0	7	0.769886	0	0	20	4.05151	57	23.304	118	30.7828	0	0	39	1.12183	2	0.169952	0	0	12
RESF_300074_TM_#02	antibiotic inactivation enzyme; APH(3')-IIIa	ribostamycin, butirosin, kanamycin A, gentamicin B, paromomycin, lividomycin A, lividomycin B, plazomicin, neomycin, G418, aminoglycoside antibiotic	0000021, 0000024, 0000049, 3000655, 3000657, 3000700, 3000701, 3003675, 0000005, 3000653, 0000016	3000557	3002647	5	53	8.78696	12	49.5577	17424	21236.2	49	15.0449	0	0	1697	708.589	0	0	0	0	0	0	0	0	0	0	0	0	57	27.7851	0	0	22	16.8152	29	44.2763	30	35.0071	0	0	3	0.391206	4	1.01291	0	0	0
RESF_300074_TM_#03	antibiotic inactivation enzyme; APH(3')-IIIa	ribostamycin, butirosin, kanamycin A, gentamicin B, paromomycin, lividomycin A, lividomycin B, plazomicin, neomycin, G418, aminoglycoside antibiotic	0000021, 0000024, 0000049, 3000655, 3000657, 3000700, 3000701, 3003675, 0000005, 3000653, 0000016	3000557	3002647	5	20	3.22761	0	0	4452	5489.81	6	2.92896	0	0	687	316.729	0	0	0	0	0	0	3	1.68428	0	0	0	0	0	0	0	0	0	0	0	0	4	3.63257	0	0	0	0	0	0	0	0	0
RESF_300074_TM_#04	antibiotic inactivation enzyme; APH(3')-IIIa	ribostamycin, butirosin, kanamycin A, gentamicin B, paromomycin, lividomycin A, lividomycin B, plazomicin, neomycin, G418, aminoglycoside antibiotic	0000021, 0000024, 0000049, 3000655, 3000657, 3000700, 3000701, 3003675, 0000005, 3000653, 0000016	3000557	3002647	5	1	0.331648	0	0	4447	12142.1	20	19.5139	0	0	391	418.437	0	0	0	0	0	0	0	0	0	0	0	0	6	4.72848	0	0	0	0	1	2.95977	13	24.7894	0	0	0	0	0	0	0	0	0
ARGA_400119_TM_#01	antibiotic inactivation enzyme; APH(3')-VIa	amikacin, ribostamycin, butirosin, kanamycin A, isepamicin, gentamicin B, paromomycin, neomycin, G418, aminoglycoside antibiotic	0000013, 0000021, 0000024, 0000049, 3000652, 3000655, 3000657, 0000005, 3000653, 0000016	3000557	3002652	5	0	0	0	0	4	4.31715	2	0.731532	99	48.8858	0	0	0	0	3	1.12206	0	0	0	0	0	0	0	0	0	0	0	0	0	0	144	243.062	0	0	0	0	0	0	596	211.216	18	4.69156	159
ARGA_400119_TM_#06	antibiotic inactivation enzyme; APH(3')-VIa	amikacin, ribostamycin, butirosin, kanamycin A, isepamicin, gentamicin B, paromomycin, neomycin, G418, aminoglycoside antibiotic	0000013, 0000021, 0000024, 0000049, 3000652, 3000655, 3000657, 0000005, 3000653, 0000016	3000557	3002652	5	0	0	0	0	9	9.43763	0	0	56	22.9084	0	0	0	0	2	0.467527	0	0	0	0	0	0	0	0	0	0	0	0	0	0	166	224.742	0	0	0	0	0	0	465	139.018	5	1.12785	158
ARGA_400119_TM_#07	antibiotic inactivation enzyme; APH(3')-VIa	amikacin, ribostamycin, butirosin, kanamycin A, isepamicin, gentamicin B, paromomycin, neomycin, G418, aminoglycoside antibiotic	0000013, 0000021, 0000024, 0000049, 3000652, 3000655, 3000657, 0000005, 3000653, 0000016	3000557	3002652	5	0	0	0	0	0	0	0	0	55	23.7915	2	0.829789	0	0	2	0.554106	0	0	0	0	1	3.11492	0	0	0	0	0	0	0	0	162	264.311	0	0	0	0	0	0	739	289.488	6	1.60406	161
ARGA_400119_TM_#08	antibiotic inactivation enzyme; APH(3')-VIa	amikacin, ribostamycin, butirosin, kanamycin A, isepamicin, gentamicin B, paromomycin, neomycin, G418, aminoglycoside antibiotic	0000013, 0000021, 0000024, 0000049, 3000652, 3000655, 3000657, 0000005, 3000653, 0000016	3000557	3002652	5	0	0	0	0	0	0	0	0	37	22.5681	0	0	0	0	4	1.48626	0	0	0	0	0	0	0	0	0	0	0	0	0	0	148	327.834	0	0	0	0	0	0	350	185.094	3	1.03118	86
CARD_102295_TM_#01	antibiotic inactivation enzyme; APH(3')-VIIIb	neomycin, G418, aminoglycoside antibiotic	0000005, 3000653, 0000016	3000557	3004086	5	0	0	0	0	0	0	0	0	0	0	0	0	4	0.220438	0	0	0	0	0	0	0	0	0	0	0	0	0	0	0	0	0	0	0	0	0	0	0	0	0	0	0	0	0
CARD_100191_TM_#01	antibiotic inactivation enzyme; APH(4)-Ia	plazomicin, hygromycin B, aminoglycoside antibiotic	3003675, 3000214, 0000016	3000557	3002655	5	0	0	0	0	8	0.873406	0	0	0	0	96	3.83215	0	0	0	0	0	0	0	0	0	0	0	0	0	0	0	0	0	0	738	110.753	0	0	0	0	0	0	0	0	0	0	0
CARD_101410_TM_#01	antibiotic inactivation enzyme; APH(6)-Ia	plazomicin, streptomycin, aminoglycoside antibiotic	3003675, 0000040, 0000016	3000557	3002657	5	0	0	0	0	24	3.09322	0	0	16	0.834212	0	0	0	0	0	0	0	0	0	0	0	0	0	0	0	0	0	0	0	0	0	0	0	0	0	0	0	0	2	0.0779164	0	0	0
CARD_100828_TM_#01	antibiotic inactivation enzyme; APH(6)-Ib	streptomycin, aminoglycoside antibiotic	0000040, 0000016	3000557	3002658	5	0	0	0	0	0	0	0	0	0	0	0	0	0	0	0	0	0	0	0	0	0	0	0	0	0	0	0	0	0	0	0	0	0	0	0	0	0	0	0	0	15	0.411687	0
NCBI_204506_TM_#02	antibiotic inactivation enzyme; APH(6)-Ic	streptomycin, aminoglycoside antibiotic	0000040, 0000016	3000557	3002659	5	0	0	0	0	0	0	2	0.0805357	0	0	4	0.233922	13	0.858934	0	0	0	0	0	0	0	0	0	0	0	0	0	0	0	0	2115	458.376	12	1.69984	0	0	6	0.0934163	2	0.0920831	0	0	0
NCBI_204506_TM_#01	antibiotic inactivation enzyme; APH(6)-Ic	streptomycin, aminoglycoside antibiotic	0000040, 0000016	3000557	3002659	5	0	0	0	0	0	0	0	0	0	0	0	0	0	0	0	0	0	0	0	0	0	0	0	0	0	0	0	0	0	0	260	662.362	0	0	0	0	0	0	0	0	0	0	0
RESF_300042_TM_#02	antibiotic inactivation enzyme; APH(6)-Id	streptomycin, aminoglycoside antibiotic	0000040, 0000016	3000557	3002660	5	288286	15436.5	7532	8306.79	332928	117982	650	58.7894	2433	347.387	2708	342.4	22961	3346.66	83	7.67036	4018	435.299	6	0.918699	7200	7574.36	2030	2575.91	10956	1388.77	23	13.8691	123	30.323	58630	28478.6	413	127.99	9	12.3177	10110	344.76	1107	116.272	2276	205.334	22067
RESF_300042_TM_#03	antibiotic inactivation enzyme; APH(6)-Id	streptomycin, aminoglycoside antibiotic	0000040, 0000016	3000557	3002660	5	127560	16471.9	2370	6584.16	128504	112729	297	63.9748	928	329.818	966	300.729	9866	3458.56	29	5.92804	1481	389.572	0	0	2654	6657.45	723	2231.09	6020	1866.26	57	88.1516	77	44.4573	23762	28336.3	226	172.277	0	0	3892	319.667	433	110.432	849	184.915	9273
RESF_300071_TM_#01	antibiotic inactivation enzyme; aphA15	neomycin, amikacin, netilmicin, streptomycin, kanamycin A, G418, aminoglycoside antibiotic	0000005, 0000013, 0000038, 0000040, 0000049, 3000653, 0000016	3000557	3004675	5	0	0	0	0	0	0	0	0	0	0	0	0	0	0	0	0	0	0	0	0	0	0	0	0	0	0	0	0	0	0	4	2.65359	0	0	0	0	0	0	0	0	0	0	0
RESF_300071_TM_#02	antibiotic inactivation enzyme; aphA15	neomycin, amikacin, netilmicin, streptomycin, kanamycin A, G418, aminoglycoside antibiotic	0000005, 0000013, 0000038, 0000040, 0000049, 3000653, 0000016	3000557	3004675	5	0	0	0	0	0	0	0	0	0	0	0	0	0	0	0	0	0	0	0	0	0	0	0	0	0	0	0	0	0	0	1	1.92385	0	0	0	0	0	0	0	0	0	0	0
NCBI_205468_TM_#05	antibiotic inactivation enzyme; apmA	apramycin, aminoglycoside antibiotic	0000037, 0000016	3000557	3003918	5	0	0	0	0	0	0	0	0	0	0	0	0	0	0	0	0	0	0	2	0.785998	0	0	0	0	0	0	0	0	0	0	0	0	0	0	0	0	0	0	0	0	0	0	0
NCBI_205468_TM_#07	antibiotic inactivation enzyme; apmA	apramycin, aminoglycoside antibiotic	0000037, 0000016	3000557	3003918	5	0	0	0	0	0	0	0	0	0	0	0	0	0	0	0	0	0	0	2	0.444905	0	0	0	0	11	2.12633	0	0	0	0	0	0	0	0	0	0	0	0	0	0	0	0	0
CARD_101840_TM_#01	antibiotic inactivation enzyme; arr-1	rifampin, rifaximin, rifabutin, rifapentine, rifamycin antibiotic	3000169, 3000517, 3000530, 3000534, 3000157	3000557	3002846	5	0	0	0	0	0	0	0	0	3	0.296241	0	0	0	0	0	0	0	0	0	0	0	0	0	0	0	0	0	0	0	0	0	0	0	0	0	0	0	0	2	0.172264	0	0	0
RESF_302847_TM_#01	antibiotic inactivation enzyme; arr-3	rifampin, rifaximin, rifabutin, rifapentine, rifamycin antibiotic	3000169, 3000517, 3000530, 3000534, 3000157	3000557	3002848	5	0	0	0	0	0	0	0	0	0	0	0	0	0	0	0	0	0	0	0	0	0	0	0	0	0	0	4	1.54343	0	0	0	0	0	0	0	0	0	0	0	0	0	0	0
CARD_100119_TM_#01	antibiotic inactivation enzyme; arr-8	rifampin, rifaximin, rifabutin, rifapentine, rifamycin antibiotic	3000169, 3000517, 3000530, 3000534, 3000157	3000557	3002853	5	0	0	0	0	0	0	0	0	0	0	0	0	0	0	0	0	0	0	0	0	0	0	0	0	0	0	0	0	34	6.02304	0	0	0	0	0	0	0	0	0	0	0	0	2
CARD_102406_TM_#02	antibiotic inactivation enzyme; Bacillus clausii chloramphenicol acetyltransferase	chloramphenicol, phenicol antibiotic	3000385, 3000387	3000557	3004452	4	0	0	0	0	0	0	0	0	0	0	0	0	0	0	0	0	0	0	0	0	0	0	0	0	0	0	0	0	0	0	0	0	0	0	0	0	0	0	0	0	0	0	1
RESF_302674_TM_#01	antibiotic inactivation enzyme; Bacillus pumilus cat86	azidamfenicol, chloramphenicol, thiamphenicol, phenicol antibiotic	3000382, 3000385, 3000456, 3000387	3000557	3002672	4	0	0	0	0	0	0	0	0	0	0	0	0	2	0.135557	0	0	0	0	0	0	0	0	0	0	0	0	0	0	0	0	0	0	0	0	0	0	1	0.0157382	6	0.271287	0	0	15
CARD_101259_TM_#03	antibiotic inactivation enzyme; BcI	cephalosporin, penam	0000032, 3000008	3000557	3002877	7	0	0	0	0	0	0	5	1.79267	27	12.6696	3	1.27926	2	1.96557	0	0	0	0	0	0	0	0	0	0	0	0	0	0	0	0	0	0	0	0	0	0	3	0.34552	3	1.06007	0	0	85
CARD_101259_TM_#04	antibiotic inactivation enzyme; BcI	cephalosporin, penam	0000032, 3000008	3000557	3002877	7	0	0	0	0	0	0	1	0.292613	21	12.4485	0	0	4	1.88695	0	0	0	0	0	0	0	0	0	0	0	0	0	0	0	0	0	0	0	0	0	0	6	1.59007	0	0	0	0	18
CARD_101259_TM_#08	antibiotic inactivation enzyme; BcI	cephalosporin, penam	0000032, 3000008	3000557	3002877	7	0	0	0	0	0	0	6	2.99263	23	13.6434	0	0	1	0.620708	0	0	2	2.60696	1	0.620525	4	17.7059	0	0	24	12.9411	0	0	0	0	0	0	0	0	0	0	0	0	0	0	0	0	80
CARD_101259_TM_#11	antibiotic inactivation enzyme; BcI	cephalosporin, penam	0000032, 3000008	3000557	3002877	7	0	0	0	0	0	0	12	2.92613	46	22.8237	10	3.41136	12	4.71738	0	0	0	0	0	0	0	0	0	0	0	0	71	109.957	3	2.00772	0	0	0	0	0	0	4	0.369275	0	0	0	0	76
CARD_101259_TM_#02	antibiotic inactivation enzyme; BcI	cephalosporin, penam	0000032, 3000008	3000557	3002877	7	0	0	0	0	0	0	0	0	4	7.3714	0	0	0	0	0	0	0	0	0	0	0	0	0	0	0	0	0	0	0	0	1	12.8257	0	0	0	0	0	0	0	0	0	0	16
NCBI_200051_TM_#07	antibiotic inactivation enzyme; BcII	cephalosporin, penam	0000032, 3000008	3000557	3002878	7	0	0	3	9.63621	0	0	8	2.37254	26	11.5872	2	0.758079	8	3.90619	0	0	0	0	0	0	0	0	0	0	0	0	0	0	0	0	0	0	0	0	0	0	9	1.39965	6	2.50102	0	0	148
NCBI_200051_TM_#02	antibiotic inactivation enzyme; BcII	cephalosporin, penam	0000032, 3000008	3000557	3002878	7	0	0	0	0	0	0	0	0	36	18.9651	1	0.409363	2	1.68478	0	0	0	0	0	0	0	0	0	0	0	0	0	0	2	1.60618	0	0	0	0	0	0	6	0.657227	0	0	0	0	72
CARD_102424_TM_#01	antibiotic inactivation enzyme; BIC-1	carbapenem	20	3000557	3004753	6	15	0.259655	0	0	0	0	0	0	0	0	0	0	0	0	0	0	0	0	0	0	0	0	0	0	0	0	0	0	0	0	0	0	1	0.0995557	0	0	0	0	0	0	0	0	0
CARD_101965_TM_#02	antibiotic inactivation enzyme; BJP-1	carbapenem	20	3000557	3000856	7	6	1.85527	0	0	0	0	0	0	2	1.62846	1	0.731005	4	3.36956	0	0	0	0	1	0.842141	12	115.778	0	0	68	89.8047	0	0	0	0	0	0	0	0	0	0	0	0	6	3.61755	0	0	0
CARD_101965_TM_#06	antibiotic inactivation enzyme; BJP-1	carbapenem	20	3000557	3000856	7	17	4.0719	0	0	0	0	1	0.406407	28	21.9881	7	3.99064	0	0	0	0	0	0	14	12.5579	10	46.812	0	0	100	74.2914	7	18.0567	0	0	0	0	0	0	0	0	4	0.631949	6	3.11103	0	0	0
CARD_101965_TM_#07	antibiotic inactivation enzyme; BJP-1	carbapenem	20	3000557	3000856	7	1	0.172457	0	0	31	35.6408	0	0	67	32.2537	10	4.24958	0	0	6	1.8035	2	0.69519	14	6.61513	52	197.522	0	0	72	32.3487	25	46.5067	9	7.27212	0	0	1	0.991574	0	0	2	0.219076	39	16.5182	3	0.870091	5
CARD_101965_TM_#08	antibiotic inactivation enzyme; BJP-1	carbapenem	20	3000557	3000856	7	4	0.556313	0	0	55	49.4501	5	1.17989	42	15.2779	9	2.97477	20	7.90132	3	0.726535	0	0	49	18.6924	35	94.9844	0	0	60	25.1351	40	59.9766	9	12.5721	8	9.92956	0	0	0	0	22	2.07125	40	12.5594	0	0	0
CARD_101965_TM_#12	antibiotic inactivation enzyme; BJP-1	carbapenem	20	3000557	3000856	7	5	1.07786	0	0	37	39.7081	0	0	27	15.8224	2	0.841156	5	2.50463	1	0.287709	0	0	30	14.5857	3	9.70419	0	0	22	8.84186	3	5.35747	2	1.5444	0	0	0	0	0	0	0	0	9	3.41511	0	0	0
CARD_101965_TM_#10	antibiotic inactivation enzyme; BJP-1	carbapenem	20	3000557	3000856	7	0	0	35	112.463	14	14.774	0	0	81	36.2747	14	5.30655	5	2.20581	7	2.14945	0	0	25	10.9166	39	122.421	0	0	104	39.5247	50	86.199	5	3.71801	0	0	6	5.50875	0	0	18	1.82943	50	17.5341	0	0	0
CARD_102444_TM_#04	antibiotic inactivation enzyme; BKC-1	carbapenem	20	3000557	3004757	6	0	0	0	0	0	0	2	0.064642	0	0	0	0	20	1.05018	0	0	0	0	0	0	0	0	0	0	0	0	32	6.81177	1	0.0933825	0	0	0	0	0	0	2	0.0250468	0	0	0	0	0
CARD_102708_TM_#01	antibiotic inactivation enzyme; blaS1	cefoxitin, carbenicillin, oxacillin, ceftriaxone, piperacillin, ampicillin, mezlocillin, cefixime, cephalosporin, penam	0000008, 0000043, 0000056, 0000062, 0000078, 3000637, 3000639, 3000646, 0000032, 3000008	3000557	3005111	6	0	0	0	0	0	0	0	0	0	0	0	0	2	0.0892316	0	0	0	0	0	0	0	0	0	0	0	0	27	4.72392	0	0	0	0	0	0	0	0	0	0	0	0	0	0	0
CARD_102455_TM_#01	antibiotic inactivation enzyme; BPU-1	penam	3000008	3000557	3004759	6	0	0	0	0	22	2.8356	0	0	0	0	0	0	11	0.562404	0	0	0	0	0	0	0	0	0	0	0	0	0	0	0	0	0	0	0	0	0	0	0	0	1	0.0390785	0	0	24
CARD_102345_TM_#03	antibiotic inactivation enzyme; BUT-1	cephalosporin	32	3000557	3004294	6	0	0	0	0	4	9.82742	0	0	557	564.229	0	0	0	0	4	2.54796	0	0	0	0	0	0	0	0	0	0	0	0	0	0	0	0	0	0	0	0	0	0	115	97.7313	54	37.9391	265
CARD_102345_TM_#01	antibiotic inactivation enzyme; BUT-1	cephalosporin	32	3000557	3004294	6	0	0	0	0	0	0	0	0	94	137.169	0	0	0	0	0	0	0	0	0	0	0	0	0	0	0	0	0	0	0	0	0	0	0	0	0	0	0	0	16	20.8924	3	4.33095	26
CARD_102345_TM_#02	antibiotic inactivation enzyme; BUT-1	cephalosporin	32	3000557	3004294	6	0	0	0	0	0	0	0	0	350	426.108	0	0	0	0	0	0	0	0	0	0	0	0	0	0	0	0	0	0	0	0	0	0	0	0	0	0	0	0	0	0	0	0	271
CARD_102345_TM_#04	antibiotic inactivation enzyme; BUT-1	cephalosporin	32	3000557	3004294	6	0	0	0	0	0	0	0	0	463	870.72	21	9.21066	13	6.75443	12	9.65633	0	0	0	0	0	0	0	0	0	0	0	0	0	0	0	0	0	0	0	0	136	17.8318	177	187.375	0	0	137
CARD_102345_TM_#05	antibiotic inactivation enzyme; BUT-1	cephalosporin	32	3000557	3004294	6	0	0	0	0	0	0	0	0	2055	337.064	0	0	0	0	7	0.681788	0	0	0	0	0	0	0	0	0	0	0	0	0	0	0	0	0	0	0	0	0	0	355	42.8905	36	3.87846	1364
CARD_102407_TM_#02	antibiotic inactivation enzyme; Campylobacter coli chloramphenicol acetyltransferase	chloramphenicol, phenicol antibiotic	3000385, 3000387	3000557	3004454	4	0	0	2	11.5635	0	0	0	0	0	0	0	0	0	0	0	0	0	0	0	0	2	11.2137	0	0	18	12.2941	0	0	0	0	0	0	0	0	0	0	0	0	0	0	0	0	0
CARD_102407_TM_#01	antibiotic inactivation enzyme; Campylobacter coli chloramphenicol acetyltransferase	chloramphenicol, phenicol antibiotic	3000385, 3000387	3000557	3004454	4	0	0	0	0	0	0	0	0	0	0	0	0	0	0	0	0	0	0	0	0	2	5.86844	0	0	69	24.3888	0	0	0	0	0	0	0	0	0	0	0	0	0	0	0	0	0
CARD_102407_TM_#06	antibiotic inactivation enzyme; Campylobacter coli chloramphenicol acetyltransferase	chloramphenicol, phenicol antibiotic	3000385, 3000387	3000557	3004454	4	0	0	0	0	0	0	0	0	0	0	0	0	0	0	0	0	0	0	0	0	1	16.8206	0	0	0	0	0	0	0	0	0	0	0	0	0	0	0	0	0	0	0	0	0
CARD_102407_TM_#05	antibiotic inactivation enzyme; Campylobacter coli chloramphenicol acetyltransferase	chloramphenicol, phenicol antibiotic	3000385, 3000387	3000557	3004454	4	0	0	0	0	0	0	0	0	0	0	0	0	0	0	0	0	0	0	0	0	0	0	0	0	4	2.85908	0	0	0	0	0	0	0	0	0	0	0	0	2	1.26614	0	0	0
CARD_100434_TM_#02	antibiotic inactivation enzyme; CARB beta-lactamase	penam	3000008	3000557	3000091	5	0	0	0	0	11	35.3319	0	0	0	0	0	0	0	0	0	0	0	0	0	0	0	0	0	0	0	0	7	19.1734	28	48.7651	14	33.0712	0	0	0	0	1	0.161085	0	0	0	0	0
CARD_100434_TM_#03	antibiotic inactivation enzyme; CARB beta-lactamase	penam	3000008	3000557	3000091	5	0	0	0	0	15	23.2036	0	0	0	0	0	0	0	0	0	0	0	0	0	0	0	0	0	0	0	0	16	41.321	43	50.9402	5	10.6881	0	0	0	0	0	0	0	0	0	0	0
CARD_100434_TM_#04	antibiotic inactivation enzyme; CARB beta-lactamase	penam	3000008	3000557	3000091	5	0	0	0	0	22	21.0035	0	0	0	0	0	0	0	0	0	0	0	0	0	0	10	29.0912	0	0	0	0	13	19.4712	127	95.2399	33	41.0134	0	0	0	0	0	0	0	0	0	0	0
RESF_300450_TM_#01	antibiotic inactivation enzyme; CARB-23	penam	3000008	3000557	3003186	6	0	0	0	0	0	0	0	0	0	0	0	0	0	0	0	0	0	0	0	0	0	0	0	0	83	40.4923	0	0	0	0	0	0	0	0	0	0	0	0	0	0	0	0	0
CARD_100313_TM_#01	antibiotic inactivation enzyme; CARB-23	penam	3000008	3000557	3003186	6	0	0	0	0	0	0	0	0	0	0	0	0	0	0	0	0	0	0	0	0	0	0	0	0	0	0	0	0	0	0	0	0	0	0	2	7.85743	221	23.5666	0	0	0	0	21
CARD_100313_TM_#06	antibiotic inactivation enzyme; CARB-23	penam	3000008	3000557	3003186	6	0	0	0	0	0	0	0	0	0	0	0	0	0	0	0	0	0	0	0	0	0	0	0	0	0	0	0	0	0	0	0	0	0	0	11	64.9417	372	59.5796	0	0	0	0	47
CARD_100313_TM_#08	antibiotic inactivation enzyme; CARB-23	penam	3000008	3000557	3003186	6	0	0	0	0	0	0	0	0	0	0	0	0	0	0	0	0	0	0	0	0	0	0	0	0	0	0	0	0	0	0	0	0	0	0	24	96.2431	457	51.986	0	0	0	0	94
RESF_300450_TM_#04	antibiotic inactivation enzyme; CARB-23	penam	3000008	3000557	3003186	6	0	0	0	0	0	0	0	0	0	0	0	0	0	0	0	0	0	0	0	0	0	0	0	0	0	0	0	0	0	0	0	0	0	0	2	2.01651	62	1.54969	0	0	0	0	24
CARD_101564_TM_#01	antibiotic inactivation enzyme; CARB-5	penam	3000008	3000557	3002244	6	32	11.8327	0	0	138	652.695	3	4.38919	0	0	2	4.09363	0	0	0	0	0	0	2687	4607.63	44	557.226	0	0	0	0	0	0	0	0	414	2700.56	1	4.95787	0	0	0	0	0	0	0	0	18
CARD_101564_TM_#02	antibiotic inactivation enzyme; CARB-5	penam	3000008	3000557	3002244	6	180	29.2878	8	22.4113	683	676.703	6	3.76217	0	0	130	52.3634	0	0	0	0	0	0	11587	5171.9	171	536.267	0	0	0	0	0	0	0	0	2785	3726.76	12	13.6527	0	0	0	0	0	0	0	0	8
CARD_101564_TM_#03	antibiotic inactivation enzyme; CARB-5	penam	3000008	3000557	3002244	6	437	33.4338	8	13.0907	1453	724.15	7	0.912927	0	0	219	39.2563	0	0	0	0	0	0	26812	5588.79	493	745.699	51	90.8153	0	0	0	0	0	0	5780	4048.51	37	15.9678	0	0	0	0	0	0	0	0	10
CARD_101564_TM_#04	antibiotic inactivation enzyme; CARB-5	penam	3000008	3000557	3002244	6	1090	59.9136	88	101.343	2708	994.018	14	1.32442	0	0	510	66.6446	0	0	2	0.16685	0	0	59739	9044.9	834	913.398	77	103.928	2	0.258279	0	0	0	0	11957	6018.58	60	19.1312	0	0	0	0	0	0	0	0	28
CARD_100736_TM_#03	antibiotic inactivation enzyme; CARB-9	penam	3000008	3000557	3002248	6	0	0	2	2.8591	22	9.53106	235	27.7187	0	0	0	0	0	0	0	0	0	0	0	0	28	37.011	0	0	0	0	310	234.288	1	0.346159	18	11.2249	0	0	0	0	317	14.1221	0	0	0	0	0
CARD_100736_TM_#04	antibiotic inactivation enzyme; CARB-9	penam	3000008	3000557	3002248	6	0	0	16	69.3807	34	40.0415	90	28.7803	0	0	0	0	0	0	0	0	0	0	0	0	4	14.0172	31	154.757	0	0	177	354.381	0	0	16	21.1497	0	0	0	0	173	20.6738	0	0	0	0	0
CARD_100736_TM_#01	antibiotic inactivation enzyme; CARB-9	penam	3000008	3000557	3002248	6	0	0	0	0	37	20.9324	127	18.6127	0	0	2	0.444959	0	0	0	0	0	0	0	0	4	7.3133	40	68.4072	0	0	205	180.789	0	0	14	11.7044	0	0	0	0	170	9.27502	0	0	0	0	0
CARD_100736_TM_#02	antibiotic inactivation enzyme; CARB-9	penam	3000008	3000557	3002248	6	0	0	0	0	0	0	99	36.4274	0	0	0	0	0	0	0	0	0	0	0	0	4	14.0172	27	179.965	0	0	85	171.756	0	0	10	18.5873	0	0	0	0	56	8.06815	0	0	0	0	0
NCBI_200190_TM_#01	antibiotic inactivation enzyme; catA8	chloramphenicol, phenicol antibiotic	3000385, 3000387	3000557	3004658	4	0	0	0	0	634	1551.28	31	14.3685	0	0	2	4.09363	0	0	0	0	0	0	0	0	0	0	0	0	0	0	0	0	0	0	0	0	3	4.13156	26	194.189	0	0	0	0	0	0	0
NCBI_200190_TM_#06	antibiotic inactivation enzyme; catA8	chloramphenicol, phenicol antibiotic	3000385, 3000387	3000557	3004658	4	0	0	0	0	1528	3457.09	20	12.7623	0	0	6	5.28573	0	0	0	0	0	0	0	0	7	85.6838	0	0	39	28.5398	0	0	0	0	0	0	4	7.08267	69	589.102	0	0	0	0	0	0	0
NCBI_200190_TM_#07	antibiotic inactivation enzyme; catA8	chloramphenicol, phenicol antibiotic	3000385, 3000387	3000557	3004658	4	0	0	0	0	9202	9063.35	129	35.9782	0	0	41	15.5274	0	0	0	0	0	0	0	0	15	38.2286	0	0	68	35.6165	0	0	0	0	0	0	79	70.6154	320	1398.44	0	0	0	0	0	0	0
CARD_100587_TM_#02	antibiotic inactivation enzyme; catB10	azidamfenicol, chloramphenicol, thiamphenicol, phenicol antibiotic	3000382, 3000385, 3000456, 3000387	3000557	3003110	4	0	0	0	0	0	0	0	0	0	0	0	0	2	0.208734	0	0	0	0	0	0	0	0	0	0	0	0	0	0	0	0	65	22.0538	0	0	0	0	2	0.0484681	0	0	0	0	0
CARD_100587_TM_#01	antibiotic inactivation enzyme; catB10	azidamfenicol, chloramphenicol, thiamphenicol, phenicol antibiotic	3000382, 3000385, 3000456, 3000387	3000557	3003110	4	0	0	0	0	0	0	0	0	0	0	0	0	0	0	0	0	0	0	0	0	0	0	0	0	0	0	0	0	0	0	2	12.4882	0	0	0	0	2	0.245234	0	0	0	0	0
NCBI_202101_TM_#01	antibiotic inactivation enzyme; catB8	azidamfenicol, chloramphenicol, thiamphenicol, phenicol antibiotic	3000382, 3000385, 3000456, 3000387	3000557	3002680	4	2	0.164768	0	0	0	0	0	0	0	0	0	0	4	1.24142	0	0	0	0	0	0	0	0	0	0	4	1.07374	0	0	3	1.58505	10	9.51675	0	0	0	0	0	0	2	0.422047	0	0	2
ARGA_401678_TM_#01	antibiotic inactivation enzyme; catB9	azidamfenicol, chloramphenicol, thiamphenicol, phenicol antibiotic	3000382, 3000385, 3000456, 3000387	3000557	3002681	4	221	5.99348	0	0	0	0	248	11.3587	33	2.28373	9	0.58491	222	16.2761	2	0.0929246	1081	58.8677	0	0	0	0	0	0	1109	71.4104	0	0	0	0	0	0	1483	230.954	2	1.38661	7794	133.761	402	21.085	120	5.41909	0
NCBI_205154_TM_#06	antibiotic inactivation enzyme; catI	azidamfenicol, chloramphenicol, thiamphenicol, phenicol antibiotic	3000382, 3000385, 3000456, 3000387	3000557	3002683	4	0	0	0	0	0	0	4	1.27223	0	0	2	0.889919	3107	1820.13	0	0	3	1.13346	0	0	0	0	0	0	0	0	0	0	0	0	1	1.67291	0	0	0	0	5461	752.406	74	28.9159	18	5.66291	22
NCBI_205154_TM_#01	antibiotic inactivation enzyme; catI	azidamfenicol, chloramphenicol, thiamphenicol, phenicol antibiotic	3000382, 3000385, 3000456, 3000387	3000557	3002683	4	0	0	0	0	0	0	0	0	0	0	10	2.93427	4365	1660.56	0	0	3	0.965541	0	0	0	0	0	0	0	0	0	0	0	0	20	28.4841	0	0	0	0	7700	687.239	81	23.4	0	0	51
NCBI_205154_TM_#03	antibiotic inactivation enzyme; catI	azidamfenicol, chloramphenicol, thiamphenicol, phenicol antibiotic	3000382, 3000385, 3000456, 3000387	3000557	3002683	4	0	0	0	0	0	0	0	0	0	0	4	2.40802	2252	2200.37	0	0	3	1.53351	0	0	0	0	0	0	0	0	0	0	0	0	1	2.26336	0	0	0	0	3265	626.148	61	33.2332	0	0	34
NCBI_205325_TM_#01	antibiotic inactivation enzyme; catII	azidamfenicol, chloramphenicol, thiamphenicol, phenicol antibiotic	3000382, 3000385, 3000456, 3000387	3000557	3002684	4	0	0	0	0	0	0	0	0	10	3.51933	0	0	44	18.3427	0	0	0	0	0	0	0	0	0	0	0	0	0	0	0	0	0	0	2	3.30525	0	0	144	13.2816	0	0	0	0	207
NCBI_205325_TM_#02	antibiotic inactivation enzyme; catII	azidamfenicol, chloramphenicol, thiamphenicol, phenicol antibiotic	3000382, 3000385, 3000456, 3000387	3000557	3002684	4	0	0	0	0	0	0	0	0	2	0.726572	0	0	62	25.7322	0	0	0	0	0	0	0	0	0	0	0	0	0	0	0	0	0	0	2	1.8592	1	3.67525	253	24.7005	0	0	0	0	368
NCBI_205325_TM_#06	antibiotic inactivation enzyme; catII	azidamfenicol, chloramphenicol, thiamphenicol, phenicol antibiotic	3000382, 3000385, 3000456, 3000387	3000557	3002684	4	0	0	0	0	0	0	0	0	4	3.07142	0	0	69	45.7572	0	0	0	0	0	0	0	0	11	54.9429	0	0	0	0	0	0	0	0	0	0	0	0	130	20.644	0	0	0	0	353
NCBI_205325_TM_#08	antibiotic inactivation enzyme; catII	azidamfenicol, chloramphenicol, thiamphenicol, phenicol antibiotic	3000382, 3000385, 3000456, 3000387	3000557	3002684	4	0	0	0	0	0	0	0	0	0	0	0	0	45	40.5445	0	0	0	0	0	0	5	19.1143	11	49.9481	0	0	0	0	0	0	0	0	0	0	0	0	16	2.12496	0	0	0	0	218
CARD_101483_TM_#01	antibiotic inactivation enzyme; catIII	azidamfenicol, chloramphenicol, thiamphenicol, phenicol antibiotic	3000382, 3000385, 3000456, 3000387	3000557	3002685	4	0	0	7	3.89155	0	0	0	0	0	0	0	0	0	0	0	0	0	0	0	0	0	0	0	0	0	0	0	0	0	0	0	0	0	0	0	0	0	0	0	0	0	0	0
NCBI_200210_TM_#01	antibiotic inactivation enzyme; catP	azidamfenicol, chloramphenicol, thiamphenicol, phenicol antibiotic	3000382, 3000385, 3000456, 3000387	3000557	3002686	4	0	0	0	0	0	0	9	0.531968	0	0	0	0	0	0	0	0	0	0	0	0	320	213.708	0	0	0	0	0	0	0	0	0	0	0	0	0	0	0	0	0	0	0	0	0
NCBI_200210_TM_#02	antibiotic inactivation enzyme; catP	azidamfenicol, chloramphenicol, thiamphenicol, phenicol antibiotic	3000382, 3000385, 3000456, 3000387	3000557	3002686	4	0	0	0	0	0	0	3	1.72125	0	0	0	0	0	0	0	0	0	0	0	0	31	157.06	0	0	0	0	0	0	0	0	0	0	0	0	0	0	0	0	0	0	0	0	0
CARD_101536_TM_#01	antibiotic inactivation enzyme; catQ	azidamfenicol, chloramphenicol, thiamphenicol, phenicol antibiotic	3000382, 3000385, 3000456, 3000387	3000557	3002687	4	0	0	0	0	0	0	0	0	6	3.97477	0	0	3	2.0812	0	0	0	0	102	103.694	0	0	0	0	0	0	0	0	2	2.36203	0	0	0	0	0	0	6	0.96651	0	0	0	0	0
CARD_101536_TM_#04	antibiotic inactivation enzyme; catQ	azidamfenicol, chloramphenicol, thiamphenicol, phenicol antibiotic	3000382, 3000385, 3000456, 3000387	3000557	3002687	4	0	0	0	0	0	0	0	0	0	0	0	0	1	0.842389	0	0	0	0	209	234.797	0	0	0	0	0	0	0	0	4	5.73635	0	0	2	3.54134	0	0	0	0	13	7.83802	0	0	2
CARD_101536_TM_#05	antibiotic inactivation enzyme; catQ	azidamfenicol, chloramphenicol, thiamphenicol, phenicol antibiotic	3000382, 3000385, 3000456, 3000387	3000557	3002687	4	0	0	0	0	0	0	0	0	0	0	0	0	19	12.2439	0	0	0	0	171	104.987	0	0	0	0	2	0.633714	0	0	0	0	0	0	0	0	0	0	8	0.835629	0	0	0	0	22
CARD_101536_TM_#02	antibiotic inactivation enzyme; catQ	azidamfenicol, chloramphenicol, thiamphenicol, phenicol antibiotic	3000382, 3000385, 3000456, 3000387	3000557	3002687	4	0	0	0	0	0	0	0	0	0	0	0	0	0	0	0	0	0	0	189	178.616	0	0	0	0	0	0	0	0	5	5.57701	0	0	0	0	0	0	0	0	0	0	0	0	9
CARD_100985_TM_#01	antibiotic inactivation enzyme; catS	azidamfenicol, chloramphenicol, thiamphenicol, phenicol antibiotic	3000382, 3000385, 3000456, 3000387	3000557	3002688	4	0	0	0	0	0	0	0	0	0	0	374	31.4906	0	0	0	0	0	0	0	0	2	1.4135	0	0	0	0	5	1.9509	0	0	0	0	0	0	0	0	0	0	0	0	0	0	0
CARD_102158_TM_#01	antibiotic inactivation enzyme; CatU	azidamfenicol, chloramphenicol, thiamphenicol, phenicol antibiotic	3000382, 3000385, 3000456, 3000387	3000557	3003983	4	0	0	0	0	0	0	0	0	0	0	0	0	0	0	0	0	0	0	0	0	0	0	0	0	0	0	0	0	0	0	0	0	0	0	0	0	0	0	0	0	0	0	4
CARD_102388_TM_#01	antibiotic inactivation enzyme; catV	chloramphenicol, phenicol antibiotic	3000385, 3000387	3000557	3004357	4	0	0	0	0	0	0	0	0	0	0	0	0	0	0	0	0	0	0	6	0.406551	0	0	0	0	0	0	0	0	0	0	0	0	0	0	0	0	0	0	0	0	0	0	0
CARD_101040_TM_#01	antibiotic inactivation enzyme; CAU-1	carbapenem, penam	0000020, 3000008	3000557	3000855	7	0	0	0	0	0	0	0	0	0	0	0	0	31	16.5122	0	0	0	0	0	0	0	0	0	0	0	0	0	0	0	0	0	0	2	1.63446	0	0	0	0	0	0	45	11.3932	0
CARD_101040_TM_#02	antibiotic inactivation enzyme; CAU-1	carbapenem, penam	0000020, 3000008	3000557	3000855	7	0	0	0	0	0	0	0	0	0	0	0	0	1	0.453594	0	0	0	0	0	0	0	0	0	0	0	0	0	0	0	0	0	0	0	0	0	0	0	0	0	0	29	8.19054	0
CARD_101040_TM_#03	antibiotic inactivation enzyme; CAU-1	carbapenem, penam	0000020, 3000008	3000557	3000855	7	0	0	0	0	0	0	0	0	0	0	0	0	95	7.22229	0	0	30	1.57445	0	0	0	0	0	0	0	0	0	0	2	0.242381	0	0	35	5.66378	0	0	0	0	0	0	120	5.61501	0
CARD_100001_TM_#02	antibiotic inactivation enzyme; CblA-1	cephaloridine, cephalosporin	3004129, 0000032	3000557	3002999	6	0	0	0	0	0	0	0	0	0	0	0	0	0	0	0	0	0	0	0	0	0	0	0	0	0	0	0	0	0	0	0	0	0	0	0	0	2	0.0472146	0	0	0	0	0
CARD_100279_TM_#04	antibiotic inactivation enzyme; CepS	cephalosporin	32	3000557	3003553	6	593	139.356	0	0	190	248.804	58	19.0486	771	442.997	65	32.5595	66	39.3484	176	71.1792	3425	1589.89	62	34.3236	6	21.9399	0	0	3239	1783.72	0	0	0	0	9	15.9079	925	1153.13	6	29.7216	583	91.6816	1272	598.488	508	195.515	895
CARD_100279_TM_#06	antibiotic inactivation enzyme; CepS	cephalosporin	32	3000557	3003553	6	1576	281.82	0	0	357	347.984	5447	1536.63	7603	3253.02	305	125.649	25	10.1762	250	73.0022	5817	1953.53	428	190.413	25	99.6945	2773	10948.4	16703	6443.97	0	0	832	642.288	1439	2040.05	12978	12559.8	65	283.458	7501	800.259	2959	1029.36	852	249.874	1848
CARD_100279_TM_#07	antibiotic inactivation enzyme; CepS	cephalosporin	32	3000557	3003553	6	229	41.9844	0	0	0	0	21	10.1075	1665	785.874	225	101.276	33	14.8742	11	3.1733	406	154.439	11	5.82232	0	0	0	0	1615	764.969	0	0	19	19.4748	2	4.43966	1006	1083.19	0	0	7423	916.653	152	56.8287	56	15.1062	407
CARD_100279_TM_#09	antibiotic inactivation enzyme; CepS	cephalosporin	32	3000557	3003553	6	362	74.1422	0	0	123	176.074	31	9.533	1948	979.981	116	53.9923	91	54.2801	133	47.6523	3511	1433.91	65	44.8648	3	10.0924	116	463.842	2691	1263.46	10	18.5726	0	0	7	13.0122	1269	1499.17	8	36.4585	12725	1644.9	1597	662.639	613	231.412	1479
CARD_100279_TM_#14	antibiotic inactivation enzyme; CepS	cephalosporin	32	3000557	3003553	6	1943	434.023	0	0	1068	1412.63	6779	2490.75	4062	2160.7	427	238.519	316	207.723	276	94.3634	3502	1481.06	289	149.131	64	301.13	2159	10059.5	35189	18346.9	0	0	3785	3833.42	1875	3285.19	12042	14718.7	83	559.125	13614	1882.25	2418	1015.39	429	165.623	1859
CARD_100279_TM_#10	antibiotic inactivation enzyme; CepS	cephalosporin	32	3000557	3003553	6	0	0	8	26.6849	0	0	1	0.281359	199	103.104	22	9.27418	15	6.80391	14	4.02792	5	1.67113	5	2.27319	0	0	0	0	52	20.5003	0	0	0	0	0	0	20	27.4113	7	31.1355	4352	532.605	183	71.4215	0	0	438
CARD_100279_TM_#01	antibiotic inactivation enzyme; CepS	cephalosporin	32	3000557	3003553	6	0	0	0	0	0	0	12	3.86782	155	83.2414	4	1.51616	0	0	0	0	19	6.12726	0	0	0	0	0	0	16	8.96183	0	0	0	0	0	0	7	8.62285	3	12.6592	501	64.3779	149	54.9289	0	0	259
CARD_100279_TM_#03	antibiotic inactivation enzyme; CepS	cephalosporin	32	3000557	3003553	6	0	0	0	0	0	0	4	2.12809	72	39.9363	8	5.71204	6	3.35473	0	0	4	1.57998	0	0	0	0	0	0	8	3.72547	0	0	0	0	0	0	2	2.25358	0	0	301	39.4258	68	40.1113	27	8.85876	126
CARD_100249_TM_#04	antibiotic inactivation enzyme; CfxA2	cephamycin	44	3000557	3003002	6	1	0.15398	0	0	0	0	7	1.82883	0	0	168	76.8602	18	13.6999	2	0.73578	0	0	0	0	767	2677.84	0	0	1394	562.358	61	125.572	0	0	105	160.738	70	76.8035	13	52.9464	0	0	100	33.7049	0	0	0
CARD_100249_TM_#05	antibiotic inactivation enzyme; CfxA2	cephamycin	44	3000557	3003002	6	0	0	0	0	0	0	0	0	0	0	12	8.50315	0	0	0	0	0	0	0	0	12	67.3759	0	0	0	0	54	192.963	0	0	0	0	4	6.07086	0	0	0	0	6	3.50793	0	0	0
CARD_100249_TM_#11	antibiotic inactivation enzyme; CfxA2	cephamycin	44	3000557	3003002	6	0	0	0	0	0	0	0	0	0	0	2	1.27926	0	0	0	0	0	0	0	0	0	0	0	0	0	0	0	0	0	0	0	0	0	0	0	0	0	0	0	0	0	0	0
CARD_102436_TM_#01	antibiotic inactivation enzyme; CGA-1	penam	3000008	3000557	3004766	6	0	0	0	0	0	0	0	0	0	0	0	0	15	0.707646	0	0	0	0	0	0	0	0	0	0	0	0	0	0	0	0	0	0	0	0	0	0	32	0.348583	1	0.0341739	2	0.0562461	0
CARD_100820_TM_#01	antibiotic inactivation enzyme; CGB-1	carbapenem, cephalosporin, penam	0000020, 0000032, 3000008	3000557	3000841	7	0	0	0	0	0	0	0	0	0	0	0	0	272	16.0265	0	0	0	0	0	0	0	0	0	0	0	0	0	0	0	0	0	0	0	0	0	0	139	1.89076	0	0	0	0	2
CARD_102128_TM_#02	antibiotic inactivation enzyme; chloramphenicol acetyltransferase (CAT)	phenicol antibiotic	3000387	3000557	3000122	3	5	2.15571	64	767.538	9	25.4577	0	0	8	9.00949	0	0	4	4.71738	0	0	0	0	0	0	117	1110.51	3	29.9689	80	82.0664	28	130.488	0	0	0	0	84	229.756	0	0	153	44.527	0	0	0	0	41
CARD_102128_TM_#06	antibiotic inactivation enzyme; chloramphenicol acetyltransferase (CAT)	phenicol antibiotic	3000387	3000557	3000122	3	0	0	0	0	1	0.870136	0	0	0	0	0	0	2	0.73709	0	0	0	0	0	0	0	0	4	12.487	0	0	11	15.9761	0	0	5	6.01204	0	0	0	0	14	1.21335	0	0	3	0.676711	3
NCBI_205236_TM_#05	antibiotic inactivation enzyme; chloramphenicol acetyltransferase (CAT)	phenicol antibiotic	3000387	3000557	3000122	3	0	0	0	0	3390	3781.68	54	16.4855	0	0	11	5.73097	0	0	0	0	0	0	0	0	12	60.6536	0	0	130	60.1937	0	0	0	0	0	0	15	13.4778	140	643.609	0	0	0	0	0	0	0
CARD_102094_TM_#09	antibiotic inactivation enzyme; class C beta-lactamase	antibiotic molecule	1000003	3000557	3000076	4	47	7.35083	0	0	0	0	0	0	0	0	0	0	0	0	0	0	1	0.280318	0	0	0	0	0	0	0	0	0	0	0	0	0	0	0	0	0	0	5429	560.226	0	0	0	0	12
CARD_102094_TM_#06	antibiotic inactivation enzyme; class C beta-lactamase	antibiotic molecule	1000003	3000557	3000076	4	0	0	0	0	0	0	2	0.188377	348	64.1887	0	0	27	5.18501	2	0.249348	80	10.9388	0	0	0	0	0	0	3	0.512252	0	0	0	0	0	0	72	29.0906	0	0	13884	599.325	99	13.2919	12	1.3749	186
CARD_102094_TM_#02	antibiotic inactivation enzyme; class C beta-lactamase	antibiotic molecule	1000003	3000557	3000076	4	0	0	0	0	0	0	0	0	107	48.4902	15	7.31005	0	0	0	0	22	11.5575	0	0	0	0	0	0	0	0	0	0	0	0	0	0	19	26.2098	0	0	2656	349.307	0	0	0	0	2
CARD_102094_TM_#04	antibiotic inactivation enzyme; class C beta-lactamase	antibiotic molecule	1000003	3000557	3000076	4	0	0	0	0	0	0	0	0	163	95.8886	0	0	0	0	0	0	6	4.80499	0	0	0	0	0	0	0	0	0	0	0	0	0	0	29	37.0924	0	0	1445	284.31	3	1.26614	0	0	0
CARD_102094_TM_#05	antibiotic inactivation enzyme; class C beta-lactamase	antibiotic molecule	1000003	3000557	3000076	4	0	0	0	0	0	0	0	0	17	14.7726	0	0	0	0	1	0.575418	0	0	0	0	0	0	0	0	0	0	0	0	0	0	0	0	11	26.6896	1	8.76406	1129	324.995	5	3.24652	0	0	11
CARD_100612_TM_#01	antibiotic inactivation enzyme; Clostridium butyricum catB	azidamfenicol, chloramphenicol, thiamphenicol, phenicol antibiotic	3000382, 3000385, 3000456, 3000387	3000557	3002674	4	0	0	0	0	0	0	0	0	0	0	0	0	0	0	0	0	0	0	0	0	15	7.02935	0	0	0	0	0	0	0	0	0	0	0	0	0	0	0	0	0	0	0	0	0
CARD_100662_TM_#01	antibiotic inactivation enzyme; cmlv	chloramphenicol, phenicol antibiotic	3000385, 3000387	3000557	3002700	4	0	0	0	0	0	0	0	0	4	0.174828	0	0	0	0	2	0.05867	0	0	0	0	0	0	0	0	0	0	0	0	0	0	0	0	0	0	0	0	0	0	2	0.0637053	0	0	0
CARD_101734_TM_#02	antibiotic inactivation enzyme; CMY beta-lactamase	cephamycin	44	3000557	3000069	7	20	8.59504	0	0	0	0	60	56.4664	115	239.532	400	574.835	1310	2309.04	14	9.96774	2	3.47595	0	0	1	16.8206	0	0	0	0	0	0	0	0	0	0	0	0	67	1442.28	4507	2282.16	49	68.0834	0	0	875
CARD_101734_TM_#04	antibiotic inactivation enzyme; CMY beta-lactamase	cephamycin	44	3000557	3000069	7	10	3.71262	0	0	0	0	101	65.1884	140	162.57	629	700.059	1484	1922.84	15	9.60829	27	27.2189	15	18.6149	0	0	0	0	1	0.878147	0	0	21	49.7002	0	0	28	77.6893	55	527.318	8114	2214.51	98	82.3838	14	9.9882	2017
CARD_101734_TM_#13	antibiotic inactivation enzyme; CMY beta-lactamase	cephamycin	44	3000557	3000069	7	113	23.5345	0	0	138	156.677	648	228.726	1306	635.339	3493	1701.1	4158	2248.19	993	320.912	686	289.872	7	3.18011	38	125.615	21	80.7852	523	207.916	0	0	3150	3060.97	5	7.39943	55	58.7081	156	775.343	67894	8469.57	2176	853.528	12235	4021.68	11328
CARD_101734_TM_#15	antibiotic inactivation enzyme; CMY beta-lactamase	cephamycin	44	3000557	3000069	7	2	1.23184	0	0	0	0	66	70.5693	140	226.186	474	666.908	1328	2279.59	9	9.6177	3	3.72423	2	3.36856	1	12.6154	0	0	0	0	0	0	26	35.3882	0	0	6	21.248	49	785.594	6373	2549.45	38	39.9001	16	15.3388	862
CARD_101734_TM_#01	antibiotic inactivation enzyme; CMY beta-lactamase	cephamycin	44	3000557	3000069	7	0	0	0	0	0	0	0	0	140	53.1321	0	0	295	128.177	0	0	4	1.97193	0	0	0	0	0	0	0	0	0	0	0	0	0	0	0	0	0	0	471	48.4895	0	0	0	0	11
CARD_101734_TM_#10	antibiotic inactivation enzyme; CMY beta-lactamase	cephamycin	44	3000557	3000069	7	0	0	0	0	0	0	0	0	2	1.53571	52	33.7917	91	69.6232	0	0	0	0	0	0	0	0	0	0	0	0	0	0	0	0	0	0	0	0	0	0	982	178.578	4	2.59721	0	0	93
CARD_100250_TM_#03	antibiotic inactivation enzyme; CMY-1	cephamycin	44	3000557	3002012	8	26	6.24031	0	0	0	0	16	5.68806	1883	1165.37	146	85.191	12	7.67011	75	30.9937	495	297.377	21	11.799	3	12.0147	1	4.75696	1463	972.241	0	0	0	0	20	36.7039	413	666.502	9	92.2313	8504	1336.91	281	153.202	45	18.3992	708
CARD_100250_TM_#09	antibiotic inactivation enzyme; CMY-1	cephamycin	44	3000557	3002012	8	15	2.10472	4	11.1904	0	0	15	5.53328	63	23.975	22	7.47106	51	23.0381	0	0	2	0.560637	0	0	0	0	60	193.488	474	158.537	0	0	0	0	0	0	9	10.5119	8	39.6288	19027	1985.05	59	17.6914	0	0	774
CARD_100394_TM_#01	antibiotic inactivation enzyme; CMY-1	cephamycin	44	3000557	3002012	8	905	153.697	0	0	165	159.357	291	94.866	7151	3214.18	383	171.036	791	392.649	280	82.0865	6159	2193.02	507	249.36	3	8.70031	182	651.675	6233	2693.69	0	0	0	0	155	268.519	6984	7013.23	3	11.7861	11772	1321.62	3493	1245.85	847	239.97	2092
CARD_100394_TM_#02	antibiotic inactivation enzyme; CMY-1	cephamycin	44	3000557	3002012	8	1101	266.86	0	0	415	530.832	2875	1193.05	3511	1987.89	133	68.352	61	36.7846	192	77.1127	3788	1755.42	210	117.648	49	180.469	1503	7850.1	19580	10711.7	0	0	1586	1655.78	901	1599.79	7156	9330.45	8	47.1583	250	34.6951	1606	758.221	627	246.03	907
CARD_100394_TM_#06	antibiotic inactivation enzyme; CMY-1	cephamycin	44	3000557	3002012	8	1256	209.627	0	0	494	524.166	6449	1845.54	3467	1433.36	42	15.9282	3	1.20615	62	17.5588	1202	391.711	270	122.06	25	74.8917	2456	9066.63	19507	7607.46	8	12.3817	2178	1662.61	1330	1834.16	12538	11925.1	35	174.051	9	1.02108	535	185.193	138	36.525	529
CARD_100394_TM_#12	antibiotic inactivation enzyme; CMY-1	cephamycin	44	3000557	3002012	8	190	46.0987	0	0	0	0	589	261.051	2186	1666.63	23	11.2524	14	8.00184	31	17.1192	545	302.727	229	165.158	0	0	1063	6796.67	1002	669.497	0	0	14	20.5553	54	128.765	4205	6663.69	0	0	0	0	473	229.431	161	65.3211	552
CARD_100250_TM_#05	antibiotic inactivation enzyme; CMY-1	cephamycin	44	3000557	3002012	8	0	0	6	22.6242	0	0	0	0	0	0	12	6.03061	33	17.2347	1	0.325236	0	0	0	0	0	0	0	0	0	0	0	0	0	0	0	0	0	0	0	0	5998	885.681	22	8.18864	0	0	352
CARD_100250_TM_#06	antibiotic inactivation enzyme; CMY-1	cephamycin	44	3000557	3002012	8	0	0	0	0	0	0	2	2.3101	9	4.66838	7	3.16164	6	2.72156	0	0	0	0	0	0	0	0	0	0	0	0	0	0	0	0	0	0	1	0.965819	0	0	1405	166.452	36	12.8229	0	0	235
CARD_100250_TM_#04	antibiotic inactivation enzyme; CMY-1	cephamycin	44	3000557	3002012	8	0	0	0	0	0	0	0	0	0	0	1	0.538635	24	15.6383	0	0	0	0	0	0	0	0	0	0	0	0	0	0	0	0	0	0	0	0	0	0	918	157.526	1	0.452194	0	0	16
CARD_100250_TM_#08	antibiotic inactivation enzyme; CMY-1	cephamycin	44	3000557	3002012	8	0	0	0	0	0	0	0	0	0	0	2	0.93037	27	16.8602	0	0	0	0	0	0	0	0	0	0	0	0	0	0	0	0	0	0	0	0	0	0	1303	188.377	0	0	0	0	66
CARD_100258_TM_#04	antibiotic inactivation enzyme; CphA beta-lactamase	carbapenem	20	3000557	3000581	6	2004	347.339	0	0	912	935.891	11335	3396.18	9306	3979.06	469	186.151	16470	8093.23	278	81.7234	4486	1537.7	3475	1700.81	95	284.482	1439	5271.68	43406	17978.8	0	0	4891	3991.24	3127	4636.75	33347	34152	107	502.701	20905	2304.09	7935	2816.1	643	204.522	6434
CARD_100258_TM_#06	antibiotic inactivation enzyme; CphA beta-lactamase	carbapenem	20	3000557	3000581	6	1296	421.78	0	0	661	1033.96	5950	3401.19	5232	3979.27	284	182.028	6634	5696.16	222	116.172	2086	1347.31	1777	1552.62	45	257.51	1532	10186.7	26300	18000.9	0	0	2992	4816.69	1786	4979.28	18590	35612.8	33	248.782	10449	2205.24	4206	2852.1	488	198.24	3879
CARD_101999_TM_#01	antibiotic inactivation enzyme; CPS-1	carbapenem	20	3000557	3003716	7	0	0	0	0	154	17.4811	0	0	54	2.45154	0	0	229	10.9013	0	0	598	20.8912	0	0	5	1.71639	0	0	0	0	0	0	0	0	16	2.45593	9	0.89849	0	0	2	0.0223547	4666	158.608	17414	506.843	118
CARD_102417_TM_#01	antibiotic inactivation enzyme; CrpP	ciprofloxacin, fluoroquinolone antibiotic	0000036, 0000001	3000557	3004468	4	0	0	0	0	0	0	0	0	0	0	0	0	0	0	0	0	0	0	0	0	0	0	0	0	0	0	0	0	0	0	0	0	0	0	0	0	451	56.4161	0	0	0	0	0
RESF_302007_TM_#03	antibiotic inactivation enzyme; CTX-M beta-lactamase	cephalosporin	32	3000557	3000016	5	2	1.72457	0	0	0	0	0	0	105	185.915	48	86.3783	10	17.4626	0	0	8	15.5081	0	0	0	0	0	0	0	0	0	0	0	0	0	0	0	0	2	45.5731	31	15.7767	0	0	39	39.4446	12
CARD_101086_TM_#02	antibiotic inactivation enzyme; CTX-M beta-lactamase	cephalosporin	32	3000557	3000016	5	27	4.84483	0	0	61	57.7439	27	6.76387	6061	2440.61	2125	837.049	0	0	1841	505.189	591	195.087	0	0	59	183.494	7	23.3091	83	28.3561	3	4.64314	121	102.204	0	0	8	6.6105	0	0	37	3.69204	1488	465.58	1249	332.952	626
CARD_101086_TM_#05	antibiotic inactivation enzyme; CTX-M beta-lactamase	cephalosporin	32	3000557	3000016	5	1	0.15398	0	0	16	15.923	25	6.53469	86	37.0676	17	6.21354	2	0.842389	77	20.5841	32	9.95408	295	124.297	9	27.0331	0	0	0	0	0	0	166	119.09	0	0	1	0.885334	0	0	22	2.15164	34	11.0698	809	208.634	612
RESF_302007_TM_#08	antibiotic inactivation enzyme; CTX-M beta-lactamase	cephalosporin	32	3000557	3000016	5	0	0	0	0	0	0	0	0	4	3.18592	8	5.13064	0	0	0	0	0	0	0	0	0	0	0	0	0	0	37	107.434	0	0	0	0	0	0	0	0	0	0	6	3.17658	0	0	37
RESF_302007_TM_#09	antibiotic inactivation enzyme; CTX-M beta-lactamase	cephalosporin	32	3000557	3000016	5	0	0	0	0	0	0	0	0	8	6.45497	11	8.04105	7	5.89672	0	0	0	0	0	0	0	0	0	0	0	0	0	0	0	0	0	0	0	0	0	0	0	0	1	0.602925	8	4.15049	18
RESF_302007_TM_#10	antibiotic inactivation enzyme; CTX-M beta-lactamase	cephalosporin	32	3000557	3000016	5	0	0	0	0	0	0	0	0	15	8.04419	29	23.7311	0	0	0	0	0	0	0	0	0	0	0	0	0	0	20	85.4927	0	0	0	0	0	0	0	0	90	108.008	0	0	0	0	32
CARD_101086_TM_#01	antibiotic inactivation enzyme; CTX-M beta-lactamase	cephalosporin	32	3000557	3000016	5	0	0	0	0	0	0	0	0	4	3.07142	4	2.72908	0	0	0	0	0	0	0	0	0	0	0	0	0	0	0	0	0	0	0	0	0	0	0	0	0	0	4	1.77704	0	0	0
CARD_101086_TM_#06	antibiotic inactivation enzyme; CTX-M beta-lactamase	cephalosporin	32	3000557	3000016	5	0	0	0	0	0	0	0	0	36	20.7271	0	0	0	0	0	0	0	0	0	0	0	0	0	0	0	0	0	0	0	0	0	0	0	0	0	0	23	3.15385	0	0	0	0	443
CARD_101086_TM_#09	antibiotic inactivation enzyme; CTX-M beta-lactamase	cephalosporin	32	3000557	3000016	5	0	0	0	0	0	0	0	0	67	25.1058	0	0	2	0.842389	0	0	0	0	0	0	0	0	0	0	0	0	0	0	0	0	0	0	0	0	0	0	56	4.94747	0	0	0	0	0
CARD_101210_TM_#01	antibiotic inactivation enzyme; CTX-M beta-lactamase	cephalosporin	32	3000557	3000016	5	0	0	0	0	0	0	0	0	0	0	0	0	0	0	0	0	0	0	0	0	0	0	0	0	1	0.238257	0	0	0	0	0	0	0	0	0	0	10	0.804643	0	0	0	0	0
CARD_101210_TM_#02	antibiotic inactivation enzyme; CTX-M beta-lactamase	cephalosporin	32	3000557	3000016	5	0	0	0	0	0	0	0	0	0	0	0	0	0	0	0	0	0	0	0	0	0	0	0	0	0	0	0	0	0	0	0	0	0	0	0	0	3	0.375339	0	0	0	0	0
CARD_101210_TM_#06	antibiotic inactivation enzyme; CTX-M beta-lactamase	cephalosporin	32	3000557	3000016	5	0	0	0	0	0	0	0	0	0	0	0	0	0	0	0	0	0	0	0	0	0	0	0	0	0	0	0	0	0	0	0	0	0	0	0	0	6	0.912815	0	0	0	0	0
CARD_101551_TM_#04	antibiotic inactivation enzyme; CTX-M-56	cephalosporin	32	3000557	3001918	6	0	0	0	0	0	0	0	0	6	2.70285	0	0	0	0	0	0	0	0	0	0	0	0	0	0	0	0	0	0	0	0	0	0	0	0	0	0	0	0	0	0	0	0	495
CARD_101551_TM_#05	antibiotic inactivation enzyme; CTX-M-56	cephalosporin	32	3000557	3001918	6	0	0	0	0	0	0	0	0	7	8.75923	0	0	0	0	0	0	0	0	0	0	0	0	0	0	0	0	0	0	0	0	0	0	0	0	0	0	1	0.391206	0	0	0	0	176
CARD_101551_TM_#03	antibiotic inactivation enzyme; CTX-M-56	cephalosporin	32	3000557	3001918	6	0	0	0	0	0	0	0	0	0	0	0	0	0	0	0	0	0	0	0	0	0	0	0	0	0	0	0	0	0	0	0	0	0	0	0	0	6	2.6904	0	0	0	0	197
CARD_101551_TM_#06	antibiotic inactivation enzyme; CTX-M-56	cephalosporin	32	3000557	3001918	6	0	0	0	0	0	0	0	0	0	0	0	0	0	0	0	0	0	0	0	0	0	0	0	0	0	0	0	0	0	0	0	0	0	0	0	0	0	0	0	0	0	0	40
CARD_101551_TM_#10	antibiotic inactivation enzyme; CTX-M-56	cephalosporin	32	3000557	3001918	6	0	0	0	0	0	0	0	0	0	0	0	0	0	0	0	0	0	0	0	0	0	0	0	0	0	0	0	0	0	0	0	0	0	0	0	0	0	0	0	0	0	0	794
CARD_102554_TM_#01	antibiotic inactivation enzyme; DES-1	penam	3000008	3000557	3004780	6	0	0	0	0	0	0	0	0	0	0	0	0	0	0	0	0	0	0	0	0	0	0	0	0	0	0	0	0	0	0	0	0	0	0	0	0	40	0.418109	0	0	0	0	0
CARD_101689_TM_#01	antibiotic inactivation enzyme; DHA-15	cephalosporin, cephamycin	0000032, 0000044	3000557	3002146	6	0	0	0	0	0	0	0	0	1	0.38834	0	0	123	69.8452	0	0	0	0	0	0	13	37.7013	0	0	0	0	0	0	0	0	0	0	14	13.7301	0	0	255	26.0968	0	0	0	0	0
CARD_101689_TM_#05	antibiotic inactivation enzyme; DHA-15	cephalosporin, cephamycin	0000032, 0000044	3000557	3002146	6	0	0	0	0	0	0	0	0	2	1.59013	0	0	40	36.1152	0	0	0	0	0	0	0	0	0	0	0	0	0	0	0	0	0	0	0	0	0	0	176	56.2385	0	0	0	0	0
CARD_101689_TM_#08	antibiotic inactivation enzyme; DHA-15	cephalosporin, cephamycin	0000032, 0000044	3000557	3002146	6	0	0	0	0	0	0	0	0	4	0.505679	0	0	335	42.5414	0	0	0	0	0	0	2	1.88995	0	0	0	0	0	0	0	0	0	0	12	3.34239	0	0	1195	35.079	0	0	0	0	5
CARD_101689_TM_#02	antibiotic inactivation enzyme; DHA-15	cephalosporin, cephamycin	0000032, 0000044	3000557	3002146	6	0	0	0	0	0	0	0	0	0	0	0	0	47	21.6709	0	0	0	0	0	0	4	12.4986	0	0	0	0	0	0	0	0	0	0	4	4.33619	0	0	173	19.687	0	0	0	0	0
CARD_101689_TM_#03	antibiotic inactivation enzyme; DHA-15	cephalosporin, cephamycin	0000032, 0000044	3000557	3002146	6	0	0	0	0	0	0	0	0	0	0	0	0	148	139.377	0	0	0	0	0	0	1	3.82286	0	0	0	0	0	0	0	0	0	0	5	5.63395	0	0	234	44.1226	0	0	0	0	0
CARD_101050_TM_#06	antibiotic inactivation enzyme; EBR-1 beta-lactamase	antibiotic molecule	1000003	3000557	3000842	7	0	0	0	0	0	0	0	0	0	0	0	0	12	26.5352	0	0	0	0	0	0	0	0	0	0	0	0	0	0	0	0	0	0	0	0	0	0	0	0	0	0	0	0	0
RESF_302601_TM_#02	antibiotic inactivation enzyme; EreA	erythromycin, roxithromycin, clarithromycin, macrolide antibiotic	0000006, 0000027, 0000065, 0000000	3000557	3000361	5	0	0	4	11.5635	0	0	0	0	0	0	0	0	0	0	0	0	0	0	0	0	0	0	0	0	0	0	0	0	0	0	0	0	0	0	0	0	0	0	0	0	0	0	0
RESF_302601_TM_#08	antibiotic inactivation enzyme; EreA	erythromycin, roxithromycin, clarithromycin, macrolide antibiotic	0000006, 0000027, 0000065, 0000000	3000557	3000361	5	0	0	5	16.0604	0	0	0	0	0	0	0	0	12	5.24153	0	0	0	0	0	0	0	0	0	0	0	0	0	0	0	0	0	0	0	0	0	0	0	0	0	0	0	0	0
RESF_302601_TM_#10	antibiotic inactivation enzyme; EreA	erythromycin, roxithromycin, clarithromycin, macrolide antibiotic	0000006, 0000027, 0000065, 0000000	3000557	3000361	5	0	0	27	86.7661	0	0	0	0	0	0	0	0	0	0	0	0	0	0	0	0	0	0	0	0	0	0	0	0	0	0	0	0	0	0	0	0	0	0	0	0	0	0	0
RESF_302601_TM_#14	antibiotic inactivation enzyme; EreA	erythromycin, roxithromycin, clarithromycin, macrolide antibiotic	0000006, 0000027, 0000065, 0000000	3000557	3000361	5	0	0	9	25.7051	0	0	0	0	0	0	0	0	0	0	0	0	0	0	3	1.14097	0	0	0	0	0	0	4	5.99115	0	0	0	0	0	0	0	0	0	0	0	0	0	0	0
RESF_302601_TM_#05	antibiotic inactivation enzyme; EreA	erythromycin, roxithromycin, clarithromycin, macrolide antibiotic	0000006, 0000027, 0000065, 0000000	3000557	3000361	5	0	0	0	0	0	0	0	0	0	0	0	0	2	0.907188	0	0	0	0	0	0	0	0	0	0	0	0	0	0	0	0	0	0	0	0	0	0	0	0	0	0	0	0	0
CARD_101227_TM_#01	antibiotic inactivation enzyme; EreD	macrolide antibiotic	0	3000557	3004608	5	6	0.0981756	0	0	0	0	0	0	0	0	2	0.0763736	68	3.09157	0	0	0	0	0	0	0	0	64	24.3954	0	0	4	0.728098	0	0	749	111.877	8	0.77227	0	0	268	2.84334	0	0	0	0	2
CARD_102626_TM_#01	antibiotic inactivation enzyme; ERP-1	penam	3000008	3000557	3004782	6	0	0	0	0	2	0.211476	0	0	0	0	5048	205.093	0	0	2	0.060326	126	4.2899	0	0	0	0	88	34.7723	176	7.20712	0	0	0	0	90	13.9307	7	0.6997	0	0	0	0	0	0	563	16.1705	0
CARD_102342_TM_#04	antibiotic inactivation enzyme; Escherichia coli ampC beta-lactamase	penicillin, cephalosporin, penam	0000054, 0000032, 3000008	3000557	3004290	6	0	0	0	0	54	51.9407	74	21.9074	2214	940.388	8084	3317.99	9258	4592.15	579	165.956	661	226.919	2	0.842619	14	59.3915	0	0	14	5.01239	167	269.846	7	4.85428	523	776.344	70	71.8628	2545	10821.7	100580	10994.7	1411	458.99	463	134.879	38101
CARD_102342_TM_#05	antibiotic inactivation enzyme; Escherichia coli ampC beta-lactamase	penicillin, cephalosporin, penam	0000054, 0000032, 3000008	3000557	3004290	6	0	0	0	0	4	3.93097	94	25.7117	229	85.7409	3131	1073.21	8178	3349.78	2	0.453359	613	177.61	0	0	0	0	0	0	20	6.20912	28	39.4541	0	0	33	39.009	26	19.5387	10	49.8679	33591	3137.09	81	22.4909	291	71.1651	30549
CARD_102342_TM_#01	antibiotic inactivation enzyme; Escherichia coli ampC beta-lactamase	penicillin, cephalosporin, penam	0000054, 0000032, 3000008	3000557	3004290	6	0	0	0	0	0	0	30	14.2371	118	101.773	1947	1571.61	4348	4210.25	4	1.87011	394	305.956	0	0	10	77.413	0	0	0	0	0	0	0	0	12	38.477	16	53.0419	1	7.1208	37860	8355.84	32	27.722	227	116.875	15182
CARD_102342_TM_#06	antibiotic inactivation enzyme; Escherichia coli ampC beta-lactamase	penicillin, cephalosporin, penam	0000054, 0000032, 3000008	3000557	3004290	6	0	0	0	0	0	0	41	63.0543	70	79.3207	1684	2085.9	3515	4886.48	0	0	223	226.795	0	0	0	0	0	0	20	20.4901	0	0	0	0	11	42.3247	4	10.4666	0	0	27232	8900.28	26	23.3024	138	99.7612	12235
CARD_102342_TM_#08	antibiotic inactivation enzyme; Escherichia coli ampC beta-lactamase	penicillin, cephalosporin, penam	0000054, 0000032, 3000008	3000557	3004290	6	0	0	0	0	0	0	106	33.6241	221	90.0694	3633	1429.64	10420	4866.98	1	0.241304	800	268.106	0	0	22	59.686	0	0	6	1.98291	0	0	0	0	35	45.1839	6	4.94846	0	0	37656	3949.68	89	26.8235	368	94.3863	31771
CARD_102342_TM_#09	antibiotic inactivation enzyme; Escherichia coli ampC beta-lactamase	penicillin, cephalosporin, penam	0000054, 0000032, 3000008	3000557	3004290	6	0	0	0	0	0	0	44	21.2212	205	126.787	3412	1860.29	6756	4262.43	8	3.20772	509	223.498	0	0	3	10.97	0	0	0	0	0	0	0	0	24	41.6384	10	11.9914	3	14.8608	57125	8313.56	57	23.5565	185	63.1102	23406
CARD_101963_TM_#01	antibiotic inactivation enzyme; Escherichia coli ampC1 beta-lactamase	cephalosporin, penam	0000032, 3000008	3000557	3004611	6	0	0	0	0	0	0	215	17.5212	613	78.8444	1371	159.562	27038	3591.17	12	1.02236	2	0.190986	0	0	0	0	0	0	0	0	0	0	0	0	32	14.0072	17	4.90484	4	5.36154	110735	3432.44	379	36.0826	319	26.3225	79947
CARD_101963_TM_#02	antibiotic inactivation enzyme; Escherichia coli ampC1 beta-lactamase	cephalosporin, penam	0000032, 3000008	3000557	3004611	6	0	0	0	0	0	0	435	24.8047	965	85.5295	2569	205.412	40664	3733.78	4	0.239374	19	1.29632	0	0	0	0	0	0	0	0	0	0	0	0	88	26.4839	29	5.69292	8	7.07481	173830	3710.53	449	29.7392	372	20.9702	136946
ARGA_400163_TM_#01	antibiotic inactivation enzyme; Escherichia coli ampH beta-lactamase	cephalosporin, penam	0000032, 3000008	3000557	3004612	6	41	6.39298	0	0	153	160.111	228	68.9185	5617	2431.61	8873	3711.48	12747	6175.73	185	54.9254	1048	368.165	11	4.63178	39	117.54	0	0	679	261.755	646	1137.95	3835	3041.41	198	306.275	43	39.3469	1843	7961.42	117988	13095.2	1274	448.113	4049	1173.07	39725
ARGA_400163_TM_#04	antibiotic inactivation enzyme; Escherichia coli ampH beta-lactamase	cephalosporin, penam	0000032, 3000008	3000557	3004612	6	1	0.134732	0	0	0	0	73	18.9148	1101	413.65	5561	1982.97	10974	4480.69	30	7.37671	885	263.425	0	0	19	60.9531	0	0	0	0	0	0	928	589.794	54	67.3352	35	30.1899	81	296.681	81490	7685.72	364	100.594	390	92.2934	39501
ARGA_400163_TM_#05	antibiotic inactivation enzyme; Escherichia coli ampH beta-lactamase	cephalosporin, penam	0000032, 3000008	3000557	3004612	6	3	0.765912	0	0	65	256.807	124	97.879	4289	3697.74	6163	5126.55	10195	10154.8	242	123.219	768	548.599	2	7.07399	21	161.835	0	0	59	35.8756	13	88.8205	3369	5686.39	111	272.308	32	63.2017	552	5198.91	86630	18970	1891	1207.1	2463	1321.53	32292
ARGA_400163_TM_#08	antibiotic inactivation enzyme; Escherichia coli ampH beta-lactamase	cephalosporin, penam	0000032, 3000008	3000557	3004612	6	24	5.65195	0	0	126	302.279	309	149.841	10177	6914.19	12509	8233.11	14372	11427.5	577	263.107	1444	799.73	9	6.49264	73	420.376	0	0	35	18.0641	250	810.798	7385	9941.71	291	669.071	61	130.373	1909	13850.9	161824	29200.3	3815	2186.42	8236	3728.49	61263
ARGA_400163_TM_#12	antibiotic inactivation enzyme; Escherichia coli ampH beta-lactamase	cephalosporin, penam	0000032, 3000008	3000557	3004612	6	476	78.1867	0	0	280	262.912	2256	631.084	11171	4570.37	9458	3696.45	15404	6789.75	1459	403.713	2340	775.123	8992	4165.51	268	864.044	160	732.719	1713	645.452	410	751.909	2883	2117.26	330	450.57	301	283.297	2256	9466.21	83866	8642.97	3447	1109.18	2047	529.685	60955
ARGA_400163_TM_#06	antibiotic inactivation enzyme; Escherichia coli ampH beta-lactamase	cephalosporin, penam	0000032, 3000008	3000557	3004612	6	0	0	0	0	0	0	49	14.8059	656	288.373	3038	1364.37	8487	4564.78	37	10.649	435	158.783	0	0	2	6.46946	0	0	5	1.9702	0	0	978	758.89	11	16.2787	3	2.86031	5	21.9101	48927	5709.79	196	65.7756	233	65.746	26329
CARD_102000_TM_#01	antibiotic inactivation enzyme; ESP-1	carbapenem	20	3000557	3003717	7	0	0	0	0	76	8.60233	0	0	43	1.93302	0	0	96	4.59457	9	0.273152	25	0.877199	0	0	0	0	0	0	0	0	0	0	0	0	144	22.5674	17	1.69863	0	0	0	0	1215	41.3679	2331	67.9434	0
CARD_101390_TM_#01	antibiotic inactivation enzyme; EXO-1	penam	3000008	3000557	3003564	6	0	0	0	0	2	0.218387	0	0	0	0	60	2.3973	0	0	4	0.11734	0	0	6	0.277411	0	0	0	0	0	0	0	0	0	0	0	0	0	0	2	0.89359	0	0	9	0.292369	0	0	0
NCBI_202043_TM_#01	antibiotic inactivation enzyme; FAR-1	penam	3000008	3000557	3004784	6	0	0	0	0	0	0	12	0.326334	0	0	0	0	0	0	0	0	0	0	0	0	0	0	0	0	0	0	0	0	0	0	0	0	0	0	0	0	0	0	4	0.132407	0	0	0
CARD_102191_TM_#02	antibiotic inactivation enzyme; FONA-1	penam	3000008	3000557	3004788	6	1043	185.475	0	0	466	527.098	7190	2195.36	13388	5623.05	5099	2118.65	972	446.253	1410	401.792	2127	765.305	32683	15739.7	865	2984.79	459	1780.33	3834	1563.17	17	27.2184	86	72.1956	0	0	750	800.036	163	708.751	216	22.5734	1994	672.701	973	271.835	566
CARD_102191_TM_#03	antibiotic inactivation enzyme; FONA-1	penam	3000008	3000557	3004788	6	761	139.918	6	19.2724	331	363.512	5804	1818.19	11063	4908.56	4317	1855.98	361	178.816	1171	348.194	1716	631.416	24038	12011.4	617	2205.47	394	1636.17	3105	1286.44	32	55.0513	43	34.4937	2	2.85015	599	666.43	6	25.4252	0	0	1738	629.81	944	281.188	401
CARD_102191_TM_#04	antibiotic inactivation enzyme; FONA-1	penam	3000008	3000557	3004788	6	431	158.958	6	34.6904	296	557.385	2581	1590.81	3316	2759.74	1203	1023.06	175	167.638	466	274.705	191	126.712	11531	11370.4	374	2313.55	154	1026.82	1435	1143.15	29	89.7673	42	81.7588	0	0	240	423.009	4	30.3821	0	0	562	370.688	143	92.2827	129
CARD_102191_TM_#05	antibiotic inactivation enzyme; FONA-1	penam	3000008	3000557	3004788	6	1259	239.841	0	0	599	772.933	8942	2988.77	9849	4739.95	4709	2179.77	593	338.333	1488	494.255	844	342.022	38354	20778.4	936	3652.35	601	2402.23	5180	2185.8	11	19.644	133	123.634	0	0	723	851.073	17	91.3033	0	0	1890	688.153	535	181.204	579
CARD_102191_TM_#06	antibiotic inactivation enzyme; FONA-1	penam	3000008	3000557	3004788	6	1294	234.121	0	0	992	1120.55	8963	2933.8	16982	7676.68	6039	2676.19	522	284.354	1718	518.424	2605	948.067	37007	19235.2	924	3432.78	722	2829.92	5552	2388.41	26	44.7117	688	563.147	2	2.85015	902	951.425	11	73.683	0	0	2889	1031.93	1360	386.734	596
CARD_102191_TM_#07	antibiotic inactivation enzyme; FONA-1	penam	3000008	3000557	3004788	6	1139	248.3	0	0	580	760.884	8439	3124.18	14765	7735.5	6779	3411.07	456	265.265	1709	617.57	2325	943.099	32439	19401.5	1061	4225.22	445	2379.65	4321	2188.92	46	88.9935	69	68.969	4	6.43542	755	896.981	0	0	0	0	1953	787.232	1389	457.725	483
CARD_102191_TM_#08	antibiotic inactivation enzyme; FONA-1	penam	3000008	3000557	3004788	6	1047	282.097	22	72.4546	453	867.54	8143	3648.16	7832	5870.96	7739	4880.96	588	408.369	1352	676.59	2453	1287.26	35721	26015.9	779	4261.71	505	2894.44	4327	2874.4	0	0	103	120.582	0	0	764	1205.12	4	15.3617	0	0	2108	1124.19	1309	614.168	594
CARD_101221_TM_#01	antibiotic inactivation enzyme; FosA	fosfomycin	25	3000557	3000149	5	0	0	0	0	4	1.23753	0	0	0	0	0	0	0	0	0	0	0	0	0	0	0	0	0	0	0	0	0	0	0	0	0	0	0	0	0	0	3395	99.8216	0	0	0	0	0
RESF_302371_TM_#01	antibiotic inactivation enzyme; FosA2	fosfomycin	25	3000557	3002804	5	6	1.17584	0	0	0	0	145	56.3156	1541	888.218	5539	3119.59	2410	1680.84	4	1.36008	188	80.6335	5	3.52786	46	187.134	0	0	0	0	574	1240.77	10	9.87791	431	770.638	2	2.25358	2510	15628.4	62449	9420.91	563	261.935	221	76.3492	10455
RESF_302371_TM_#02	antibiotic inactivation enzyme; FosA2	fosfomycin	25	3000557	3002804	5	5	0.829121	0	0	13	13.9504	237	74.8782	2441	1171.1	8979	4074.51	3126	1646.45	11	3.43881	307	114.254	1	0.453461	23	74.6928	0	0	0	0	1329	2821.83	36	31.4707	542	861.173	4	3.81375	5111	24867.5	103048	12372.5	991	373.965	380	117.091	18676
RESF_302371_TM_#03	antibiotic inactivation enzyme; FosA2	fosfomycin	25	3000557	3002804	5	6	0.783896	0	0	12	10.1252	331	85.8876	1770	673.352	14091	5070.61	3522	1443.29	19	5.50775	486	147.381	4	1.42909	63	215.777	0	0	0	0	1474	2191.07	67	51.2082	596	764.105	13	10.2162	5111	19590	133601	12827.3	1350	397.444	422	104.558	23354
RESF_302371_TM_#04	antibiotic inactivation enzyme; FosA2	fosfomycin	25	3000557	3002804	5	4	1.93461	0	0	5	15.7166	123	106.818	1584	2147.5	4444	5719.17	2252	3509.7	27	22.5398	187	196.616	5	6.60037	22	205.944	0	0	0	0	775	4122.61	784	1979.4	166	842.229	13	35.8069	1982	28154.8	42952	14842	626	663.153	354	328.05	9456
CARD_100787_TM_#01	antibiotic inactivation enzyme; FosA3	fosfomycin	25	3000557	3002872	5	0	0	0	0	0	0	0	0	43	19.6235	5	1.8952	0	0	0	0	0	0	0	0	0	0	0	0	0	0	0	0	0	0	0	0	0	0	0	0	14	1.41993	12	4.0446	0	0	0
CARD_100787_TM_#03	antibiotic inactivation enzyme; FosA3	fosfomycin	25	3000557	3002872	5	0	0	0	0	0	0	0	0	58	22.9381	0	0	0	0	0	0	0	0	0	0	0	0	0	0	0	0	0	0	0	0	0	0	0	0	0	0	21	1.89969	11	2.99813	0	0	1
CARD_100787_TM_#05	antibiotic inactivation enzyme; FosA3	fosfomycin	25	3000557	3002872	5	0	0	0	0	0	0	0	0	11	6.68599	0	0	0	0	0	0	0	0	0	0	0	0	0	0	0	0	0	0	0	0	0	0	0	0	0	0	14	2.02038	5	2.2213	18	15.5914	26
CARD_100787_TM_#06	antibiotic inactivation enzyme; FosA3	fosfomycin	25	3000557	3002872	5	0	0	0	0	0	0	0	0	369	151.35	48	16.7843	8	3.23742	1	0.249348	21	6.49852	0	0	0	0	0	0	0	0	0	0	19	12.8462	0	0	0	0	4	15.191	6234	663.746	10	2.87934	0	0	956
RESF_302360_TM_#01	antibiotic inactivation enzyme; FosB	fosfomycin	25	3000557	3000172	5	0	0	1	6.67122	0	0	0	0	0	0	0	0	0	0	0	0	0	0	0	0	0	0	0	0	0	0	0	0	0	0	0	0	0	0	0	0	2	0.213385	0	0	0	0	2
RESF_302360_TM_#03	antibiotic inactivation enzyme; FosB	fosfomycin	25	3000557	3000172	5	0	0	0	0	0	0	2	0.731532	8	4.50474	0	0	16	8.13051	0	0	0	0	0	0	0	0	0	0	0	0	0	0	0	0	0	0	0	0	0	0	1	0.136922	0	0	0	0	39
RESF_302384_TM_#01	antibiotic inactivation enzyme; FosB2	fosfomycin	25	3000557	3005100	5	0	0	0	0	0	0	0	0	1	0.121095	0	0	2	0.253622	0	0	0	0	0	0	0	0	0	0	0	0	0	0	0	0	0	0	0	0	0	0	0	0	0	0	0	0	0
CARD_102705_TM_#01	antibiotic inactivation enzyme; FosB2	fosfomycin	25	3000557	3005100	5	0	0	0	0	0	0	0	0	0	0	0	0	0	0	0	0	0	0	0	0	0	0	0	0	0	0	0	0	0	0	0	0	0	0	0	0	0	0	0	0	22	1.44325	0
CARD_102180_TM_#01	antibiotic inactivation enzyme; FosD	fosfomycin	25	3000557	3004674	5	2	0.0856575	0	0	0	0	0	0	0	0	0	0	0	0	0	0	0	0	0	0	0	0	0	0	0	0	0	0	0	0	0	0	0	0	0	0	0	0	0	0	0	0	0
CARD_100099_TM_#05	antibiotic inactivation enzyme; fosfomycin thiol transferase	fosfomycin	25	3000557	3000133	4	50	15.4449	4	10.8407	1	0.870136	485	129.724	4537	1741.89	13583	5034.78	5386	2299.12	45	10.7816	596	188.459	18	7.37649	58	152.492	0	0	0	0	2012	3196.23	9010	6477.55	861	1138.61	12	9.29601	6450	25291.7	149249	14609	1673	492.413	560	156.495	33804
CARD_100099_TM_#03	antibiotic inactivation enzyme; fosfomycin thiol transferase	fosfomycin	25	3000557	3000133	4	0	0	0	0	0	0	10	3.17203	1856	883.67	1346	627.574	317	161.315	26	7.6523	70	27.6644	0	0	0	0	0	0	0	0	0	0	5124	4610.27	16	24.0718	2	1.90687	118	569.742	7309	886.375	44	17.4487	40	12.1743	3954
NCBI_204619_TM_#04	antibiotic inactivation enzyme; fosfomycin thiol transferase	fosfomycin	25	3000557	3000133	4	0	0	0	0	0	0	0	0	18	6.44504	4	1.27926	44	18.6419	0	0	0	0	0	0	0	0	0	0	0	0	0	0	0	0	0	0	0	0	3	10.6812	5436	531.489	1	0.26378	0	0	68
NCBI_204619_TM_#05	antibiotic inactivation enzyme; fosfomycin thiol transferase	fosfomycin	25	3000557	3000133	4	0	0	0	0	0	0	0	0	3	2.41326	4	2.92402	243	245.919	0	0	0	0	0	0	0	0	0	0	0	0	0	0	0	0	0	0	0	0	18	271.82	2830	701.982	17	10.2644	0	0	173
NCBI_203935_TM_#01	antibiotic inactivation enzyme; FosL1	fosfomycin	25	3000557	3005024	5	0	0	0	0	0	0	0	0	0	0	0	0	0	0	0	0	0	0	0	0	0	0	0	0	0	0	0	0	0	0	9	44.3555	0	0	0	0	0	0	0	0	0	0	0
NCBI_203935_TM_#02	antibiotic inactivation enzyme; FosL1	fosfomycin	25	3000557	3005024	5	0	0	0	0	0	0	0	0	0	0	0	0	0	0	0	0	0	0	0	0	0	0	0	0	0	0	0	0	0	0	90	113.472	0	0	0	0	0	0	0	0	0	0	0
NCBI_203935_TM_#04	antibiotic inactivation enzyme; FosL1	fosfomycin	25	3000557	3005024	5	0	0	0	0	0	0	0	0	0	0	0	0	0	0	0	0	0	0	0	0	0	0	0	0	0	0	0	0	0	0	30	75.4629	0	0	0	0	0	0	0	0	0	0	0
CARD_100115_TM_#01	antibiotic inactivation enzyme; FosX	fosfomycin	25	3000557	3000198	5	0	0	0	0	0	0	8	2.97119	0	0	0	0	0	0	0	0	0	0	0	0	0	0	0	0	0	0	0	0	0	0	0	0	2	1.95705	0	0	0	0	0	0	0	0	0
CARD_100115_TM_#03	antibiotic inactivation enzyme; FosX	fosfomycin	25	3000557	3000198	5	0	0	0	0	0	0	6	1.91302	0	0	0	0	0	0	0	0	0	0	0	0	0	0	0	0	0	0	0	0	0	0	0	0	0	0	0	0	0	0	0	0	0	0	0
CARD_102649_TM_#09	antibiotic inactivation enzyme; FRI beta-lactamase	penam	3000008	3000557	3004796	5	0	0	0	0	0	0	68	78.7191	0	0	0	0	0	0	0	0	9	9.8258	0	0	17	158.861	0	0	155	176.574	0	0	0	0	0	0	1	2.75437	0	0	0	0	3	2.81365	32	26.5286	0
CARD_102649_TM_#03	antibiotic inactivation enzyme; FRI beta-lactamase	penam	3000008	3000557	3004796	5	0	0	0	0	0	0	0	0	0	0	0	0	0	0	0	0	0	0	0	0	4	10.852	0	0	0	0	0	0	0	0	0	0	0	0	0	0	0	0	0	0	0	0	0
CARD_102192_TM_#03	antibiotic inactivation enzyme; FRI-1	penam	3000008	3000557	3004797	6	2	0.319365	0	0	0	0	25	7.6032	0	0	0	0	0	0	0	0	1	0.321847	0	0	66	210.314	0	0	64	26.6007	0	0	0	0	0	0	10	10.4586	0	0	0	0	0	0	51	13.6445	0
CARD_102192_TM_#06	antibiotic inactivation enzyme; FRI-1	penam	3000008	3000557	3004797	6	0	0	0	0	0	0	5	6.0961	0	0	0	0	0	0	0	0	0	0	0	0	13	182.223	0	0	14	17.2977	0	0	0	0	0	0	0	0	0	0	0	0	0	0	0	0	0
CARD_102192_TM_#09	antibiotic inactivation enzyme; FRI-1	penam	3000008	3000557	3004797	6	0	0	0	0	0	0	172	48.4134	0	0	0	0	0	0	0	0	5	1.48452	0	0	169	541.988	0	0	430	185.439	0	0	0	0	0	0	23	26.113	0	0	0	0	6	1.68819	151	41.7099	0
CARD_102192_TM_#11	antibiotic inactivation enzyme; FRI-1	penam	3000008	3000557	3004797	6	0	0	0	0	0	0	0	0	0	0	0	0	0	0	0	0	0	0	0	0	0	0	0	0	1	0.379446	0	0	0	0	0	0	0	0	0	0	0	0	0	0	0	0	0
NCBI_203542_TM_#04	antibiotic inactivation enzyme; GES beta-lactamase	carbapenem, cephalosporin, penam	0000020, 0000032, 3000008	3000557	3000066	5	0	0	3	12.3894	0	0	0	0	0	0	0	0	0	0	0	0	0	0	0	0	0	0	0	0	0	0	0	0	0	0	0	0	0	0	0	0	0	0	0	0	0	0	16
NCBI_203542_TM_#08	antibiotic inactivation enzyme; GES beta-lactamase	carbapenem, cephalosporin, penam	0000020, 0000032, 3000008	3000557	3000066	5	0	0	2	5.9811	0	0	0	0	0	0	0	0	0	0	0	0	0	0	0	0	0	0	0	0	0	0	0	0	0	0	0	0	0	0	0	0	0	0	0	0	0	0	14
NCBI_203542_TM_#03	antibiotic inactivation enzyme; GES beta-lactamase	carbapenem, cephalosporin, penam	0000020, 0000032, 3000008	3000557	3000066	5	0	0	0	0	0	0	0	0	0	0	0	0	0	0	0	0	0	0	0	0	0	0	0	0	0	0	0	0	0	0	0	0	0	0	0	0	0	0	0	0	0	0	9
NCBI_203542_TM_#05	antibiotic inactivation enzyme; GES beta-lactamase	carbapenem, cephalosporin, penam	0000020, 0000032, 3000008	3000557	3000066	5	0	0	0	0	0	0	0	0	0	0	0	0	0	0	0	0	0	0	0	0	0	0	0	0	0	0	0	0	0	0	0	0	0	0	0	0	0	0	0	0	0	0	8
CARD_101967_TM_#01	antibiotic inactivation enzyme; gimA	tylosin, oleandomycin, chalcomycin, methymycin, macrolide antibiotic	3000145, 3000867, 3001222, 3001232, 0000000	3000557	3000463	6	0	0	0	0	0	0	0	0	26	1.09296	10	0.386563	14	0.626697	0	0	0	0	89	4.03703	0	0	0	0	0	0	0	0	0	0	0	0	0	0	0	0	0	0	0	0	0	0	0
NCBI_202398_TM_#02	antibiotic inactivation enzyme; GOB beta-lactamase	carbapenem, cephalosporin, penam	0000020, 0000032, 3000008	3000557	3004212	6	0	0	0	0	0	0	0	0	0	0	0	0	0	0	0	0	0	0	0	0	0	0	0	0	0	0	0	0	0	0	0	0	0	0	0	0	0	0	4	1.45751	8	2.61992	0
NCBI_202398_TM_#09	antibiotic inactivation enzyme; GOB beta-lactamase	carbapenem, cephalosporin, penam	0000020, 0000032, 3000008	3000557	3004212	6	0	0	0	0	0	0	0	0	0	0	0	0	0	0	0	0	0	0	0	0	0	0	0	0	0	0	0	0	0	0	0	0	0	0	0	0	0	0	2	0.679838	0	0	0
NCBI_206739_TM_#06	antibiotic inactivation enzyme; GOB-1	carbapenem, cephalosporin, penam	0000020, 0000032, 3000008	3000557	3000850	7	0	0	0	0	15	13.1681	0	0	15	9.86943	0	0	24	9.73468	3	0.703751	4	1.1253	0	0	0	0	0	0	0	0	0	0	0	0	41	51.1194	0	0	0	0	0	0	128	37.8695	252	61.9826	0
NCBI_206739_TM_#02	antibiotic inactivation enzyme; GOB-1	carbapenem, cephalosporin, penam	0000020, 0000032, 3000008	3000557	3000850	7	0	0	0	0	0	0	0	0	0	0	0	0	0	0	0	0	0	0	0	0	0	0	0	0	0	0	0	0	0	0	0	0	0	0	0	0	0	0	4	2.77563	0	0	0
NCBI_202031_TM_#02	antibiotic inactivation enzyme; GOB-16	carbapenem, cephalosporin, penam	0000020, 0000032, 3000008	3000557	3004808	7	0	0	0	0	0	0	0	0	0	0	0	0	0	0	0	0	0	0	0	0	0	0	0	0	0	0	0	0	0	0	0	0	0	0	0	0	0	0	13	2.07923	36	4.91551	0
NCBI_202031_TM_#04	antibiotic inactivation enzyme; GOB-16	carbapenem, cephalosporin, penam	0000020, 0000032, 3000008	3000557	3004808	7	0	0	0	0	0	0	0	0	0	0	0	0	0	0	0	0	0	0	0	0	0	0	0	0	0	0	0	0	0	0	0	0	0	0	0	0	0	0	2	0.218773	12	1.12293	0
CARD_102700_TM_#01	antibiotic inactivation enzyme; GPC-1	carbapenem	20	3000557	3005096	6	0	0	0	0	0	0	0	0	0	0	0	0	156	7.19648	0	0	1	0.0344381	0	0	1	0.333742	0	0	0	0	22	4.05256	0	0	0	0	0	0	0	0	11	0.115719	1	0.0334958	0	0	0
CARD_102466_TM_#02	antibiotic inactivation enzyme; HERA-1	penam	3000008	3000557	3004448	6	0	0	0	0	0	0	34	2.67939	0	0	62	6.88586	22747	2894.36	0	0	33	2.99076	0	0	0	0	0	0	0	0	0	0	0	0	95	40.4012	0	0	0	0	34311	1017.93	616	56.3748	23	1.86539	244
CARD_102466_TM_#05	antibiotic inactivation enzyme; HERA-1	penam	3000008	3000557	3004448	6	0	0	0	0	0	0	3	0.914416	6	2.78401	16	6.0703	5650	2420.34	0	0	9	2.19598	0	0	0	0	0	0	0	0	0	0	0	0	27	36.6639	0	0	0	0	7424	751.614	133	41.001	13	3.69506	108
CARD_102466_TM_#04	antibiotic inactivation enzyme; HERA-1	penam	3000008	3000557	3004448	6	0	0	0	0	0	0	0	0	0	0	14	8.42806	3751	3199.93	0	0	4	2.54338	0	0	0	0	0	0	0	0	0	0	0	0	5	11.362	0	0	0	0	5011	973.983	129	78.0128	11	4.67912	65
CARD_102292_TM_#01	antibiotic inactivation enzyme; HMB-1	carbapenem	20	3000557	3004092	7	0	0	0	0	48	6.81469	0	0	0	0	0	0	83	4.91496	0	0	0	0	0	0	0	0	0	0	0	0	0	0	0	0	0	0	0	0	0	0	332	4.52255	0	0	0	0	175
CARD_101846_TM_#04	antibiotic inactivation enzyme; IMI-2	carbapenem	20	3000557	3001859	6	0	0	0	0	0	0	0	0	0	0	0	0	0	0	0	0	0	0	0	0	0	0	0	0	0	0	0	0	0	0	0	0	0	0	6	23.5723	0	0	0	0	0	0	0
CARD_100748_TM_#01	antibiotic inactivation enzyme; IMP beta-lactamase	carbapenem, cephalosporin, cephamycin, penam, penem	0000020, 0000032, 0000044, 3000008, 3003706	3000557	3000020	6	0	0	28	78.3635	0	0	0	0	0	0	0	0	0	0	0	0	0	0	0	0	0	0	0	0	0	0	0	0	0	0	0	0	1	0.799657	0	0	0	0	0	0	0	0	0
RESF_301902_TM_#08	antibiotic inactivation enzyme; IMP beta-lactamase	carbapenem, cephalosporin, cephamycin, penam, penem	0000020, 0000032, 0000044, 3000008, 3003706	3000557	3000020	6	0	0	1	2.89086	0	0	0	0	0	0	0	0	0	0	0	0	0	0	0	0	0	0	0	0	0	0	23	35.5974	0	0	0	0	0	0	0	0	0	0	0	0	0	0	14
CARD_100748_TM_#04	antibiotic inactivation enzyme; IMP beta-lactamase	carbapenem, cephalosporin, cephamycin, penam, penem	0000020, 0000032, 0000044, 3000008, 3003706	3000557	3000020	6	0	0	0	0	0	0	0	0	0	0	4	1.46201	3	1.26358	0	0	0	0	0	0	0	0	0	0	0	0	0	0	6	8.1265	0	0	2	2.324	0	0	0	0	0	0	0	0	0
CARD_100748_TM_#03	antibiotic inactivation enzyme; IMP beta-lactamase	carbapenem, cephalosporin, cephamycin, penam, penem	0000020, 0000032, 0000044, 3000008, 3003706	3000557	3000020	6	0	0	0	0	0	0	0	0	0	0	0	0	0	0	0	0	0	0	0	0	0	0	0	0	0	0	0	0	0	0	0	0	3	10.624	0	0	0	0	0	0	0	0	2
CARD_101010_TM_#06	antibiotic inactivation enzyme; IMP-2	carbapenem, cephalosporin, cephamycin, penam	0000020, 0000032, 0000044, 3000008, 3003706	3000557	3002193	7	0	0	0	0	0	0	0	0	0	0	0	0	16	8.19945	0	0	0	0	0	0	0	0	0	0	0	0	0	0	12	9.41557	0	0	0	0	0	0	0	0	0	0	0	0	0
CARD_101010_TM_#07	antibiotic inactivation enzyme; IMP-2	carbapenem, cephalosporin, cephamycin, penam	0000020, 0000032, 0000044, 3000008, 3003706	3000557	3002193	7	0	0	0	0	0	0	0	0	0	0	0	0	0	0	0	0	0	0	0	0	0	0	0	0	0	0	23	41.0739	0	0	0	0	0	0	0	0	0	0	0	0	0	0	11
CARD_101010_TM_#05	antibiotic inactivation enzyme; IMP-2	carbapenem, cephalosporin, cephamycin, penam	0000020, 0000032, 0000044, 3000008, 3003706	3000557	3002193	7	0	0	0	0	0	0	0	0	0	0	0	0	0	0	0	0	0	0	0	0	0	0	0	0	0	0	0	0	4	6.88363	0	0	0	0	0	0	0	0	0	0	0	0	0
CARD_101010_TM_#04	antibiotic inactivation enzyme; IMP-2	carbapenem, cephalosporin, cephamycin, penam	0000020, 0000032, 0000044, 3000008, 3003706	3000557	3002193	7	0	0	0	0	0	0	0	0	0	0	0	0	0	0	0	0	0	0	0	0	0	0	0	0	0	0	0	0	0	0	0	0	5	8.85334	0	0	0	0	0	0	0	0	2
CARD_101888_TM_#02	antibiotic inactivation enzyme; IMP-27	carbapenem, cephalosporin, cephamycin, penam	0000020, 0000032, 0000044, 3000008, 3003706	3000557	3002218	7	0	0	0	0	0	0	0	0	0	0	0	0	18	1.324	0	0	0	0	0	0	0	0	0	0	0	0	0	0	4	0.462432	0	0	2	0.306042	0	0	0	0	5	0.26646	0	0	3
RESF_301903_TM_#01	antibiotic inactivation enzyme; IMP-45	carbapenem, cephalosporin, cephamycin, penam	0000020, 0000032, 0000044, 3000008, 3003706	3000557	3002236	7	0	0	0	0	0	0	0	0	0	0	2	0.187781	4	0.374148	0	0	0	0	0	0	0	0	0	0	0	0	0	0	4	0.634018	0	0	7	1.51215	0	0	0	0	1	0.0774399	0	0	2
RESF_301903_TM_#02	antibiotic inactivation enzyme; IMP-45	carbapenem, cephalosporin, cephamycin, penam	0000020, 0000032, 0000044, 3000008, 3003706	3000557	3002236	7	0	0	0	0	0	0	0	0	0	0	0	0	6	4.71738	0	0	0	0	0	0	0	0	0	0	0	0	0	0	0	0	0	0	0	0	0	0	0	0	0	0	0	0	0
CARD_101355_TM_#02	antibiotic inactivation enzyme; IND-11	carbapenem	20	3000557	3002267	7	0	0	0	0	0	0	0	0	0	0	0	0	0	0	0	0	0	0	0	0	0	0	0	0	0	0	0	0	0	0	0	0	0	0	0	0	3	0.0744592	0	0	0	0	0
CARD_101631_TM_#01	antibiotic inactivation enzyme; IND-4	carbapenem	20	3000557	3002260	7	0	0	0	0	0	0	0	0	0	0	0	0	30	1.78028	0	0	0	0	0	0	0	0	0	0	0	0	0	0	0	0	0	0	0	0	0	0	9	0.119903	41	1.74829	0	0	0
CARD_100951_TM_#05	antibiotic inactivation enzyme; IND-7	carbapenem	20	3000557	3002263	7	0	0	0	0	0	0	0	0	0	0	0	0	42	20.5416	0	0	0	0	0	0	0	0	0	0	0	0	0	0	0	0	0	0	0	0	0	0	0	0	0	0	0	0	2
CARD_100750_TM_#01	antibiotic inactivation enzyme; iri	rifampin, rifaximin, rifabutin, rifapentine, rifamycin antibiotic	3000169, 3000517, 3000530, 3000534, 3000157	3000557	3002884	5	9	0.152168	62	21.085	1416	153.73	68	1.93814	331	14.5296	2677	106.359	281	12.7494	107	3.11162	59	1.99194	36	1.65905	4	1.25527	0	0	88	3.4603	284	50.152	157	12.195	1572	235.905	7	0.675351	1523	675.633	32	0.332508	1321	43.2705	417	11.6891	3
CARD_100207_TM_#01	antibiotic inactivation enzyme; JOHN-1	carbapenem, cephalosporin, penam	0000020, 0000032, 3000008	3000557	3000840	7	0	0	0	0	0	0	0	0	19	1.02779	0	0	27	1.54121	0	0	0	0	0	0	0	0	0	0	0	0	0	0	0	0	3	0.568626	47	5.49954	0	0	86	1.11587	1130	46.2895	120	4.18816	22
CARD_101708_TM_#01	antibiotic inactivation enzyme; KHM-1	carbapenem, cephalosporin, cephamycin, penam	0000020, 0000032, 0000044, 3000008, 3003706	3000557	3000847	7	0	0	0	0	34	4.79426	0	0	0	0	0	0	53	3.16391	0	0	0	0	0	0	0	0	0	0	0	0	0	0	0	0	0	0	20	2.49342	0	0	100	1.35451	0	0	5	0.184139	37
NCBI_200155_TM_#05	antibiotic inactivation enzyme; L1 beta-lactamase	cephalosporin	32	3000557	3000582	7	2	0.394963	0	0	0	0	0	0	2	1.02381	3	1.39555	1171	757.572	0	0	0	0	0	0	8	30.6417	0	0	0	0	0	0	0	0	1	1.77586	0	0	5	25.8938	10245	1583.25	9	9.01647	0	0	6
CARD_101518_TM_#01	antibiotic inactivation enzyme; L1 beta-lactamase	cephalosporin	32	3000557	3000582	7	0	0	0	0	0	0	0	0	33	1.46876	7	0.275855	4396	203.935	2	0.05703	0	0	0	0	0	0	0	0	0	0	0	0	0	0	0	0	4	0.389872	21	9.43519	58577	633.087	89	2.89178	50	1.36848	46
NCBI_200155_TM_#04	antibiotic inactivation enzyme; L1 beta-lactamase	cephalosporin	32	3000557	3000582	7	0	0	0	0	0	0	0	0	7	2.91974	7	2.65328	1591	756.806	0	0	0	0	0	0	9	28.0733	0	0	0	0	60	103.224	0	0	0	0	4	3.6725	7	29.5909	2548	273.708	25	8.02069	10	2.67343	70
NCBI_200155_TM_#07	antibiotic inactivation enzyme; L1 beta-lactamase	cephalosporin	32	3000557	3000582	7	0	0	0	0	0	0	0	0	63	25.3946	3	1.0587	3500	1667.14	0	0	0	0	0	0	0	0	0	0	0	0	3	4.80325	0	0	0	0	0	0	37	145.362	25674	2791.39	62	21.3467	0	0	49
NCBI_200155_TM_#08	antibiotic inactivation enzyme; L1 beta-lactamase	cephalosporin	32	3000557	3000582	7	0	0	0	0	0	0	0	0	0	0	0	0	96	80.2897	0	0	0	0	0	0	0	0	0	0	0	0	0	0	0	0	0	0	0	0	0	0	1185	229.31	8	5.6273	0	0	0
CARD_101524_TM_#05	antibiotic inactivation enzyme; Lactobacillus reuteri cat-TC	azidamfenicol, chloramphenicol, thiamphenicol, phenicol antibiotic	3000382, 3000385, 3000456, 3000387	3000557	3002671	4	2	0.374907	0	0	1	1.21062	0	0	0	0	0	0	0	0	0	0	0	0	0	0	2	7.36708	0	0	0	0	0	0	0	0	0	0	0	0	0	0	0	0	0	0	0	0	0
CARD_101524_TM_#02	antibiotic inactivation enzyme; Lactobacillus reuteri cat-TC	azidamfenicol, chloramphenicol, thiamphenicol, phenicol antibiotic	3000382, 3000385, 3000456, 3000387	3000557	3002671	4	0	0	0	0	0	0	0	0	0	0	0	0	0	0	0	0	0	0	0	0	0	0	0	0	0	0	0	0	0	0	0	0	0	0	127	1165.93	0	0	0	0	0	0	0
CARD_102448_TM_#02	antibiotic inactivation enzyme; LAP-2	fluoroquinolone antibiotic, aminoglycoside antibiotic, tetracycline antibiotic, rifamycin antibiotic	0000001, 0000016, 3000050, 3000157	3000557	3004826	6	0	0	0	0	0	0	0	0	0	0	2	0.372148	0	0	0	0	0	0	0	0	0	0	0	0	0	0	0	0	0	0	0	0	0	0	0	0	70	3.71	0	0	0	0	46
CARD_102448_TM_#01	antibiotic inactivation enzyme; LAP-2	fluoroquinolone antibiotic, aminoglycoside antibiotic, tetracycline antibiotic, rifamycin antibiotic	0000001, 0000016, 3000050, 3000157	3000557	3004826	6	0	0	0	0	0	0	0	0	0	0	0	0	0	0	0	0	0	0	0	0	0	0	0	0	0	0	0	0	0	0	0	0	0	0	0	0	167	3.01925	0	0	0	0	71
NCBI_202795_TM_#05	antibiotic inactivation enzyme; Laribacter hongkongensis ampC beta-lactamase	cephalosporin, penam	0000032, 3000008	3000557	3004292	6	0	0	0	0	0	0	0	0	0	0	0	0	0	0	0	0	0	0	0	0	0	0	0	0	0	0	0	0	0	0	0	0	0	0	0	0	6	0.547689	0	0	0	0	0
CARD_102339_TM_#06	antibiotic inactivation enzyme; LCR-1	cephalosporin, penam	0000032, 3000008	3000557	3002997	6	0	0	0	0	0	0	0	0	0	0	0	0	0	0	0	0	0	0	0	0	0	0	0	0	0	0	0	0	0	0	0	0	0	0	0	0	6	1.09538	0	0	0	0	0
CARD_102129_TM_#01	antibiotic inactivation enzyme; lin	lincosamide antibiotic	17	3000557	3004651	4	0	0	0	0	0	0	46	1.31236	0	0	0	0	0	0	0	0	0	0	0	0	0	0	0	0	0	0	0	0	0	0	0	0	0	0	0	0	0	0	0	0	0	0	0
CARD_102639_TM_#01	antibiotic inactivation enzyme; LMB-1	carbapenem, cephalosporin, penam	0000020, 0000032, 3000008	3000557	3005018	7	0	0	0	0	4	0.436774	0	0	0	0	0	0	0	0	0	0	0	0	0	0	0	0	0	0	0	0	12	2.18501	0	0	0	0	0	0	0	0	10	0.106087	0	0	8	0.225083	394
NCBI_204575_TM_#07	antibiotic inactivation enzyme; lnuA	lincosamide antibiotic	17	3000557	3002835	4	0	0	2	5.42037	54823	53364.9	0	0	0	0	2	0.639629	0	0	4	1.78105	0	0	1	0.368437	66655	204616	0	0	349	172.233	0	0	4	2.86818	37	46.6338	243	220.879	5	17.802	0	0	0	0	0	0	0
NCBI_204575_TM_#02	antibiotic inactivation enzyme; lnuA	lincosamide antibiotic	17	3000557	3002835	4	0	0	0	0	3755	3992.69	2	0.487688	0	0	5	1.70568	0	0	0	0	0	0	0	0	0	0	0	0	10	5.91061	0	0	0	0	6	7.69541	175	175.948	8	37.6575	0	0	0	0	0	0	2
NCBI_204575_TM_#05	antibiotic inactivation enzyme; lnuA	lincosamide antibiotic	17	3000557	3002835	4	0	0	0	0	3377	4732.41	0	0	0	0	3	1.62581	4	2.05103	0	0	0	0	0	0	0	0	0	0	0	0	0	0	0	0	0	0	90	126.394	5	24.768	0	0	2	0.733995	0	0	0
CARD_100351_TM_#01	antibiotic inactivation enzyme; lnuC	lincosamide antibiotic	17	3000557	3002837	4	166	5.81122	302	216.847	121	27.3922	1425	84.7455	4	0.37855	1874	156.45	431	40.8286	2613	161.015	0	0	166	16.0141	4170	2870.91	404	330.261	10490	882.816	49660	18899.5	3051	500.79	655	207.26	8003	1621.2	91	85.3308	138	3.07761	8363	574.273	12	0.727891	118
CARD_101822_TM_#01	antibiotic inactivation enzyme; lnuD	lincosamide antibiotic	17	3000557	3002838	4	0	0	0	0	0	0	0	0	0	0	0	0	0	0	0	0	0	0	0	0	20	12.975	0	0	0	0	0	0	0	0	0	0	0	0	0	0	0	0	0	0	0	0	0
RESF_302605_TM_#01	antibiotic inactivation enzyme; lnuE	lincosamide antibiotic	17	3000557	3003762	4	0	0	0	0	229053	49159.6	0	0	0	0	0	0	0	0	2	0.104621	0	0	0	0	318716	205480	0	0	891	69.1652	0	0	0	0	24	7.0196	750	141.915	0	0	0	0	0	0	0	0	0
NCBI_202058_TM_#02	antibiotic inactivation enzyme; lnuF	lincosamide antibiotic	17	3000557	3002839	4	0	0	0	0	0	0	0	0	0	0	6	3.34933	0	0	0	0	0	0	0	0	0	0	0	0	0	0	0	0	0	0	48	72.2377	0	0	1	4.38203	43	4.52897	0	0	0	0	0
NCBI_202058_TM_#03	antibiotic inactivation enzyme; lnuF	lincosamide antibiotic	17	3000557	3002839	4	0	0	0	0	0	0	0	0	0	0	1	0.538635	0	0	0	0	0	0	0	0	0	0	0	0	0	0	0	0	0	0	55	102.638	0	0	22	102.927	66	8.57956	2	0.888521	0	0	0
NCBI_202058_TM_#05	antibiotic inactivation enzyme; lnuF	lincosamide antibiotic	17	3000557	3002839	4	0	0	0	0	0	0	0	0	0	0	0	0	0	0	0	0	0	0	0	0	0	0	0	0	0	0	0	0	0	0	4	14.8943	0	0	0	0	0	0	0	0	0	0	0
RESF_302591_TM_#01	antibiotic inactivation enzyme; lnuG	lincomycin, lincosamide antibiotic	0000046, 0000017	3000557	3004085	4	10	0.191709	0	0	0	0	956	31.0563	4	0.203835	300	13.7045	1692	88.6498	2	0.0650472	0	0	172	9.04254	57	21.3745	0	0	859	39.3432	0	0	0	0	195	33.4183	220	24.2377	522	265.313	85	1.02788	83	3.13745	0	0	428
RESF_302585_TM_#01	antibiotic inactivation enzyme; LnuP	lincosamide antibiotic	17	3000557	3004601	4	0	0	6	4.33429	0	0	68	4.0253	0	0	15	1.22556	155	14.7002	0	0	0	0	260	24.7339	4	2.57458	0	0	0	0	0	0	2	0.334621	23	7.14099	6	1.224	0	0	81	1.78683	0	0	0	0	0
CARD_101502_TM_#01	antibiotic inactivation enzyme; LRA-1	cephalosporin, penam	0000032, 3000008	3000557	3002482	6	0	0	0	0	0	0	0	0	0	0	0	0	0	0	0	0	0	0	0	0	0	0	0	0	0	0	0	0	0	0	0	0	0	0	0	0	0	0	4	0.132541	0	0	0
CARD_101956_TM_#01	antibiotic inactivation enzyme; LRA-10	cephalosporin, penam	0000032, 3000008	3000557	3002489	6	0	0	0	0	0	0	0	0	0	0	2	0.0779244	0	0	0	0	0	0	0	0	0	0	0	0	0	0	0	0	0	0	6	0.878555	9	0.852219	0	0	0	0	19	0.611008	0	0	1
CARD_100010_TM_#01	antibiotic inactivation enzyme; LRA-12	cephalosporin, penam	0000032, 3000008	3000557	3002511	7	0	0	0	0	3	0.336827	0	0	0	0	0	0	0	0	0	0	0	0	0	0	0	0	0	0	0	0	0	0	0	0	0	0	0	0	0	0	0	0	2	0.0664641	0	0	0
CARD_100696_TM_#01	antibiotic inactivation enzyme; LRA-18	cephalosporin, penam	0000032, 3000008	3000557	3002492	6	0	0	0	0	0	0	0	0	0	0	0	0	0	0	0	0	5	0.163379	0	0	0	0	0	0	0	0	0	0	0	0	0	0	0	0	0	0	0	0	0	0	0	0	0
CARD_101957_TM_#07	antibiotic inactivation enzyme; LRA-9	cephalosporin, penam	0000032, 3000008	3000557	3002488	7	0	0	2	6.23203	0	0	0	0	0	0	2	0.731005	0	0	0	0	0	0	5	2.10535	0	0	0	0	55	40.2663	0	0	0	0	0	0	1	0.885334	0	0	0	0	1	0.301462	0	0	0
CARD_100762_TM_#01	antibiotic inactivation enzyme; lsaE	lincomycin, pleuromutilin	0000046, 3001317	3000557	3003206	5	0	0	0	0	1	9.28146	99	86.5267	6	7.79667	3	6.64317	672	1024.06	0	0	0	0	0	0	10	68.1916	0	0	6	3.07351	0	0	2	13.3848	11	40.6218	7	19.4183	42	406.034	2	0.530022	10	13.9678	0	0	4
CARD_100762_TM_#02	antibiotic inactivation enzyme; lsaE	lincomycin, pleuromutilin	0000046, 3001317	3000557	3003206	5	0	0	0	0	0	0	1411	58.3323	31	1.99478	175	10.1591	11779	784.564	0	0	0	0	16	1.03282	70	32.7137	0	0	85	4.98361	96	25.4223	39	4.42693	166	36.4371	52	7.37911	477	309.223	37	0.561361	11	0.536614	0	0	8
CARD_102220_TM_#01	antibiotic inactivation enzyme; mgtA	erythromycin, tylosin, azithromycin, methymycin, macrolide antibiotic	0000006, 3000145, 3000158, 3001232, 0000000	3000557	3000462	6	4	1.32659	0	0	0	0	0	0	8	2.97016	0	0	0	0	0	0	0	0	0	0	0	0	0	0	0	0	0	0	0	0	0	0	0	0	0	0	0	0	0	0	0	0	0
CARD_102220_TM_#02	antibiotic inactivation enzyme; mgtA	erythromycin, tylosin, azithromycin, methymycin, macrolide antibiotic	0000006, 3000145, 3000158, 3001232, 0000000	3000557	3000462	6	0	0	0	0	0	0	0	0	0	0	2	0.0950533	0	0	0	0	0	0	0	0	0	0	0	0	0	0	0	0	0	0	0	0	0	0	0	0	0	0	0	0	0	0	0
CARD_101290_TM_#05	antibiotic inactivation enzyme; MOX-5	cephalosporin, cephamycin, penam	0000032, 0000044, 3000008	3000557	3002188	8	0	0	0	0	0	0	0	0	2	1.73259	3	3.07022	12	15.163	0	0	0	0	0	0	0	0	0	0	0	0	0	0	0	0	0	0	0	0	0	0	2889	980.474	23	22.0442	0	0	111
CARD_101290_TM_#02	antibiotic inactivation enzyme; MOX-5	cephalosporin, cephamycin, penam	0000032, 0000044, 3000008	3000557	3002188	8	0	0	0	0	0	0	0	0	0	0	20	7.58079	27	12.4636	0	0	0	0	0	0	0	0	0	0	0	0	0	0	0	0	0	0	0	0	0	0	9279	1125.41	18	8.43174	14	13.1811	442
CARD_101290_TM_#03	antibiotic inactivation enzyme; MOX-5	cephalosporin, cephamycin, penam	0000032, 0000044, 3000008	3000557	3002188	8	0	0	0	0	0	0	0	0	0	0	2	2.27424	18	23.5869	0	0	0	0	0	0	0	0	0	0	0	0	0	0	0	0	0	0	0	0	0	0	3479	1193.92	7	6.56518	0	0	170
CARD_102056_TM_#01	antibiotic inactivation enzyme; MOX-9	cephalosporin, cephamycin, penam	0000032, 0000044, 3000008	3000557	3002191	8	1823	30.2439	0	0	316	33.8863	1818	50.7378	15904	693.516	1392	55.0093	640	29.0921	453	13.0592	9678	324.123	579	26.2056	19	6.07728	1149	440.463	17265	683.226	0	0	36	2.68089	380	56.3318	9559	910.416	98	43.3946	4374	46.1673	5204	168.662	1367	37.8689	2042
RESF_302562_TM_#01	antibiotic inactivation enzyme; mphA	erythromycin, roxithromycin, telithromycin, clarithromycin, azithromycin, dirithromycin, oleandomycin, macrolide antibiotic	0000006, 0000027, 0000057, 0000065, 3000158, 3000176, 3000867, 0000000	3000557	3000316	5	0	0	89	30.0746	0	0	0	0	9	0.397477	0	0	15	0.658389	0	0	0	0	177	7.98656	0	0	0	0	0	0	492	88.9781	0	0	0	0	6	0.57677	0	0	10	0.104521	0	0	0	0	193
RESF_302563_TM_#01	antibiotic inactivation enzyme; mphA	erythromycin, roxithromycin, telithromycin, clarithromycin, azithromycin, dirithromycin, oleandomycin, macrolide antibiotic	0000006, 0000027, 0000057, 0000065, 3000158, 3000176, 3000867, 0000000	3000557	3000316	5	0	0	40	30.0271	0	0	0	0	1	0.100552	0	0	0	0	0	0	0	0	122	12.2517	0	0	0	0	0	0	159	65.3316	0	0	0	0	2	0.410307	0	0	10	0.230121	0	0	0	0	96
RESF_302563_TM_#02	antibiotic inactivation enzyme; mphA	erythromycin, roxithromycin, telithromycin, clarithromycin, azithromycin, dirithromycin, oleandomycin, macrolide antibiotic	0000006, 0000027, 0000057, 0000065, 3000158, 3000176, 3000867, 0000000	3000557	3000316	5	0	0	9	30.0205	0	0	0	0	4	1.73259	0	0	3	0.855976	0	0	0	0	15	5.74106	0	0	0	0	0	0	108	192.669	0	0	0	0	0	0	0	0	0	0	0	0	0	0	12
RESF_302613_TM_#01	antibiotic inactivation enzyme; mphB	erythromycin, roxithromycin, telithromycin, clarithromycin, tylosin, spiramycin, azithromycin, dirithromycin, oleandomycin, macrolide antibiotic	0000006, 0000027, 0000057, 0000065, 3000145, 3000156, 3000158, 3000176, 3000867, 0000000	3000557	3000318	5	6	0.101445	0	0	217	23.4387	74	2.09335	0	0	10	0.398891	292	13.3898	0	0	0	0	10	0.462352	12069	3926.3	0	0	0	0	0	0	0	0	350	52.7039	27	2.57959	5	2.23398	0	0	16	0.517765	0	0	12
CARD_101628_TM_#01	antibiotic inactivation enzyme; mphB	erythromycin, roxithromycin, telithromycin, clarithromycin, tylosin, spiramycin, azithromycin, dirithromycin, oleandomycin, macrolide antibiotic	0000006, 0000027, 0000057, 0000065, 3000145, 3000156, 3000158, 3000176, 3000867, 0000000	3000557	3000318	5	0	0	0	0	3018	326.4	56	1.58786	0	0	4	0.157246	87	3.97699	0	0	0	0	46	2.09948	165	52.0189	0	0	0	0	0	0	5	0.387539	3917	585.495	24	2.28623	79	35.0922	3	0.032217	0	0	0	0	16
RESF_302566_TM_#05	antibiotic inactivation enzyme; mphC	erythromycin, roxithromycin, telithromycin, clarithromycin, tylosin, spiramycin, azithromycin, dirithromycin, oleandomycin, macrolide antibiotic	0000006, 0000027, 0000057, 0000065, 3000145, 3000156, 3000158, 3000176, 3000867, 0000000	3000557	3000319	5	2	0.646714	0	0	0	0	0	0	0	0	0	0	0	0	0	0	0	0	1	0.620525	0	0	0	0	0	0	0	0	0	0	0	0	0	0	0	0	0	0	0	0	0	0	0
RESF_302566_TM_#12	antibiotic inactivation enzyme; mphC	erythromycin, roxithromycin, telithromycin, clarithromycin, tylosin, spiramycin, azithromycin, dirithromycin, oleandomycin, macrolide antibiotic	0000006, 0000027, 0000057, 0000065, 3000145, 3000156, 3000158, 3000176, 3000867, 0000000	3000557	3000319	5	1	0.195974	0	0	0	0	0	0	0	0	0	0	0	0	0	0	0	0	0	0	0	0	0	0	0	0	0	0	0	0	0	0	0	0	7	66.1731	0	0	0	0	0	0	0
RESF_302566_TM_#10	antibiotic inactivation enzyme; mphC	erythromycin, roxithromycin, telithromycin, clarithromycin, tylosin, spiramycin, azithromycin, dirithromycin, oleandomycin, macrolide antibiotic	0000006, 0000027, 0000057, 0000065, 3000145, 3000156, 3000158, 3000176, 3000867, 0000000	3000557	3000319	5	0	0	0	0	0	0	0	0	0	0	0	0	0	0	0	0	0	0	0	0	0	0	0	0	0	0	0	0	0	0	0	0	1	1.3047	6	35.9788	0	0	0	0	0	0	0
CARD_102582_TM_#01	antibiotic inactivation enzyme; mphE	macrolide antibiotic	0	3000557	3003741	5	0	0	943	363.22	8	0.987842	23	0.738243	0	0	29702	1337.76	714	37.0699	20	0.660502	6	0.233808	67028	3484.39	0	0	134	57.7014	18	0.826955	12271	2512.42	0	0	58878	10040	79	8.63875	10	4.99195	277	3.34969	5152	191.633	10	0.323688	830
CARD_100457_TM_#01	antibiotic inactivation enzyme; mphF	macrolide antibiotic	0	3000557	3003071	5	0	0	0	0	0	0	0	0	0	0	0	0	47	2.14975	0	0	0	0	0	0	0	0	0	0	0	0	10	1.74773	0	0	0	0	0	0	0	0	0	0	0	0	0	0	0
CARD_102010_TM_#01	antibiotic inactivation enzyme; mphG	macrolide antibiotic	0	3000557	3003742	5	0	0	31	10.7052	0	0	0	0	0	0	0	0	34	1.55721	0	0	0	0	10	0.470363	8	2.7021	0	0	0	0	69	12.468	0	0	205	31.2813	69	6.76851	0	0	2327	25.2443	0	0	0	0	0
CARD_102165_TM_#01	antibiotic inactivation enzyme; mphI	macrolide antibiotic	0	3000557	3003991	5	0	0	0	0	0	0	0	0	0	0	0	0	10	0.462428	0	0	0	0	0	0	0	0	0	0	0	0	0	0	0	0	0	0	0	0	0	0	4	0.042184	0	0	0	0	6
CARD_102587_TM_#01	antibiotic inactivation enzyme; mphJ	macrolide antibiotic	0	3000557	3004544	5	0	0	0	0	0	0	0	0	0	0	0	0	0	0	0	0	0	0	0	0	0	0	0	0	0	0	0	0	0	0	0	0	0	0	0	0	0	0	0	0	0	0	0
CARD_102584_TM_#01	antibiotic inactivation enzyme; mphK	macrolide antibiotic	0	3000557	3004541	5	0	0	60	19.9679	0	0	4	0.111542	0	0	0	0	0	0	0	0	0	0	7	0.323646	0	0	0	0	0	0	0	0	0	0	0	0	0	0	0	0	0	0	0	0	0	0	0
CARD_102258_TM_#01	antibiotic inactivation enzyme; mphL	macrolide antibiotic	0	3000557	3003072	5	0	0	8	2.72081	0	0	16	0.444611	136	5.93031	0	0	6	0.266355	10	0.291371	0	0	8	0.369882	0	0	0	0	8	0.311636	0	0	0	0	0	0	0	0	0	0	0	0	4	0.132407	0	0	126
CARD_102031_TM_#11	antibiotic inactivation enzyme; mphM	macrolide antibiotic	0	3000557	3003767	5	3	0.431143	0	0	459	463.936	74	19.4135	1	0.375395	4	1.36454	60	26.2147	0	0	0	0	25	10.3156	2422	7283.51	0	0	0	0	0	0	2	2.19024	722	964.756	33	28.3562	84	323.331	0	0	5	1.40682	0	0	29
CARD_102031_TM_#12	antibiotic inactivation enzyme; mphM	macrolide antibiotic	0	3000557	3003767	5	0	0	0	0	0	0	0	0	0	0	4	1.36454	0	0	0	0	0	0	0	0	0	0	0	0	0	0	0	0	0	0	0	0	0	0	0	0	0	0	0	0	0	0	0
CARD_102585_TM_#01	antibiotic inactivation enzyme; mphN	macrolide antibiotic	0	3000557	3004542	5	14	0.229092	0	0	2	0.221867	828	23.6461	133	5.93608	446	17.9402	88603	4099.7	94	2.77999	0	0	15	0.699831	29	9.63046	0	0	0	0	0	0	0	0	114	17.3965	0	0	166	74.31	234	2.51226	25	0.837655	0	0	8928
CARD_102586_TM_#01	antibiotic inactivation enzyme; mphO	macrolide antibiotic	0	3000557	3004543	5	0	0	0	0	0	0	4	0.11058	0	0	7	0.280883	12	0.552859	0	0	0	0	0	0	2	0.659631	0	0	0	0	0	0	0	0	0	0	0	0	0	0	0	0	0	0	0	0	0
CARD_102001_TM_#01	antibiotic inactivation enzyme; MSI-1	carbapenem	20	3000557	3003718	7	0	0	0	0	0	0	0	0	0	0	0	0	258	11.7792	2	0.057913	0	0	0	0	0	0	0	0	0	0	0	0	0	0	113	16.9328	0	0	0	0	0	0	0	0	0	0	11
CARD_102002_TM_#01	antibiotic inactivation enzyme; MSI-OXA	carbapenem	20	3000557	3003719	6	0	0	0	0	0	0	0	0	0	0	0	0	973	49.7812	0	0	0	0	0	0	0	0	0	0	0	0	0	0	0	0	464	78.292	0	0	0	0	0	0	0	0	0	0	84
CARD_100399_TM_#02	antibiotic inactivation enzyme; OCH-1	monobactam, cephalosporin, cephamycin, penam, penem	0000004, 0000032, 0000044, 3000008, 3003706	3000557	3002514	6	0	0	0	0	0	0	0	0	0	0	0	0	8	5.54986	0	0	0	0	0	0	0	0	0	0	0	0	0	0	0	0	0	0	0	0	0	0	121	24.5203	0	0	0	0	0
CARD_100399_TM_#11	antibiotic inactivation enzyme; OCH-1	monobactam, cephalosporin, cephamycin, penam, penem	0000004, 0000032, 0000044, 3000008, 3003706	3000557	3002514	6	0	0	0	0	0	0	0	0	0	0	0	0	12	8.66457	0	0	0	0	0	0	0	0	0	0	0	0	0	0	0	0	0	0	0	0	0	0	163	19.4981	0	0	0	0	0
CARD_100399_TM_#14	antibiotic inactivation enzyme; OCH-1	monobactam, cephalosporin, cephamycin, penam, penem	0000004, 0000032, 0000044, 3000008, 3003706	3000557	3002514	6	0	0	0	0	0	0	0	0	0	0	0	0	2	0.813341	0	0	0	0	0	0	0	0	0	0	0	0	0	0	0	0	0	0	1	0.854806	0	0	164	15.558	0	0	0	0	0
CARD_100399_TM_#15	antibiotic inactivation enzyme; OCH-1	monobactam, cephalosporin, cephamycin, penam, penem	0000004, 0000032, 0000044, 3000008, 3003706	3000557	3002514	6	0	0	0	0	0	0	0	0	0	0	0	0	10	4.98315	0	0	0	0	0	0	0	0	0	0	0	0	0	0	0	0	0	0	0	0	0	0	79	8.67475	0	0	0	0	0
CARD_100399_TM_#07	antibiotic inactivation enzyme; OCH-1	monobactam, cephalosporin, cephamycin, penam, penem	0000004, 0000032, 0000044, 3000008, 3003706	3000557	3002514	6	0	0	0	0	0	0	0	0	0	0	0	0	0	0	0	0	0	0	0	0	0	0	0	0	0	0	0	0	0	0	0	0	2	1.54934	0	0	471	46.6531	0	0	0	0	0
CARD_100399_TM_#03	antibiotic inactivation enzyme; OCH-1	monobactam, cephalosporin, cephamycin, penam, penem	0000004, 0000032, 0000044, 3000008, 3003706	3000557	3002514	6	0	0	0	0	0	0	0	0	0	0	0	0	0	0	0	0	0	0	0	0	0	0	0	0	0	0	0	0	0	0	0	0	0	0	0	0	223	23.2119	0	0	0	0	0
CARD_100399_TM_#04	antibiotic inactivation enzyme; OCH-1	monobactam, cephalosporin, cephamycin, penam, penem	0000004, 0000032, 0000044, 3000008, 3003706	3000557	3002514	6	0	0	0	0	0	0	0	0	0	0	0	0	0	0	0	0	0	0	0	0	0	0	0	0	0	0	0	0	0	0	0	0	0	0	0	0	166	28.3911	0	0	0	0	0
CARD_100399_TM_#10	antibiotic inactivation enzyme; OCH-1	monobactam, cephalosporin, cephamycin, penam, penem	0000004, 0000032, 0000044, 3000008, 3003706	3000557	3002514	6	0	0	0	0	0	0	0	0	0	0	0	0	0	0	0	0	0	0	0	0	0	0	0	0	0	0	0	0	0	0	0	0	0	0	0	0	34	17.3188	0	0	0	0	0
CARD_100399_TM_#12	antibiotic inactivation enzyme; OCH-1	monobactam, cephalosporin, cephamycin, penam, penem	0000004, 0000032, 0000044, 3000008, 3003706	3000557	3002514	6	0	0	0	0	0	0	0	0	0	0	0	0	0	0	0	0	0	0	0	0	0	0	0	0	0	0	0	0	0	0	0	0	0	0	0	0	114	16.3153	0	0	0	0	0
CARD_101282_TM_#01	antibiotic inactivation enzyme; oleD	erythromycin, tylosin, macrolide antibiotic	0000006, 3000145, 0000000	3000557	3000865	6	0	0	0	0	0	0	0	0	11	0.463318	0	0	10	0.441702	0	0	0	0	11	0.501542	0	0	0	0	0	0	0	0	0	0	0	0	0	0	0	0	0	0	0	0	0	0	0
CARD_101719_TM_#01	antibiotic inactivation enzyme; oleI	oleandomycin, macrolide antibiotic	3000867, 0000000	3000557	3000866	6	0	0	0	0	0	0	0	0	0	0	0	0	0	0	0	0	0	0	12	0.526599	0	0	0	0	0	0	0	0	0	0	0	0	0	0	0	0	0	0	0	0	0	0	0
NCBI_201387_TM_#03	antibiotic inactivation enzyme; OXA beta-lactamase	carbapenem, cephalosporin, penam	0000020, 0000032, 3000008	3000557	3000017	5	269	113.285	0	0	75	208.035	345	334.574	645	1579.47	119	149.038	6	12.5797	72	101.639	1447	2295.7	9	22.27	22	114.943	40	701.544	2288	2506.03	0	0	162	210.764	0	0	337	1383.88	5	189.888	4071	1771.63	701	975.723	153	180.434	376
CARD_102931_TM_#01	antibiotic inactivation enzyme; OXA beta-lactamase	carbapenem, cephalosporin, penam	0000020, 0000032, 3000008	3000557	3000017	5	12	3.78564	0	0	486	610.843	356	125.193	166	86.085	15676	8315.31	38332	24087.2	804	288.495	17	7.60364	0	0	2454	10723.2	25	104.177	0	0	0	0	0	0	9491	17100	9	9.6292	15409	83511.1	104870	14928.4	2454	983.971	15	4.51564	1863
CARD_102924_TM_#07	antibiotic inactivation enzyme; OXA beta-lactamase	carbapenem, cephalosporin, penam	0000020, 0000032, 3000008	3000557	3000017	5	0	0	0	0	258	332.778	371	129.958	258	147.24	1046	527.821	20424	12013.2	489	174.823	20	7.00155	0	0	2253	8590.9	0	0	0	0	0	0	0	0	4112	6843.59	3	2.97472	237	1268.96	6924	888.853	3421	1342.88	0	0	3309
CARD_102931_TM_#06	antibiotic inactivation enzyme; OXA beta-lactamase	carbapenem, cephalosporin, penam	0000020, 0000032, 3000008	3000557	3000017	5	0	0	0	0	849	848.38	762	213.605	267	100.846	36349	13751.4	57712	25298.9	1603	415.863	3	0.814675	0	0	38	111.057	0	0	0	0	0	0	0	0	14414	18765.9	46	57.5015	28588	114657	156834	15692.7	5859	1783.16	73	28.7287	3478
NCBI_203819_TM_#09	antibiotic inactivation enzyme; OXA beta-lactamase	carbapenem, cephalosporin, penam	0000020, 0000032, 3000008	3000557	3000017	5	0	0	0	0	0	0	1	0.221676	0	0	0	0	1761	756.47	0	0	0	0	0	0	0	0	0	0	0	0	0	0	0	0	68	80.8716	0	0	0	0	109	10.0164	2	0.657736	10	2.31974	4091
NCBI_201387_TM_#13	antibiotic inactivation enzyme; OXA beta-lactamase	carbapenem, cephalosporin, penam	0000020, 0000032, 3000008	3000557	3000017	5	0	0	0	0	0	0	2	0.471956	1005	397.075	147	56.544	30	13.9957	0	0	21	8.02579	16	6.08928	0	0	38	188.66	729	260.005	0	0	0	0	0	0	27	23.5209	32	135.378	7461	803.639	82	25.4245	0	0	332
CARD_102395_TM_#02	antibiotic inactivation enzyme; OXA beta-lactamase	carbapenem, cephalosporin, penam	0000020, 0000032, 3000008	3000557	3000017	5	0	0	0	0	0	0	3	0.737012	1353	551.336	37	12.7926	68539	31073.7	358	96.3814	3256	1066.93	0	0	0	0	0	0	233	80.8922	0	0	0	0	219	298.546	32	27.7054	5	18.9888	38241	3748.83	12575	3989.51	13555	3627.12	12204
CARD_102177_TM_#02	antibiotic inactivation enzyme; OXA beta-lactamase	carbapenem, cephalosporin, penam	0000020, 0000032, 3000008	3000557	3000017	5	0	0	0	0	0	0	0	0	35	15.1714	0	0	61	29.0918	0	0	0	0	0	0	0	0	0	0	0	0	0	0	0	0	0	0	0	0	0	0	4517	550.358	3	0.973955	0	0	670
CARD_102177_TM_#03	antibiotic inactivation enzyme; OXA beta-lactamase	carbapenem, cephalosporin, penam	0000020, 0000032, 3000008	3000557	3000017	5	0	0	0	0	0	0	0	0	13	12.2272	0	0	31	35.366	0	0	0	0	0	0	0	0	0	0	0	0	0	0	0	0	0	0	0	0	0	0	276	105.339	7	15.8971	0	0	199
CARD_102177_TM_#06	antibiotic inactivation enzyme; OXA beta-lactamase	carbapenem, cephalosporin, penam	0000020, 0000032, 3000008	3000557	3000017	5	0	0	0	0	0	0	0	0	18	6.41224	0	0	2	0.693732	0	0	0	0	0	0	0	0	0	0	0	0	0	0	0	0	0	0	0	0	0	0	6	0.522199	3	0.744789	0	0	476
CARD_102924_TM_#08	antibiotic inactivation enzyme; OXA beta-lactamase	carbapenem, cephalosporin, penam	0000020, 0000032, 3000008	3000557	3000017	5	0	0	0	0	0	0	0	0	21	7.3943	0	0	12	4.42254	0	0	2	0.543117	0	0	0	0	0	0	0	0	0	0	0	0	0	0	0	0	0	0	81	7.17509	1	0.26378	0	0	509
CARD_102924_TM_#10	antibiotic inactivation enzyme; OXA beta-lactamase	carbapenem, cephalosporin, penam	0000020, 0000032, 3000008	3000557	3000017	5	0	0	0	0	0	0	0	0	7	2.76871	0	0	23	8.74997	0	0	2	0.560637	0	0	0	0	0	0	0	0	0	0	0	0	0	0	0	0	0	0	209	21.8172	12	3.93581	0	0	476
CARD_102395_TM_#04	antibiotic inactivation enzyme; OXA beta-lactamase	carbapenem, cephalosporin, penam	0000020, 0000032, 3000008	3000557	3000017	5	0	0	0	0	0	0	0	0	97	55.8859	0	0	201	142.403	0	0	0	0	0	0	0	0	0	0	0	0	0	0	0	0	0	0	0	0	0	0	1527	227.025	15	5.7788	19	6.24404	351
CARD_102420_TM_#05	antibiotic inactivation enzyme; OXA beta-lactamase	carbapenem, cephalosporin, penam	0000020, 0000032, 3000008	3000557	3000017	5	0	0	0	0	0	0	0	0	10	13.5142	0	0	0	0	0	0	0	0	0	0	0	0	0	0	0	0	0	0	0	0	0	0	0	0	0	0	16	5.25782	0	0	0	0	10
RESF_300443_TM_#03	antibiotic inactivation enzyme; OXA beta-lactamase	carbapenem, cephalosporin, penam	0000020, 0000032, 3000008	3000557	3000017	5	0	0	0	0	0	0	0	0	23	4.23568	0	0	32	5.40548	0	0	2	0.289662	0	0	0	0	0	0	0	0	0	0	0	0	0	0	0	0	0	0	369	15.4256	15	1.89535	0	0	431
RESF_300443_TM_#04	antibiotic inactivation enzyme; OXA beta-lactamase	carbapenem, cephalosporin, penam	0000020, 0000032, 3000008	3000557	3000017	5	0	0	0	0	0	0	0	0	5	9.49529	0	0	4	7.8623	0	0	0	0	0	0	0	0	0	0	0	0	0	0	0	0	0	0	0	0	0	0	17	5.39635	2	2.81365	0	0	135
NCBI_203819_TM_#07	antibiotic inactivation enzyme; OXA beta-lactamase	carbapenem, cephalosporin, penam	0000020, 0000032, 3000008	3000557	3000017	5	0	0	0	0	0	0	0	0	0	0	2	2.36171	423	582.07	0	0	0	0	0	0	0	0	0	0	0	0	0	0	0	0	17	65.411	0	0	0	0	25	7.38209	2	1.68819	6	4.33095	945
NCBI_202915_TM_#02	antibiotic inactivation enzyme; OXA beta-lactamase	carbapenem, cephalosporin, penam	0000020, 0000032, 3000008	3000557	3000017	5	0	0	0	0	0	0	0	0	0	0	1	0.511703	0	0	0	0	0	0	0	0	0	0	0	0	0	0	0	0	0	0	0	0	0	0	0	0	0	0	0	0	0	0	0
NCBI_203819_TM_#03	antibiotic inactivation enzyme; OXA beta-lactamase	carbapenem, cephalosporin, penam	0000020, 0000032, 3000008	3000557	3000017	5	0	0	0	0	0	0	0	0	0	0	0	0	565	320.682	0	0	0	0	0	0	0	0	0	0	0	0	0	0	0	0	23	39.6579	0	0	0	0	26	3.39027	2	0.733995	12	3.95434	1363
NCBI_203819_TM_#04	antibiotic inactivation enzyme; OXA beta-lactamase	carbapenem, cephalosporin, penam	0000020, 0000032, 3000008	3000557	3000017	5	0	0	0	0	0	0	0	0	0	0	0	0	787	802.717	0	0	0	0	0	0	0	0	0	0	0	0	0	0	0	0	44	141.633	0	0	0	0	28	7.26872	7	4.85354	7	6.31597	1704
NCBI_203819_TM_#05	antibiotic inactivation enzyme; OXA beta-lactamase	carbapenem, cephalosporin, penam	0000020, 0000032, 3000008	3000557	3000017	5	0	0	0	0	0	0	0	0	0	0	0	0	601	669.252	0	0	0	0	0	0	0	0	0	0	0	0	0	0	0	0	57	146.754	0	0	0	0	19	3.56413	5	2.81365	9	27.4293	1430
NCBI_203819_TM_#10	antibiotic inactivation enzyme; OXA beta-lactamase	carbapenem, cephalosporin, penam	0000020, 0000032, 3000008	3000557	3000017	5	0	0	0	0	0	0	0	0	0	0	0	0	448	327.095	0	0	0	0	0	0	0	0	0	0	0	0	0	0	0	0	29	55.8907	0	0	0	0	6	0.821534	7	2.95433	35	12.6381	1198
CARD_102395_TM_#03	antibiotic inactivation enzyme; OXA beta-lactamase	carbapenem, cephalosporin, penam	0000020, 0000032, 3000008	3000557	3000017	5	0	0	0	0	0	0	0	0	0	0	0	0	8	5.84152	0	0	0	0	0	0	0	0	0	0	0	0	0	0	0	0	0	0	0	0	0	0	67	11.1189	0	0	0	0	55
CARD_102420_TM_#10	antibiotic inactivation enzyme; OXA beta-lactamase	carbapenem, cephalosporin, penam	0000020, 0000032, 3000008	3000557	3000017	5	0	0	0	0	0	0	0	0	0	0	0	0	6	2.94836	0	0	0	0	0	0	0	0	0	0	0	0	0	0	0	0	0	0	0	0	0	0	79	10.6778	0	0	0	0	2
NCBI_203045_TM_#01	antibiotic inactivation enzyme; OXA beta-lactamase	carbapenem, cephalosporin, penam	0000020, 0000032, 3000008	3000557	3000017	5	0	0	0	0	0	0	0	0	0	0	0	0	0	0	0	0	0	0	0	0	0	0	8	23.505	0	0	0	0	0	0	0	0	0	0	0	0	0	0	0	0	0	0	0
CARD_102921_TM_#03	antibiotic inactivation enzyme; OXA beta-lactamase	carbapenem, cephalosporin, penam	0000020, 0000032, 3000008	3000557	3000017	5	0	0	0	0	0	0	0	0	0	0	0	0	0	0	0	0	0	0	0	0	0	0	0	0	0	0	0	0	5	7.76266	0	0	0	0	0	0	0	0	0	0	0	0	0
NCBI_202915_TM_#06	antibiotic inactivation enzyme; OXA beta-lactamase	carbapenem, cephalosporin, penam	0000020, 0000032, 3000008	3000557	3000017	5	0	0	0	0	0	0	0	0	0	0	0	0	0	0	0	0	0	0	0	0	0	0	0	0	0	0	0	0	0	0	0	0	4	8.26312	0	0	0	0	0	0	0	0	0
RESF_300443_TM_#05	antibiotic inactivation enzyme; OXA beta-lactamase	carbapenem, cephalosporin, penam	0000020, 0000032, 3000008	3000557	3000017	5	0	0	0	0	0	0	0	0	0	0	0	0	0	0	0	0	0	0	0	0	0	0	0	0	0	0	0	0	0	0	0	0	0	0	2	15.8976	61	13.8198	0	0	0	0	0
CARD_102177_TM_#04	antibiotic inactivation enzyme; OXA beta-lactamase	carbapenem, cephalosporin, penam	0000020, 0000032, 3000008	3000557	3000017	5	0	0	0	0	0	0	0	0	0	0	0	0	0	0	0	0	0	0	0	0	0	0	0	0	0	0	0	0	0	0	0	0	0	0	0	0	26	9.3241	0	0	0	0	119
RESF_301665_TM_#05	antibiotic inactivation enzyme; OXA beta-lactamase	carbapenem, cephalosporin, penam	0000020, 0000032, 3000008	3000557	3000017	5	0	0	0	0	0	0	0	0	0	0	0	0	0	0	0	0	0	0	0	0	0	0	0	0	0	0	0	0	0	0	0	0	0	0	0	0	2	0.444072	0	0	0	0	0
CARD_102420_TM_#09	antibiotic inactivation enzyme; OXA beta-lactamase	carbapenem, cephalosporin, penam	0000020, 0000032, 3000008	3000557	3000017	5	0	0	0	0	0	0	0	0	0	0	0	0	0	0	0	0	0	0	0	0	0	0	0	0	0	0	0	0	0	0	0	0	0	0	0	0	2	0.183589	0	0	0	0	1
RESF_300443_TM_#06	antibiotic inactivation enzyme; OXA beta-lactamase	carbapenem, cephalosporin, penam	0000020, 0000032, 3000008	3000557	3000017	5	0	0	0	0	0	0	0	0	0	0	0	0	0	0	0	0	0	0	0	0	0	0	0	0	0	0	0	0	0	0	0	0	0	0	0	0	1	0.0944292	0	0	0	0	0
CARD_102420_TM_#12	antibiotic inactivation enzyme; OXA beta-lactamase	carbapenem, cephalosporin, penam	0000020, 0000032, 3000008	3000557	3000017	5	0	0	0	0	0	0	0	0	0	0	0	0	0	0	0	0	0	0	0	0	0	0	0	0	0	0	0	0	0	0	0	0	0	0	0	0	0	0	0	0	0	0	30
NCBI_202713_TM_#01	antibiotic inactivation enzyme; OXA-12	carbapenem, cephalosporin, penam	0000020, 0000032, 3000008	3000557	3001407	6	1321	306.428	0	0	86	95.8147	6614	2399.04	7079	3637.82	432	214.234	9213	5432.39	187	66.505	2733	1120.25	2793	1692.76	31	114.238	4227	20100.2	4095	2327.26	0	0	28	43.9223	2226	4160.88	27472	33124.5	79	437.51	12945	1750.01	5084	2147.27	569	208.214	4874
NCBI_202713_TM_#09	antibiotic inactivation enzyme; OXA-12	carbapenem, cephalosporin, penam	0000020, 0000032, 3000008	3000557	3001407	6	1956	332.825	0	0	53	49.1917	7854	2235.93	8889	3777.05	589	245.603	14373	6783.43	256	72.3302	4417	1485.25	3998	1954.85	68	249.154	4463	17471.5	5928	2407.67	14	21.668	30	20.1696	2127	3102.13	39736	38564	47	197.75	17788	1938.82	7000	2389.85	841	256.067	6503
CARD_102050_TM_#05	antibiotic inactivation enzyme; OXA-137	carbapenem, cephalosporin, penam	0000020, 0000032, 3000008	3000557	3001767	6	0	0	0	0	0	0	0	0	0	0	0	0	0	0	0	0	0	0	0	0	5	14.0172	0	0	38	14.5634	4	6.20824	198	156.224	0	0	11	9.16455	0	0	0	0	0	0	0	0	0
CARD_102050_TM_#03	antibiotic inactivation enzyme; OXA-137	carbapenem, cephalosporin, penam	0000020, 0000032, 3000008	3000557	3001767	6	0	0	0	0	0	0	0	0	0	0	0	0	0	0	0	0	0	0	0	0	0	0	0	0	2	0.975719	0	0	20	20.178	0	0	0	0	0	0	0	0	0	0	0	0	0
CARD_102050_TM_#04	antibiotic inactivation enzyme; OXA-137	carbapenem, cephalosporin, penam	0000020, 0000032, 3000008	3000557	3001767	6	0	0	0	0	0	0	0	0	0	0	0	0	0	0	0	0	0	0	0	0	0	0	0	0	13	5.79068	0	0	60	55.7663	0	0	0	0	0	0	0	0	0	0	0	0	0
CARD_102050_TM_#12	antibiotic inactivation enzyme; OXA-137	carbapenem, cephalosporin, penam	0000020, 0000032, 3000008	3000557	3001767	6	0	0	0	0	0	0	0	0	0	0	0	0	0	0	0	0	0	0	0	0	0	0	0	0	42	21.0638	0	0	110	102.413	0	0	0	0	0	0	0	0	0	0	0	0	0
CARD_102449_TM_#01	antibiotic inactivation enzyme; OXA-153	carbapenem, cephalosporin, penam	0000020, 0000032, 3000008	3000557	3001458	6	1	0.0176698	0	0	0	0	0	0	0	0	0	0	0	0	0	0	0	0	0	0	0	0	0	0	0	0	0	0	0	0	0	0	0	0	0	0	2	0.0217337	0	0	0	0	0
CARD_102467_TM_#02	antibiotic inactivation enzyme; OXA-154	carbapenem, cephalosporin, penam	0000020, 0000032, 3000008	3000557	3001459	6	1	0.862285	0	0	0	0	0	0	0	0	0	0	0	0	0	0	0	0	0	0	1	16.8206	0	0	0	0	0	0	0	0	0	0	0	0	0	0	0	0	0	0	0	0	0
CARD_102467_TM_#01	antibiotic inactivation enzyme; OXA-154	carbapenem, cephalosporin, penam	0000020, 0000032, 3000008	3000557	3001459	6	0	0	0	0	0	0	0	0	0	0	0	0	0	0	0	0	0	0	0	0	0	0	0	0	0	0	0	0	0	0	0	0	0	0	0	0	26	0.374583	0	0	0	0	0
CARD_101011_TM_#01	antibiotic inactivation enzyme; OXA-164	carbapenem, cephalosporin, penam	0000020, 0000032, 3000008	3000557	3001662	6	0	0	0	0	0	0	0	0	0	0	1	0.538635	0	0	0	0	0	0	0	0	0	0	0	0	0	0	0	0	0	0	162	390.732	0	0	0	0	0	0	0	0	0	0	0
CARD_101011_TM_#02	antibiotic inactivation enzyme; OXA-164	carbapenem, cephalosporin, penam	0000020, 0000032, 3000008	3000557	3001662	6	0	0	0	0	0	0	0	0	0	0	3	1.02341	0	0	0	0	0	0	0	0	0	0	0	0	0	0	0	0	0	0	526	745.096	0	0	0	0	0	0	0	0	0	0	0
CARD_101011_TM_#03	antibiotic inactivation enzyme; OXA-164	carbapenem, cephalosporin, penam	0000020, 0000032, 3000008	3000557	3001662	6	0	0	0	0	0	0	0	0	0	0	12	5.59396	0	0	0	0	0	0	0	0	0	0	0	0	0	0	0	0	0	0	384	870.455	0	0	0	0	0	0	0	0	0	0	0
CARD_101011_TM_#05	antibiotic inactivation enzyme; OXA-164	carbapenem, cephalosporin, penam	0000020, 0000032, 3000008	3000557	3001662	6	0	0	0	0	0	0	0	0	0	0	8	4.66868	0	0	0	0	0	0	0	0	0	0	0	0	0	0	0	0	0	0	699	1528.55	0	0	0	0	0	0	0	0	0	0	0
CARD_101011_TM_#06	antibiotic inactivation enzyme; OXA-164	carbapenem, cephalosporin, penam	0000020, 0000032, 3000008	3000557	3001662	6	0	0	0	0	0	0	0	0	0	0	14	9.00408	0	0	0	0	0	0	0	0	0	0	0	0	0	0	0	0	0	0	854	1271.74	0	0	0	0	0	0	0	0	0	0	0
CARD_101011_TM_#07	antibiotic inactivation enzyme; OXA-164	carbapenem, cephalosporin, penam	0000020, 0000032, 3000008	3000557	3001662	6	0	0	0	0	0	0	0	0	0	0	2	2.92402	0	0	0	0	0	0	0	0	0	0	0	0	0	0	0	0	0	0	571	2668.93	0	0	0	0	0	0	0	0	0	0	0
CARD_101011_TM_#08	antibiotic inactivation enzyme; OXA-164	carbapenem, cephalosporin, penam	0000020, 0000032, 3000008	3000557	3001662	6	0	0	0	0	0	0	0	0	0	0	2	0.682271	0	0	0	0	0	0	0	0	0	0	0	0	0	0	0	0	0	0	834	1193.6	0	0	0	0	0	0	0	0	0	0	0
CARD_100947_TM_#01	antibiotic inactivation enzyme; OXA-18	carbapenem, cephalosporin, penam	0000020, 0000032, 3000008	3000557	3001413	6	0	0	0	0	0	0	0	0	0	0	0	0	36	1.82071	0	0	0	0	0	0	0	0	0	0	0	0	0	0	0	0	0	0	0	0	0	0	0	0	0	0	0	0	0
NCBI_206614_TM_#03	antibiotic inactivation enzyme; OXA-184	carbapenem, cephalosporin, penam	0000020, 0000032, 3000008	3000557	3001476	6	0	0	0	0	0	0	0	0	0	0	1	0.444959	0	0	0	0	0	0	0	0	0	0	0	0	0	0	0	0	0	0	0	0	0	0	0	0	0	0	0	0	0	0	0
NCBI_206614_TM_#01	antibiotic inactivation enzyme; OXA-184	carbapenem, cephalosporin, penam	0000020, 0000032, 3000008	3000557	3001476	6	0	0	0	0	0	0	0	0	0	0	0	0	0	0	0	0	0	0	0	0	0	0	0	0	0	0	0	0	0	0	0	0	6	10.624	0	0	0	0	0	0	0	0	0
NCBI_206614_TM_#05	antibiotic inactivation enzyme; OXA-184	carbapenem, cephalosporin, penam	0000020, 0000032, 3000008	3000557	3001476	6	0	0	0	0	0	0	0	0	0	0	0	0	0	0	0	0	0	0	0	0	0	0	0	0	0	0	0	0	0	0	0	0	5	4.18474	0	0	0	0	0	0	0	0	0
CARD_100714_TM_#01	antibiotic inactivation enzyme; OXA-198	carbapenem, cephalosporin, penam	0000020, 0000032, 3000008	3000557	3001805	6	0	0	0	0	27	3.46431	0	0	0	0	0	0	0	0	0	0	0	0	0	0	0	0	0	0	0	0	0	0	4	0.370087	0	0	0	0	0	0	0	0	0	0	0	0	0
CARD_101412_TM_#01	antibiotic inactivation enzyme; OXA-209	carbapenem, cephalosporin, penam	0000020, 0000032, 3000008	3000557	3001809	6	0	0	0	0	0	0	0	0	0	0	0	0	52	2.64511	0	0	0	0	0	0	0	0	0	0	0	0	0	0	0	0	186	30.9534	0	0	0	0	0	0	0	0	0	0	0
NCBI_202317_TM_#01	antibiotic inactivation enzyme; OXA-21	carbapenem, cephalosporin, penam	0000020, 0000032, 3000008	3000557	3001416	6	0	0	0	0	0	0	0	0	0	0	0	0	0	0	0	0	0	0	0	0	0	0	0	0	0	0	0	0	0	0	0	0	1	0.112169	0	0	2	0.0240566	0	0	0	0	0
CARD_102511_TM_#10	antibiotic inactivation enzyme; OXA-212	carbapenem, cephalosporin, penam	0000020, 0000032, 3000008	3000557	3001711	6	5	0.67366	0	0	0	0	7	1.63619	1710	682.939	121	45.7176	92677	41065.7	706	184.962	4367	1372.47	0	0	11	38.1647	0	0	30	9.60473	0	0	0	0	277	384.3	43	42.5441	11	42.0127	159	15.7714	20417	6301.06	17714	4563.98	15116
CARD_102511_TM_#08	antibiotic inactivation enzyme; OXA-212	carbapenem, cephalosporin, penam	0000020, 0000032, 3000008	3000557	3001711	6	0	0	9	24.4202	0	0	5	1.14302	1237	460.922	64	23.5758	63503	27334.4	481	120.633	3375	1028.03	0	0	0	0	0	0	103	33.0784	14	20.3443	0	0	229	287.611	15	14.0301	2	7.1208	34125	3423.57	11910	3604.4	12589	3136.68	10098
NCBI_203641_TM_#04	antibiotic inactivation enzyme; OXA-215	carbapenem, cephalosporin, penam	0000020, 0000032, 3000008	3000557	3001714	6	0	0	0	0	0	0	0	0	2	0.69661	0	0	4	1.56814	0	0	0	0	0	0	0	0	0	0	0	0	0	0	0	0	0	0	0	0	0	0	295	27.6513	0	0	0	0	2
NCBI_201936_TM_#06	antibiotic inactivation enzyme; OXA-22	carbapenem, cephalosporin, penam	0000020, 0000032, 3000008	3000557	3001417	6	0	0	0	0	0	0	0	0	0	0	0	0	0	0	0	0	0	0	0	0	0	0	0	0	0	0	0	0	0	0	2	5.01874	0	0	0	0	0	0	0	0	0	0	0
NCBI_201936_TM_#09	antibiotic inactivation enzyme; OXA-22	carbapenem, cephalosporin, penam	0000020, 0000032, 3000008	3000557	3001417	6	0	0	0	0	0	0	0	0	0	0	0	0	0	0	0	0	0	0	0	0	0	0	0	0	0	0	0	0	0	0	0	0	0	0	0	0	1	0.101424	0	0	0	0	0
CARD_102913_TM_#04	antibiotic inactivation enzyme; OXA-226	carbapenem, cephalosporin, penam	0000020, 0000032, 3000008	3000557	3001800	6	0	0	0	0	0	0	0	0	0	0	0	0	9	3.79075	0	0	0	0	0	0	0	0	0	0	0	0	0	0	10	7.17044	0	0	24	22.7224	0	0	0	0	0	0	0	0	1
CARD_102913_TM_#05	antibiotic inactivation enzyme; OXA-226	carbapenem, cephalosporin, penam	0000020, 0000032, 3000008	3000557	3001800	6	0	0	0	0	0	0	0	0	0	0	0	0	33	13.223	0	0	0	0	0	0	0	0	0	0	0	0	0	0	0	0	0	0	0	0	0	0	0	0	0	0	0	0	0
CARD_102913_TM_#10	antibiotic inactivation enzyme; OXA-226	carbapenem, cephalosporin, penam	0000020, 0000032, 3000008	3000557	3001800	6	0	0	0	0	0	0	0	0	0	0	0	0	5	14.7418	0	0	0	0	0	0	0	0	0	0	0	0	0	0	0	0	0	0	8	10.5108	0	0	0	0	0	0	0	0	0
CARD_102913_TM_#11	antibiotic inactivation enzyme; OXA-226	carbapenem, cephalosporin, penam	0000020, 0000032, 3000008	3000557	3001800	6	0	0	0	0	0	0	0	0	0	0	0	0	7	3.59685	0	0	0	0	0	0	0	0	0	0	0	0	0	0	0	0	9	15.0562	9	14.0748	0	0	0	0	1	0.366998	0	0	0
CARD_102283_TM_#11	antibiotic inactivation enzyme; OXA-229	carbapenem, cephalosporin, penam	0000020, 0000032, 3000008	3000557	3001692	6	1	0.143714	0	0	0	0	0	0	109	44.3482	0	0	88	39.99	8	2.00319	0	0	0	0	0	0	0	0	0	0	0	0	0	0	5	6.41284	0	0	0	0	362	39.8789	558	172.34	9	2.16818	636
CARD_102283_TM_#03	antibiotic inactivation enzyme; OXA-229	carbapenem, cephalosporin, penam	0000020, 0000032, 3000008	3000557	3001692	6	0	0	0	0	0	0	0	0	0	0	1	0.465185	106	71.1169	0	0	0	0	0	0	0	0	0	0	0	0	0	0	0	0	0	0	0	0	0	0	386	58.943	0	0	0	0	744
CARD_102283_TM_#02	antibiotic inactivation enzyme; OXA-229	carbapenem, cephalosporin, penam	0000020, 0000032, 3000008	3000557	3001692	6	0	0	0	0	0	0	0	0	0	0	0	0	140	92.4262	0	0	0	0	0	0	0	0	0	0	0	0	0	0	0	0	0	0	0	0	0	0	435	57.4617	0	0	0	0	756
CARD_102283_TM_#05	antibiotic inactivation enzyme; OXA-229	carbapenem, cephalosporin, penam	0000020, 0000032, 3000008	3000557	3001692	6	0	0	0	0	0	0	0	0	0	0	0	0	200	249.76	0	0	0	0	0	0	0	0	0	0	0	0	0	0	0	0	0	0	0	0	0	0	309	86.9514	6	4.9012	0	0	613
CARD_102283_TM_#06	antibiotic inactivation enzyme; OXA-229	carbapenem, cephalosporin, penam	0000020, 0000032, 3000008	3000557	3001692	6	0	0	0	0	0	0	0	0	0	0	0	0	141	139.93	0	0	0	0	0	0	0	0	0	0	0	0	0	0	0	0	0	0	0	0	0	0	338	104.593	0	0	0	0	703
CARD_102470_TM_#01	antibiotic inactivation enzyme; OXA-232	carbapenem, cephalosporin, penam	0000020, 0000032, 3000008	3000557	3001778	6	0	0	0	0	0	0	1	0.252253	157	75.9155	27	11.0196	105	64.1796	0	0	965	339.052	6	2.55686	0	0	0	0	0	0	0	0	0	0	0	0	33	33.0596	20	88.1612	1789	197.639	400	140.233	39	14.3828	193
CARD_102470_TM_#03	antibiotic inactivation enzyme; OXA-232	carbapenem, cephalosporin, penam	0000020, 0000032, 3000008	3000557	3001778	6	0	0	0	0	0	0	5	5.48649	92	185.392	20	27.4388	53	151.49	0	0	422	589.144	8	11.7865	0	0	0	0	0	0	0	0	0	0	0	0	8	32.7827	15	183.526	2961	1373.6	142	194.348	80	94.7692	37
CARD_102470_TM_#04	antibiotic inactivation enzyme; OXA-232	carbapenem, cephalosporin, penam	0000020, 0000032, 3000008	3000557	3001778	6	0	0	0	0	0	0	1	0.914416	85	147.303	21	26.5902	26	32.2053	9	9.58123	364	380.662	0	0	0	0	0	0	0	0	0	0	0	0	0	0	28	62.8593	5	69.5485	1284	474.1	125	144.232	11	10.0428	42
CARD_102470_TM_#06	antibiotic inactivation enzyme; OXA-232	carbapenem, cephalosporin, penam	0000020, 0000032, 3000008	3000557	3001778	6	0	0	0	0	0	0	3	1.04505	259	153.319	68	50.2419	67	38.8383	0	0	1007	612.202	19	10.7036	0	0	0	0	144	71.1207	0	0	0	0	0	0	161	196.738	19	103.082	6391	1025.3	281	127.079	64	23.4663	169
CARD_102470_TM_#08	antibiotic inactivation enzyme; OXA-232	carbapenem, cephalosporin, penam	0000020, 0000032, 3000008	3000557	3001778	6	0	0	0	0	0	0	54	17.9246	703	292.405	138	52.8463	221	105.649	1	0.241304	1723	557.695	9	5.56221	0	0	0	0	170	58.0253	0	0	0	0	0	0	906	874.203	192	789.084	8356	872.48	582	199.208	143	39.2338	766
NCBI_203552_TM_#10	antibiotic inactivation enzyme; OXA-256	carbapenem, cephalosporin, penam	0000020, 0000032, 3000008	3000557	3001502	6	0	0	4	31.5367	0	0	0	0	0	0	0	0	0	0	0	0	0	0	0	0	0	0	7	63.5703	0	0	0	0	0	0	0	0	0	0	0	0	11	2.73112	0	0	0	0	0
NCBI_203552_TM_#03	antibiotic inactivation enzyme; OXA-256	carbapenem, cephalosporin, penam	0000020, 0000032, 3000008	3000557	3001502	6	0	0	0	0	0	0	0	0	0	0	0	0	0	0	0	0	0	0	0	0	0	0	0	0	0	0	6	12.6631	0	0	0	0	2	2.25358	3	15.616	8	0.995798	0	0	0	0	3
NCBI_203552_TM_#07	antibiotic inactivation enzyme; OXA-256	carbapenem, cephalosporin, penam	0000020, 0000032, 3000008	3000557	3001502	6	0	0	0	0	0	0	0	0	0	0	0	0	0	0	0	0	0	0	0	0	0	0	0	0	0	0	0	0	0	0	0	0	0	0	0	0	5	0.593211	0	0	0	0	0
NCBI_203042_TM_#01	antibiotic inactivation enzyme; OXA-266	carbapenem, cephalosporin, penam	0000020, 0000032, 3000008	3000557	3001722	6	0	0	0	0	0	0	0	0	0	0	0	0	0	0	0	0	0	0	0	0	0	0	0	0	0	0	0	0	0	0	0	0	0	0	0	0	3082	87.2795	0	0	0	0	45
NCBI_203042_TM_#02	antibiotic inactivation enzyme; OXA-266	carbapenem, cephalosporin, penam	0000020, 0000032, 3000008	3000557	3001722	6	0	0	0	0	0	0	0	0	0	0	0	0	0	0	0	0	0	0	0	0	0	0	0	0	0	0	0	0	0	0	0	0	0	0	0	0	270	64.9241	0	0	0	0	2
NCBI_203042_TM_#03	antibiotic inactivation enzyme; OXA-266	carbapenem, cephalosporin, penam	0000020, 0000032, 3000008	3000557	3001722	6	0	0	0	0	0	0	0	0	0	0	0	0	0	0	0	0	0	0	0	0	0	0	0	0	0	0	0	0	0	0	0	0	0	0	0	0	1402	188.441	0	0	0	0	2
NCBI_203042_TM_#04	antibiotic inactivation enzyme; OXA-266	carbapenem, cephalosporin, penam	0000020, 0000032, 3000008	3000557	3001722	6	0	0	0	0	0	0	0	0	0	0	0	0	0	0	0	0	0	0	0	0	0	0	0	0	0	0	0	0	0	0	0	0	0	0	0	0	875	146.289	0	0	0	0	14
NCBI_203042_TM_#05	antibiotic inactivation enzyme; OXA-266	carbapenem, cephalosporin, penam	0000020, 0000032, 3000008	3000557	3001722	6	0	0	0	0	0	0	0	0	0	0	0	0	0	0	0	0	0	0	0	0	0	0	0	0	0	0	0	0	0	0	0	0	0	0	0	0	446	96.5745	0	0	0	0	1
CARD_102750_TM_#03	antibiotic inactivation enzyme; OXA-275	carbapenem, cephalosporin, penam	0000020, 0000032, 3000008	3000557	3001731	6	0	0	0	0	8	8.9102	0	0	255	130.731	0	0	0	0	15	4.5505	1	0.347595	0	0	0	0	0	0	6	5.45124	0	0	0	0	19	29.2426	0	0	0	0	0	0	1365	554.911	15	4.66093	173
CARD_102750_TM_#04	antibiotic inactivation enzyme; OXA-275	carbapenem, cephalosporin, penam	0000020, 0000032, 3000008	3000557	3001731	6	0	0	0	0	1	1.03127	0	0	272	133.478	0	0	92	42.2189	8	2.21989	9	3.54032	0	0	0	0	0	0	0	0	0	0	0	0	11	15.6758	1	0.918125	0	0	3	0.306807	1655	622.633	33	8.85572	151
CARD_102750_TM_#02	antibiotic inactivation enzyme; OXA-275	carbapenem, cephalosporin, penam	0000020, 0000032, 3000008	3000557	3001731	6	0	0	0	0	0	0	0	0	120	107.04	0	0	0	0	4	2.49348	0	0	0	0	0	0	0	0	0	0	0	0	0	0	8	24.2573	0	0	0	0	0	0	755	438.947	0	0	94
CARD_102750_TM_#05	antibiotic inactivation enzyme; OXA-275	carbapenem, cephalosporin, penam	0000020, 0000032, 3000008	3000557	3001731	6	0	0	0	0	0	0	0	0	157	160.825	6	4.38603	0	0	5	2.67158	0	0	0	0	0	0	0	0	0	0	0	0	0	0	13	35.7287	0	0	0	0	0	0	633	551.707	14	12.1267	97
CARD_102750_TM_#06	antibiotic inactivation enzyme; OXA-275	carbapenem, cephalosporin, penam	0000020, 0000032, 3000008	3000557	3001731	6	0	0	0	0	0	0	0	0	77	135.995	0	0	47	40.0825	8	5.7913	0	0	0	0	0	0	0	0	0	0	0	0	0	0	0	0	0	0	0	0	35	6.16458	543	740.373	10	3.93723	216
CARD_102750_TM_#07	antibiotic inactivation enzyme; OXA-275	carbapenem, cephalosporin, penam	0000020, 0000032, 3000008	3000557	3001731	6	0	0	0	0	0	0	0	0	65	94.9892	0	0	0	0	9	14.48	0	0	0	0	0	0	0	0	0	0	0	0	0	0	0	0	0	0	0	0	0	0	282	351.802	3	3.14509	71
CARD_102497_TM_#05	antibiotic inactivation enzyme; OXA-279	carbapenem, cephalosporin, penam	0000020, 0000032, 3000008	3000557	3001734	6	0	0	0	0	0	0	0	0	0	0	0	0	68	35.2908	0	0	0	0	0	0	0	0	0	0	0	0	0	0	0	0	0	0	0	0	0	0	1167	162.081	0	0	0	0	75
CARD_102497_TM_#08	antibiotic inactivation enzyme; OXA-279	carbapenem, cephalosporin, penam	0000020, 0000032, 3000008	3000557	3001734	6	0	0	0	0	0	0	0	0	0	0	0	0	0	0	0	0	0	0	0	0	0	0	0	0	0	0	0	0	0	0	0	0	0	0	0	0	12	4.05766	0	0	0	0	0
CARD_101845_TM_#01	antibiotic inactivation enzyme; OXA-29	carbapenem, cephalosporin, penam	0000020, 0000032, 3000008	3000557	3001424	6	0	0	0	0	0	0	0	0	0	0	0	0	0	0	0	0	0	0	0	0	0	0	0	0	0	0	0	0	0	0	0	0	0	0	0	0	0	0	2	0.0763887	0	0	0
CARD_102224_TM_#03	antibiotic inactivation enzyme; OXA-294	carbapenem, cephalosporin, penam	0000020, 0000032, 3000008	3000557	3001749	6	0	0	0	0	0	0	0	0	8	6.43535	0	0	29	26.5352	0	0	0	0	0	0	0	0	0	0	0	0	0	0	0	0	0	0	0	0	0	0	2598	611.367	0	0	0	0	171
CARD_102224_TM_#04	antibiotic inactivation enzyme; OXA-294	carbapenem, cephalosporin, penam	0000020, 0000032, 3000008	3000557	3001749	6	0	0	0	0	0	0	0	0	0	0	0	0	22	17.8149	0	0	0	0	0	0	0	0	0	0	0	0	0	0	0	0	0	0	0	0	0	0	3006	610.468	0	0	0	0	158
CARD_102224_TM_#05	antibiotic inactivation enzyme; OXA-294	carbapenem, cephalosporin, penam	0000020, 0000032, 3000008	3000557	3001749	6	0	0	0	0	0	0	0	0	0	0	0	0	77	37.1344	0	0	0	0	0	0	0	0	0	0	0	0	0	0	0	0	0	0	0	0	0	0	3729	470.85	4	1.35055	0	0	234
NCBI_202589_TM_#07	antibiotic inactivation enzyme; OXA-296	carbapenem, cephalosporin, penam	0000020, 0000032, 3000008	3000557	3001751	6	47	8.60953	0	0	1057	1196.56	9	2.53223	30047	14667.8	240	122.887	2075	1109.24	300	100.672	467	185.49	0	0	0	0	263	1217.81	40	19.7163	0	0	0	0	21	66.5868	2384	2614.47	0	0	0	0	7067	2678.84	689	233.712	57
NCBI_202589_TM_#09	antibiotic inactivation enzyme; OXA-296	carbapenem, cephalosporin, penam	0000020, 0000032, 3000008	3000557	3001751	6	5	2.2537	0	0	363	2042.56	4	1.62563	9066	17476.4	142	214.456	940	1611.96	66	93.3249	184	246.002	0	0	0	0	222	3974.97	0	0	0	0	0	0	16	41.5552	872	3107.31	0	0	0	0	5262	5624.5	307	305.238	21
NCBI_202589_TM_#10	antibiotic inactivation enzyme; OXA-296	carbapenem, cephalosporin, penam	0000020, 0000032, 3000008	3000557	3001751	6	42	20.7698	0	0	1349	1939.48	31	11.365	43312	27738	435	283.351	2987	2205.55	442	177.776	624	309.152	0	0	0	0	261	1225.1	10	5.58821	0	0	0	0	23	40.226	3027	4623.94	0	0	0	0	11077	6017.7	819	340.235	80
CARD_102249_TM_#01	antibiotic inactivation enzyme; OXA-299	carbapenem, cephalosporin, penam	0000020, 0000032, 3000008	3000557	3001754	6	0	0	0	0	0	0	0	0	0	0	0	0	18	0.906003	0	0	0	0	0	0	0	0	0	0	0	0	0	0	0	0	0	0	34	3.56505	0	0	0	0	4031	144.349	111	3.39006	256
CARD_100321_TM_#07	antibiotic inactivation enzyme; OXA-31	carbapenem, cephalosporin, penam	0000020, 0000032, 3000008	3000557	3001425	6	0	0	0	0	0	0	0	0	0	0	0	0	14	3.21612	0	0	0	0	0	0	0	0	0	0	0	0	0	0	0	0	6	5.36889	2	1.15299	0	0	0	0	0	0	0	0	0
CARD_100321_TM_#09	antibiotic inactivation enzyme; OXA-31	carbapenem, cephalosporin, penam	0000020, 0000032, 3000008	3000557	3001425	6	0	0	0	0	0	0	0	0	0	0	0	0	2	1.38746	0	0	0	0	0	0	0	0	0	0	0	0	0	0	0	0	4	9.09869	0	0	0	0	0	0	0	0	0	0	0
CARD_100321_TM_#01	antibiotic inactivation enzyme; OXA-31	carbapenem, cephalosporin, penam	0000020, 0000032, 3000008	3000557	3001425	6	0	0	0	0	0	0	0	0	0	0	0	0	0	0	0	0	0	0	0	0	0	0	0	0	0	0	0	0	0	0	1	1.42508	0	0	0	0	0	0	0	0	0	0	0
CARD_100649_TM_#01	antibiotic inactivation enzyme; OXA-347	carbapenem, cephalosporin, penam	0000020, 0000032, 3000008	3000557	3001777	6	0	0	0	0	0	0	0	0	0	0	2	0.0888631	222	11.2782	0	0	0	0	0	0	0	0	8	3.48856	0	0	0	0	0	0	815	135.597	16	1.70751	0	0	0	0	0	0	0	0	0
NCBI_202677_TM_#01	antibiotic inactivation enzyme; OXA-362	carbapenem, cephalosporin, penam	0000020, 0000032, 3000008	3000557	3001549	6	0	0	0	0	139	16.4644	465	14.4804	169	8.11044	4973	213.553	13899	686.986	302	9.52882	94	3.3647	0	0	140	48.8192	0	0	0	0	0	0	0	0	4580	755.296	1	0.107313	4330	2080.07	11897	134.963	2124	75.7713	251	7.53155	844
CARD_102048_TM_#03	antibiotic inactivation enzyme; OXA-364	carbapenem, cephalosporin, penam	0000020, 0000032, 3000008	3000557	3001551	6	0	0	0	0	0	0	0	0	7	0.575424	0	0	0	0	0	0	0	0	0	0	0	0	0	0	0	0	0	0	0	0	0	0	0	0	0	0	71	1.30802	0	0	0	0	0
CARD_102048_TM_#02	antibiotic inactivation enzyme; OXA-364	carbapenem, cephalosporin, penam	0000020, 0000032, 3000008	3000557	3001551	6	0	0	0	0	0	0	0	0	0	0	0	0	0	0	0	0	0	0	0	0	0	0	0	0	0	0	0	0	0	0	0	0	0	0	0	0	59	17.7103	0	0	0	0	0
CARD_102103_TM_#02	antibiotic inactivation enzyme; OXA-372	carbapenem, cephalosporin, penam	0000020, 0000032, 3000008	3000557	3001558	6	0	0	6	40.2029	0	0	0	0	0	0	0	0	0	0	0	0	0	0	0	0	0	0	0	0	0	0	0	0	0	0	0	0	0	0	0	0	0	0	0	0	0	0	0
CARD_102103_TM_#05	antibiotic inactivation enzyme; OXA-372	carbapenem, cephalosporin, penam	0000020, 0000032, 3000008	3000557	3001558	6	0	0	4	11.1904	0	0	0	0	0	0	0	0	0	0	0	0	0	0	0	0	0	0	0	0	0	0	0	0	0	0	0	0	0	0	0	0	0	0	0	0	0	0	0
NCBI_203857_TM_#01	antibiotic inactivation enzyme; OXA-416	carbapenem, cephalosporin, penam	0000020, 0000032, 3000008	3000557	3001607	6	448	8.41945	26	9.98708	787	96.6738	7163	228.62	5367	265.269	867	38.7542	108	5.51938	4186	137.459	21681	822.359	1540	79.2439	148	54.4936	533	234.313	1742	78.2258	16	3.25628	194	17.0726	1192	201.726	15510	1679.93	14	6.90691	1193	14.1486	1096	40.281	1144	35.8975	549
NCBI_202742_TM_#05	antibiotic inactivation enzyme; OXA-443	carbapenem, cephalosporin, penam	0000020, 0000032, 3000008	3000557	3003599	6	0	0	0	0	0	0	0	0	0	0	0	0	0	0	0	0	0	0	0	0	0	0	0	0	0	0	0	0	0	0	2	2.19869	0	0	0	0	0	0	0	0	0	0	0
NCBI_202742_TM_#06	antibiotic inactivation enzyme; OXA-443	carbapenem, cephalosporin, penam	0000020, 0000032, 3000008	3000557	3003599	6	0	0	0	0	0	0	0	0	0	0	0	0	0	0	0	0	0	0	0	0	0	0	0	0	0	0	0	0	0	0	0	0	0	0	0	0	1	0.684611	0	0	0	0	0
NCBI_202742_TM_#07	antibiotic inactivation enzyme; OXA-443	carbapenem, cephalosporin, penam	0000020, 0000032, 3000008	3000557	3003599	6	0	0	0	0	0	0	0	0	0	0	0	0	0	0	0	0	0	0	0	0	0	0	0	0	0	0	0	0	0	0	0	0	0	0	0	0	0	0	10	4.23478	0	0	0
CARD_100024_TM_#01	antibiotic inactivation enzyme; OXA-45	carbapenem, cephalosporin, penam	0000020, 0000032, 3000008	3000557	3001794	6	0	0	0	0	0	0	0	0	0	0	0	0	32	1.66985	0	0	0	0	0	0	0	0	0	0	0	0	0	0	0	0	0	0	0	0	0	0	0	0	0	0	0	0	0
CARD_101180_TM_#13	antibiotic inactivation enzyme; OXA-46	carbapenem, cephalosporin, penam	0000020, 0000032, 3000008	3000557	3001797	6	0	0	0	0	0	0	0	0	0	0	0	0	2	0.693732	0	0	0	0	0	0	0	0	0	0	0	0	0	0	0	0	0	0	33	24.0821	0	0	2	0.161085	0	0	6	1.5038	0
CARD_101180_TM_#14	antibiotic inactivation enzyme; OXA-46	carbapenem, cephalosporin, penam	0000020, 0000032, 3000008	3000557	3001797	6	0	0	0	0	0	0	0	0	0	0	0	0	8	16.216	0	0	0	0	0	0	0	0	0	0	0	0	0	0	0	0	0	0	8	22.9363	0	0	0	0	0	0	0	0	0
RESF_300386_TM_#01	antibiotic inactivation enzyme; OXA-464	carbapenem, cephalosporin, penam	0000020, 0000032, 3000008	3000557	3003620	6	0	0	0	0	0	0	0	0	0	0	0	0	28	3.55747	0	0	0	0	0	0	0	0	0	0	0	0	0	0	0	0	0	0	0	0	0	0	2139	67.2468	0	0	0	0	0
RESF_300386_TM_#03	antibiotic inactivation enzyme; OXA-464	carbapenem, cephalosporin, penam	0000020, 0000032, 3000008	3000557	3003620	6	0	0	0	0	0	0	0	0	0	0	0	0	17	4.47228	0	0	0	0	0	0	0	0	0	0	0	0	0	0	0	0	0	0	0	0	0	0	2222	146.851	0	0	0	0	0
RESF_300386_TM_#02	antibiotic inactivation enzyme; OXA-464	carbapenem, cephalosporin, penam	0000020, 0000032, 3000008	3000557	3003620	6	0	0	0	0	0	0	0	0	0	0	0	0	0	0	0	0	0	0	0	0	0	0	0	0	0	0	0	0	0	0	0	0	0	0	0	0	409	133.622	0	0	0	0	0
CARD_100854_TM_#02	antibiotic inactivation enzyme; OXA-5	carbapenem, cephalosporin, penam	0000020, 0000032, 3000008	3000557	3001400	6	0	0	0	0	0	0	0	0	0	0	0	0	16	19.6557	0	0	0	0	0	0	0	0	0	0	0	0	0	0	0	0	0	0	0	0	0	0	0	0	0	0	0	0	0
CARD_100854_TM_#07	antibiotic inactivation enzyme; OXA-5	carbapenem, cephalosporin, penam	0000020, 0000032, 3000008	3000557	3001400	6	0	0	0	0	0	0	0	0	0	0	0	0	4	3.14492	0	0	0	0	0	0	0	0	0	0	0	0	0	0	0	0	0	0	0	0	0	0	0	0	0	0	0	0	0
CARD_100854_TM_#08	antibiotic inactivation enzyme; OXA-5	carbapenem, cephalosporin, penam	0000020, 0000032, 3000008	3000557	3001400	6	0	0	0	0	0	0	0	0	0	0	0	0	19	25.3836	0	0	0	0	0	0	0	0	0	0	0	0	0	0	0	0	0	0	2	3.81375	0	0	0	0	1	0.649304	0	0	0
CARD_100854_TM_#03	antibiotic inactivation enzyme; OXA-5	carbapenem, cephalosporin, penam	0000020, 0000032, 3000008	3000557	3001400	6	0	0	0	0	0	0	0	0	0	0	0	0	0	0	0	0	0	0	0	0	0	0	0	0	0	0	0	0	0	0	0	0	0	0	0	0	0	0	4	4.22047	0	0	0
CARD_100854_TM_#04	antibiotic inactivation enzyme; OXA-5	carbapenem, cephalosporin, penam	0000020, 0000032, 3000008	3000557	3001400	6	0	0	0	0	0	0	0	0	0	0	0	0	0	0	0	0	0	0	0	0	0	0	0	0	0	0	0	0	0	0	0	0	0	0	0	0	0	0	1	0.281365	0	0	0
NCBI_205780_TM_#03	antibiotic inactivation enzyme; OXA-50	ampicillin, cefalotin, carbapenem, cephalosporin, penam	3000637, 3000704, 0000020, 0000032, 3000008	3000557	3001796	6	0	0	0	0	0	0	0	0	0	0	0	0	0	0	0	0	0	0	0	0	0	0	0	0	0	0	0	0	0	0	0	0	0	0	0	0	2030	244.722	0	0	0	0	0
NCBI_205780_TM_#04	antibiotic inactivation enzyme; OXA-50	ampicillin, cefalotin, carbapenem, cephalosporin, penam	3000637, 3000704, 0000020, 0000032, 3000008	3000557	3001796	6	0	0	0	0	0	0	0	0	0	0	0	0	0	0	0	0	0	0	0	0	0	0	0	0	0	0	0	0	0	0	0	0	0	0	0	0	663	145.67	0	0	0	0	0
NCBI_205780_TM_#05	antibiotic inactivation enzyme; OXA-50	ampicillin, cefalotin, carbapenem, cephalosporin, penam	3000637, 3000704, 0000020, 0000032, 3000008	3000557	3001796	6	0	0	0	0	0	0	0	0	0	0	0	0	0	0	0	0	0	0	0	0	0	0	0	0	0	0	0	0	0	0	0	0	0	0	0	0	991	125.134	0	0	0	0	0
NCBI_205780_TM_#06	antibiotic inactivation enzyme; OXA-50	ampicillin, cefalotin, carbapenem, cephalosporin, penam	3000637, 3000704, 0000020, 0000032, 3000008	3000557	3001796	6	0	0	0	0	0	0	0	0	0	0	0	0	0	0	0	0	0	0	0	0	0	0	0	0	0	0	0	0	0	0	0	0	0	0	0	0	1346	159.4	0	0	0	0	0
NCBI_205780_TM_#08	antibiotic inactivation enzyme; OXA-50	ampicillin, cefalotin, carbapenem, cephalosporin, penam	3000637, 3000704, 0000020, 0000032, 3000008	3000557	3001796	6	0	0	0	0	0	0	0	0	0	0	0	0	0	0	0	0	0	0	0	0	0	0	0	0	0	0	0	0	0	0	0	0	0	0	0	0	1761	173.341	0	0	0	0	0
NCBI_205780_TM_#09	antibiotic inactivation enzyme; OXA-50	ampicillin, cefalotin, carbapenem, cephalosporin, penam	3000637, 3000704, 0000020, 0000032, 3000008	3000557	3001796	6	0	0	0	0	0	0	0	0	0	0	0	0	0	0	0	0	0	0	0	0	0	0	0	0	0	0	0	0	0	0	0	0	0	0	0	0	3556	182.492	0	0	0	0	0
NCBI_205811_TM_#01	antibiotic inactivation enzyme; OXA-55	carbapenem, cephalosporin, penam	0000020, 0000032, 3000008	3000557	3001813	6	0	0	0	0	0	0	0	0	0	0	0	0	0	0	0	0	0	0	0	0	0	0	0	0	0	0	0	0	0	0	0	0	0	0	0	0	6	0.881923	0	0	0	0	3
NCBI_205811_TM_#02	antibiotic inactivation enzyme; OXA-55	carbapenem, cephalosporin, penam	0000020, 0000032, 3000008	3000557	3001813	6	0	0	0	0	0	0	0	0	0	0	0	0	0	0	0	0	0	0	0	0	0	0	0	0	0	0	0	0	0	0	0	0	0	0	0	0	18	2.25676	0	0	0	0	3
NCBI_205811_TM_#03	antibiotic inactivation enzyme; OXA-55	carbapenem, cephalosporin, penam	0000020, 0000032, 3000008	3000557	3001813	6	0	0	0	0	0	0	0	0	0	0	0	0	0	0	0	0	0	0	0	0	0	0	0	0	0	0	0	0	0	0	0	0	0	0	0	0	3	1.20948	0	0	0	0	2
NCBI_205811_TM_#04	antibiotic inactivation enzyme; OXA-55	carbapenem, cephalosporin, penam	0000020, 0000032, 3000008	3000557	3001813	6	0	0	0	0	0	0	0	0	0	0	0	0	0	0	0	0	0	0	0	0	0	0	0	0	0	0	0	0	0	0	0	0	0	0	0	0	35	6.0817	0	0	0	0	2
NCBI_205811_TM_#05	antibiotic inactivation enzyme; OXA-55	carbapenem, cephalosporin, penam	0000020, 0000032, 3000008	3000557	3001813	6	0	0	0	0	0	0	0	0	0	0	0	0	0	0	0	0	0	0	0	0	0	0	0	0	0	0	0	0	0	0	0	0	0	0	0	0	15	1.86904	0	0	0	0	0
NCBI_205811_TM_#09	antibiotic inactivation enzyme; OXA-55	carbapenem, cephalosporin, penam	0000020, 0000032, 3000008	3000557	3001813	6	0	0	0	0	0	0	0	0	0	0	0	0	0	0	0	0	0	0	0	0	0	0	0	0	0	0	0	0	0	0	0	0	0	0	0	0	8	0.952503	0	0	0	0	0
NCBI_205811_TM_#10	antibiotic inactivation enzyme; OXA-55	carbapenem, cephalosporin, penam	0000020, 0000032, 3000008	3000557	3001813	6	0	0	0	0	0	0	0	0	0	0	0	0	0	0	0	0	0	0	0	0	0	0	0	0	0	0	0	0	0	0	0	0	0	0	0	0	4	0.378815	0	0	0	0	0
CARD_102699_TM_#03	antibiotic inactivation enzyme; OXA-60	carbapenem, cephalosporin, penam	0000020, 0000032, 3000008	3000557	3001808	6	0	0	0	0	0	0	0	0	0	0	0	0	0	0	0	0	0	0	0	0	0	0	0	0	6	2.36424	0	0	5	3.87104	0	0	0	0	0	0	0	0	0	0	0	0	0
CARD_102699_TM_#05	antibiotic inactivation enzyme; OXA-60	carbapenem, cephalosporin, penam	0000020, 0000032, 3000008	3000557	3001808	6	0	0	0	0	0	0	0	0	0	0	0	0	0	0	0	0	0	0	0	0	0	0	0	0	41	19.1074	0	0	0	0	0	0	0	0	0	0	0	0	0	0	0	0	0
CARD_102699_TM_#08	antibiotic inactivation enzyme; OXA-60	carbapenem, cephalosporin, penam	0000020, 0000032, 3000008	3000557	3001808	6	0	0	0	0	0	0	0	0	0	0	0	0	0	0	0	0	0	0	0	0	0	0	0	0	6	2.36424	0	0	0	0	0	0	0	0	0	0	0	0	0	0	0	0	0
CARD_102699_TM_#10	antibiotic inactivation enzyme; OXA-60	carbapenem, cephalosporin, penam	0000020, 0000032, 3000008	3000557	3001808	6	0	0	0	0	0	0	0	0	0	0	0	0	0	0	0	0	0	0	0	0	0	0	0	0	18	5.88545	0	0	0	0	0	0	0	0	0	0	0	0	0	0	0	0	0
CARD_102699_TM_#09	antibiotic inactivation enzyme; OXA-60	carbapenem, cephalosporin, penam	0000020, 0000032, 3000008	3000557	3001808	6	0	0	0	0	0	0	0	0	0	0	0	0	0	0	0	0	0	0	0	0	0	0	0	0	0	0	0	0	0	0	0	0	0	0	0	0	20	2.19076	0	0	0	0	0
NCBI_202547_TM_#01	antibiotic inactivation enzyme; OXA-61	carbapenem, cephalosporin, penam	0000020, 0000032, 3000008	3000557	3001773	6	0	0	0	0	0	0	0	0	0	0	0	0	0	0	0	0	0	0	0	0	0	0	97	46.5899	0	0	0	0	0	0	0	0	2	0.24423	0	0	0	0	0	0	0	0	0
CARD_102485_TM_#01	antibiotic inactivation enzyme; OXA-664	carbapenem, cephalosporin, penam	0000020, 0000032, 3000008	3000557	3004479	6	0	0	0	0	0	0	0	0	0	0	0	0	7664	475.985	0	0	2	0.0921188	0	0	0	0	0	0	0	0	0	0	0	0	0	0	0	0	0	0	5705	82.637	8	0.358421	15	0.581978	3
CARD_102486_TM_#01	antibiotic inactivation enzyme; OXA-665	carbapenem, cephalosporin, penam	0000020, 0000032, 3000008	3000557	3004478	6	0	0	0	0	0	0	0	0	0	0	0	0	16	0.79382	0	0	0	0	0	0	0	0	0	0	0	0	0	0	0	0	0	0	0	0	0	0	0	0	0	0	0	0	4
NCBI_203673_TM_#01	antibiotic inactivation enzyme; OXA-724	carbapenem, cephalosporin, penam	0000020, 0000032, 3000008	3000557	3004837	6	4	0.073075	0	0	0	0	99	3.10624	84	4.05502	12	0.530851	447	22.6572	0	0	61	2.28532	110	5.60951	0	0	52	22.2067	29	1.30871	0	0	0	0	6	1.01379	821	87.1659	0	0	766	9.09366	254	9.29109	10	0.305427	116
NCBI_206195_TM_#01	antibiotic inactivation enzyme; OXA-85	carbapenem, cephalosporin, penam	0000020, 0000032, 3000008	3000557	3001780	6	0	0	0	0	0	0	0	0	0	0	0	0	0	0	0	0	0	0	0	0	0	0	0	0	0	0	0	0	0	0	0	0	4	0.448001	0	0	0	0	0	0	0	0	0
ARGA_400947_TM_#01	antibiotic inactivation enzyme; OXA-9	carbapenem, cephalosporin, penam	0000020, 0000032, 3000008	3000557	3001404	6	0	0	0	0	0	0	0	0	0	0	0	0	0	0	0	0	0	0	0	0	0	0	0	0	0	0	0	0	0	0	0	0	0	0	0	0	0	0	4	0.151407	0	0	0
CARD_102919_TM_#01	antibiotic inactivation enzyme; OXA-926	carbapenem, cephalosporin, penam	0000020, 0000032, 3000008	3000557	3005323	6	0	0	0	0	0	0	0	0	0	0	0	0	4	0.211463	0	0	0	0	0	0	0	0	0	0	0	0	0	0	0	0	0	0	0	0	0	0	2	0.02456	0	0	0	0	0
CARD_100035_TM_#06	antibiotic inactivation enzyme; OXY-6-3	monobactam, cephalosporin, penam	0000004, 0000032, 3000008	3000557	3002415	6	0	0	0	0	0	0	2	0.585226	54	25.3127	440	204.371	565	302.177	0	0	27	12.2779	0	0	8	26.9129	0	0	0	0	0	0	3	2.40927	4	6.15633	4	3.9663	190	997.19	194	27.127	1	0.342201	0	0	1376
CARD_100035_TM_#10	antibiotic inactivation enzyme; OXY-6-3	monobactam, cephalosporin, penam	0000004, 0000032, 3000008	3000557	3002415	6	0	0	0	0	0	0	7	2.67067	117	63.2559	590	360.815	696	462.245	0	0	23	9.52415	0	0	0	0	0	0	0	0	0	0	1	0.956059	0	0	0	0	141	883.648	307	42.579	0	0	0	0	1606
CARD_102742_TM_#01	antibiotic inactivation enzyme; PAC-1	cephalosporin	32	3000557	3005150	6	0	0	0	0	0	0	0	0	0	0	0	0	0	0	0	0	0	0	12	0.545027	0	0	0	0	0	0	0	0	0	0	0	0	0	0	0	0	0	0	0	0	0	0	0
NCBI_203837_TM_#03	antibiotic inactivation enzyme; PDC beta-lactamase	monobactam, carbapenem, cephalosporin	0000004, 0000020, 0000032	3000557	3000098	5	6	0.154085	0	0	0	0	0	0	0	0	0	0	0	0	0	0	8	0.409138	0	0	0	0	0	0	0	0	2	0.610939	0	0	0	0	0	0	0	0	8556	149.971	0	0	0	0	20
NCBI_203837_TM_#01	antibiotic inactivation enzyme; PDC beta-lactamase	monobactam, carbapenem, cephalosporin	0000004, 0000020, 0000032	3000557	3000098	5	0	0	0	0	0	0	0	0	0	0	0	0	0	0	0	0	0	0	0	0	0	0	0	0	0	0	0	0	0	0	0	0	0	0	1	3.45251	2207	165.774	0	0	0	0	0
NCBI_203837_TM_#02	antibiotic inactivation enzyme; PDC beta-lactamase	monobactam, carbapenem, cephalosporin	0000004, 0000020, 0000032	3000557	3000098	5	0	0	0	0	0	0	0	0	0	0	0	0	0	0	0	0	0	0	0	0	0	0	0	0	0	0	0	0	0	0	0	0	0	0	0	0	1335	171.005	0	0	0	0	0
CARD_101996_TM_#01	antibiotic inactivation enzyme; PEDO-1	carbapenem	20	3000557	3003670	7	0	0	0	0	29	3.27542	0	0	0	0	0	0	0	0	0	0	0	0	0	0	0	0	0	0	0	0	0	0	0	0	0	0	0	0	0	0	0	0	0	0	0	0	0
CARD_101997_TM_#01	antibiotic inactivation enzyme; PEDO-2	carbapenem	20	3000557	3003714	7	0	0	0	0	8	0.927985	0	0	0	0	0	0	0	0	0	0	0	0	0	0	0	0	0	0	0	0	0	0	0	0	0	0	0	0	0	0	0	0	184	6.36819	3	0.0842597	0
CARD_101998_TM_#01	antibiotic inactivation enzyme; PEDO-3	carbapenem	20	3000557	3003715	7	0	0	0	0	0	0	0	0	0	0	0	0	0	0	0	0	0	0	0	0	0	0	0	0	2	0.103485	0	0	0	0	0	0	0	0	0	0	0	0	35	1.50471	6	0.225179	0
NCBI_202754_TM_#07	antibiotic inactivation enzyme; PER-4	monobactam, carbapenem, cephalosporin, penam	0000004, 0000020, 0000032, 3000008, 3003706	3000557	3002366	6	8	1.20261	0	0	0	0	0	0	11	3.87126	9	2.8817	0	0	0	0	187	56.2713	0	0	0	0	0	0	0	0	0	0	0	0	492	626.059	253	230.052	6	21.3624	736	72.8301	185	62.4762	2120	547.659	1
NCBI_202754_TM_#11	antibiotic inactivation enzyme; PER-4	monobactam, carbapenem, cephalosporin, penam	0000004, 0000020, 0000032, 3000008, 3003706	3000557	3002366	6	7	1.04818	0	0	0	0	0	0	11	3.99614	4	2.01326	6	3.00419	0	0	447	144.373	0	0	0	0	0	0	0	0	0	0	0	0	283	375.937	378	351.859	14	53.5974	973	103.835	363	118.25	3035	873.707	3
NCBI_202754_TM_#04	antibiotic inactivation enzyme; PER-4	monobactam, carbapenem, cephalosporin, penam	0000004, 0000020, 0000032, 3000008, 3003706	3000557	3002366	6	0	0	0	0	0	0	0	0	6	2.70893	0	0	17	9.18749	0	0	21	8.64208	0	0	0	0	0	0	0	0	0	0	0	0	0	0	22	24.9499	0	0	14	1.57322	7	3.36032	110	38.0057	0
NCBI_202754_TM_#02	antibiotic inactivation enzyme; PER-4	monobactam, carbapenem, cephalosporin, penam	0000004, 0000020, 0000032, 3000008, 3003706	3000557	3002366	6	0	0	0	0	0	0	0	0	0	0	0	0	94	37.3681	0	0	161	50.3767	0	0	0	0	0	0	0	0	0	0	0	0	125	160.515	202	191.91	8	35.0461	947	97.3282	47	14.915	1405	407.083	10
CARD_102602_TM_#01	antibiotic inactivation enzyme; PNGM-1	carbapenem, cephalosporin, penam	0000020, 0000032, 3000008	3000557	3004571	7	0	0	149	50.1448	33	3.4865	0	0	0	0	0	0	0	0	0	0	0	0	0	0	0	0	0	0	0	0	87	15.6931	72	5.63579	0	0	0	0	0	0	0	0	0	0	0	0	0
CARD_101373_TM_#01	antibiotic inactivation enzyme; Pseudomonas aeruginosa catB6	azidamfenicol, chloramphenicol, thiamphenicol, phenicol antibiotic	3000382, 3000385, 3000456, 3000387	3000557	3002678	4	5	0.130649	63	32.9831	21	3.51179	1	0.0443353	23	1.54778	0	0	412	28.6315	0	0	0	0	0	0	244	122.477	19	11.5008	9	0.543177	279	77.6119	29	3.49589	85	19.412	121	17.655	0	0	911	14.8021	1	0.0511573	3	0.131241	205
CARD_102413_TM_#01	antibiotic inactivation enzyme; Pseudomonas aeruginosa catB7	azidamfenicol, chloramphenicol, thiamphenicol, phenicol antibiotic	3000382, 3000385, 3000456, 3000387	3000557	3002679	4	0	0	0	0	32	4.93099	0	0	0	0	0	0	5	0.339543	0	0	0	0	0	0	0	0	37	22.1315	0	0	0	0	0	0	0	0	0	0	0	0	8108	130.55	0	0	0	0	0
CARD_100916_TM_#01	antibiotic inactivation enzyme; RCP-1	penam	3000008	3000557	3003563	6	0	0	80	27.9742	431	48.2985	3	0.088098	0	0	6	0.231133	87	4.10508	0	0	0	0	8	0.369266	0	0	0	0	0	0	0	0	0	0	0	0	0	0	3	1.3776	11	0.119862	0	0	0	0	47
CARD_102343_TM_#01	antibiotic inactivation enzyme; Rhodobacter sphaeroides ampC beta-lactamase	benzylpenicillin, cephalosporin, penam	3000632, 0000032, 3000008	3000557	3004291	6	0	0	0	0	0	0	0	0	0	0	0	0	146	6.65414	0	0	0	0	0	0	0	0	0	0	0	0	0	0	0	0	0	0	0	0	3	1.34039	116	1.23428	0	0	0	0	20
RESF_302843_TM_#03	antibiotic inactivation enzyme; rifampin ADP-ribosyltransferase (Arr)	rifampin, rifaximin, rifabutin, rifapentine, rifamycin antibiotic	3000169, 3000517, 3000530, 3000534, 3000157	3000557	3000390	4	0	0	0	0	0	0	0	0	0	0	0	0	0	0	0	0	0	0	0	0	0	0	0	0	0	0	0	0	0	0	0	0	0	0	0	0	3	1.6551	0	0	0	0	0
RESF_302843_TM_#05	antibiotic inactivation enzyme; rifampin ADP-ribosyltransferase (Arr)	rifampin, rifaximin, rifabutin, rifapentine, rifamycin antibiotic	3000169, 3000517, 3000530, 3000534, 3000157	3000557	3000390	4	0	0	0	0	0	0	0	0	0	0	0	0	0	0	0	0	0	0	0	0	0	0	0	0	0	0	0	0	0	0	0	0	0	0	0	0	6	0.880215	0	0	0	0	0
CARD_102079_TM_#01	antibiotic inactivation enzyme; Rm3	carbapenem, cephalosporin, penam	0000020, 0000032, 3000008	3000557	3003894	7	18034	299.992	0	0	34901	3775.81	777	22.005	46059	2016.63	26879	1064.34	0	0	378	11.0173	14245	479.818	0	0	6	1.97846	236	90.802	15762	624.069	0	0	236	18.2308	136	20.3483	83663	8037.23	0	0	0	0	168385	5504.04	59775	1673.59	19
CARD_100910_TM_#01	antibiotic inactivation enzyme; rphA	rifampin, rifaximin, rifabutin, rifapentine, rifamycin antibiotic	3000169, 3000517, 3000530, 3000534, 3000157	3000557	3000444	5	6	0.0953387	0	0	0	0	10	0.284812	22	0.954106	0	0	8	0.353329	0	0	0	0	25	1.08547	0	0	0	0	0	0	0	0	0	0	0	0	0	0	0	0	0	0	20	0.653305	0	0	0
CARD_102166_TM_#01	antibiotic inactivation enzyme; rphB	rifampin, rifaximin, rifabutin, rifapentine, rifamycin antibiotic	3000169, 3000517, 3000530, 3000534, 3000157	3000557	3003992	5	8	0.134483	1	0.340102	207	22.4749	28	0.777673	324	14.1544	57	2.24005	244	11.1228	25	0.72595	158	5.29824	1509	68.3441	0	0	0	0	326	12.9591	0	0	0	0	1425	213.358	47	4.51346	637	280.362	59	0.622049	419	13.5916	139	3.88659	604
NCBI_202224_TM_#04	antibiotic inactivation enzyme; SAT-2	streptothricin, nucleoside antibiotic	0000012, 3000034	3000557	3002895	4	0	0	5	10.0844	25	16.1836	857	135.986	0	0	62	14.3949	0	0	0	0	0	0	0	0	249	466.545	221	484.329	108	24.6545	0	0	0	0	1224	1064.54	4	2.23866	0	0	16	0.980392	6	1.1763	0	0	24
NCBI_202224_TM_#02	antibiotic inactivation enzyme; SAT-2	streptothricin, nucleoside antibiotic	0000012, 3000034	3000557	3002895	4	0	0	0	0	0	0	10	0.515164	0	0	109	8.62568	707	64.6271	0	0	0	0	0	0	0	0	0	0	0	0	0	0	0	0	38	11.5187	2	0.39663	0	0	70	1.5102	0	0	0	0	10
CARD_101521_TM_#01	antibiotic inactivation enzyme; SAT-4	streptothricin, nucleoside antibiotic	0000012, 3000034	3000557	3002897	4	2	0.574857	0	0	2543	14136.7	18	22.4941	0	0	414	561.746	0	0	0	0	0	0	0	0	0	0	0	0	71	62.0707	0	0	0	0	4	41.0422	9	22.9034	0	0	3	2.73845	0	0	0	0	0
CARD_101521_TM_#03	antibiotic inactivation enzyme; SAT-4	streptothricin, nucleoside antibiotic	0000012, 3000034	3000557	3002897	4	18	5.02404	0	0	3962	11826.3	5	3.79888	0	0	520	510.069	0	0	0	0	0	0	0	0	0	0	0	0	2	1.70751	0	0	0	0	10	27.6471	2	3.09867	0	0	0	0	0	0	0	0	0
CARD_101521_TM_#04	antibiotic inactivation enzyme; SAT-4	streptothricin, nucleoside antibiotic	0000012, 3000034	3000557	3002897	4	30	9.23877	0	0	5491	11744.5	5	4.03768	0	0	426	392.707	0	0	0	0	0	0	0	0	0	0	0	0	14	10.245	0	0	0	0	7	19.2385	5	10.4408	0	0	0	0	0	0	0	0	0
CARD_102663_TM_#01	antibiotic inactivation enzyme; SatA	nucleoside antibiotic	3000034	3000557	3005045	4	0	0	0	0	0	0	0	0	4	0.317447	0	0	0	0	0	0	0	0	0	0	0	0	0	0	0	0	0	0	0	0	0	0	0	0	0	0	0	0	0	0	0	0	43
CARD_102522_TM_#01	antibiotic inactivation enzyme; SCO-1	penicillin, cefepime, ceftazidime, cefuroxime, amoxicillin, piperacillin, cefotaxime, cefalotin, ticarcillin, amoxicillin-clavulanic acid, piperacillin-tazobactam, ticarcillin-clavulanic acid, penam	0000054, 0000059, 0000060, 0000063, 0000064, 0000078, 3000645, 3000704, 3003832, 3003997, 3004021, 3004023, 3000008	3000557	3004856	6	0	0	0	0	0	0	0	0	0	0	0	0	0	0	0	0	0	0	0	0	29	9.94331	0	0	0	0	5	0.955378	0	0	0	0	0	0	0	0	0	0	0	0	0	0	0
CARD_101217_TM_#08	antibiotic inactivation enzyme; Sed-1	cephalosporin, penam	0000032, 3000008	3000557	3003561	6	0	0	0	0	0	0	9	2.08376	165	60.3831	1082	387.144	1440	600.959	0	0	50	13.9884	0	0	0	0	0	0	0	0	0	0	2	1.2168	1	1.16597	0	0	279	1072.42	52051	4873.65	7	1.84166	0	0	2580
CARD_101217_TM_#01	antibiotic inactivation enzyme; Sed-1	cephalosporin, penam	0000032, 3000008	3000557	3003561	6	0	0	0	0	0	0	0	0	12	5.22872	11	5.70746	74	40.2064	0	0	0	0	0	0	0	0	0	0	0	0	0	0	0	0	9	13.3836	0	0	2	27.3439	35979	4192.68	13	4.69927	0	0	35
CARD_101217_TM_#05	antibiotic inactivation enzyme; Sed-1	cephalosporin, penam	0000032, 3000008	3000557	3003561	6	0	0	0	0	0	0	0	0	7	3.08439	10	3.7904	74	37.337	0	0	0	0	0	0	0	0	0	0	0	0	0	0	0	0	0	0	0	0	4	23.5723	27955	3289.33	12	6.26428	0	0	40
CARD_101217_TM_#09	antibiotic inactivation enzyme; Sed-1	cephalosporin, penam	0000032, 3000008	3000557	3003561	6	0	0	0	0	0	0	0	0	5	2.7943	32	19.745	448	301.538	0	0	0	0	1	0.561427	0	0	0	0	0	0	0	0	0	0	0	0	0	0	113	654.12	34074	5721.7	30	17.4183	0	0	14
CARD_101217_TM_#04	antibiotic inactivation enzyme; Sed-1	cephalosporin, penam	0000032, 3000008	3000557	3003561	6	0	0	0	0	0	0	0	0	0	0	0	0	56	22.8917	0	0	0	0	0	0	0	0	0	0	0	0	0	0	0	0	0	0	0	0	0	0	27327	2561.91	2	0.511573	0	0	1
CARD_101217_TM_#06	antibiotic inactivation enzyme; Sed-1	cephalosporin, penam	0000032, 3000008	3000557	3003561	6	0	0	0	0	0	0	0	0	0	0	0	0	0	0	0	0	0	0	0	0	0	0	0	0	0	0	0	0	0	0	0	0	0	0	0	0	11156	4480.98	1	1.40682	0	0	0
CARD_100575_TM_#01	antibiotic inactivation enzyme; SFB-1	cephalosporin, penam	0000032, 3000008	3000557	3003557	7	2	0.0433309	106825	46046.8	8	1.11937	0	0	0	0	0	0	0	0	0	0	0	0	0	0	0	0	638	315.485	0	0	693	159.636	195	19.3819	291	55.3384	0	0	0	0	0	0	0	0	0	0	97
ARGA_400261_TM_#01	antibiotic inactivation enzyme; SFH-1	carbapenem	20	3000557	3000849	7	0	0	0	0	0	0	0	0	0	0	0	0	0	0	0	0	6	0.246716	0	0	0	0	0	0	0	0	0	0	0	0	0	0	0	0	0	0	0	0	0	0	0	0	0
NCBI_203958_TM_#04	antibiotic inactivation enzyme; SHV beta-lactamase	carbapenem, cephalosporin, penam	0000020, 0000032, 3000008	3000557	3000015	6	0	0	0	0	0	0	0	0	112	24.642	0	0	16	3.89733	0	0	6	1.06373	0	0	0	0	0	0	0	0	0	0	0	0	0	0	0	0	2	4.09339	8585	463.387	0	0	0	0	635
NCBI_203958_TM_#01	antibiotic inactivation enzyme; SHV beta-lactamase	carbapenem, cephalosporin, penam	0000020, 0000032, 3000008	3000557	3000015	6	0	0	0	0	0	0	0	0	0	0	0	0	3	1.47418	0	0	0	0	0	0	0	0	0	0	0	0	0	0	0	0	0	0	0	0	0	0	1539	214.397	0	0	0	0	15
NCBI_203958_TM_#03	antibiotic inactivation enzyme; SHV beta-lactamase	carbapenem, cephalosporin, penam	0000020, 0000032, 3000008	3000557	3000015	6	0	0	0	0	0	0	0	0	0	0	0	0	8	6.30771	0	0	0	0	0	0	0	0	0	0	0	0	0	0	0	0	0	0	0	0	0	0	1901	447.148	0	0	0	0	3
NCBI_203958_TM_#02	antibiotic inactivation enzyme; SHV beta-lactamase	carbapenem, cephalosporin, penam	0000020, 0000032, 3000008	3000557	3000015	6	0	0	0	0	0	0	0	0	0	0	0	0	0	0	0	0	0	0	0	0	0	0	0	0	0	0	0	0	0	0	0	0	0	0	0	0	2029	282.319	0	0	0	0	9
NCBI_203958_TM_#05	antibiotic inactivation enzyme; SHV beta-lactamase	carbapenem, cephalosporin, penam	0000020, 0000032, 3000008	3000557	3000015	6	0	0	0	0	0	0	0	0	0	0	0	0	0	0	0	0	0	0	0	0	0	0	0	0	0	0	0	0	0	0	0	0	0	0	0	0	1385	391.172	0	0	0	0	43
CARD_100391_TM_#01	antibiotic inactivation enzyme; SLB-1	cephalosporin, penam	0000032, 3000008	3000557	3003556	7	0	0	25	9.80294	0	0	0	0	0	0	0	0	0	0	0	0	0	0	0	0	0	0	0	0	0	0	0	0	0	0	0	0	0	0	0	0	0	0	0	0	0	0	0
CARD_102041_TM_#01	antibiotic inactivation enzyme; SPM-1	carbapenem	20	3000557	3003793	7	0	0	0	0	0	0	0	0	0	0	0	0	4	0.200386	0	0	0	0	0	0	0	0	0	0	0	0	0	0	0	0	0	0	0	0	0	0	0	0	0	0	0	0	0
CARD_101771_TM_#06	antibiotic inactivation enzyme; SRT-1	cephalosporin	32	3000557	3002493	6	0	0	0	0	31	29.7654	0	0	11	3.99614	22	7.27724	7	2.66304	0	0	33	9.90028	16	7.55301	0	0	0	0	0	0	0	0	431	329.877	0	0	1	0.799657	2	7.3505	228	21.0127	5	1.74028	31	7.29007	12
CARD_101771_TM_#12	antibiotic inactivation enzyme; SRT-1	cephalosporin	32	3000557	3002493	6	0	0	0	0	10	9.60151	0	0	0	0	2	0.777271	0	0	0	0	2	0.789988	0	0	0	0	0	0	0	0	0	0	0	0	0	0	0	0	25	106.705	363	36.8291	2	0.582134	0	0	0
CARD_101771_TM_#15	antibiotic inactivation enzyme; SRT-1	cephalosporin	32	3000557	3002493	6	0	0	0	0	0	0	0	0	7	4.37961	7	3.97992	2	1.31038	0	0	0	0	0	0	0	0	0	0	0	0	0	0	2	2.2308	0	0	0	0	9	57.4441	160	30.849	0	0	0	0	0
CARD_101771_TM_#07	antibiotic inactivation enzyme; SRT-1	cephalosporin	32	3000557	3002493	6	0	0	0	0	0	0	0	0	0	0	1	0.444959	8	4.10207	0	0	0	0	0	0	0	0	0	0	0	0	0	0	0	0	0	0	0	0	13	64.3968	213	29.7354	0	0	0	0	0
CARD_101771_TM_#14	antibiotic inactivation enzyme; SRT-1	cephalosporin	32	3000557	3002493	6	0	0	0	0	0	0	0	0	0	0	3	2.04681	0	0	0	0	0	0	0	0	0	0	0	0	0	0	0	0	0	0	0	0	0	0	26	234.105	172	34.6469	0	0	0	0	0
CARD_101771_TM_#02	antibiotic inactivation enzyme; SRT-1	cephalosporin	32	3000557	3002493	6	0	0	0	0	0	0	0	0	0	0	0	0	4	3.93115	0	0	0	0	0	0	0	0	0	0	0	0	0	0	0	0	0	0	0	0	12	85.4496	122	23.0619	0	0	0	0	4
CARD_101771_TM_#04	antibiotic inactivation enzyme; SRT-1	cephalosporin	32	3000557	3002493	6	0	0	0	0	0	0	0	0	0	0	0	0	0	0	0	0	0	0	0	0	0	0	0	0	0	0	0	0	0	0	0	0	0	0	14	80.1242	186	30.5631	1	0.383679	0	0	4
CARD_100926_TM_#07	antibiotic inactivation enzyme; TEM beta-lactamase	ampicillin, monobactam, cephalosporin, penam, penem	3000637, 0000004, 0000032, 3000008, 3003706	3000557	3000014	5	13	1.97491	0	0	0	0	13	4.23373	99	42.606	108	39.1243	306	141.916	0	0	0	0	14	5.51253	0	0	102	388.411	243	84.0422	128	198.219	1	0.647653	35	44.9668	0	0	0	0	326	32.7918	6	1.63373	0	0	17
CARD_100926_TM_#01	antibiotic inactivation enzyme; TEM beta-lactamase	ampicillin, monobactam, cephalosporin, penam, penem	3000637, 0000004, 0000032, 3000008, 3003706	3000557	3000014	5	0	0	7	18.9713	37	35.8259	0	0	0	0	0	0	208	99.6839	0	0	0	0	0	0	0	0	0	0	0	0	0	0	0	0	59	81.8641	0	0	0	0	264	26.6931	0	0	28	6.32072	12
CARD_100926_TM_#05	antibiotic inactivation enzyme; TEM beta-lactamase	ampicillin, monobactam, cephalosporin, penam, penem	3000637, 0000004, 0000032, 3000008, 3003706	3000557	3000014	5	0	0	1	2.62806	0	0	0	0	0	0	0	0	269	107.833	0	0	0	0	0	0	0	0	0	0	25	8.84016	0	0	0	0	52	63.464	0	0	0	0	368	34.7707	0	0	0	0	44
CARD_100926_TM_#03	antibiotic inactivation enzyme; TEM beta-lactamase	ampicillin, monobactam, cephalosporin, penam, penem	3000637, 0000004, 0000032, 3000008, 3003706	3000557	3000014	5	0	0	0	0	1	1.74027	0	0	0	0	0	0	80	61.1298	0	0	0	0	0	0	0	0	0	0	0	0	7	20.3755	0	0	21	56.7361	0	0	0	0	162	32.7708	4	3.61755	0	0	11
CARD_100926_TM_#06	antibiotic inactivation enzyme; TEM beta-lactamase	ampicillin, monobactam, cephalosporin, penam, penem	3000637, 0000004, 0000032, 3000008, 3003706	3000557	3000014	5	0	0	0	0	11	33.7081	0	0	6	2.53392	0	0	114	105.743	0	0	1	0.965541	12	10.5894	0	0	0	0	4	2.11967	55	167.54	0	0	8	23.7014	0	0	2	10.6812	241	51.5205	0	0	21	16.8139	36
CARD_100926_TM_#04	antibiotic inactivation enzyme; TEM beta-lactamase	ampicillin, monobactam, cephalosporin, penam, penem	3000637, 0000004, 0000032, 3000008, 3003706	3000557	3000014	5	0	0	0	0	0	0	0	0	0	0	0	0	72	48.4017	0	0	0	0	0	0	0	0	0	0	0	0	0	0	0	0	25	63.9576	0	0	0	0	257	37.2727	1	0.602925	12	4.25995	14
CARD_102608_TM_#01	antibiotic inactivation enzyme; tet(49)	tetracycline antibiotic	3000050	3000557	3004582	4	0	0	1	0.340102	0	0	0	0	0	0	2	0.0802672	8	0.36999	0	0	0	0	0	0	4	1.29555	0	0	0	0	0	0	0	0	0	0	0	0	0	0	0	0	2	0.0662035	0	0	0
CARD_100808_TM_#01	antibiotic inactivation enzyme; tet(56)	tetracycline antibiotic	3000050	3000557	3004603	4	0	0	0	0	0	0	0	0	0	0	0	0	6	0.274452	0	0	0	0	0	0	0	0	0	0	0	0	0	0	0	0	0	0	0	0	0	0	0	0	2	0.0643528	0	0	0
RESF_303016_TM_#02	antibiotic inactivation enzyme; Tet(X6)	tetracycline antibiotic	3000050	3000557	3005056	4	0	0	29	50.2781	3	1.67066	0	0	0	0	79	15.1786	429	93.124	0	0	0	0	0	0	7	11.7744	257	482.374	0	0	0	0	0	0	3210	2358.77	54	26.2111	0	0	1789	90.9906	0	0	0	0	1
RESF_303016_TM_#01	antibiotic inactivation enzyme; Tet(X6)	tetracycline antibiotic	3000050	3000557	3005056	4	0	0	0	0	0	0	0	0	0	0	49	5.2727	472	57.2869	0	0	0	0	0	0	0	0	0	0	0	0	0	0	0	0	2574	1049.34	55	14.5298	0	0	490	14.1146	0	0	0	0	63
RESF_303016_TM_#03	antibiotic inactivation enzyme; Tet(X6)	tetracycline antibiotic	3000050	3000557	3005056	4	0	0	0	0	0	0	0	0	0	0	4	4.54847	61	86.7412	0	0	0	0	0	0	0	0	0	0	0	0	0	0	0	0	563	2601.05	1	2.75437	0	0	300	114.951	0	0	0	0	0
RESF_303016_TM_#04	antibiotic inactivation enzyme; Tet(X6)	tetracycline antibiotic	3000050	3000557	3005056	4	0	0	0	0	0	0	0	0	0	0	17	8.22918	106	62.1839	0	0	0	0	0	0	2	7.3133	0	0	0	0	0	0	0	0	616	1081.07	1	1.0778	0	0	377	49.4995	2	0.744789	0	0	0
RESF_303014_TM_#01	antibiotic inactivation enzyme; tetX	tigecycline, tetracycline, doxycycline, minocycline, chlortetracycline, demeclocycline, oxytetracycline, tetracycline antibiotic	0000030, 0000051, 0000069, 3000152, 3000528, 3000667, 3000668, 3000050	3000557	3000205	4	0	0	10	57.8173	5	9.32364	0	0	0	0	12	8.20276	59	85.2491	0	0	0	0	0	0	3	22.4275	39	259.73	0	0	23	71.3355	0	0	3650	10345.4	3	4.95787	0	0	495	104.942	0	0	0	0	492
RESF_303014_TM_#07	antibiotic inactivation enzyme; tetX	tigecycline, tetracycline, doxycycline, minocycline, chlortetracycline, demeclocycline, oxytetracycline, tetracycline antibiotic	0000030, 0000051, 0000069, 3000152, 3000528, 3000667, 3000668, 3000050	3000557	3000205	4	0	0	13	33.1599	0	0	0	0	0	0	60	18.7401	238	92.0748	0	0	0	0	0	0	6	14.8417	213	777.823	0	0	0	0	0	0	9492	11865.5	35	27.5632	0	0	1164	104.455	1	0.248263	0	0	1297
CARD_101307_TM_#01	antibiotic inactivation enzyme; THIN-B	carbapenem, cephalosporin, penam	0000020, 0000032, 3000008	3000557	3000851	7	625	10.3436	0	0	607	65.1833	6	0.163574	1569	68.5749	2023	79.8018	32	1.38636	6	0.174392	259	8.67483	0	0	0	0	0	0	903	36.0148	0	0	236	18.3811	4	0.600825	1885	179.796	0	0	0	0	33880	1103.03	6041	168.713	8
CARD_102311_TM_#02	antibiotic inactivation enzyme; TMB-1	ceftazidime, carbapenem, cephalosporin, cephamycin	0000060, 0000020, 0000032, 0000044	3000557	3004105	7	0	0	0	0	0	0	0	0	0	0	0	0	0	0	0	0	0	0	0	0	0	0	0	0	0	0	0	0	1	1.1154	0	0	0	0	0	0	0	0	0	0	0	0	0
CARD_102403_TM_#01	antibiotic inactivation enzyme; TRU-1	cephalosporin, penam	0000032, 3000008	3000557	3004450	6	0	0	0	0	0	0	0	0	0	0	0	0	0	0	0	0	0	0	0	0	0	0	0	0	0	0	0	0	0	0	0	0	0	0	0	0	6930	73.4486	7	0.216511	0	0	0
CARD_100366_TM_#01	antibiotic inactivation enzyme; TUS-1	carbapenem, cephalosporin, cephamycin	0000020, 0000032, 0000044	3000557	3000844	7	0	0	0	0	0	0	0	0	0	0	0	0	0	0	0	0	0	0	0	0	6	2.42217	0	0	0	0	0	0	0	0	0	0	0	0	0	0	0	0	0	0	0	0	0
CARD_101120_TM_#01	antibiotic inactivation enzyme; vatB	pristinamycin IIA, madumycin II, griseoviridin, dalfopristin, streptogramin antibiotic	3000669, 3000672, 3000673, 3000674, 0000026	3000557	3002841	5	0	0	0	0	6	1.0004	8	0.341241	95	6.31229	8	0.481298	0	0	0	0	0	0	2	0.141197	47	23.3189	0	0	2	0.122695	0	0	0	0	0	0	35	5.06578	182	122.79	0	0	0	0	0	0	1
RESF_302553_TM_#01	antibiotic inactivation enzyme; vatD	pristinamycin IIA, madumycin II, griseoviridin, dalfopristin, streptogramin antibiotic	3000669, 3000672, 3000673, 3000674, 0000026	3000557	3002843	5	0	0	0	0	0	0	0	0	0	0	0	0	2	0.143677	0	0	0	0	0	0	0	0	0	0	0	0	0	0	0	0	0	0	0	0	0	0	0	0	0	0	0	0	0
CARD_102018_TM_#01	antibiotic inactivation enzyme; vatF	pristinamycin IIA, madumycin II, griseoviridin, dalfopristin, streptogramin antibiotic	3000669, 3000672, 3000673, 3000674, 0000026	3000557	3003744	5	2	0.0454233	0	0	828	129.077	2947	119.985	42	2.66268	742	42.2797	0	0	0	0	12	0.590283	0	0	14	6.48251	0	0	1101	62.4037	0	0	1108	124.087	0	0	1863	257.311	0	0	0	0	93	4.394	0	0	0
CARD_102161_TM_#01	antibiotic inactivation enzyme; VatI	pristinamycin IIA, madumycin II, griseoviridin, dalfopristin, streptogramin antibiotic	3000669, 3000672, 3000673, 3000674, 0000026	3000557	3003987	5	0	0	0	0	0	0	0	0	0	0	0	0	0	0	0	0	0	0	0	0	0	0	0	0	0	0	0	0	0	0	0	0	0	0	0	0	0	0	0	0	0	0	24
CARD_101995_TM_#01	antibiotic inactivation enzyme; VCC-1	monobactam, carbapenem, penam	0000004, 0000020, 3000008	3000557	3003713	6	0	0	0	0	0	0	0	0	0	0	0	0	0	0	0	0	0	0	0	0	0	0	0	0	0	0	0	0	0	0	0	0	0	0	6	2.86024	0	0	2	0.0706355	0	0	0
NCBI_201720_TM_#02	antibiotic inactivation enzyme; VEB beta-lactamase	monobactam, cephalosporin	0000004, 0000032	3000557	3000043	5	0	0	18	212.873	0	0	0	0	0	0	0	0	0	0	0	0	0	0	0	0	0	0	0	0	0	0	0	0	0	0	0	0	0	0	0	0	0	0	0	0	0	0	0
NCBI_201720_TM_#03	antibiotic inactivation enzyme; VEB beta-lactamase	monobactam, cephalosporin	0000004, 0000032	3000557	3000043	5	0	0	8	63.5821	0	0	0	0	0	0	0	0	0	0	0	0	0	0	10	30.4396	0	0	0	0	0	0	0	0	0	0	0	0	0	0	0	0	0	0	0	0	0	0	0
NCBI_201720_TM_#04	antibiotic inactivation enzyme; VEB beta-lactamase	monobactam, cephalosporin	0000004, 0000032	3000557	3000043	5	0	0	3	10.8407	0	0	0	0	0	0	0	0	0	0	0	0	0	0	7	3.43874	0	0	0	0	0	0	0	0	0	0	0	0	0	0	0	0	0	0	0	0	0	0	1
NCBI_201720_TM_#05	antibiotic inactivation enzyme; VEB beta-lactamase	monobactam, cephalosporin	0000004, 0000032	3000557	3000043	5	0	0	11	22.6977	0	0	0	0	0	0	0	0	0	0	0	0	0	0	0	0	0	0	0	0	0	0	0	0	0	0	0	0	0	0	0	0	0	0	0	0	0	0	4
NCBI_201720_TM_#08	antibiotic inactivation enzyme; VEB beta-lactamase	monobactam, cephalosporin	0000004, 0000032	3000557	3000043	5	0	0	6	106.74	0	0	0	0	0	0	0	0	0	0	0	0	0	0	2	8.84248	0	0	0	0	0	0	0	0	0	0	0	0	0	0	0	0	0	0	0	0	0	0	0
CARD_102164_TM_#01	antibiotic inactivation enzyme; vgbC	pristinamycin IA, quinupristin, pristinamycin IB, virginiamycin S2, vernamycin B-gamma, vernamycin C, patricin A, patricin B, ostreogrycin B3, streptogramin antibiotic	3000583, 3000584, 3000675, 3000677, 3000678, 3000679, 3000680, 3000681, 3000682, 0000026	3000557	3003990	5	0	0	0	0	0	0	0	0	0	0	0	0	13	0.610816	0	0	0	0	0	0	0	0	0	0	0	0	0	0	0	0	0	0	0	0	0	0	3	0.0327304	0	0	0	0	0
CARD_102412_TM_#01	antibiotic inactivation enzyme; Vibrio anguillarum chloramphenicol acetyltransferase	chloramphenicol, phenicol antibiotic	3000385, 3000387	3000557	3004460	4	75	1.85978	156	77.5674	72	11.5622	9423	394.694	0	0	682	40.1982	0	0	4	0.174981	3	0.142612	160	10.7855	2805	1355.13	272	156.952	10794	635.799	108729	29087.3	2585	298.11	296	65.9591	264	37.4429	159	104.803	128	2.03212	230	11.1898	12	0.492927	15
CARD_102340_TM_#01	antibiotic inactivation enzyme; Vibrio cholerae varG	meropenem, carbapenem	0000073, 0000020	3000557	3004289	7	0	0	4	1.53497	196	24.0666	6	0.191776	0	0	0	0	0	0	0	0	0	0	286	14.6756	45	16.399	20620	9008.25	0	0	177	35.5765	190	16.5276	45	7.52677	0	0	4	1.99469	9273	110.62	0	0	0	0	66
RESF_302268_TM_#01	antibiotic inactivation enzyme; VMB-1	carbapenem	20	3000557	3005015	7	0	0	276	114.799	0	0	0	0	0	0	0	0	0	0	0	0	0	0	0	0	0	0	0	0	0	0	519	115.879	575	54.8844	0	0	0	0	0	0	0	0	0	0	0	0	0
ARGA_401848_TM_#01	antibiotic inactivation enzyme; vph	viomycin, peptide antibiotic	0000018, 3000053	3000557	3003061	4	0	0	0	0	0	0	0	0	0	0	0	0	0	0	0	0	0	0	0	0	0	0	0	0	0	0	0	0	0	0	0	0	0	0	0	0	0	0	12	0.406601	0	0	0
NCBI_205089_TM_#05	antibiotic inactivation enzyme; y56 beta-lactamase	cephalosporin, penam	0000032, 3000008	3000557	3003558	6	8	1.27746	0	0	202	215.167	415	123.154	3	1.25132	5112	2106.93	0	0	0	0	6	2.35664	0	0	8	24.9194	16	80.0016	71	34.844	0	0	192	161.929	2	2.85015	264	276.173	0	0	0	0	19	8.08165	0	0	0
NCBI_205089_TM_#09	antibiotic inactivation enzyme; y56 beta-lactamase	cephalosporin, penam	0000032, 3000008	3000557	3003558	6	15	2.869	0	0	223	285.889	796	296.359	15	10.558	1025	404.803	0	0	0	0	0	0	0	0	2	9.01103	0	0	618	285.538	0	0	200	233.318	0	0	317	397.36	0	0	0	0	40	15.6085	0	0	0
NCBI_205089_TM_#04	antibiotic inactivation enzyme; y56 beta-lactamase	cephalosporin, penam	0000032, 3000008	3000557	3003558	6	0	0	0	0	53	82.0446	248	156.51	3	1.87698	4557	3583.41	0	0	0	0	3	1.44831	0	0	3	14.0172	0	0	56	48.1677	0	0	61	88.6284	0	0	212	570.997	0	0	0	0	6	2.81365	0	0	0
NCBI_205089_TM_#06	antibiotic inactivation enzyme; y56 beta-lactamase	cephalosporin, penam	0000032, 3000008	3000557	3003558	6	0	0	0	0	170	289.389	324	244.103	5	3.31231	131	158.795	0	0	0	0	0	0	0	0	0	0	0	0	142	95.4184	0	0	116	226.7	0	0	168	289.117	0	0	0	0	1	0.506457	0	0	0
CARD_102656_TM_#01	antibiotic inactivation enzyme; Yrc-1	cephalosporin, penam	0000032, 3000008	3000557	3005035	6	1119	18.5606	0	0	171	18.4035	1707	48.3133	628	27.4261	1073	41.7106	1543	68.3817	170	4.94897	1809	60.8295	2313	106.077	140	45.662	131	51.0058	17827	708.188	0	0	3418	265.813	0	0	2932	281.516	24	10.1356	8382	86.2257	275	8.91508	138	3.76895	3229
RESF_302452_TM_#01	antibiotic target modifying enzyme; 23S rRNA (adenine(2058)-N(6))-methyltransferase Erm(A)	macrolide antibiotic, lincosamide antibiotic, streptogramin antibiotic	0000000, 0000017, 0000026	3000519	3005099	6	8	0.214621	0	0	0	0	0	0	0	0	0	0	0	0	0	0	0	0	0	0	0	0	0	0	0	0	0	0	0	0	0	0	0	0	0	0	0	0	0	0	0	0	0
CARD_102704_TM_#01	antibiotic target modifying enzyme; 23S rRNA (adenine(2058)-N(6))-methyltransferase Erm(A)	macrolide antibiotic, lincosamide antibiotic, streptogramin antibiotic	0000000, 0000017, 0000026	3000519	3005099	6	0	0	1	0.43801	1758	243.641	0	0	0	0	478	24.3433	18	1.07203	0	0	0	0	273	16.0099	4	1.68223	5	2.44844	4	0.195454	0	0	0	0	0	0	0	0	0	0	0	0	0	0	0	0	10
CARD_101974_TM_#01	antibiotic target modifying enzyme; Bacillus subtilis mprF	defensin, peptide antibiotic	3000693, 3000053	3000519	3003324	5	0	0	17	5.59189	0	0	5	0.140117	0	0	0	0	2	0.0924976	0	0	0	0	10	0.45787	0	0	0	0	0	0	0	0	0	0	6	0.905342	0	0	0	0	0	0	0	0	0	0	0
CARD_102028_TM_#01	antibiotic target modifying enzyme; Brucella suis mprF	defensin, peptide antibiotic	3000693, 3000053	3000519	3003772	5	0	0	0	0	0	0	0	0	0	0	0	0	4	0.184995	0	0	0	0	0	0	0	0	0	0	0	0	1	0.182084	5	0.393671	0	0	0	0	1	0.446795	209	2.2307	0	0	22	0.619913	0
CARD_100655_TM_#01	antibiotic target modifying enzyme; cfrA	lincomycin, clindamycin, azidamfenicol, chloramphenicol, thiamphenicol, pristinamycin IIA, tiamulin, madumycin II, griseoviridin, dalfopristin	0000046, 0000066, 3000382, 3000385, 3000456, 3000669, 3000671, 3000672, 3000673, 3000674	3000519	3003441	8	0	0	0	0	0	0	0	0	0	0	0	0	0	0	0	0	0	0	0	0	0	0	0	0	68	3.20551	0	0	0	0	102	18.8141	0	0	0	0	0	0	0	0	0	0	0
CARD_100655_TM_#02	antibiotic target modifying enzyme; cfrA	lincomycin, clindamycin, azidamfenicol, chloramphenicol, thiamphenicol, pristinamycin IIA, tiamulin, madumycin II, griseoviridin, dalfopristin	0000046, 0000066, 3000382, 3000385, 3000456, 3000669, 3000671, 3000672, 3000673, 3000674	3000519	3003441	8	0	0	0	0	0	0	0	0	0	0	0	0	0	0	0	0	0	0	0	0	0	0	0	0	0	0	0	0	0	0	2	25.6514	0	0	0	0	0	0	0	0	0	0	0
CARD_102328_TM_#01	antibiotic target modifying enzyme; cfrC	chloramphenicol, florfenicol, lincosamide antibiotic, streptogramin antibiotic, oxazolidinone antibiotic, phenicol antibiotic	3000385, 3000461, 0000017, 0000026, 3000079, 3000387	3000519	3004146	8	2	0.0338151	0	0	0	0	0	0	11	0.477441	4	0.160482	69	3.1124	15	0.436312	0	0	0	0	9	2.85274	0	0	12	0.465097	0	0	0	0	0	0	0	0	132	58.3205	2	0.0211191	4	0.132407	0	0	35
CARD_102104_TM_#01	antibiotic target modifying enzyme; cipA	lincomycin, clindamycin, azidamfenicol, chloramphenicol, thiamphenicol, pristinamycin IIA, tiamulin, madumycin II, griseoviridin, dalfopristin, lincosamide antibiotic, streptogramin antibiotic, oxazolidinone antibiotic, phenicol antibiotic	0000046, 0000066, 3000382, 3000385, 3000456, 3000669, 3000671, 3000672, 3000673, 3000674, 0000017, 0000026, 3000079, 3000387	3000519	3003907	8	0	0	0	0	0	0	0	0	0	0	2	0.0802672	5	0.222518	0	0	0	0	0	0	0	0	0	0	0	0	0	0	0	0	0	0	0	0	0	0	0	0	0	0	0	0	14
CARD_102621_TM_#04	antibiotic target modifying enzyme; clbA	lincomycin, clindamycin, azidamfenicol, chloramphenicol, thiamphenicol, pristinamycin IIA, tiamulin, madumycin II, griseoviridin, dalfopristin, lincosamide antibiotic, streptogramin antibiotic, oxazolidinone antibiotic, phenicol antibiotic	0000046, 0000066, 3000382, 3000385, 3000456, 3000669, 3000671, 3000672, 3000673, 3000674, 0000017, 0000026, 3000079, 3000387	3000519	3002814	8	0	0	0	0	0	0	0	0	2	1.07256	0	0	0	0	0	0	0	0	0	0	0	0	0	0	0	0	0	0	0	0	0	0	0	0	0	0	0	0	0	0	0	0	0
CARD_102621_TM_#05	antibiotic target modifying enzyme; clbA	lincomycin, clindamycin, azidamfenicol, chloramphenicol, thiamphenicol, pristinamycin IIA, tiamulin, madumycin II, griseoviridin, dalfopristin, lincosamide antibiotic, streptogramin antibiotic, oxazolidinone antibiotic, phenicol antibiotic	0000046, 0000066, 3000382, 3000385, 3000456, 3000669, 3000671, 3000672, 3000673, 3000674, 0000017, 0000026, 3000079, 3000387	3000519	3002814	8	0	0	0	0	0	0	0	0	2	0.77668	0	0	0	0	0	0	0	0	2	0.817829	0	0	0	0	0	0	0	0	0	0	0	0	0	0	0	0	0	0	0	0	0	0	0
CARD_102621_TM_#01	antibiotic target modifying enzyme; clbA	lincomycin, clindamycin, azidamfenicol, chloramphenicol, thiamphenicol, pristinamycin IIA, tiamulin, madumycin II, griseoviridin, dalfopristin, lincosamide antibiotic, streptogramin antibiotic, oxazolidinone antibiotic, phenicol antibiotic	0000046, 0000066, 3000382, 3000385, 3000456, 3000669, 3000671, 3000672, 3000673, 3000674, 0000017, 0000026, 3000079, 3000387	3000519	3002814	8	0	0	0	0	0	0	0	0	0	0	0	0	0	0	0	0	0	0	2	0.785998	0	0	0	0	0	0	0	0	0	0	0	0	0	0	0	0	0	0	0	0	0	0	0
CARD_102621_TM_#09	antibiotic target modifying enzyme; clbA	lincomycin, clindamycin, azidamfenicol, chloramphenicol, thiamphenicol, pristinamycin IIA, tiamulin, madumycin II, griseoviridin, dalfopristin, lincosamide antibiotic, streptogramin antibiotic, oxazolidinone antibiotic, phenicol antibiotic	0000046, 0000066, 3000382, 3000385, 3000456, 3000669, 3000671, 3000672, 3000673, 3000674, 0000017, 0000026, 3000079, 3000387	3000519	3002814	8	0	0	0	0	0	0	0	0	0	0	0	0	0	0	0	0	0	0	0	0	0	0	0	0	0	0	0	0	0	0	0	0	0	0	0	0	0	0	0	0	0	0	6
CARD_100113_TM_#01	antibiotic target modifying enzyme; clbB	lincomycin, clindamycin, azidamfenicol, chloramphenicol, thiamphenicol, pristinamycin IIA, tiamulin, madumycin II, griseoviridin, dalfopristin, lincosamide antibiotic, streptogramin antibiotic, oxazolidinone antibiotic, phenicol antibiotic	0000046, 0000066, 3000382, 3000385, 3000456, 3000669, 3000671, 3000672, 3000673, 3000674, 0000017, 0000026, 3000079, 3000387	3000519	3002815	8	0	0	0	0	0	0	0	0	0	0	0	0	0	0	0	0	0	0	0	0	0	0	0	0	0	0	0	0	0	0	0	0	0	0	0	0	0	0	0	0	0	0	2
CARD_101545_TM_#01	antibiotic target modifying enzyme; clbC	lincomycin, clindamycin, azidamfenicol, chloramphenicol, thiamphenicol, pristinamycin IIA, tiamulin, madumycin II, griseoviridin, dalfopristin, lincosamide antibiotic, streptogramin antibiotic, oxazolidinone antibiotic, phenicol antibiotic	0000046, 0000066, 3000382, 3000385, 3000456, 3000669, 3000671, 3000672, 3000673, 3000674, 0000017, 0000026, 3000079, 3000387	3000519	3002816	8	0	0	0	0	0	0	0	0	0	0	0	0	0	0	0	0	0	0	0	0	0	0	0	0	0	0	0	0	0	0	0	0	0	0	0	0	0	0	0	0	0	0	0
CARD_102029_TM_#01	antibiotic target modifying enzyme; Clostridium perfringens mprF	defensin, peptide antibiotic	3000693, 3000053	3000519	3003773	5	19	0.320265	5	1.70051	0	0	70	1.9806	0	0	12	0.481446	3636	165.271	0	0	0	0	5	0.229983	0	0	0	0	0	0	11	1.96506	0	0	0	0	12	1.16656	0	0	0	0	0	0	0	0	0
CARD_102140_TM_#01	antibiotic target modifying enzyme; emtA	macrolide antibiotic, lincosamide antibiotic	0000000, 0000017	3000519	3004669	6	0	0	0	0	0	0	312	8.81429	0	0	2	0.0802672	0	0	0	0	0	0	0	0	0	0	0	0	1733	68.4073	0	0	0	0	0	0	74	7.1138	0	0	0	0	0	0	0	0	271
CARD_101647_TM_#01	antibiotic target modifying enzyme; Erm 23S ribosomal RNA methyltransferase	macrolide antibiotic, lincosamide antibiotic, streptogramin antibiotic	0000000, 0000017, 0000026	3000519	3000560	5	0	0	0	0	0	0	0	0	0	0	0	0	2	0.253622	0	0	0	0	0	0	0	0	0	0	0	0	0	0	0	0	1	0.413732	0	0	0	0	0	0	0	0	10	0.76962	0
CARD_101647_TM_#02	antibiotic target modifying enzyme; Erm 23S ribosomal RNA methyltransferase	macrolide antibiotic, lincosamide antibiotic, streptogramin antibiotic	0000000, 0000017, 0000026	3000519	3000560	5	0	0	0	0	0	0	0	0	0	0	0	0	0	0	0	0	0	0	0	0	0	0	0	0	0	0	0	0	0	0	0	0	0	0	5	21.9101	0	0	0	0	0	0	0
CARD_100008_TM_#01	antibiotic target modifying enzyme; Erm(34)	erythromycin, roxithromycin, lincomycin, telithromycin, clarithromycin, clindamycin, tylosin, spiramycin, azithromycin, dirithromycin, pristinamycin IA, quinupristin, pristinamycin IIA, madumycin II, griseoviridin, dalfopristin, pristinamycin IB, virginiamycin S2, vernamycin B-gamma, vernamycin C, patricin A, patricin B, ostreogrycin B3, oleandomycin, macrolide antibiotic, lincosamide antibiotic,…	0000006, 0000027, 0000046, 0000057, 0000065, 0000066, 3000145, 3000156, 3000158, 3000176, 3000583, 3000584, 3000669, 3000672, 3000673, 3000674, 3000675, 3000677, 3000678, 3000679, 3000680, 3000681, 3000682, 3000867, 0000000, 0000017, 0000026	3000519	3000600	6	0	0	0	0	0	0	0	0	0	0	0	0	0	0	0	0	0	0	0	0	0	0	0	0	0	0	0	0	2	0.159343	0	0	0	0	0	0	0	0	0	0	0	0	0
CARD_101346_TM_#01	antibiotic target modifying enzyme; Erm(35)	erythromycin, roxithromycin, lincomycin, telithromycin, clarithromycin, clindamycin, tylosin, spiramycin, azithromycin, dirithromycin, pristinamycin IA, quinupristin, pristinamycin IIA, madumycin II, griseoviridin, dalfopristin, pristinamycin IB, virginiamycin S2, vernamycin B-gamma, vernamycin C, patricin A, patricin B, ostreogrycin B3, oleandomycin, macrolide antibiotic, lincosamide antibiotic,…	0000006, 0000027, 0000046, 0000057, 0000065, 0000066, 3000145, 3000156, 3000158, 3000176, 3000583, 3000584, 3000669, 3000672, 3000673, 3000674, 3000675, 3000677, 3000678, 3000679, 3000680, 3000681, 3000682, 3000867, 0000000, 0000017, 0000026	3000519	3000604	6	0	0	0	0	0	0	0	0	0	0	0	0	0	0	0	0	0	0	0	0	23	8.58206	0	0	0	0	0	0	0	0	57	9.79392	0	0	0	0	0	0	0	0	0	0	0
CARD_100835_TM_#01	antibiotic target modifying enzyme; Erm(36)	erythromycin, roxithromycin, lincomycin, telithromycin, clarithromycin, clindamycin, tylosin, spiramycin, azithromycin, dirithromycin, pristinamycin IA, quinupristin, pristinamycin IIA, madumycin II, griseoviridin, dalfopristin, pristinamycin IB, virginiamycin S2, vernamycin B-gamma, vernamycin C, patricin A, patricin B, ostreogrycin B3, oleandomycin, macrolide antibiotic, lincosamide antibiotic,…	0000006, 0000027, 0000046, 0000057, 0000065, 0000066, 3000145, 3000156, 3000158, 3000176, 3000583, 3000584, 3000669, 3000672, 3000673, 3000674, 3000675, 3000677, 3000678, 3000679, 3000680, 3000681, 3000682, 3000867, 0000000, 0000017, 0000026	3000519	3000605	6	0	0	0	0	0	0	0	0	0	0	0	0	0	0	0	0	0	0	0	0	0	0	30	12.068	0	0	0	0	0	0	6	0.97823	0	0	0	0	0	0	0	0	0	0	0
CARD_100435_TM_#01	antibiotic target modifying enzyme; Erm(37)	erythromycin, roxithromycin, lincomycin, telithromycin, clarithromycin, clindamycin, tylosin, spiramycin, azithromycin, dirithromycin, pristinamycin IA, quinupristin, pristinamycin IIA, madumycin II, griseoviridin, dalfopristin, pristinamycin IB, virginiamycin S2, vernamycin B-gamma, vernamycin C, patricin A, patricin B, ostreogrycin B3, oleandomycin, macrolide antibiotic, lincosamide antibiotic,…	0000006, 0000027, 0000046, 0000057, 0000065, 0000066, 3000145, 3000156, 3000158, 3000176, 3000583, 3000584, 3000669, 3000672, 3000673, 3000674, 3000675, 3000677, 3000678, 3000679, 3000680, 3000681, 3000682, 3000867, 0000000, 0000017, 0000026	3000519	3000392	6	0	0	1	0.652075	0	0	0	0	0	0	8	0.553193	0	0	0	0	0	0	0	0	0	0	0	0	0	0	0	0	0	0	0	0	0	0	0	0	0	0	0	0	0	0	0
RESF_302507_TM_#01	antibiotic target modifying enzyme; Erm(38)	erythromycin, roxithromycin, lincomycin, telithromycin, clarithromycin, clindamycin, tylosin, spiramycin, azithromycin, dirithromycin, pristinamycin IA, quinupristin, pristinamycin IIA, madumycin II, griseoviridin, dalfopristin, pristinamycin IB, virginiamycin S2, vernamycin B-gamma, vernamycin C, patricin A, patricin B, ostreogrycin B3, oleandomycin, macrolide antibiotic, lincosamide antibiotic,…	0000006, 0000027, 0000046, 0000057, 0000065, 0000066, 3000145, 3000156, 3000158, 3000176, 3000583, 3000584, 3000669, 3000672, 3000673, 3000674, 3000675, 3000677, 3000678, 3000679, 3000680, 3000681, 3000682, 3000867, 0000000, 0000017, 0000026	3000519	3000601	6	0	0	0	0	0	0	0	0	1	0.0441642	0	0	0	0	0	0	0	0	4	0.18458	0	0	0	0	0	0	0	0	0	0	0	0	4	0.368615	0	0	0	0	0	0	0	0	0
RESF_302508_TM_#01	antibiotic target modifying enzyme; Erm(39)	erythromycin, roxithromycin, lincomycin, telithromycin, clarithromycin, clindamycin, tylosin, spiramycin, azithromycin, dirithromycin, pristinamycin IA, quinupristin, pristinamycin IIA, madumycin II, griseoviridin, dalfopristin, pristinamycin IB, virginiamycin S2, vernamycin B-gamma, vernamycin C, patricin A, patricin B, ostreogrycin B3, oleandomycin, macrolide antibiotic, lincosamide antibiotic,…	0000006, 0000027, 0000046, 0000057, 0000065, 0000066, 3000145, 3000156, 3000158, 3000176, 3000583, 3000584, 3000669, 3000672, 3000673, 3000674, 3000675, 3000677, 3000678, 3000679, 3000680, 3000681, 3000682, 3000867, 0000000, 0000017, 0000026	3000519	3000602	6	0	0	0	0	0	0	0	0	2	0.112619	0	0	0	0	0	0	0	0	2	0.112823	0	0	0	0	0	0	0	0	0	0	0	0	0	0	0	0	0	0	0	0	34	1.22698	0
RESF_302509_TM_#01	antibiotic target modifying enzyme; erm(40)	macrolide antibiotic, lincosamide antibiotic, streptogramin antibiotic	0000000, 0000017, 0000026	3000519	3004606	6	0	0	0	0	0	0	0	0	4	0.219744	1	0.0498412	0	0	0	0	0	0	12	0.684749	0	0	0	0	0	0	0	0	0	0	0	0	0	0	0	0	0	0	0	0	0	0	0
RESF_302512_TM_#03	antibiotic target modifying enzyme; Erm(42)	macrolide antibiotic, lincosamide antibiotic, streptogramin antibiotic	0000000, 0000017, 0000026	3000519	3003106	6	0	0	0	0	0	0	0	0	0	0	0	0	0	0	0	0	0	0	0	0	0	0	0	0	0	0	13	3.39057	0	0	58	12.5371	0	0	0	0	12	0.183774	0	0	0	0	0
RESF_302512_TM_#01	antibiotic target modifying enzyme; Erm(42)	macrolide antibiotic, lincosamide antibiotic, streptogramin antibiotic	0000000, 0000017, 0000026	3000519	3003106	6	0	0	0	0	0	0	0	0	0	0	0	0	0	0	0	0	0	0	0	0	0	0	0	0	0	0	0	0	0	0	6	11.5431	0	0	0	0	2	0.165966	0	0	0	0	0
CARD_101452_TM_#01	antibiotic target modifying enzyme; Erm(43)	macrolide antibiotic, lincosamide antibiotic, streptogramin antibiotic	0000000, 0000017, 0000026	3000519	3003205	6	0	0	0	0	0	0	0	0	0	0	0	0	0	0	0	0	0	0	0	0	0	0	0	0	0	0	0	0	0	0	0	0	0	0	2	1.06812	0	0	0	0	0	0	0
CARD_102618_TM_#01	antibiotic target modifying enzyme; erm(46)	macrolide antibiotic, lincosamide antibiotic, streptogramin antibiotic	0000000, 0000017, 0000026	3000519	3004596	6	0	0	26	9.36878	0	0	0	0	4	0.200211	18	0.818725	7937	410.168	2	0.0664927	0	0	0	0	0	0	0	0	0	0	0	0	0	0	0	0	0	0	0	0	5619	67.435	0	0	0	0	0
CARD_102063_TM_#01	antibiotic target modifying enzyme; Erm(49)	macrolide antibiotic, lincosamide antibiotic, streptogramin antibiotic	0000000, 0000017, 0000026	3000519	3004626	6	0	0	0	0	0	0	6	0.162932	0	0	0	0	0	0	68	1.99063	0	0	0	0	0	0	0	0	0	0	0	0	0	0	3	0.452671	0	0	0	0	0	0	4	0.132407	0	0	0
CARD_100931_TM_#02	antibiotic target modifying enzyme; ErmA	erythromycin, roxithromycin, lincomycin, telithromycin, clarithromycin, clindamycin, tylosin, spiramycin, azithromycin, dirithromycin, pristinamycin IA, quinupristin, pristinamycin IIA, madumycin II, griseoviridin, dalfopristin, pristinamycin IB, virginiamycin S2, vernamycin B-gamma, vernamycin C, patricin A, patricin B, ostreogrycin B3, oleandomycin, macrolide antibiotic, lincosamide antibiotic,…	0000006, 0000027, 0000046, 0000057, 0000065, 0000066, 3000145, 3000156, 3000158, 3000176, 3000583, 3000584, 3000669, 3000672, 3000673, 3000674, 3000675, 3000677, 3000678, 3000679, 3000680, 3000681, 3000682, 3000867, 0000000, 0000017, 0000026	3000519	3000347	6	0	0	0	0	0	0	0	0	0	0	11	3.03762	0	0	0	0	0	0	0	0	0	0	0	0	0	0	0	0	0	0	2	2.07984	0	0	2	6.15853	0	0	0	0	0	0	0
CARD_100931_TM_#01	antibiotic target modifying enzyme; ErmA	erythromycin, roxithromycin, lincomycin, telithromycin, clarithromycin, clindamycin, tylosin, spiramycin, azithromycin, dirithromycin, pristinamycin IA, quinupristin, pristinamycin IIA, madumycin II, griseoviridin, dalfopristin, pristinamycin IB, virginiamycin S2, vernamycin B-gamma, vernamycin C, patricin A, patricin B, ostreogrycin B3, oleandomycin, macrolide antibiotic, lincosamide antibiotic,…	0000006, 0000027, 0000046, 0000057, 0000065, 0000066, 3000145, 3000156, 3000158, 3000176, 3000583, 3000584, 3000669, 3000672, 3000673, 3000674, 3000675, 3000677, 3000678, 3000679, 3000680, 3000681, 3000682, 3000867, 0000000, 0000017, 0000026	3000519	3000347	6	0	0	0	0	0	0	0	0	0	0	0	0	0	0	0	0	0	0	0	0	0	0	0	0	0	0	0	0	0	0	0	0	0	0	1	11.0258	0	0	0	0	0	0	0
CARD_100931_TM_#03	antibiotic target modifying enzyme; ErmA	erythromycin, roxithromycin, lincomycin, telithromycin, clarithromycin, clindamycin, tylosin, spiramycin, azithromycin, dirithromycin, pristinamycin IA, quinupristin, pristinamycin IIA, madumycin II, griseoviridin, dalfopristin, pristinamycin IB, virginiamycin S2, vernamycin B-gamma, vernamycin C, patricin A, patricin B, ostreogrycin B3, oleandomycin, macrolide antibiotic, lincosamide antibiotic,…	0000006, 0000027, 0000046, 0000057, 0000065, 0000066, 3000145, 3000156, 3000158, 3000176, 3000583, 3000584, 3000669, 3000672, 3000673, 3000674, 3000675, 3000677, 3000678, 3000679, 3000680, 3000681, 3000682, 3000867, 0000000, 0000017, 0000026	3000519	3000347	6	0	0	0	0	0	0	0	0	0	0	0	0	0	0	0	0	0	0	0	0	0	0	0	0	0	0	0	0	0	0	0	0	0	0	5	21.9101	0	0	0	0	0	0	0
RESF_302462_TM_#03	antibiotic target modifying enzyme; ErmB	erythromycin, roxithromycin, lincomycin, telithromycin, clarithromycin, clindamycin, tylosin, spiramycin, azithromycin, dirithromycin, pristinamycin IA, quinupristin, pristinamycin IIA, madumycin II, griseoviridin, dalfopristin, pristinamycin IB, virginiamycin S2, vernamycin B-gamma, vernamycin C, patricin A, patricin B, ostreogrycin B3, oleandomycin, macrolide antibiotic, lincosamide antibiotic,…	0000006, 0000027, 0000046, 0000057, 0000065, 0000066, 3000145, 3000156, 3000158, 3000176, 3000583, 3000584, 3000669, 3000672, 3000673, 3000674, 3000675, 3000677, 3000678, 3000679, 3000680, 3000681, 3000682, 3000867, 0000000, 0000017, 0000026	3000519	3000375	6	5	1.52655	1	6.67122	47	81.9393	1	0.562717	0	0	10	3.65502	306	215.239	0	0	0	0	0	0	0	0	0	0	2	1.2545	0	0	0	0	6	14.1031	146	236.33	139	999.779	0	0	35	16.1995	0	0	9
RESF_302462_TM_#04	antibiotic target modifying enzyme; ErmB	erythromycin, roxithromycin, lincomycin, telithromycin, clarithromycin, clindamycin, tylosin, spiramycin, azithromycin, dirithromycin, pristinamycin IA, quinupristin, pristinamycin IIA, madumycin II, griseoviridin, dalfopristin, pristinamycin IB, virginiamycin S2, vernamycin B-gamma, vernamycin C, patricin A, patricin B, ostreogrycin B3, oleandomycin, macrolide antibiotic, lincosamide antibiotic,…	0000006, 0000027, 0000046, 0000057, 0000065, 0000066, 3000145, 3000156, 3000158, 3000176, 3000583, 3000584, 3000669, 3000672, 3000673, 3000674, 3000675, 3000677, 3000678, 3000679, 3000680, 3000681, 3000682, 3000867, 0000000, 0000017, 0000026	3000519	3000375	6	5	0.829121	0	0	49	52.5176	0	0	4	2.37092	1	0.393618	172	90.7408	0	0	0	0	0	0	0	0	0	0	8	3.15232	0	0	0	0	45	75.71	177	186.526	181	960.345	2	0.21065	22	7.27737	0	0	14
RESF_302462_TM_#09	antibiotic target modifying enzyme; ErmB	erythromycin, roxithromycin, lincomycin, telithromycin, clarithromycin, clindamycin, tylosin, spiramycin, azithromycin, dirithromycin, pristinamycin IA, quinupristin, pristinamycin IIA, madumycin II, griseoviridin, dalfopristin, pristinamycin IB, virginiamycin S2, vernamycin B-gamma, vernamycin C, patricin A, patricin B, ostreogrycin B3, oleandomycin, macrolide antibiotic, lincosamide antibiotic,…	0000006, 0000027, 0000046, 0000057, 0000065, 0000066, 3000145, 3000156, 3000158, 3000176, 3000583, 3000584, 3000669, 3000672, 3000673, 3000674, 3000675, 3000677, 3000678, 3000679, 3000680, 3000681, 3000682, 3000867, 0000000, 0000017, 0000026	3000519	3000375	6	27	3.9389	0	0	29	27.9881	6	1.44268	0	0	6	1.98079	444	201.675	0	0	0	0	0	0	2	5.426	0	0	6	1.98291	0	0	0	0	27	33.5392	414	371.358	344	1360.02	3	0.265971	53	18.4244	0	0	35
RESF_302462_TM_#10	antibiotic target modifying enzyme; ErmB	erythromycin, roxithromycin, lincomycin, telithromycin, clarithromycin, clindamycin, tylosin, spiramycin, azithromycin, dirithromycin, pristinamycin IA, quinupristin, pristinamycin IIA, madumycin II, griseoviridin, dalfopristin, pristinamycin IB, virginiamycin S2, vernamycin B-gamma, vernamycin C, patricin A, patricin B, ostreogrycin B3, oleandomycin, macrolide antibiotic, lincosamide antibiotic,…	0000006, 0000027, 0000046, 0000057, 0000065, 0000066, 3000145, 3000156, 3000158, 3000176, 3000583, 3000584, 3000669, 3000672, 3000673, 3000674, 3000675, 3000677, 3000678, 3000679, 3000680, 3000681, 3000682, 3000867, 0000000, 0000017, 0000026	3000519	3000375	6	11	1.58086	2	5.78173	17	15.7785	20	7.00131	0	0	16	5.45817	393	181.116	0	0	0	0	0	0	0	0	48	159.984	3	1.0245	0	0	0	0	24	31.0124	335	295.347	372	1540.16	1	0.0912815	37	10.489	0	0	21
RESF_302462_TM_#11	antibiotic target modifying enzyme; ErmB	erythromycin, roxithromycin, lincomycin, telithromycin, clarithromycin, clindamycin, tylosin, spiramycin, azithromycin, dirithromycin, pristinamycin IA, quinupristin, pristinamycin IIA, madumycin II, griseoviridin, dalfopristin, pristinamycin IB, virginiamycin S2, vernamycin B-gamma, vernamycin C, patricin A, patricin B, ostreogrycin B3, oleandomycin, macrolide antibiotic, lincosamide antibiotic,…	0000006, 0000027, 0000046, 0000057, 0000065, 0000066, 3000145, 3000156, 3000158, 3000176, 3000583, 3000584, 3000669, 3000672, 3000673, 3000674, 3000675, 3000677, 3000678, 3000679, 3000680, 3000681, 3000682, 3000867, 0000000, 0000017, 0000026	3000519	3000375	6	6	0.83447	0	0	22	24.745	18	4.25017	0	0	0	0	375	155.486	0	0	0	0	0	0	10	34.5629	0	0	0	0	0	0	4	2.59765	28	39.6007	255	227.065	233	962.708	9	1.40819	32	11.8719	0	0	17
CARD_100829_TM_#03	antibiotic target modifying enzyme; ErmC	erythromycin, roxithromycin, lincomycin, telithromycin, clarithromycin, clindamycin, tylosin, spiramycin, azithromycin, dirithromycin, pristinamycin IA, quinupristin, pristinamycin IIA, madumycin II, griseoviridin, dalfopristin, pristinamycin IB, virginiamycin S2, vernamycin B-gamma, vernamycin C, patricin A, patricin B, ostreogrycin B3, oleandomycin, macrolide antibiotic, lincosamide antibiotic,…	0000006, 0000027, 0000046, 0000057, 0000065, 0000066, 3000145, 3000156, 3000158, 3000176, 3000583, 3000584, 3000669, 3000672, 3000673, 3000674, 3000675, 3000677, 3000678, 3000679, 3000680, 3000681, 3000682, 3000867, 0000000, 0000017, 0000026	3000519	3000250	6	0	0	0	0	0	0	0	0	0	0	0	0	2	0.907188	0	0	0	0	0	0	0	0	0	0	0	0	0	0	0	0	0	0	0	0	0	0	0	0	0	0	0	0	0
CARD_100829_TM_#02	antibiotic target modifying enzyme; ErmC	erythromycin, roxithromycin, lincomycin, telithromycin, clarithromycin, clindamycin, tylosin, spiramycin, azithromycin, dirithromycin, pristinamycin IA, quinupristin, pristinamycin IIA, madumycin II, griseoviridin, dalfopristin, pristinamycin IB, virginiamycin S2, vernamycin B-gamma, vernamycin C, patricin A, patricin B, ostreogrycin B3, oleandomycin, macrolide antibiotic, lincosamide antibiotic,…	0000006, 0000027, 0000046, 0000057, 0000065, 0000066, 3000145, 3000156, 3000158, 3000176, 3000583, 3000584, 3000669, 3000672, 3000673, 3000674, 3000675, 3000677, 3000678, 3000679, 3000680, 3000681, 3000682, 3000867, 0000000, 0000017, 0000026	3000519	3000250	6	0	0	0	0	0	0	0	0	0	0	0	0	0	0	0	0	0	0	0	0	0	0	0	0	0	0	0	0	0	0	1	1.24119	0	0	0	0	0	0	0	0	6	1.39708	0
CARD_100829_TM_#06	antibiotic target modifying enzyme; ErmC	erythromycin, roxithromycin, lincomycin, telithromycin, clarithromycin, clindamycin, tylosin, spiramycin, azithromycin, dirithromycin, pristinamycin IA, quinupristin, pristinamycin IIA, madumycin II, griseoviridin, dalfopristin, pristinamycin IB, virginiamycin S2, vernamycin B-gamma, vernamycin C, patricin A, patricin B, ostreogrycin B3, oleandomycin, macrolide antibiotic, lincosamide antibiotic,…	0000006, 0000027, 0000046, 0000057, 0000065, 0000066, 3000145, 3000156, 3000158, 3000176, 3000583, 3000584, 3000669, 3000672, 3000673, 3000674, 3000675, 3000677, 3000678, 3000679, 3000680, 3000681, 3000682, 3000867, 0000000, 0000017, 0000026	3000519	3000250	6	0	0	0	0	0	0	0	0	0	0	0	0	0	0	0	0	0	0	0	0	0	0	0	0	0	0	0	0	0	0	0	0	0	0	0	0	0	0	0	0	0	0	1
CARD_100829_TM_#09	antibiotic target modifying enzyme; ErmC	erythromycin, roxithromycin, lincomycin, telithromycin, clarithromycin, clindamycin, tylosin, spiramycin, azithromycin, dirithromycin, pristinamycin IA, quinupristin, pristinamycin IIA, madumycin II, griseoviridin, dalfopristin, pristinamycin IB, virginiamycin S2, vernamycin B-gamma, vernamycin C, patricin A, patricin B, ostreogrycin B3, oleandomycin, macrolide antibiotic, lincosamide antibiotic,…	0000006, 0000027, 0000046, 0000057, 0000065, 0000066, 3000145, 3000156, 3000158, 3000176, 3000583, 3000584, 3000669, 3000672, 3000673, 3000674, 3000675, 3000677, 3000678, 3000679, 3000680, 3000681, 3000682, 3000867, 0000000, 0000017, 0000026	3000519	3000250	6	0	0	0	0	0	0	0	0	0	0	0	0	0	0	0	0	0	0	0	0	0	0	0	0	0	0	0	0	0	0	0	0	0	0	0	0	0	0	0	0	0	0	0
RESF_302481_TM_#01	antibiotic target modifying enzyme; ErmF	erythromycin, roxithromycin, lincomycin, telithromycin, clarithromycin, clindamycin, tylosin, spiramycin, azithromycin, dirithromycin, pristinamycin IA, quinupristin, pristinamycin IIA, madumycin II, griseoviridin, dalfopristin, pristinamycin IB, virginiamycin S2, vernamycin B-gamma, vernamycin C, patricin A, patricin B, ostreogrycin B3, oleandomycin, macrolide antibiotic, lincosamide antibiotic,…	0000006, 0000027, 0000046, 0000057, 0000065, 0000066, 3000145, 3000156, 3000158, 3000176, 3000583, 3000584, 3000669, 3000672, 3000673, 3000674, 3000675, 3000677, 3000678, 3000679, 3000680, 3000681, 3000682, 3000867, 0000000, 0000017, 0000026	3000519	3000498	6	0	0	0	0	2	0.843769	0	0	0	0	0	0	65	10.7977	0	0	0	0	0	0	0	0	0	0	0	0	18	10.9013	0	0	325	185.559	4	1.33997	0	0	8	0.327943	0	0	0	0	6
RESF_302481_TM_#03	antibiotic target modifying enzyme; ErmF	erythromycin, roxithromycin, lincomycin, telithromycin, clarithromycin, clindamycin, tylosin, spiramycin, azithromycin, dirithromycin, pristinamycin IA, quinupristin, pristinamycin IIA, madumycin II, griseoviridin, dalfopristin, pristinamycin IB, virginiamycin S2, vernamycin B-gamma, vernamycin C, patricin A, patricin B, ostreogrycin B3, oleandomycin, macrolide antibiotic, lincosamide antibiotic,…	0000006, 0000027, 0000046, 0000057, 0000065, 0000066, 3000145, 3000156, 3000158, 3000176, 3000583, 3000584, 3000669, 3000672, 3000673, 3000674, 3000675, 3000677, 3000678, 3000679, 3000680, 3000681, 3000682, 3000867, 0000000, 0000017, 0000026	3000519	3000498	6	0	0	0	0	0	0	0	0	0	0	0	0	23	11.5219	0	0	0	0	0	0	0	0	0	0	0	0	0	0	0	0	62	88.0781	0	0	0	0	2	0.184614	0	0	0	0	0
RESF_302481_TM_#04	antibiotic target modifying enzyme; ErmF	erythromycin, roxithromycin, lincomycin, telithromycin, clarithromycin, clindamycin, tylosin, spiramycin, azithromycin, dirithromycin, pristinamycin IA, quinupristin, pristinamycin IIA, madumycin II, griseoviridin, dalfopristin, pristinamycin IB, virginiamycin S2, vernamycin B-gamma, vernamycin C, patricin A, patricin B, ostreogrycin B3, oleandomycin, macrolide antibiotic, lincosamide antibiotic,…	0000006, 0000027, 0000046, 0000057, 0000065, 0000066, 3000145, 3000156, 3000158, 3000176, 3000583, 3000584, 3000669, 3000672, 3000673, 3000674, 3000675, 3000677, 3000678, 3000679, 3000680, 3000681, 3000682, 3000867, 0000000, 0000017, 0000026	3000519	3000498	6	0	0	0	0	0	0	0	0	0	0	0	0	3	3.61937	0	0	0	0	0	0	0	0	0	0	0	0	0	0	0	0	14	54.0005	0	0	0	0	0	0	0	0	0	0	0
RESF_302481_TM_#06	antibiotic target modifying enzyme; ErmF	erythromycin, roxithromycin, lincomycin, telithromycin, clarithromycin, clindamycin, tylosin, spiramycin, azithromycin, dirithromycin, pristinamycin IA, quinupristin, pristinamycin IIA, madumycin II, griseoviridin, dalfopristin, pristinamycin IB, virginiamycin S2, vernamycin B-gamma, vernamycin C, patricin A, patricin B, ostreogrycin B3, oleandomycin, macrolide antibiotic, lincosamide antibiotic,…	0000006, 0000027, 0000046, 0000057, 0000065, 0000066, 3000145, 3000156, 3000158, 3000176, 3000583, 3000584, 3000669, 3000672, 3000673, 3000674, 3000675, 3000677, 3000678, 3000679, 3000680, 3000681, 3000682, 3000867, 0000000, 0000017, 0000026	3000519	3000498	6	0	0	0	0	0	0	0	0	0	0	0	0	1	0.436794	0	0	0	0	0	0	0	0	0	0	0	0	0	0	0	0	53	82.4472	0	0	0	0	5	0.623033	0	0	0	0	0
RESF_302481_TM_#07	antibiotic target modifying enzyme; ErmF	erythromycin, roxithromycin, lincomycin, telithromycin, clarithromycin, clindamycin, tylosin, spiramycin, azithromycin, dirithromycin, pristinamycin IA, quinupristin, pristinamycin IIA, madumycin II, griseoviridin, dalfopristin, pristinamycin IB, virginiamycin S2, vernamycin B-gamma, vernamycin C, patricin A, patricin B, ostreogrycin B3, oleandomycin, macrolide antibiotic, lincosamide antibiotic,…	0000006, 0000027, 0000046, 0000057, 0000065, 0000066, 3000145, 3000156, 3000158, 3000176, 3000583, 3000584, 3000669, 3000672, 3000673, 3000674, 3000675, 3000677, 3000678, 3000679, 3000680, 3000681, 3000682, 3000867, 0000000, 0000017, 0000026	3000519	3000498	6	0	0	0	0	0	0	0	0	0	0	0	0	5	5.93501	0	0	0	0	0	0	0	0	0	0	0	0	0	0	0	0	28	136.502	0	0	0	0	0	0	0	0	0	0	0
CARD_100934_TM_#01	antibiotic target modifying enzyme; ErmG	erythromycin, roxithromycin, lincomycin, telithromycin, clarithromycin, clindamycin, tylosin, spiramycin, azithromycin, dirithromycin, pristinamycin IA, quinupristin, pristinamycin IIA, madumycin II, griseoviridin, dalfopristin, pristinamycin IB, virginiamycin S2, vernamycin B-gamma, vernamycin C, patricin A, patricin B, ostreogrycin B3, oleandomycin, macrolide antibiotic, lincosamide antibiotic,…	0000006, 0000027, 0000046, 0000057, 0000065, 0000066, 3000145, 3000156, 3000158, 3000176, 3000583, 3000584, 3000669, 3000672, 3000673, 3000674, 3000675, 3000677, 3000678, 3000679, 3000680, 3000681, 3000682, 3000867, 0000000, 0000017, 0000026	3000519	3000522	6	0	0	0	0	0	0	56	5.34437	0	0	13	1.61858	8827	1319.42	0	0	0	0	2	0.314399	0	0	0	0	43	5.45787	0	0	0	0	0	0	0	0	8	11.5578	0	0	0	0	0	0	0
CARD_100934_TM_#03	antibiotic target modifying enzyme; ErmG	erythromycin, roxithromycin, lincomycin, telithromycin, clarithromycin, clindamycin, tylosin, spiramycin, azithromycin, dirithromycin, pristinamycin IA, quinupristin, pristinamycin IIA, madumycin II, griseoviridin, dalfopristin, pristinamycin IB, virginiamycin S2, vernamycin B-gamma, vernamycin C, patricin A, patricin B, ostreogrycin B3, oleandomycin, macrolide antibiotic, lincosamide antibiotic,…	0000006, 0000027, 0000046, 0000057, 0000065, 0000066, 3000145, 3000156, 3000158, 3000176, 3000583, 3000584, 3000669, 3000672, 3000673, 3000674, 3000675, 3000677, 3000678, 3000679, 3000680, 3000681, 3000682, 3000867, 0000000, 0000017, 0000026	3000519	3000522	6	0	0	0	0	0	0	16	9.06271	0	0	2	1.57447	1167	1382.51	0	0	0	0	2	1.81384	0	0	0	0	0	0	0	0	0	0	0	0	0	0	1	8.76406	0	0	0	0	0	0	0
CARD_100934_TM_#04	antibiotic target modifying enzyme; ErmG	erythromycin, roxithromycin, lincomycin, telithromycin, clarithromycin, clindamycin, tylosin, spiramycin, azithromycin, dirithromycin, pristinamycin IA, quinupristin, pristinamycin IIA, madumycin II, griseoviridin, dalfopristin, pristinamycin IB, virginiamycin S2, vernamycin B-gamma, vernamycin C, patricin A, patricin B, ostreogrycin B3, oleandomycin, macrolide antibiotic, lincosamide antibiotic,…	0000006, 0000027, 0000046, 0000057, 0000065, 0000066, 3000145, 3000156, 3000158, 3000176, 3000583, 3000584, 3000669, 3000672, 3000673, 3000674, 3000675, 3000677, 3000678, 3000679, 3000680, 3000681, 3000682, 3000867, 0000000, 0000017, 0000026	3000519	3000522	6	0	0	0	0	0	0	3	3.21874	0	0	0	0	653	1043.65	0	0	0	0	0	0	0	0	0	0	0	0	0	0	0	0	2	15.3908	0	0	0	0	0	0	0	0	0	0	0
CARD_100934_TM_#05	antibiotic target modifying enzyme; ErmG	erythromycin, roxithromycin, lincomycin, telithromycin, clarithromycin, clindamycin, tylosin, spiramycin, azithromycin, dirithromycin, pristinamycin IA, quinupristin, pristinamycin IIA, madumycin II, griseoviridin, dalfopristin, pristinamycin IB, virginiamycin S2, vernamycin B-gamma, vernamycin C, patricin A, patricin B, ostreogrycin B3, oleandomycin, macrolide antibiotic, lincosamide antibiotic,…	0000006, 0000027, 0000046, 0000057, 0000065, 0000066, 3000145, 3000156, 3000158, 3000176, 3000583, 3000584, 3000669, 3000672, 3000673, 3000674, 3000675, 3000677, 3000678, 3000679, 3000680, 3000681, 3000682, 3000867, 0000000, 0000017, 0000026	3000519	3000522	6	0	0	0	0	0	0	14	4.41071	0	0	5	3.49664	1956	1242.37	0	0	0	0	3	1.47375	0	0	0	0	0	0	0	0	0	0	0	0	0	0	3	14.2416	0	0	0	0	0	0	0
CARD_102111_TM_#05	antibiotic target modifying enzyme; ErmO-srmA	macrolide antibiotic, lincosamide antibiotic, streptogramin antibiotic	0000000, 0000017, 0000026	3000519	3001303	6	0	0	0	0	0	0	8	2.01802	0	0	2	0.705798	0	0	0	0	0	0	13	5.31927	0	0	0	0	0	0	0	0	0	0	0	0	0	0	0	0	0	0	2	0.582134	0	0	0
CARD_102111_TM_#01	antibiotic target modifying enzyme; ErmO-srmA	macrolide antibiotic, lincosamide antibiotic, streptogramin antibiotic	0000000, 0000017, 0000026	3000519	3001303	6	0	0	0	0	0	0	0	0	0	0	13	4.44252	0	0	0	0	0	0	0	0	0	0	0	0	0	0	0	0	0	0	0	0	0	0	0	0	0	0	1	0.281365	0	0	0
CARD_100283_TM_#01	antibiotic target modifying enzyme; ErmQ	erythromycin, roxithromycin, lincomycin, telithromycin, clarithromycin, clindamycin, tylosin, spiramycin, azithromycin, dirithromycin, pristinamycin IA, quinupristin, pristinamycin IIA, madumycin II, griseoviridin, dalfopristin, pristinamycin IB, virginiamycin S2, vernamycin B-gamma, vernamycin C, patricin A, patricin B, ostreogrycin B3, oleandomycin, macrolide antibiotic, lincosamide antibiotic,…	0000006, 0000027, 0000046, 0000057, 0000065, 0000066, 3000145, 3000156, 3000158, 3000176, 3000583, 3000584, 3000669, 3000672, 3000673, 3000674, 3000675, 3000677, 3000678, 3000679, 3000680, 3000681, 3000682, 3000867, 0000000, 0000017, 0000026	3000519	3000593	6	2	0.0406738	0	0	6	0.7592	66	2.23036	0	0	17	0.792237	99	5.36519	3	0.102006	2	0.0819799	2012	109.049	47	18.2727	8	3.76967	130	6.11861	39	8.49878	8	0.732081	18	3.22188	6	0.675051	0	0	51	0.638175	8	0.303585	9	0.2944	197
RESF_302493_TM_#01	antibiotic target modifying enzyme; ErmT	erythromycin, roxithromycin, lincomycin, telithromycin, clarithromycin, clindamycin, tylosin, spiramycin, azithromycin, dirithromycin, pristinamycin IA, quinupristin, pristinamycin IIA, madumycin II, griseoviridin, dalfopristin, pristinamycin IB, virginiamycin S2, vernamycin B-gamma, vernamycin C, patricin A, patricin B, ostreogrycin B3, oleandomycin, macrolide antibiotic, lincosamide antibiotic,…	0000006, 0000027, 0000046, 0000057, 0000065, 0000066, 3000145, 3000156, 3000158, 3000176, 3000583, 3000584, 3000669, 3000672, 3000673, 3000674, 3000675, 3000677, 3000678, 3000679, 3000680, 3000681, 3000682, 3000867, 0000000, 0000017, 0000026	3000519	3000595	6	11	0.237128	2	0.867259	43	5.89804	20	0.715106	0	0	20	1.00766	780	45.0774	0	0	0	0	2	0.108831	22	9.16956	48	23.9726	3	0.153676	0	0	14	1.39779	26	4.99789	605	73.7102	574	322.973	7	0.0890623	76	3.14445	0	0	34
CARD_101199_TM_#03	antibiotic target modifying enzyme; ErmT	erythromycin, roxithromycin, lincomycin, telithromycin, clarithromycin, clindamycin, tylosin, spiramycin, azithromycin, dirithromycin, pristinamycin IA, quinupristin, pristinamycin IIA, madumycin II, griseoviridin, dalfopristin, pristinamycin IB, virginiamycin S2, vernamycin B-gamma, vernamycin C, patricin A, patricin B, ostreogrycin B3, oleandomycin, macrolide antibiotic, lincosamide antibiotic,…	0000006, 0000027, 0000046, 0000057, 0000065, 0000066, 3000145, 3000156, 3000158, 3000176, 3000583, 3000584, 3000669, 3000672, 3000673, 3000674, 3000675, 3000677, 3000678, 3000679, 3000680, 3000681, 3000682, 3000867, 0000000, 0000017, 0000026	3000519	3000595	6	0	0	0	0	0	0	0	0	0	0	0	0	0	0	6	0.686978	0	0	2	0.311629	27	35.5289	0	0	0	0	0	0	2	0.680584	0	0	0	0	0	0	0	0	0	0	0	0	0
CARD_101119_TM_#01	antibiotic target modifying enzyme; ErmV	macrolide antibiotic, lincosamide antibiotic, streptogramin antibiotic	0000000, 0000017, 0000026	3000519	3002824	6	0	0	0	0	0	0	0	0	15	0.772424	0	0	8	0.440191	0	0	0	0	0	0	0	0	0	0	0	0	0	0	0	0	0	0	0	0	0	0	0	0	6	0.236662	0	0	0
RESF_302498_TM_#05	antibiotic target modifying enzyme; ErmX	erythromycin, roxithromycin, lincomycin, telithromycin, clarithromycin, clindamycin, tylosin, spiramycin, azithromycin, dirithromycin, pristinamycin IA, quinupristin, pristinamycin IIA, madumycin II, griseoviridin, dalfopristin, pristinamycin IB, virginiamycin S2, vernamycin B-gamma, vernamycin C, patricin A, patricin B, ostreogrycin B3, oleandomycin, macrolide antibiotic, lincosamide antibiotic,…	0000006, 0000027, 0000046, 0000057, 0000065, 0000066, 3000145, 3000156, 3000158, 3000176, 3000583, 3000584, 3000669, 3000672, 3000673, 3000674, 3000675, 3000677, 3000678, 3000679, 3000680, 3000681, 3000682, 3000867, 0000000, 0000017, 0000026	3000519	3000596	6	5	0.701536	37	176.995	0	0	1	0.228604	1	0.351933	0	0	0	0	0	0	0	0	0	0	0	0	0	0	0	0	9	13.0897	0	0	6	7.21445	0	0	0	0	0	0	0	0	20	4.5114	0
RESF_302498_TM_#06	antibiotic target modifying enzyme; ErmX	erythromycin, roxithromycin, lincomycin, telithromycin, clarithromycin, clindamycin, tylosin, spiramycin, azithromycin, dirithromycin, pristinamycin IA, quinupristin, pristinamycin IIA, madumycin II, griseoviridin, dalfopristin, pristinamycin IB, virginiamycin S2, vernamycin B-gamma, vernamycin C, patricin A, patricin B, ostreogrycin B3, oleandomycin, macrolide antibiotic, lincosamide antibiotic,…	0000006, 0000027, 0000046, 0000057, 0000065, 0000066, 3000145, 3000156, 3000158, 3000176, 3000583, 3000584, 3000669, 3000672, 3000673, 3000674, 3000675, 3000677, 3000678, 3000679, 3000680, 3000681, 3000682, 3000867, 0000000, 0000017, 0000026	3000519	3000596	6	4	0.892019	0	0	0	0	0	0	0	0	0	0	2	5.89672	0	0	0	0	3	9.43198	0	0	0	0	429	470.528	5	58.0392	0	0	0	0	0	0	0	0	0	0	0	0	0	0	0
RESF_302498_TM_#01	antibiotic target modifying enzyme; ErmX	erythromycin, roxithromycin, lincomycin, telithromycin, clarithromycin, clindamycin, tylosin, spiramycin, azithromycin, dirithromycin, pristinamycin IA, quinupristin, pristinamycin IIA, madumycin II, griseoviridin, dalfopristin, pristinamycin IB, virginiamycin S2, vernamycin B-gamma, vernamycin C, patricin A, patricin B, ostreogrycin B3, oleandomycin, macrolide antibiotic, lincosamide antibiotic,…	0000006, 0000027, 0000046, 0000057, 0000065, 0000066, 3000145, 3000156, 3000158, 3000176, 3000583, 3000584, 3000669, 3000672, 3000673, 3000674, 3000675, 3000677, 3000678, 3000679, 3000680, 3000681, 3000682, 3000867, 0000000, 0000017, 0000026	3000519	3000596	6	0	0	0	0	0	0	6	1.62563	0	0	0	0	0	0	0	0	0	0	2	0.873332	0	0	0	0	130	49.3802	0	0	0	0	0	0	0	0	0	0	6	0.608543	1	0.312628	22	5.88488	6
RESF_302498_TM_#04	antibiotic target modifying enzyme; ErmX	erythromycin, roxithromycin, lincomycin, telithromycin, clarithromycin, clindamycin, tylosin, spiramycin, azithromycin, dirithromycin, pristinamycin IA, quinupristin, pristinamycin IIA, madumycin II, griseoviridin, dalfopristin, pristinamycin IB, virginiamycin S2, vernamycin B-gamma, vernamycin C, patricin A, patricin B, ostreogrycin B3, oleandomycin, macrolide antibiotic, lincosamide antibiotic,…	0000006, 0000027, 0000046, 0000057, 0000065, 0000066, 3000145, 3000156, 3000158, 3000176, 3000583, 3000584, 3000669, 3000672, 3000673, 3000674, 3000675, 3000677, 3000678, 3000679, 3000680, 3000681, 3000682, 3000867, 0000000, 0000017, 0000026	3000519	3000596	6	0	0	0	0	0	0	0	0	0	0	0	0	0	0	0	0	0	0	0	0	0	0	15	295.943	0	0	0	0	3	12.0463	0	0	0	0	0	0	0	0	0	0	0	0	0
CARD_101694_TM_#01	antibiotic target modifying enzyme; ErmY	macrolide antibiotic, lincosamide antibiotic, streptogramin antibiotic	0000000, 0000017, 0000026	3000519	3002825	6	0	0	0	0	0	0	2	0.0735208	0	0	0	0	0	0	0	0	0	0	0	0	0	0	0	0	0	0	0	0	0	0	0	0	0	0	0	0	0	0	0	0	0	0	0
CARD_102307_TM_#05	antibiotic target modifying enzyme; kamB	neomycin, apramycin, kanamycin A, aminoglycoside antibiotic	0000005, 0000037, 0000049, 0000016	3000519	3004102	6	0	0	0	0	0	0	0	0	0	0	1	0.310123	0	0	0	0	0	0	0	0	0	0	0	0	0	0	0	0	0	0	0	0	0	0	0	0	0	0	0	0	0	0	0
CARD_102157_TM_#01	antibiotic target modifying enzyme; LlmA 23S ribosomal RNA methyltransferase	clindamycin, lincosamide antibiotic	0000066, 0000017	3000519	3003982	6	0	0	0	0	0	0	0	0	0	0	3	0.12681	4	0.194933	0	0	4	0.136877	10	0.480618	0	0	0	0	0	0	0	0	0	0	7	1.04225	0	0	0	0	8	0.0870838	2	0.0650137	0	0	31
RESF_300024_TM_#02	antibiotic target modifying enzyme; sgm	dibekacin, amikacin, gentamicin C, sisomicin, netilmicin, kanamycin A, tobramycin, isepamicin, G418, arbekacin, gentamicin B, aminoglycoside antibiotic	0000007, 0000013, 0000014, 0000035, 0000038, 0000049, 0000052, 3000652, 3000653, 3000654, 3000655, 0000016	3000519	3000862	6	0	0	0	0	0	0	2	0.60961	0	0	0	0	7	3.43975	0	0	0	0	0	0	0	0	0	0	0	0	0	0	0	0	0	0	0	0	0	0	4	1.06004	0	0	0	0	0
RESF_300024_TM_#01	antibiotic target modifying enzyme; sgm	dibekacin, amikacin, gentamicin C, sisomicin, netilmicin, kanamycin A, tobramycin, isepamicin, G418, arbekacin, gentamicin B, aminoglycoside antibiotic	0000007, 0000013, 0000014, 0000035, 0000038, 0000049, 0000052, 3000652, 3000653, 3000654, 3000655, 0000016	3000519	3000862	6	0	0	0	0	0	0	0	0	0	0	0	0	2	0.982787	0	0	0	0	0	0	0	0	0	0	0	0	0	0	0	0	0	0	0	0	0	0	0	0	0	0	0	0	0
RESF_300024_TM_#07	antibiotic target modifying enzyme; sgm	dibekacin, amikacin, gentamicin C, sisomicin, netilmicin, kanamycin A, tobramycin, isepamicin, G418, arbekacin, gentamicin B, aminoglycoside antibiotic	0000007, 0000013, 0000014, 0000035, 0000038, 0000049, 0000052, 3000652, 3000653, 3000654, 3000655, 0000016	3000519	3000862	6	0	0	0	0	0	0	0	0	0	0	0	0	8	4.49274	0	0	0	0	0	0	0	0	0	0	0	0	15	33.2366	0	0	0	0	4	10.2577	0	0	0	0	0	0	0	0	0
RESF_302523_TM_#01	antibiotic target protection protein; carA	macrolide antibiotic, lincosamide antibiotic, streptogramin antibiotic, tetracycline antibiotic, oxazolidinone antibiotic, phenicol antibiotic, pleuromutilin antibiotic	0000000, 0000017, 0000026, 3000050, 3000079, 3000387, 3000670	3000185	3002817	4	0	0	0	0	0	0	0	0	0	0	0	0	0	0	4	0.11734	0	0	8	0.366302	0	0	0	0	0	0	0	0	0	0	0	0	0	0	0	0	0	0	2	0.0661603	0	0	0
CARD_102032_TM_#01	antibiotic target protection protein; fusC	fusidic acid	3000759	3000185	3003733	4	0	0	0	0	0	0	0	0	0	0	0	0	1	0.0706194	0	0	0	0	0	0	0	0	6	3.54661	0	0	0	0	0	0	0	0	0	0	0	0	0	0	2	0.0979607	0	0	0
CARD_102716_TM_#01	antibiotic target protection protein; lsa(D)	antibiotic molecule	1000003	3000185	3005121	5	4	0.0676302	0	0	0	0	241	6.85155	248	10.8626	58	2.32063	5835	266.927	1	0.029335	0	0	0	0	45	14.7746	0	0	440	17.6457	23	4.16784	5	0.393671	0	0	0	0	158	69.5264	12	0.124887	2	0.0656032	4	0.112201	0
NCBI_204857_TM_#02	antibiotic target protection protein; lsaA	clindamycin, quinupristin, dalfopristin, pleuromutilin	0000066, 3000584, 3000674, 3001317	3000185	3000300	5	0	0	0	0	1	0.898205	0	0	152	50.3896	29	8.55633	6314	2147.95	0	0	0	0	0	0	98	253.33	0	0	0	0	0	0	0	0	0	0	0	0	20	71.9581	28	2.38687	0	0	47	10.4928	4
NCBI_204857_TM_#03	antibiotic target protection protein; lsaA	clindamycin, quinupristin, dalfopristin, pleuromutilin	0000066, 3000584, 3000674, 3001317	3000185	3000300	5	0	0	0	0	0	0	0	0	10	10.4529	0	0	956	1215.23	0	0	0	0	0	0	12	172.507	0	0	0	0	0	0	0	0	0	0	0	0	0	0	1	0.256729	0	0	2	1.39708	0
NCBI_204857_TM_#04	antibiotic target protection protein; lsaA	clindamycin, quinupristin, dalfopristin, pleuromutilin	0000066, 3000584, 3000674, 3001317	3000185	3000300	5	0	0	0	0	0	0	0	0	51	28.9645	6	2.74459	2808	1665.58	0	0	0	0	0	0	69	301.957	0	0	0	0	0	0	0	0	0	0	0	0	11	44.8631	52	7.33123	0	0	7	3.15798	0
NCBI_204857_TM_#05	antibiotic target protection protein; lsaA	clindamycin, quinupristin, dalfopristin, pleuromutilin	0000066, 3000584, 3000674, 3001317	3000185	3000300	5	0	0	0	0	0	0	0	0	109	48.7367	4	1.42671	5009	2057.85	0	0	0	0	0	0	81	273.712	0	0	0	0	0	0	0	0	0	0	0	0	14	59.871	73	7.01062	0	0	80	24.0567	0
NCBI_204857_TM_#06	antibiotic target protection protein; lsaA	clindamycin, quinupristin, dalfopristin, pleuromutilin	0000066, 3000584, 3000674, 3001317	3000185	3000300	5	0	0	0	0	0	0	0	0	30	21.1743	2	1.07727	2191	1680.59	0	0	0	0	0	0	42	185.912	0	0	0	0	0	0	0	0	0	0	0	0	6	35.9788	16	2.30863	0	0	7	2.70835	0
CARD_101095_TM_#01	antibiotic target protection protein; lsaB	clindamycin, pleuromutilin, macrolide antibiotic, lincosamide antibiotic, streptogramin antibiotic, tetracycline antibiotic, oxazolidinone antibiotic, phenicol antibiotic, pleuromutilin antibiotic	0000066, 3001317, 0000000, 0000017, 0000026, 3000050, 3000079, 3000387, 3000670	3000185	3003111	5	0	0	0	0	0	0	2	0.0554892	0	0	2	0.0788247	0	0	0	0	0	0	5	0.226694	0	0	0	0	9	0.361225	0	0	0	0	183	27.4461	0	0	0	0	7	0.0730817	0	0	0	0	0
NCBI_200357_TM_#01	antibiotic target protection protein; mel	erythromycin, telithromycin	0000006, 0000057	3000185	3000616	5	104	42.6232	1	7.22716	425	1170.77	526	439.774	1	0.938488	1895	2185.3	3134	3913.62	43	33.9272	3	2.58627	784	1060.42	51	415.5	35	291.602	834	821.507	2378	10627.6	13	21.7503	39	126.491	738	1770.57	53	699.876	31	7.62201	228	207.793	0	0	164
NCBI_200357_TM_#02	antibiotic target protection protein; mel	erythromycin, telithromycin	0000006, 0000057	3000185	3000616	5	252	57.0869	50	197.226	1470	2148.26	1195	520.479	6	3.07142	4623	2803.63	5633	4062.49	118	44.8875	6	2.36996	1526	1095.75	221	1141.2	232	1054.22	1142	770.369	6398	17598.1	31	47.1103	329	641.858	1157	1666.46	189	1097.9	56	8.2669	599	295.132	0	0	107
NCBI_200357_TM_#03	antibiotic target protection protein; mel	erythromycin, telithromycin	0000006, 0000057	3000185	3000616	5	316	71.1668	69	285.379	1228	1601.3	1324	534.391	26	12.7452	5557	2876.39	6096	3807.53	110	36.814	10	3.7782	1215	731.324	125	685.858	154	713.65	3529	1896.09	7036	18005.2	55	50.0812	311	555.724	1318	1740.34	217	1244.82	77	11.3329	626	272.275	6	1.88302	318
NCBI_200375_TM_#02	antibiotic target protection protein; msrA	erythromycin, quinupristin	0000006, 3000584	3000185	3000251	5	0	0	0	0	4	6.55162	0	0	0	0	0	0	1	0.693732	0	0	0	0	0	0	0	0	0	0	0	0	0	0	0	0	0	0	0	0	0	0	0	0	0	0	0	0	0
NCBI_200375_TM_#06	antibiotic target protection protein; msrA	erythromycin, quinupristin	0000006, 3000584	3000185	3000251	5	0	0	0	0	0	0	0	0	8	9.65302	0	0	0	0	0	0	0	0	0	0	0	0	0	0	0	0	0	0	0	0	0	0	0	0	0	0	0	0	0	0	0	0	0
NCBI_200375_TM_#07	antibiotic target protection protein; msrA	erythromycin, quinupristin	0000006, 3000584	3000185	3000251	5	0	0	0	0	0	0	0	0	0	0	0	0	0	0	0	0	0	0	0	0	0	0	6	21.4063	0	0	0	0	0	0	0	0	0	0	0	0	0	0	0	0	0	0	0
RESF_302518_TM_#03	antibiotic target protection protein; msrC	erythromycin, quinupristin	0000006, 3000584	3000185	3002819	5	0	0	0	0	0	0	2	1.18627	0	0	0	0	1	0.73709	0	0	0	0	0	0	0	0	0	0	0	0	0	0	0	0	0	0	0	0	0	0	0	0	0	0	0	0	0
RESF_302518_TM_#02	antibiotic target protection protein; msrC	erythromycin, quinupristin	0000006, 3000584	3000185	3002819	5	0	0	0	0	0	0	0	0	0	0	0	0	7	4.12771	0	0	0	0	0	0	0	0	0	0	0	0	0	0	0	0	0	0	0	0	0	0	0	0	0	0	0	0	0
RESF_302518_TM_#04	antibiotic target protection protein; msrC	erythromycin, quinupristin	0000006, 3000584	3000185	3002819	5	0	0	0	0	0	0	0	0	0	0	0	0	17	23.064	0	0	0	0	0	0	0	0	0	0	0	0	0	0	0	0	0	0	0	0	0	0	0	0	0	0	0	0	0
RESF_302518_TM_#10	antibiotic target protection protein; msrC	erythromycin, quinupristin	0000006, 3000584	3000185	3002819	5	0	0	0	0	0	0	0	0	0	0	0	0	18	23.5869	1	0.440025	0	0	0	0	0	0	0	0	0	0	0	0	0	0	0	0	0	0	0	0	0	0	0	0	0	0	0
CARD_100028_TM_#01	antibiotic target protection protein; msrE	erythromycin, macrolide antibiotic, lincosamide antibiotic, streptogramin antibiotic, tetracycline antibiotic, oxazolidinone antibiotic, phenicol antibiotic, pleuromutilin antibiotic	0000006, 0000000, 0000017, 0000026, 3000050, 3000079, 3000387, 3000670	3000185	3003109	5	6	0.096886	2545	857.08	49	5.25122	25	0.70539	0	0	53614	2118.83	1208	54.8426	42	1.22151	2	0.0681558	83969	3827.72	4	1.31883	29	11.3477	28	1.12474	22580	4053.7	0	0	104637	15639	153	14.6659	32	14.1956	487	5.13625	9378	305.832	5	0.14146	1580
RESF_302647_TM_#02	antibiotic target protection protein; optrA	macrolide antibiotic, lincosamide antibiotic, streptogramin antibiotic, tetracycline antibiotic, oxazolidinone antibiotic, phenicol antibiotic, pleuromutilin antibiotic	0000000, 0000017, 0000026, 3000050, 3000079, 3000387, 3000670	3000185	3003746	4	0	0	0	0	2665	3659.06	1	0.318058	0	0	1	0.529348	0	0	0	0	0	0	0	0	0	0	0	0	0	0	0	0	0	0	16	26.7666	0	0	80	457.668	0	0	0	0	0	0	0
RESF_302647_TM_#03	antibiotic target protection protein; optrA	macrolide antibiotic, lincosamide antibiotic, streptogramin antibiotic, tetracycline antibiotic, oxazolidinone antibiotic, phenicol antibiotic, pleuromutilin antibiotic	0000000, 0000017, 0000026, 3000050, 3000079, 3000387, 3000670	3000185	3003746	4	0	0	0	0	1682	2313.33	6	1.6058	0	0	0	0	0	0	0	0	0	0	0	0	0	0	0	0	0	0	0	0	0	0	0	0	0	0	40	194.539	0	0	0	0	0	0	0
RESF_302647_TM_#06	antibiotic target protection protein; optrA	macrolide antibiotic, lincosamide antibiotic, streptogramin antibiotic, tetracycline antibiotic, oxazolidinone antibiotic, phenicol antibiotic, pleuromutilin antibiotic	0000000, 0000017, 0000026, 3000050, 3000079, 3000387, 3000670	3000185	3003746	4	0	0	0	0	633	1894.69	0	0	0	0	0	0	0	0	0	0	0	0	0	0	0	0	0	0	0	0	0	0	0	0	0	0	0	0	36	480.561	0	0	0	0	0	0	0
RESF_302647_TM_#07	antibiotic target protection protein; optrA	macrolide antibiotic, lincosamide antibiotic, streptogramin antibiotic, tetracycline antibiotic, oxazolidinone antibiotic, phenicol antibiotic, pleuromutilin antibiotic	0000000, 0000017, 0000026, 3000050, 3000079, 3000387, 3000670	3000185	3003746	4	0	0	0	0	1697	1759.3	0	0	0	0	0	0	0	0	0	0	0	0	0	0	0	0	0	0	0	0	0	0	0	0	0	0	0	0	54	228.971	0	0	0	0	0	0	0
RESF_302647_TM_#09	antibiotic target protection protein; optrA	macrolide antibiotic, lincosamide antibiotic, streptogramin antibiotic, tetracycline antibiotic, oxazolidinone antibiotic, phenicol antibiotic, pleuromutilin antibiotic	0000000, 0000017, 0000026, 3000050, 3000079, 3000387, 3000670	3000185	3003746	4	0	0	0	0	23	26.7746	0	0	0	0	0	0	0	0	0	0	0	0	0	0	0	0	0	0	0	0	0	0	0	0	0	0	0	0	26	157.41	0	0	0	0	0	0	0
CARD_101219_TM_#01	antibiotic target protection protein; otr(A)	tetracycline antibiotic	3000050	3000185	3002891	4	0	0	8	2.72081	0	0	0	0	0	0	0	0	0	0	0	0	0	0	2	0.0870109	0	0	0	0	0	0	0	0	0	0	0	0	0	0	0	0	0	0	0	0	0	0	0
CARD_102418_TM_#01	antibiotic target protection protein; poxtA	tetracycline, doxycycline, linezolid, chloramphenicol, florfenicol, macrolide antibiotic, lincosamide antibiotic, streptogramin antibiotic, tetracycline antibiotic, oxazolidinone antibiotic, phenicol antibiotic, pleuromutilin antibiotic	0000051, 0000069, 0000072, 3000385, 3000461, 0000000, 0000017, 0000026, 3000050, 3000079, 3000387, 3000670	3000185	3004470	4	0	0	0	0	0	0	0	0	0	0	0	0	0	0	0	0	0	0	0	0	0	0	0	0	0	0	0	0	0	0	548	81.8692	0	0	0	0	0	0	7	0.231712	0	0	0
NCBI_203951_TM_#02	antibiotic target protection protein; QnrA5	ciprofloxacin, levofloxacin, moxifloxacin, gatifloxacin, nalidixic acid, norfloxacin, sparfloxacin, fluoroquinolone antibiotic	0000036, 0000071, 0000074, 3000659, 3000661, 3000662, 3000666, 0000001	3000185	3002711	4	0	0	0	0	0	0	0	0	0	0	0	0	0	0	0	0	0	0	0	0	0	0	0	0	0	0	0	0	0	0	0	0	0	0	0	0	3	0.304272	0	0	0	0	0
NCBI_203951_TM_#04	antibiotic target protection protein; QnrA5	ciprofloxacin, levofloxacin, moxifloxacin, gatifloxacin, nalidixic acid, norfloxacin, sparfloxacin, fluoroquinolone antibiotic	0000036, 0000071, 0000074, 3000659, 3000661, 3000662, 3000666, 0000001	3000185	3002711	4	0	0	0	0	0	0	0	0	0	0	0	0	0	0	0	0	0	0	0	0	0	0	0	0	0	0	0	0	0	0	0	0	0	0	0	0	2	0.278486	0	0	0	0	0
NCBI_203951_TM_#08	antibiotic target protection protein; QnrA5	ciprofloxacin, levofloxacin, moxifloxacin, gatifloxacin, nalidixic acid, norfloxacin, sparfloxacin, fluoroquinolone antibiotic	0000036, 0000071, 0000074, 3000659, 3000661, 3000662, 3000666, 0000001	3000185	3002711	4	0	0	0	0	0	0	0	0	0	0	0	0	0	0	0	0	0	0	0	0	0	0	0	0	0	0	0	0	0	0	0	0	0	0	0	0	18	1.92705	0	0	0	0	0
CARD_100556_TM_#01	antibiotic target protection protein; QnrB58	ciprofloxacin, levofloxacin, moxifloxacin, gatifloxacin, nalidixic acid, norfloxacin, sparfloxacin, fluoroquinolone antibiotic	0000036, 0000071, 0000074, 3000659, 3000661, 3000662, 3000666, 0000001	3000185	3002771	4	1	0.391948	0	0	0	0	2	1.33006	41	41.976	76	92.3572	528	713.455	0	0	0	0	0	0	0	0	0	0	0	0	0	0	0	0	0	0	0	0	2	20.715	694	200.58	11	9.17542	25	16.4256	185
CARD_100556_TM_#02	antibiotic target protection protein; QnrB58	ciprofloxacin, levofloxacin, moxifloxacin, gatifloxacin, nalidixic acid, norfloxacin, sparfloxacin, fluoroquinolone antibiotic	0000036, 0000071, 0000074, 3000659, 3000661, 3000662, 3000666, 0000001	3000185	3002771	4	2	0.269464	0	0	22	21.0346	14	4.29072	110	40.7221	751	272.752	1931	793.787	0	0	2	0.543117	0	0	0	0	0	0	0	0	0	0	2	1.25483	0	0	0	0	67	290.605	13385	1300.73	5	1.3189	0	0	2223
CARD_100556_TM_#04	antibiotic target protection protein; QnrB58	ciprofloxacin, levofloxacin, moxifloxacin, gatifloxacin, nalidixic acid, norfloxacin, sparfloxacin, fluoroquinolone antibiotic	0000036, 0000071, 0000074, 3000659, 3000661, 3000662, 3000666, 0000001	3000185	3002771	4	5	1.34732	0	0	7	12.1819	0	0	757	635.083	479	445.42	1064	1051.63	23	10.7531	2	1.08623	0	0	0	0	0	0	7	10.245	0	0	1	1.25483	3	7.21445	0	0	16	155.64	6422	1430.89	298	200.832	91	66.6495	2824
CARD_101508_TM_#01	antibiotic target protection protein; QnrC	ciprofloxacin, levofloxacin, moxifloxacin, gatifloxacin, nalidixic acid, norfloxacin, sparfloxacin, fluoroquinolone antibiotic	0000036, 0000071, 0000074, 3000659, 3000661, 3000662, 3000666, 0000001	3000185	3002787	4	0	0	35	17.1835	154	24.2288	0	0	0	0	0	0	0	0	0	0	0	0	112	7.46671	20	9.60631	0	0	0	0	103	27.0413	11013	1239.27	0	0	0	0	0	0	0	0	0	0	0	0	14
CARD_100776_TM_#03	antibiotic target protection protein; QnrD2	ciprofloxacin, levofloxacin, moxifloxacin, gatifloxacin, nalidixic acid, norfloxacin, sparfloxacin, fluoroquinolone antibiotic	0000036, 0000071, 0000074, 3000659, 3000661, 3000662, 3000666, 0000001	3000185	3002789	4	0	0	0	0	0	0	4	0.525652	5	1.07587	0	0	29	7.45864	11	1.478	7	1.13704	0	0	0	0	0	0	25	4.69335	0	0	0	0	0	0	42	24.4979	4	7.99528	0	0	190	37.8622	4	0.531405	23
CARD_100776_TM_#01	antibiotic target protection protein; QnrD2	ciprofloxacin, levofloxacin, moxifloxacin, gatifloxacin, nalidixic acid, norfloxacin, sparfloxacin, fluoroquinolone antibiotic	0000036, 0000071, 0000074, 3000659, 3000661, 3000662, 3000666, 0000001	3000185	3002789	4	0	0	0	0	0	0	0	0	0	0	0	0	14	14.2864	0	0	0	0	0	0	0	0	0	0	0	0	0	0	0	0	0	0	6	19.7956	0	0	0	0	31	23.6035	0	0	0
CARD_100776_TM_#02	antibiotic target protection protein; QnrD2	ciprofloxacin, levofloxacin, moxifloxacin, gatifloxacin, nalidixic acid, norfloxacin, sparfloxacin, fluoroquinolone antibiotic	0000036, 0000071, 0000074, 3000659, 3000661, 3000662, 3000666, 0000001	3000185	3002789	4	0	0	0	0	0	0	0	0	0	0	0	0	0	0	0	0	0	0	0	0	0	0	0	0	0	0	0	0	0	0	0	0	0	0	0	0	0	0	8	6.63282	0	0	0
NCBI_206490_TM_#06	antibiotic target protection protein; qnrE1	ciprofloxacin, levofloxacin, moxifloxacin, gatifloxacin, nalidixic acid, norfloxacin, sparfloxacin, fluoroquinolone antibiotic	0000036, 0000071, 0000074, 3000659, 3000661, 3000662, 3000666, 0000001	3000185	3004636	4	40	6.16687	0	0	703	778.686	96	28.0803	1305	564.252	1721	640.758	1061	440.798	214	64.6061	893	309.244	14	6.61424	19	55.6955	0	0	1088	433.806	31	57.3679	1959	1467.64	57	83.4361	16	15.7538	865	3702.78	6099	597.935	316	101.235	449	129.173	4392
NCBI_206490_TM_#02	antibiotic target protection protein; qnrE1	ciprofloxacin, levofloxacin, moxifloxacin, gatifloxacin, nalidixic acid, norfloxacin, sparfloxacin, fluoroquinolone antibiotic	0000036, 0000071, 0000074, 3000659, 3000661, 3000662, 3000666, 0000001	3000185	3004636	4	0	0	0	0	0	0	4	1.12543	199	90.1839	694	323.153	528	277.08	0	0	34	12.9236	0	0	1	3.23473	0	0	0	0	77	150.107	0	0	20	29.5977	0	0	786	3903.58	3581	458.275	50	17.4037	0	0	3080
NCBI_206490_TM_#04	antibiotic target protection protein; qnrE1	ciprofloxacin, levofloxacin, moxifloxacin, gatifloxacin, nalidixic acid, norfloxacin, sparfloxacin, fluoroquinolone antibiotic	0000036, 0000071, 0000074, 3000659, 3000661, 3000662, 3000666, 0000001	3000185	3004636	4	0	0	0	0	0	0	0	0	97	127.894	253	319.384	201	299.741	0	0	1	0.965541	0	0	8	74.7582	0	0	0	0	13	67.0676	0	0	25	99.399	6	17.8483	275	3961.1	1377	489.338	12	12.5442	1	0.802028	847
CARD_100367_TM_#03	antibiotic target protection protein; QnrS6	ciprofloxacin, levofloxacin, moxifloxacin, gatifloxacin, nalidixic acid, norfloxacin, sparfloxacin, fluoroquinolone antibiotic	0000036, 0000071, 0000074, 3000659, 3000661, 3000662, 3000666, 0000001	3000185	3002795	4	0	0	26	91.3886	28	28.8756	1	0.270938	1	0.417106	0	0	12	5.9404	0	0	0	0	16	6.99211	0	0	0	0	0	0	368	713.818	0	0	0	0	0	0	0	0	70	7.69591	0	0	0	0	16
CARD_100367_TM_#07	antibiotic target protection protein; QnrS6	ciprofloxacin, levofloxacin, moxifloxacin, gatifloxacin, nalidixic acid, norfloxacin, sparfloxacin, fluoroquinolone antibiotic	0000036, 0000071, 0000074, 3000659, 3000661, 3000662, 3000666, 0000001	3000185	3002795	4	0	0	0	0	0	0	0	0	0	0	0	0	1	2.94836	0	0	0	0	4	4.16117	0	0	0	0	0	0	228	1802.99	4	20.0772	0	0	0	0	0	0	21	10.8246	0	0	0	0	31
CARD_101700_TM_#06	antibiotic target protection protein; QnrVC1	ciprofloxacin, levofloxacin, moxifloxacin, gatifloxacin, nalidixic acid, norfloxacin, sparfloxacin, fluoroquinolone antibiotic	0000036, 0000071, 0000074, 3000659, 3000661, 3000662, 3000666, 0000001	3000185	3002799	4	0	0	29	78.6239	1	0.870136	1	0.228604	0	0	0	0	3	1.10564	0	0	0	0	175	73.6642	26	68.6501	1043	3748.43	0	0	428	717.18	0	0	0	0	0	0	9	32.0436	1	0.0855764	0	0	0	0	50
CARD_101700_TM_#07	antibiotic target protection protein; QnrVC1	ciprofloxacin, levofloxacin, moxifloxacin, gatifloxacin, nalidixic acid, norfloxacin, sparfloxacin, fluoroquinolone antibiotic	0000036, 0000071, 0000074, 3000659, 3000661, 3000662, 3000666, 0000001	3000185	3002799	4	0	0	1	5.10152	1	1.6379	1	0.430313	0	0	0	0	0	0	0	0	0	0	72	101.174	24	118.833	392	3315.13	0	0	154	530.289	5	15.9043	0	0	0	0	6	40.7587	1	0.161085	0	0	0	0	13
CARD_101700_TM_#02	antibiotic target protection protein; QnrVC1	ciprofloxacin, levofloxacin, moxifloxacin, gatifloxacin, nalidixic acid, norfloxacin, sparfloxacin, fluoroquinolone antibiotic	0000036, 0000071, 0000074, 3000659, 3000661, 3000662, 3000666, 0000001	3000185	3002799	4	0	0	0	0	2	1.79641	0	0	0	0	0	0	2	0.73709	0	0	0	0	0	0	0	0	0	0	0	0	49	70.7101	0	0	4	8.24508	0	0	0	0	0	0	0	0	0	0	19
CARD_101700_TM_#03	antibiotic target protection protein; QnrVC1	ciprofloxacin, levofloxacin, moxifloxacin, gatifloxacin, nalidixic acid, norfloxacin, sparfloxacin, fluoroquinolone antibiotic	0000036, 0000071, 0000074, 3000659, 3000661, 3000662, 3000666, 0000001	3000185	3002799	4	0	0	0	0	18	23.8666	0	0	0	0	0	0	2	3.07655	0	0	0	0	71	46.8377	6	24.0294	290	1684.76	0	0	243	1074.88	7	6.70783	0	0	0	0	4	21.7015	0	0	0	0	0	0	27
CARD_101700_TM_#04	antibiotic target protection protein; QnrVC1	ciprofloxacin, levofloxacin, moxifloxacin, gatifloxacin, nalidixic acid, norfloxacin, sparfloxacin, fluoroquinolone antibiotic	0000036, 0000071, 0000074, 3000659, 3000661, 3000662, 3000666, 0000001	3000185	3002799	4	0	0	0	0	12	15.1878	0	0	0	0	0	0	5	2.68858	0	0	0	0	85	51.8482	16	61.1658	710	3334.53	0	0	350	862.275	8	9.89171	7	12.9423	0	0	0	0	0	0	0	0	0	0	37
CARD_101700_TM_#05	antibiotic target protection protein; QnrVC1	ciprofloxacin, levofloxacin, moxifloxacin, gatifloxacin, nalidixic acid, norfloxacin, sparfloxacin, fluoroquinolone antibiotic	0000036, 0000071, 0000074, 3000659, 3000661, 3000662, 3000666, 0000001	3000185	3002799	4	0	0	0	0	19	22.1135	2	1.62563	0	0	0	0	0	0	0	0	0	0	45	50.8857	26	161.641	195	1857.85	0	0	30	102.366	4	5.1261	5	11.6042	0	0	5	63.296	0	0	0	0	0	0	10
NCBI_203609_TM_#04	antibiotic target protection protein; QnrVC4	ciprofloxacin, levofloxacin, moxifloxacin, gatifloxacin, nalidixic acid, norfloxacin, sparfloxacin, fluoroquinolone antibiotic	0000036, 0000071, 0000074, 3000659, 3000661, 3000662, 3000666, 0000001	3000185	3002801	4	0	0	8	26.2658	0	0	0	0	0	0	0	0	9	4.29766	0	0	0	0	8	2.68366	0	0	48	138.158	0	0	207	297.371	53	27.4342	0	0	0	0	0	0	245	25.2253	0	0	0	0	0
NCBI_203609_TM_#02	antibiotic target protection protein; QnrVC4	ciprofloxacin, levofloxacin, moxifloxacin, gatifloxacin, nalidixic acid, norfloxacin, sparfloxacin, fluoroquinolone antibiotic	0000036, 0000071, 0000074, 3000659, 3000661, 3000662, 3000666, 0000001	3000185	3002801	4	0	0	0	0	0	0	0	0	0	0	0	0	0	0	0	0	0	0	0	0	0	0	0	0	0	0	8	7.95967	0	0	0	0	0	0	0	0	12	0.710057	0	0	0	0	0
NCBI_203609_TM_#03	antibiotic target protection protein; QnrVC4	ciprofloxacin, levofloxacin, moxifloxacin, gatifloxacin, nalidixic acid, norfloxacin, sparfloxacin, fluoroquinolone antibiotic	0000036, 0000071, 0000074, 3000659, 3000661, 3000662, 3000666, 0000001	3000185	3002801	4	0	0	0	0	0	0	0	0	0	0	0	0	0	0	0	0	0	0	0	0	0	0	0	0	0	0	41	315.245	0	0	0	0	0	0	0	0	89	26.1539	0	0	0	0	0
NCBI_203609_TM_#01	antibiotic target protection protein; QnrVC4	ciprofloxacin, levofloxacin, moxifloxacin, gatifloxacin, nalidixic acid, norfloxacin, sparfloxacin, fluoroquinolone antibiotic	0000036, 0000071, 0000074, 3000659, 3000661, 3000662, 3000666, 0000001	3000185	3002801	4	0	0	0	0	0	0	0	0	0	0	0	0	0	0	0	0	0	0	0	0	0	0	0	0	0	0	0	0	0	0	0	0	0	0	0	0	6	1.20224	0	0	0	0	0
CARD_101338_TM_#01	antibiotic target protection protein; RbpA	rifampin, rifaximin, rifabutin, rifapentine, rifamycin antibiotic	3000169, 3000517, 3000530, 3000534, 3000157	3000185	3000245	5	87	5.31973	353	429.608	204	77.6092	483	48.8008	954	152.293	192	27.5549	2072	336.923	39	4.16442	75	8.83289	515	84.4034	253	296.635	34	46.1219	1192	171.757	451	285.379	68	18.7843	52	28.1665	57	19.465	17	25.6578	44	1.61512	275	31.5288	37	3.70815	0
CARD_102022_TM_#01	antibiotic target protection protein; salA	lincomycin, pleuromutilin, macrolide antibiotic, lincosamide antibiotic, streptogramin antibiotic, tetracycline antibiotic, oxazolidinone antibiotic, phenicol antibiotic, pleuromutilin antibiotic	0000046, 3001317, 0000000, 0000017, 0000026, 3000050, 3000079, 3000387, 3000670	3000185	3003749	4	0	0	0	0	0	0	0	0	0	0	68	2.68053	54	2.47192	15	0.431573	0	0	6	0.273975	0	0	0	0	0	0	0	0	0	0	0	0	0	0	23	10.2058	75	0.798353	4	0.132407	61	1.72369	0
RESF_302924_TM_#01	antibiotic target protection protein; tet(44)	tetracycline, doxycycline, minocycline, chlortetracycline, demeclocycline, oxytetracycline, tetracycline antibiotic	0000051, 0000069, 3000152, 3000528, 3000667, 3000668, 3000050	3000185	3000556	4	0	0	11	10.5998	0	0	81	6.16259	0	0	5	0.472342	633	78.1006	2	0.165925	0	0	1	0.110878	0	0	0	0	25	2.44852	408	190.595	0	0	39	15.7184	6	1.43327	4	4.22626	2	0.0524942	25	2.12165	0	0	0
RESF_302924_TM_#03	antibiotic target protection protein; tet(44)	tetracycline, doxycycline, minocycline, chlortetracycline, demeclocycline, oxytetracycline, tetracycline antibiotic	0000051, 0000069, 3000152, 3000528, 3000667, 3000668, 3000050	3000185	3000556	4	0	0	7	23.3926	0	0	11	4.98803	0	0	0	0	203	106.381	1	0.287709	0	0	0	0	0	0	1	3.84216	0	0	33	60.9963	0	0	0	0	0	0	0	0	0	0	0	0	0	0	0
RESF_302924_TM_#05	antibiotic target protection protein; tet(44)	tetracycline, doxycycline, minocycline, chlortetracycline, demeclocycline, oxytetracycline, tetracycline antibiotic	0000051, 0000069, 3000152, 3000528, 3000667, 3000668, 3000050	3000185	3000556	4	0	0	17	32.0509	0	0	24	3.35018	0	0	0	0	728	169.517	1	0.162618	0	0	0	0	0	0	0	0	0	0	222	214.801	0	0	27	21.1242	0	0	0	0	0	0	3	0.550497	0	0	0
RESF_302924_TM_#02	antibiotic target protection protein; tet(44)	tetracycline, doxycycline, minocycline, chlortetracycline, demeclocycline, oxytetracycline, tetracycline antibiotic	0000051, 0000069, 3000152, 3000528, 3000667, 3000668, 3000050	3000185	3000556	4	0	0	0	0	0	0	2	1.82883	0	0	0	0	44	77.8264	0	0	0	0	0	0	0	0	0	0	0	0	0	0	0	0	7	33.6674	0	0	0	0	0	0	0	0	0	0	0
CARD_102629_TM_#01	antibiotic target protection protein; tet(57)	tetracycline antibiotic	3000050	3000185	3005006	4	0	0	0	0	0	0	0	0	0	0	0	0	0	0	0	0	0	0	0	0	0	0	0	0	0	0	0	0	0	0	0	0	0	0	0	0	55	0.563519	0	0	0	0	2
RESF_303039_TM_#07	antibiotic target protection protein; tet32	tetracycline, doxycycline, minocycline, chlortetracycline, demeclocycline, oxytetracycline, tetracycline antibiotic	0000051, 0000069, 3000152, 3000528, 3000667, 3000668, 3000050	3000185	3000196	4	1	0.159682	0	0	0	0	0	0	0	0	0	0	114	68.5509	0	0	0	0	0	0	58	203.647	0	0	0	0	0	0	0	0	1	1.42508	4	3.7546	0	0	0	0	0	0	0	0	0
RESF_303039_TM_#01	antibiotic target protection protein; tet32	tetracycline, doxycycline, minocycline, chlortetracycline, demeclocycline, oxytetracycline, tetracycline antibiotic	0000051, 0000069, 3000152, 3000528, 3000667, 3000668, 3000050	3000185	3000196	4	0	0	7	25.2951	43	50.9056	72	30.4151	0	0	145	75.0267	361	239.997	10	4.0837	1	0.362078	43	30.1595	155	635.361	1	4.16234	122	56.6946	94	196.746	2	2.73781	74	199.904	715	894.508	2	9.4944	19	2.85255	31	12.6788	0	0	0
RESF_303039_TM_#05	antibiotic target protection protein; tet32	tetracycline, doxycycline, minocycline, chlortetracycline, demeclocycline, oxytetracycline, tetracycline antibiotic	0000051, 0000069, 3000152, 3000528, 3000667, 3000668, 3000050	3000185	3000196	4	0	0	3	13.6936	0	0	12	5.00522	0	0	0	0	125	197.303	0	0	0	0	0	0	33	208.861	0	0	0	0	30	73.3564	1	1.0567	22	101.053	0	0	0	0	0	0	0	0	0	0	0
RESF_303039_TM_#10	antibiotic target protection protein; tet32	tetracycline, doxycycline, minocycline, chlortetracycline, demeclocycline, oxytetracycline, tetracycline antibiotic	0000051, 0000069, 3000152, 3000528, 3000667, 3000668, 3000050	3000185	3000196	4	0	0	0	0	0	0	12	3.81669	0	0	8	3.55968	184	115.654	0	0	0	0	1	0.512608	152	1084.09	0	0	0	0	0	0	0	0	15	25.0937	7	7.95637	6	29.7216	0	0	0	0	0	0	0
RESF_303039_TM_#08	antibiotic target protection protein; tet32	tetracycline, doxycycline, minocycline, chlortetracycline, demeclocycline, oxytetracycline, tetracycline antibiotic	0000051, 0000069, 3000152, 3000528, 3000667, 3000668, 3000050	3000185	3000196	4	0	0	0	0	0	0	0	0	0	0	0	0	121	53.4463	0	0	0	0	0	0	103	268.508	0	0	0	0	0	0	0	0	23	35.8998	5	4.35385	0	0	0	0	2	0.588903	0	0	0
RESF_303039_TM_#09	antibiotic target protection protein; tet32	tetracycline, doxycycline, minocycline, chlortetracycline, demeclocycline, oxytetracycline, tetracycline antibiotic	0000051, 0000069, 3000152, 3000528, 3000667, 3000668, 3000050	3000185	3000196	4	0	0	0	0	0	0	0	0	0	0	0	0	146	63.2448	0	0	0	0	0	0	68	203.279	0	0	23	8.9738	0	0	0	0	4	4.35112	15	15.4934	0	0	0	0	0	0	0	0	0
CARD_101608_TM_#01	antibiotic target protection protein; tet36	tetracycline, doxycycline, minocycline, chlortetracycline, demeclocycline, oxytetracycline, tetracycline antibiotic	0000051, 0000069, 3000152, 3000528, 3000667, 3000668, 3000050	3000185	3000197	4	0	0	0	0	0	0	0	0	0	0	0	0	97	4.43197	0	0	0	0	0	0	50	16.0077	0	0	0	0	0	0	0	0	0	0	2	0.194426	0	0	38	0.400601	197	6.43195	0	0	21
CARD_100758_TM_#01	antibiotic target protection protein; tetB(P)	tetracycline, doxycycline, minocycline, chlortetracycline, demeclocycline, oxytetracycline, tetracycline antibiotic	0000051, 0000069, 3000152, 3000528, 3000667, 3000668, 3000050	3000185	3000195	4	3	0.0474749	65	22.0181	3	0.327581	163	4.62524	5	0.214605	84	3.32572	6342	288.847	2	0.05867	0	0	105	4.78088	17	5.49504	0	0	0	0	23803	4284.37	7	0.532044	148	22.2073	4	0.368615	0	0	8	0.0843263	0	0	0	0	126
RESF_303043_TM_#05	antibiotic target protection protein; tetM	tetracycline, doxycycline, minocycline, chlortetracycline, demeclocycline, oxytetracycline, tetracycline antibiotic	0000051, 0000069, 3000152, 3000528, 3000667, 3000668, 3000050	3000185	3000186	4	200	173.703	17	491.447	177	969.198	664	872.31	6	7.28349	1319	2669.55	856	1697.61	6	6.38037	0	0	225	410.971	2166	32126.2	47	1555.05	786	1714.67	118	681.202	34	106.085	368	3032.59	182	727.634	48	990.303	63	34.5342	54	81.4588	0	0	42
RESF_303043_TM_#06	antibiotic target protection protein; tetM	tetracycline, doxycycline, minocycline, chlortetracycline, demeclocycline, oxytetracycline, tetracycline antibiotic	0000051, 0000069, 3000152, 3000528, 3000667, 3000668, 3000050	3000185	3000186	4	340	86.107	19	82.3896	284	399.604	955	508.043	2	1.12619	1825	1168.01	1270	893.114	0	0	9	5.53629	375	269.948	3558	18295.8	0	0	1527	965.38	24	56.0557	52	72.4275	988	2194.39	196	290.357	132	770.903	94	18.491	83	41.295	0	0	79
RESF_303043_TM_#14	antibiotic target protection protein; tetM	tetracycline, doxycycline, minocycline, chlortetracycline, demeclocycline, oxytetracycline, tetracycline antibiotic	0000051, 0000069, 3000152, 3000528, 3000667, 3000668, 3000050	3000185	3000186	4	580	102.536	52	161.1	501	578.137	1987	651.86	10	4.67099	3977	1803.88	3248	1723.51	4	1.16578	39	15.5916	944	479.603	6506	23663.5	20	71.3974	2357	964.722	120	218.571	91	89.7064	1227	1927.84	348	352.254	204	967.671	185	23.0099	182	63.529	0	0	178
RESF_303043_TM_#15	antibiotic target protection protein; tetM	tetracycline, doxycycline, minocycline, chlortetracycline, demeclocycline, oxytetracycline, tetracycline antibiotic	0000051, 0000069, 3000152, 3000528, 3000667, 3000668, 3000050	3000185	3000186	4	429	110.686	22	95.3985	473	871.17	1472	676.585	24	13.5142	3211	2183.54	2206	1574.52	211	88.6645	1	0.434493	706	579.779	5794	32014.7	4	19.9792	2417	1278.54	84	251.471	62	70.8021	989	2054.41	342	579.137	208	1511.75	135	24.7235	181	92.7969	0	0	108
RESF_303043_TM_#16	antibiotic target protection protein; tetM	tetracycline, doxycycline, minocycline, chlortetracycline, demeclocycline, oxytetracycline, tetracycline antibiotic	0000051, 0000069, 3000152, 3000528, 3000667, 3000668, 3000050	3000185	3000186	4	265	44.2789	123	391.56	474	498.131	1529	457.704	15	6.03314	3381	1436.31	2385	1141.29	2	0.534316	18	5.9273	816	397.471	7381	25107.5	0	0	1517	626.28	40	66.3306	121	100.816	32	73.5604	221	213.264	176	758.409	144	15.5638	158	53.0171	0	0	152
RESF_303042_TM_#03	antibiotic target protection protein; tetO	tetracycline, doxycycline, minocycline, chlortetracycline, demeclocycline, oxytetracycline, tetracycline antibiotic	0000051, 0000069, 3000152, 3000528, 3000667, 3000668, 3000050	3000185	3000190	4	12	2.33001	5	16.0604	0	0	50	14.2564	0	0	42	17.5086	4	1.78212	7	1.93937	0	0	39	19.022	38	156.681	0	0	88	34.6657	0	0	0	0	90	178.29	461	473.701	0	0	11	1.22879	23	7.36787	0	0	0
RESF_303042_TM_#06	antibiotic target protection protein; tetO	tetracycline, doxycycline, minocycline, chlortetracycline, demeclocycline, oxytetracycline, tetracycline antibiotic	0000051, 0000069, 3000152, 3000528, 3000667, 3000668, 3000050	3000185	3000190	4	1	0.165824	0	0	0	0	104	32.3026	0	0	38	16.8981	4	3.07655	13	4.32684	0	0	30	16.3661	24	84.3494	31	119.207	646	306.284	0	0	5	3.86101	101	151.787	824	942.249	2	8.76406	8	2.62891	12	4.18374	0	0	2
RESF_303042_TM_#08	antibiotic target protection protein; tetO	tetracycline, doxycycline, minocycline, chlortetracycline, demeclocycline, oxytetracycline, tetracycline antibiotic	0000051, 0000069, 3000152, 3000528, 3000667, 3000668, 3000050	3000185	3000190	4	10	1.37693	1	2.71019	0	0	67	17.5684	0	0	11	3.73671	0	0	16	3.74022	0	0	19	8.67467	14	39.1031	0	0	167	58.0109	0	0	4	2.50966	57	88.0071	831	728.526	0	0	14	1.19807	23	6.24278	0	0	0
RESF_303042_TM_#10	antibiotic target protection protein; tetO	tetracycline, doxycycline, minocycline, chlortetracycline, demeclocycline, oxytetracycline, tetracycline antibiotic	0000051, 0000069, 3000152, 3000528, 3000667, 3000668, 3000050	3000185	3000190	4	13	1.80802	9	25.1785	6	5.38923	188	38.8014	0	0	252	75.8259	4	1.03747	6	1.44269	0	0	154	50.2377	125	314.498	0	0	827	244.908	0	0	2	1.28842	242	273.628	1466	1059.65	0	0	26	1.85071	94	20.8557	0	0	1
RESF_303042_TM_#02	antibiotic target protection protein; tetO	tetracycline, doxycycline, minocycline, chlortetracycline, demeclocycline, oxytetracycline, tetracycline antibiotic	0000051, 0000069, 3000152, 3000528, 3000667, 3000668, 3000050	3000185	3000190	4	0	0	6	21.6815	0	0	53	19.0101	0	0	39	19.2824	4	1.96557	10	3.15351	0	0	16	12.5056	13	45.6545	12	51.3752	383	168.285	0	0	0	0	53	86.2325	514	620.905	0	0	4	0.456408	25	10.0285	0	0	0
RESF_303042_TM_#01	antibiotic target protection protein; tetO	tetracycline, doxycycline, minocycline, chlortetracycline, demeclocycline, oxytetracycline, tetracycline antibiotic	0000051, 0000069, 3000152, 3000528, 3000667, 3000668, 3000050	3000185	3000190	4	0	0	0	0	37	147.596	33	32.9924	0	0	66	97.8615	0	0	0	0	0	0	16	18.4186	32	220.122	0	0	179	189.534	2	21.4299	0	0	27	163.344	347	1260.18	3	48.8283	9	3.54042	2	2.11024	0	0	0
RESF_303042_TM_#11	antibiotic target protection protein; tetO	tetracycline, doxycycline, minocycline, chlortetracycline, demeclocycline, oxytetracycline, tetracycline antibiotic	0000051, 0000069, 3000152, 3000528, 3000667, 3000668, 3000050	3000185	3000190	4	0	0	0	0	15	19.9102	49	18.6532	0	0	125	74.7664	3	1.69384	0	0	0	0	37	34.9682	110	578.713	0	0	348	170.157	0	0	0	0	100	210.138	665	1001.69	0	0	9	1.17362	17	7.24395	0	0	1
RESF_303042_TM_#04	antibiotic target protection protein; tetO	tetracycline, doxycycline, minocycline, chlortetracycline, demeclocycline, oxytetracycline, tetracycline antibiotic	0000051, 0000069, 3000152, 3000528, 3000667, 3000668, 3000050	3000185	3000190	4	0	0	0	0	0	0	82	25.3606	0	0	32	12.9893	13	8.56533	7	1.96977	0	0	17	6.9716	38	124.157	31	106.786	358	147.265	0	0	8	6.78667	116	176.711	640	608.085	0	0	9	0.85096	27	9.21212	0	0	6
CARD_101114_TM_#01	antibiotic target protection protein; tetQ	tetracycline, doxycycline, minocycline, chlortetracycline, demeclocycline, oxytetracycline, tetracycline antibiotic	0000051, 0000069, 3000152, 3000528, 3000667, 3000668, 3000050	3000185	3000191	4	2	0.278157	0	0	0	0	0	0	10	4.10724	20	9.78792	0	0	2	0.547349	0	0	0	0	33	102.237	0	0	6	2.33432	0	0	36	23.5701	187	247.743	56	59.6722	0	0	23	2.08745	0	0	0	0	0
CARD_101114_TM_#02	antibiotic target protection protein; tetQ	tetracycline, doxycycline, minocycline, chlortetracycline, demeclocycline, oxytetracycline, tetracycline antibiotic	0000051, 0000069, 3000152, 3000528, 3000667, 3000668, 3000050	3000185	3000191	4	63	7.27851	0	0	0	0	0	0	8	2.73015	28	8.38002	0	0	0	0	0	0	0	0	47	103.097	0	0	20	6.14703	64	89.5816	84	45.056	336	369.481	81	50.45	0	0	49	3.55499	4	1.02315	1	0.218735	0
CARD_101114_TM_#07	antibiotic target protection protein; tetQ	tetracycline, doxycycline, minocycline, chlortetracycline, demeclocycline, oxytetracycline, tetracycline antibiotic	0000051, 0000069, 3000152, 3000528, 3000667, 3000668, 3000050	3000185	3000191	4	1	0.165824	0	0	0	0	0	0	12	10.8333	13	5.13278	0	0	4	1.24531	0	0	0	0	7	22.6851	0	0	4	1.86274	3	5.38066	25	20.1575	166	264.209	92	118.813	0	0	15	2.33219	0	0	0	0	0
CARD_101114_TM_#14	antibiotic target protection protein; tetQ	tetracycline, doxycycline, minocycline, chlortetracycline, demeclocycline, oxytetracycline, tetracycline antibiotic	0000051, 0000069, 3000152, 3000528, 3000667, 3000668, 3000050	3000185	3000191	4	4	0.84815	0	0	0	0	4	1.12909	0	0	25	9.84045	0	0	0	0	0	0	3	1.36038	4	12.9809	0	0	0	0	0	0	65	53.5884	143	231.688	43	57.6376	0	0	11	1.22088	0	0	0	0	0
CARD_101114_TM_#08	antibiotic target protection protein; tetQ	tetracycline, doxycycline, minocycline, chlortetracycline, demeclocycline, oxytetracycline, tetracycline antibiotic	0000051, 0000069, 3000152, 3000528, 3000667, 3000668, 3000050	3000185	3000191	4	0	0	0	0	0	0	0	0	5	2.56739	8	3.72148	0	0	2	0.680039	0	0	0	0	7	26.76	0	0	0	0	0	0	36	55.3215	116	218.496	40	93.2257	0	0	3	0.373424	4	1.94791	0	0	0
CARD_101114_TM_#13	antibiotic target protection protein; tetQ	tetracycline, doxycycline, minocycline, chlortetracycline, demeclocycline, oxytetracycline, tetracycline antibiotic	0000051, 0000069, 3000152, 3000528, 3000667, 3000668, 3000050	3000185	3000191	4	0	0	0	0	0	0	0	0	3	1.25132	33	12.6043	0	0	1	0.277053	0	0	3	1.31	36	123.514	0	0	0	0	3	5.15904	97	87.2406	311	493.284	121	133.537	0	0	25	2.60872	2	0.625255	0	0	0
RESF_303044_TM_#01	antibiotic target protection protein; tetracycline-resistant ribosomal protection protein	tetracycline antibiotic	3000050	3000185	2	3	42	6.32051	12	33.6321	32	32.2175	113	35.2286	0	0	393	152.53	464	219.237	208	58.6058	0	0	84	37.0317	620	2096.5	11	35.4821	3407	1323.98	4253	7270.2	8	5.7392	192	278.853	1704	1579.46	66	279.457	50	4.80684	612	185.151	0	0	0
RESF_303044_TM_#04	antibiotic target protection protein; tetracycline-resistant ribosomal protection protein	tetracycline antibiotic	3000050	3000185	2	3	778	151.528	127	411.39	704	812.68	2180	717.45	21	9.72736	4770	2120.37	3106	1636.73	59	16.6225	9	3.10767	916	491.619	8308	31106.4	204	861.466	5774	2348.77	4694	8733.9	98	91.0513	1607	2594.68	1166	1234.66	295	1420.11	178	24.0438	835	307.444	20	5.35019	200
RESF_303044_TM_#05	antibiotic target protection protein; tetracycline-resistant ribosomal protection protein	tetracycline antibiotic	3000050	3000185	2	3	97	9.20871	7	10.9349	68	40.8633	56	9.32372	4	1.09872	871	201.872	14	3.90019	111	18.8916	0	0	61	15.9528	813	1542.41	155	272.955	7529	1731.18	8427	8932.06	12	5.44779	294	261.93	2057	1146	122	315.878	37	2.20443	1317	251.45	0	0	14
RESF_303044_TM_#09	antibiotic target protection protein; tetracycline-resistant ribosomal protection protein	tetracycline antibiotic	3000050	3000185	2	3	28	6.79174	16	77.1806	42	69.6374	9	3.65766	1	0.637464	216	139.821	0	0	34	14.4533	0	0	12	7.89706	129	634.313	32	179.479	1310	1046.94	1991	5794.82	4	5.01931	66	141.653	378	598.967	33	311.215	4	0.608543	283	159.377	0	0	2
RESF_303044_TM_#08	antibiotic target protection protein; tetracycline-resistant ribosomal protection protein	tetracycline antibiotic	3000050	3000185	2	3	0	0	0	0	68	90.5459	5	1.91592	0	0	74	48.3529	14	7.8623	0	0	0	0	2	1.81384	90	822.8	0	0	45	22.7601	2	4.49453	0	0	0	0	198	308.521	0	0	0	0	12	5.05797	0	0	0
RESF_303044_TM_#14	antibiotic target protection protein; tetracycline-resistant ribosomal protection protein	tetracycline antibiotic	3000050	3000185	2	3	0	0	0	0	18	16.7275	82	22.9122	2	0.750791	226	98.2385	4	1.57688	0	0	0	0	66	35.3427	142	490.322	0	0	968	342.341	0	0	0	0	129	177.73	1147	1118.35	0	0	15	1.36922	29	9.5628	0	0	1
RESF_303002_TM_#01	antibiotic target protection protein; tetS	tetracycline, doxycycline, minocycline, chlortetracycline, demeclocycline, oxytetracycline, tetracycline antibiotic	0000051, 0000069, 3000152, 3000528, 3000667, 3000668, 3000050	3000185	3000192	4	39	8.24514	12	45.3592	14	22.483	21	6.73164	0	0	159	84.8655	316	223.007	147	55.3834	0	0	17	8.77464	284	1424.34	6	26.0599	1619	950.112	2764	6919.19	2	1.74585	72	122.992	563	793.581	48	317.424	19	2.26219	427	196.774	0	0	0
RESF_303002_TM_#02	antibiotic target protection protein; tetS	tetracycline, doxycycline, minocycline, chlortetracycline, demeclocycline, oxytetracycline, tetracycline antibiotic	0000051, 0000069, 3000152, 3000528, 3000667, 3000668, 3000050	3000185	3000192	4	63	1.16727	0	0	2	0.244249	93	2.86769	0	0	218	9.40862	180	9.07919	1790	58.0858	0	0	37	1.80385	259	91.813	0	0	33	1.47274	0	0	14	1.18395	125	20.4727	149	15.9287	4	1.85382	2	0.0222337	2	0.0714326	0	0	8
CARD_101917_TM_#01	antibiotic target protection protein; tetT	tetracycline, doxycycline, minocycline, chlortetracycline, demeclocycline, oxytetracycline, tetracycline antibiotic	0000051, 0000069, 3000152, 3000528, 3000667, 3000668, 3000050	3000185	3000193	4	0	0	0	0	13211	1429.4	1549	43.7969	2	0.0883283	913	36.0973	13	0.591339	2	0.05867	0	0	1670	76.1241	29187	9509.45	0	0	5	0.197962	0	0	1	0.0787343	0	0	334	32.0346	16032	7079.12	18	0.193302	0	0	0	0	2
NCBI_200481_TM_#01	antibiotic target protection protein; tetW	tetracycline, doxycycline, minocycline, chlortetracycline, demeclocycline, oxytetracycline, tetracycline antibiotic	0000051, 0000069, 3000152, 3000528, 3000667, 3000668, 3000050	3000185	3000194	4	42	6.32051	12	33.6321	32	32.2175	113	35.2286	0	0	393	152.53	464	219.237	208	58.6058	0	0	84	37.0317	620	2096.5	11	35.4821	3407	1323.98	4253	7270.2	8	5.7392	192	278.853	1704	1579.46	66	279.457	50	4.80684	612	185.151	0	0	0
NCBI_200481_TM_#04	antibiotic target protection protein; tetW	tetracycline, doxycycline, minocycline, chlortetracycline, demeclocycline, oxytetracycline, tetracycline antibiotic	0000051, 0000069, 3000152, 3000528, 3000667, 3000668, 3000050	3000185	3000194	4	43	9.82322	17	62.8049	8	15.1878	38	16.3473	0	0	458	224.405	0	0	54	16.4437	0	0	26	16.5872	317	1277.43	66	263.726	2660	1184.28	4069	8160.07	0	0	113	187.975	760	830.627	40	215.815	13	1.42399	575	221.418	20	5.7785	20
NCBI_200481_TM_#07	antibiotic target protection protein; tetW	tetracycline, doxycycline, minocycline, chlortetracycline, demeclocycline, oxytetracycline, tetracycline antibiotic	0000051, 0000069, 3000152, 3000528, 3000667, 3000668, 3000050	3000185	3000194	4	7	3.49835	0	0	46	219.752	22	20.1569	0	0	207	279.35	0	0	23	22.9947	0	0	10	17.8401	259	3036.6	65	474.942	1233	1489.8	1554	8688.92	0	0	24	114.509	314	1008.66	14	200.002	1	0.342306	253	289.524	0	0	0
NCBI_200481_TM_#12	antibiotic target protection protein; tetW	tetracycline, doxycycline, minocycline, chlortetracycline, demeclocycline, oxytetracycline, tetracycline antibiotic	0000051, 0000069, 3000152, 3000528, 3000667, 3000668, 3000050	3000185	3000194	4	70	19.3718	35	138.219	0	0	38	20.9955	2	1.29945	308	157.613	0	0	50	19.1581	1	0.362078	62	53.9111	289	1237.31	6	24.9741	5154	2667.71	4011	9599.05	12	10.6291	132	228.663	764	987.142	79	393.468	4	0.456408	492	203.555	0	0	0
NCBI_200481_TM_#13	antibiotic target protection protein; tetW	tetracycline, doxycycline, minocycline, chlortetracycline, demeclocycline, oxytetracycline, tetracycline antibiotic	0000051, 0000069, 3000152, 3000528, 3000667, 3000668, 3000050	3000185	3000194	4	490	86.6245	113	350.076	267	312.127	1985	628.465	5	2.01105	4348	1958.87	1091	554.469	241	72.86	25	8.69527	162	83.198	2843	10491.3	79	290.542	5482	2220.35	4444	8349.06	9	6.46204	1410	2214.32	1141	1200.72	126	610.003	228	27.9829	792	288.415	13	3.37338	44
NCBI_200481_TM_#14	antibiotic target protection protein; tetW	tetracycline, doxycycline, minocycline, chlortetracycline, demeclocycline, oxytetracycline, tetracycline antibiotic	0000051, 0000069, 3000152, 3000528, 3000667, 3000668, 3000050	3000185	3000194	4	160	26.7208	51	170.116	352	457.051	1435	473.123	27	12.3757	1115	509.101	2360	1189.76	82	24.7576	11	3.67648	923	481.549	7354	27293.2	105	660.191	3415	1582.34	5725	12795.2	63	51.9632	443	747.525	1961	2243.33	329	1750.73	120	13.5912	910	366.34	12	3.3315	114
NCBI_200481_TM_#16	antibiotic target protection protein; tetW	tetracycline, doxycycline, minocycline, chlortetracycline, demeclocycline, oxytetracycline, tetracycline antibiotic	0000051, 0000069, 3000152, 3000528, 3000667, 3000668, 3000050	3000185	3000194	4	3	4.31143	0	0	0	0	15	21.1916	0	0	203	286.102	0	0	34	57.9808	0	0	0	0	187	2340.52	1	17.6287	1923	3659.16	1492	11614.9	0	0	46	225.903	308	1191.88	21	287.642	14	8.79622	368	449.957	0	0	0
CARD_102187_TM_#02	antibiotic target protection protein; tva(A)	pleuromutilin, macrolide antibiotic, lincosamide antibiotic, streptogramin antibiotic, tetracycline antibiotic, oxazolidinone antibiotic, phenicol antibiotic, pleuromutilin antibiotic	3001317, 0000000, 0000017, 0000026, 3000050, 3000079, 3000387, 3000670	3000185	3004730	4	0	0	0	0	0	0	0	0	0	0	0	0	0	0	0	0	0	0	2	0.982498	2	7.05794	0	0	24	10.245	20	38.6928	2	1.6731	0	0	35	36.1657	0	0	0	0	0	0	0	0	0
CARD_102187_TM_#01	antibiotic target protection protein; tva(A)	pleuromutilin, macrolide antibiotic, lincosamide antibiotic, streptogramin antibiotic, tetracycline antibiotic, oxazolidinone antibiotic, phenicol antibiotic, pleuromutilin antibiotic	3001317, 0000000, 0000017, 0000026, 3000050, 3000079, 3000387, 3000670	3000185	3004730	4	0	0	0	0	0	0	0	0	0	0	0	0	0	0	0	0	0	0	0	0	16	53.8714	0	0	3	1.77318	78	158.908	12	10.3506	0	0	21	23.1121	0	0	0	0	0	0	0	0	0
CARD_102187_TM_#05	antibiotic target protection protein; tva(A)	pleuromutilin, macrolide antibiotic, lincosamide antibiotic, streptogramin antibiotic, tetracycline antibiotic, oxazolidinone antibiotic, phenicol antibiotic, pleuromutilin antibiotic	3001317, 0000000, 0000017, 0000026, 3000050, 3000079, 3000387, 3000670	3000185	3004730	4	0	0	0	0	0	0	0	0	0	0	0	0	0	0	0	0	0	0	0	0	2	26.5588	0	0	1	0.931368	0	0	0	0	0	0	5	11.3383	0	0	0	0	0	0	0	0	0
CARD_102187_TM_#06	antibiotic target protection protein; tva(A)	pleuromutilin, macrolide antibiotic, lincosamide antibiotic, streptogramin antibiotic, tetracycline antibiotic, oxazolidinone antibiotic, phenicol antibiotic, pleuromutilin antibiotic	3001317, 0000000, 0000017, 0000026, 3000050, 3000079, 3000387, 3000670	3000185	3004730	4	0	0	0	0	0	0	0	0	0	0	0	0	0	0	0	0	0	0	0	0	2	8.85294	0	0	12	6.48019	4	11.6015	0	0	0	0	15	20.7749	0	0	0	0	0	0	0	0	0
CARD_102187_TM_#10	antibiotic target protection protein; tva(A)	pleuromutilin, macrolide antibiotic, lincosamide antibiotic, streptogramin antibiotic, tetracycline antibiotic, oxazolidinone antibiotic, phenicol antibiotic, pleuromutilin antibiotic	3001317, 0000000, 0000017, 0000026, 3000050, 3000079, 3000387, 3000670	3000185	3004730	4	0	0	0	0	0	0	0	0	0	0	0	0	0	0	0	0	0	0	0	0	16	54.1294	0	0	2	0.683003	1	1.54771	0	0	0	0	113	117.196	0	0	0	0	0	0	0	0	0
CARD_102187_TM_#18	antibiotic target protection protein; tva(A)	pleuromutilin, macrolide antibiotic, lincosamide antibiotic, streptogramin antibiotic, tetracycline antibiotic, oxazolidinone antibiotic, phenicol antibiotic, pleuromutilin antibiotic	3001317, 0000000, 0000017, 0000026, 3000050, 3000079, 3000387, 3000670	3000185	3004730	4	0	0	0	0	0	0	0	0	0	0	0	0	0	0	0	0	0	0	0	0	10	36.3936	0	0	0	0	0	0	0	0	0	0	63	69.0713	0	0	0	0	0	0	0	0	0
RESF_302610_TM_#01	antibiotic target protection protein; vgaA	pristinamycin IIA, madumycin II, griseoviridin, dalfopristin, pleuromutilin	3000669, 3000672, 3000673, 3000674, 3001317	3000185	3002829	5	0	0	0	0	0	0	2	0.0570025	0	0	0	0	0	0	0	0	0	0	0	0	0	0	0	0	0	0	0	0	0	0	0	0	0	0	0	0	0	0	0	0	0	0	1
RESF_302534_TM_#03	antibiotic target protection protein; vgaALC	pristinamycin IIA, madumycin II, griseoviridin, dalfopristin, pleuromutilin	3000669, 3000672, 3000673, 3000674, 3001317	3000185	3002830	5	0	0	0	0	0	0	2	0.562717	0	0	0	0	0	0	0	0	0	0	0	0	0	0	0	0	9	2.85171	0	0	0	0	0	0	0	0	0	0	0	0	0	0	22	6.10423	0
CARD_101958_TM_#01	antibiotic target protection protein; vgaC	pristinamycin IIA, madumycin II, griseoviridin, dalfopristin, pleuromutilin	3000669, 3000672, 3000673, 3000674, 3001317	3000185	3002831	5	0	0	0	0	0	0	0	0	0	0	0	0	0	0	0	0	0	0	0	0	0	0	0	0	0	0	0	0	0	0	13	1.96157	2866	275.257	0	0	0	0	0	0	0	0	0
CARD_101529_TM_#14	antibiotic target protection protein; vgaE	pristinamycin IIA, madumycin II, griseoviridin, dalfopristin, pleuromutilin	3000669, 3000672, 3000673, 3000674, 3001317	3000185	3002833	5	0	0	0	0	0	0	3	1.4552	0	0	0	0	0	0	0	0	0	0	0	0	0	0	0	0	0	0	0	0	0	0	0	0	0	0	0	0	0	0	0	0	0	0	0
CARD_102484_TM_#01	antibiotic target protection protein; vmlR	lincomycin, virginiamycin S2, macrolide antibiotic, lincosamide antibiotic, streptogramin antibiotic, tetracycline antibiotic, oxazolidinone antibiotic, phenicol antibiotic, pleuromutilin antibiotic	0000046, 3000677, 0000000, 0000017, 0000026, 3000050, 3000079, 3000387, 3000670	3000185	3004476	4	0	0	28	9.37449	0	0	2	0.0573751	0	0	0	0	0	0	0	0	0	0	8	0.36383	0	0	0	0	0	0	0	0	0	0	0	0	0	0	0	0	0	0	0	0	0	0	0
NCBI_200237_TM_#01	antibiotic target replacement protein; dfrA1	trimethoprim, diaminopyrimidine antibiotic	3000188, 3000171	3000381	3002854	5	0	0	9	86.7259	239	541.714	0	0	0	0	8	6.76724	14	10.0806	0	0	0	0	0	0	0	0	0	0	0	0	0	0	362	544.285	155	560.865	1	2.75437	0	0	189	43.9619	0	0	0	0	44
NCBI_200237_TM_#03	antibiotic target replacement protein; dfrA1	trimethoprim, diaminopyrimidine antibiotic	3000188, 3000171	3000381	3002854	5	0	0	13	53.7252	320	376.36	0	0	0	0	3	1.48195	21	9.05568	0	0	0	0	0	0	0	0	0	0	0	0	0	0	331	286.892	212	321.408	2	6.19734	0	0	39	4.90601	0	0	0	0	0
NCBI_200234_TM_#01	antibiotic target replacement protein; dfrA1	trimethoprim, diaminopyrimidine antibiotic	3000188, 3000171	3000381	3002854	5	0	0	170	101.585	426	82.0062	0	0	0	0	18	1.27663	44	3.56055	0	0	0	0	0	0	0	0	0	0	0	0	34	10.5458	607	83.1452	860	231.26	34	5.68982	0	0	612	11.5548	1	0.0598649	0	0	46
CARD_101407_TM_#01	antibiotic target replacement protein; dfrA10	trimethoprim, diaminopyrimidine antibiotic	3000188, 3000171	3000381	3003011	5	0	0	0	0	0	0	0	0	0	0	0	0	6	0.498315	0	0	0	0	0	0	0	0	0	0	0	0	0	0	0	0	0	0	0	0	0	0	0	0	0	0	0	0	0
RESF_303114_TM_#02	antibiotic target replacement protein; dfrA12	trimethoprim, diaminopyrimidine antibiotic	3000188, 3000171	3000381	3002858	5	0	0	0	0	0	0	0	0	0	0	0	0	204	88.5541	0	0	0	0	0	0	0	0	0	0	0	0	0	0	0	0	24	29.9002	0	0	0	0	0	0	0	0	0	0	4
RESF_303114_TM_#06	antibiotic target replacement protein; dfrA12	trimethoprim, diaminopyrimidine antibiotic	3000188, 3000171	3000381	3002858	5	0	0	0	0	0	0	0	0	0	0	0	0	315	144.254	0	0	0	0	2	0.760644	0	0	14	85.6253	0	0	14	20.9853	0	0	63	78.2501	152	145.381	0	0	0	0	0	0	0	0	0
RESF_303114_TM_#07	antibiotic target replacement protein; dfrA12	trimethoprim, diaminopyrimidine antibiotic	3000188, 3000171	3000381	3002858	5	0	0	0	0	0	0	0	0	0	0	0	0	264	123.697	0	0	0	0	0	0	0	0	0	0	0	0	3	4.80325	0	0	56	74.3468	160	157.189	0	0	6	0.566575	0	0	0	0	1
RESF_303128_TM_#01	antibiotic target replacement protein; dfrA13	trimethoprim, diaminopyrimidine antibiotic	3000188, 3000171	3000381	3003012	5	0	0	0	0	0	0	0	0	0	0	0	0	242	118.029	0	0	0	0	0	0	0	0	0	0	0	0	0	0	0	0	20	28.5015	142	166.731	0	0	0	0	0	0	0	0	3
RESF_303128_TM_#03	antibiotic target replacement protein; dfrA13	trimethoprim, diaminopyrimidine antibiotic	3000188, 3000171	3000381	3003012	5	0	0	0	0	0	0	0	0	0	0	0	0	2	1.76902	0	0	0	0	0	0	0	0	0	0	0	0	0	0	0	0	0	0	2	3.03543	0	0	0	0	0	0	0	0	0
NCBI_200253_TM_#02	antibiotic target replacement protein; dfrA16	trimethoprim, diaminopyrimidine antibiotic	3000188, 3000171	3000381	3003014	5	0	0	0	0	4	4.22952	0	0	0	0	0	0	0	0	0	0	0	0	0	0	0	0	0	0	0	0	0	0	1	0.80309	0	0	0	0	0	0	0	0	0	0	0	0	0
NCBI_203492_TM_#02	antibiotic target replacement protein; dfrA17	trimethoprim, diaminopyrimidine antibiotic	3000188, 3000171	3000381	3002860	5	0	0	0	0	0	0	0	0	0	0	0	0	3	3.34721	0	0	0	0	0	0	0	0	0	0	0	0	0	0	0	0	0	0	0	0	0	0	0	0	0	0	0	0	0
CARD_100562_TM_#01	antibiotic target replacement protein; dfrA20	trimethoprim, diaminopyrimidine antibiotic	3000188, 3000171	3000381	3003016	5	103	3.53414	0	0	0	0	0	0	0	0	0	0	0	0	0	0	0	0	0	0	0	0	0	0	736	58.7434	0	0	0	0	117	35.942	10	1.9802	0	0	0	0	0	0	0	0	0
CARD_100742_TM_#01	antibiotic target replacement protein; dfrA23	trimethoprim, diaminopyrimidine antibiotic	3000188, 3000171	3000381	3003019	5	0	0	0	0	0	0	0	0	0	0	0	0	0	0	0	0	0	0	0	0	0	0	0	0	0	0	0	0	0	0	0	0	0	0	0	0	1	0.0194216	0	0	0	0	0
CARD_102593_TM_#01	antibiotic target replacement protein; dfrA27	trimethoprim, diaminopyrimidine antibiotic	3000188, 3000171	3000381	3004550	5	0	0	0	0	14	11.0627	0	0	0	0	0	0	0	0	0	0	0	0	0	0	0	0	0	0	0	0	0	0	45	21.3199	16	18.8509	0	0	0	0	0	0	0	0	0	0	0
CARD_100480_TM_#01	antibiotic target replacement protein; dfrA3	trimethoprim, diaminopyrimidine antibiotic	3000188, 3000171	3000381	3003105	5	0	0	0	0	0	0	2	0.118307	2192	207.289	2	0.157447	1313	127.623	1	0.0639353	474	34.0929	0	0	0	0	0	0	0	0	0	0	0	0	0	0	9153	1886.79	0	0	14	0.32249	86	5.86065	135	8.20543	121
CARD_102074_TM_#01	antibiotic target replacement protein; dfrA6 from Proteus mirabilis	trimethoprim, diaminopyrimidine antibiotic	3000188, 3000171	3000381	3004644	5	0	0	2309	7949.89	772	814.21	0	0	0	0	0	0	0	0	0	0	0	0	0	0	0	0	0	0	0	0	591	1069.71	1331	1130.82	0	0	0	0	0	0	6	0.808066	0	0	0	0	20
CARD_102074_TM_#03	antibiotic target replacement protein; dfrA6 from Proteus mirabilis	trimethoprim, diaminopyrimidine antibiotic	3000188, 3000171	3000381	3004644	5	0	0	1673	6096	828	1014.82	0	0	0	0	0	0	0	0	0	0	0	0	0	0	0	0	0	0	0	0	546	1211.26	1300	1321.04	0	0	0	0	0	0	2	0.219076	0	0	0	0	0
CARD_102074_TM_#05	antibiotic target replacement protein; dfrA6 from Proteus mirabilis	trimethoprim, diaminopyrimidine antibiotic	3000188, 3000171	3000381	3004644	5	0	0	1973	6484.69	918	948.141	0	0	0	0	0	0	0	0	0	0	0	0	0	0	0	0	0	0	0	0	1004	1677.57	1682	1339.96	0	0	0	0	0	0	1	0.0944292	0	0	0	0	0
CARD_102074_TM_#06	antibiotic target replacement protein; dfrA6 from Proteus mirabilis	trimethoprim, diaminopyrimidine antibiotic	3000188, 3000171	3000381	3004644	5	0	0	2435	7896.25	835	846.672	0	0	0	0	0	0	0	0	0	0	0	0	0	0	0	0	0	0	0	0	893	1660.24	2010	1761.51	0	0	0	0	0	0	9	0.836175	0	0	0	0	0
NCBI_203854_TM_#01	antibiotic target replacement protein; dfrA7	trimethoprim, diaminopyrimidine antibiotic	3000188, 3000171	3000381	3002862	5	0	0	0	0	23	5.36665	0	0	0	0	0	0	0	0	0	0	0	0	0	0	0	0	0	0	0	0	0	0	0	0	0	0	4	0.885334	0	0	20	0.451429	0	0	0	0	0
CARD_101859_TM_#01	antibiotic target replacement protein; dfrB3	trimethoprim, diaminopyrimidine antibiotic	3000188, 3000171	3000381	3003022	5	0	0	0	0	10	9.29188	0	0	0	0	7	2.68682	5	1.96557	1	0.249348	0	0	0	0	0	0	0	0	0	0	0	0	0	0	0	0	164	154.777	0	0	0	0	348	115.139	10	2.64082	0
CARD_101859_TM_#02	antibiotic target replacement protein; dfrB3	trimethoprim, diaminopyrimidine antibiotic	3000188, 3000171	3000381	3003022	5	0	0	0	0	16	23.4741	0	0	0	0	8	4.30908	4	2.48283	0	0	0	0	0	0	0	0	0	0	0	0	14	34.3451	0	0	0	0	107	205.554	0	0	0	0	103	82.4105	0	0	0
RESF_303067_TM_#01	antibiotic target replacement protein; dfrB4	trimethoprim, diaminopyrimidine antibiotic	3000188, 3000171	3000381	3004498	5	0	0	0	0	7	7.79642	0	0	0	0	0	0	0	0	0	0	0	0	0	0	0	0	0	0	0	0	0	0	2	1.60618	0	0	0	0	0	0	0	0	0	0	0	0	0
RESF_303067_TM_#02	antibiotic target replacement protein; dfrB4	trimethoprim, diaminopyrimidine antibiotic	3000188, 3000171	3000381	3004498	5	0	0	0	0	0	0	0	0	0	0	0	0	0	0	0	0	0	0	0	0	0	0	0	0	0	0	0	0	0	0	0	0	0	0	0	0	0	0	7	5.19443	0	0	0
CARD_102598_TM_#02	antibiotic target replacement protein; dfrB6	trimethoprim, diaminopyrimidine antibiotic	3000188, 3000171	3000381	3003023	5	0	0	0	0	19	25.1925	0	0	0	0	8	3.89869	4	2.24637	1	0.356211	0	0	0	0	0	0	0	0	2	0.975719	14	31.0624	0	0	0	0	131	193.851	0	0	0	0	126	94.689	0	0	0
CARD_102946_TM_#01	antibiotic target replacement protein; DfrB9	trimethoprim, diaminopyrimidine antibiotic	3000188, 3000171	3000381	3005350	5	0	0	0	0	0	0	0	0	0	0	2	0.620247	2	0.714754	0	0	0	0	0	0	0	0	0	0	0	0	0	0	0	0	0	0	13	9.72043	0	0	0	0	61	14.1319	0	0	0
CARD_101310_TM_#01	antibiotic target replacement protein; dfrC	trimethoprim, diaminopyrimidine antibiotic	3000188, 3000171	3000381	3002865	5	18	0.609716	0	0	0	0	0	0	0	0	0	0	0	0	0	0	0	0	0	0	0	0	26	22.3881	1	0.0883194	0	0	0	0	0	0	0	0	0	0	0	0	0	0	0	0	0
ARGA_401790_TM_#01	antibiotic target replacement protein; dfrD	trimethoprim, diaminopyrimidine antibiotic	3000188, 3000171	3000381	3002866	5	16	0.59468	0	0	0	0	0	0	0	0	0	0	0	0	0	0	0	0	14	1.42293	0	0	27	23.2517	14	1.09869	0	0	0	0	38	12.0628	73	14.913	0	0	0	0	1	0.0727668	0	0	12
CARD_101451_TM_#01	antibiotic target replacement protein; dfrE	trimethoprim, diaminopyrimidine antibiotic	3000188, 3000171	3000381	3002875	5	0	0	0	0	0	0	0	0	361	33.4927	60	5.04562	13559	1301.75	2	0.125722	0	0	2	0.198151	233	160.669	0	0	0	0	0	0	4	0.590507	0	0	0	0	74	68.5082	267	5.99198	2	0.141865	102	6.07958	6
CARD_100003_TM_#01	antibiotic target replacement protein; dfrF	trimethoprim, diaminopyrimidine antibiotic	3000188, 3000171	3000381	3002867	5	2	0.0720573	0	0	0	0	31	1.87419	0	0	0	0	10	0.882303	0	0	0	0	0	0	0	0	0	0	0	0	0	0	0	0	0	0	0	0	0	0	0	0	0	0	0	0	0
CARD_100417_TM_#09	antibiotic target replacement protein; dfrG	trimethoprim, diaminopyrimidine antibiotic	3000188, 3000171	3000381	3002868	5	0	0	0	0	0	0	0	0	0	0	0	0	52	21.9775	0	0	0	0	0	0	4	9.89447	0	0	0	0	0	0	0	0	2	2.26336	3	2.1873	18	61.181	0	0	0	0	0	0	45
CARD_102075_TM_#01	antibiotic target replacement protein; dfrI	trimethoprim, diaminopyrimidine antibiotic	3000188, 3000171	3000381	3004645	5	0	0	0	0	2	0.38143	0	0	0	0	0	0	0	0	0	0	0	0	0	0	0	0	0	0	0	0	0	0	0	0	0	0	0	0	0	0	0	0	0	0	0	0	0
NCBI_200343_TM_#06	antibiotic target replacement protein; mecA	methicillin, penam	0000015, 3000008	3000381	3000617	4	0	0	0	0	0	0	0	0	0	0	7	3.98508	12	6.44104	6	1.49609	0	0	0	0	0	0	0	0	0	0	0	0	0	0	0	0	0	0	2	11.9929	0	0	0	0	6	1.44365	1
NCBI_200343_TM_#09	antibiotic target replacement protein; mecA	methicillin, penam	0000015, 3000008	3000381	3000617	4	0	0	0	0	0	0	0	0	0	0	1	0.341136	0	0	0	0	0	0	0	0	0	0	0	0	0	0	44	68.1168	0	0	0	0	0	0	2	9.11462	0	0	1	0.281365	0	0	0
NCBI_200343_TM_#11	antibiotic target replacement protein; mecA	methicillin, penam	0000015, 3000008	3000381	3000617	4	0	0	0	0	0	0	0	0	0	0	8	5.83193	20	71.5469	0	0	0	0	0	0	0	0	0	0	0	0	0	0	0	0	0	0	0	0	2	11.7861	26	3.87706	0	0	13	4.89151	0
NCBI_200343_TM_#12	antibiotic target replacement protein; mecA	methicillin, penam	0000015, 3000008	3000381	3000617	4	0	0	0	0	0	0	0	0	0	0	11	4.16944	7	4.84842	0	0	0	0	0	0	0	0	0	0	0	0	0	0	0	0	0	0	0	0	7	29.5909	5	0.50712	0	0	0	0	0
RESF_301691_TM_#03	antibiotic target replacement protein; mecA	methicillin, penam	0000015, 3000008	3000381	3000617	4	0	0	0	0	0	0	0	0	0	0	13	7.69835	0	0	0	0	0	0	0	0	0	0	0	0	0	0	0	0	0	0	0	0	0	0	3	18.5826	19	3.46564	0	0	1	0.328102	0
RESF_301691_TM_#05	antibiotic target replacement protein; mecA	methicillin, penam	0000015, 3000008	3000381	3000617	4	0	0	0	0	0	0	0	0	0	0	32	10.7117	7	2.58757	0	0	0	0	0	0	0	0	0	0	0	0	0	0	0	0	0	0	0	0	21	81.0569	6	0.513459	0	0	4	0.902281	0
RESF_301691_TM_#06	antibiotic target replacement protein; mecA	methicillin, penam	0000015, 3000008	3000381	3000617	4	0	0	0	0	0	0	0	0	0	0	2	0.660262	17	7.1657	2	0.510029	0	0	0	0	0	0	0	0	0	0	0	0	0	0	0	0	0	0	2	7.3505	4	0.405696	0	0	0	0	0
RESF_301691_TM_#07	antibiotic target replacement protein; mecA	methicillin, penam	0000015, 3000008	3000381	3000617	4	0	0	0	0	0	0	0	0	0	0	8	11.2575	1	0.589672	6	2.24413	0	0	0	0	0	0	0	0	0	0	0	0	0	0	0	0	0	0	2	25.3184	2	0.273845	0	0	6	2.16547	0
RESF_301691_TM_#09	antibiotic target replacement protein; mecA	methicillin, penam	0000015, 3000008	3000381	3000617	4	0	0	0	0	0	0	0	0	0	0	9	2.97118	5	1.90217	1	0.241304	0	0	0	0	0	0	0	0	21	6.94746	0	0	0	0	0	0	0	0	7	25.7268	6	0.648462	0	0	3	0.69854	0
RESF_301691_TM_#10	antibiotic target replacement protein; mecA	methicillin, penam	0000015, 3000008	3000381	3000617	4	0	0	0	0	0	0	0	0	0	0	11	4.84014	19	6.80118	1	0.22668	0	0	4	3.53699	0	0	0	0	0	0	0	0	0	0	0	0	0	0	4	13.81	20	2.16045	0	0	6	1.31241	0
RESF_301691_TM_#12	antibiotic target replacement protein; mecA	methicillin, penam	0000015, 3000008	3000381	3000617	4	0	0	0	0	0	0	0	0	0	0	6	5.8078	0	0	0	0	0	0	0	0	0	0	0	0	0	0	0	0	0	0	0	0	0	0	0	0	1	0.456408	0	0	0	0	0
RESF_301691_TM_#16	antibiotic target replacement protein; mecA	methicillin, penam	0000015, 3000008	3000381	3000617	4	0	0	0	0	0	0	0	0	0	0	27	12.6751	2	0.842389	0	0	0	0	0	0	0	0	0	0	0	0	0	0	0	0	0	0	0	0	2	8.13806	3	0.293405	0	0	6	1.54677	0
RESF_302858_TM_#01	antibiotic target replacement protein; sul1	sulfadiazine, sulfadimidine, sulfadoxine, sulfamethoxazole, sulfisoxazole, sulfacetamide, mafenide, sulfasalazine, sulfamethizole, sulfonamide antibiotic	3000324, 3000325, 3000327, 3000329, 3000330, 3000683, 3000684, 3000698, 3000699, 3000282	3000381	3000410	4	12	0.487411	354	318.5	0	0	166	12.1114	11	1.304	201	21.1551	8077	962.241	7	0.507143	60	5.22489	51	6.08415	49	42.1355	196	199.48	1387	141.564	378	180.838	60	12.2356	2227	870.698	421	104.231	17	18.8236	618	17.082	802	68.0109	463	33.8173	63
RESF_302858_TM_#02	antibiotic target replacement protein; sul1	sulfadiazine, sulfadimidine, sulfadoxine, sulfamethoxazole, sulfisoxazole, sulfacetamide, mafenide, sulfasalazine, sulfamethizole, sulfonamide antibiotic	3000324, 3000325, 3000327, 3000329, 3000330, 3000683, 3000684, 3000698, 3000699, 3000282	3000381	3000410	4	0	0	162	1354.01	0	0	17	13.4109	0	0	22	21.9613	544	815.506	0	0	7	7.60364	0	0	4	43.0072	14	175.904	114	133.879	39	227.385	0	0	170	822.133	29	111.188	3	42.7248	53	21.923	50	55.4915	15	13.5342	0
RESF_302858_TM_#03	antibiotic target replacement protein; sul1	sulfadiazine, sulfadimidine, sulfadoxine, sulfamethoxazole, sulfisoxazole, sulfacetamide, mafenide, sulfasalazine, sulfamethizole, sulfonamide antibiotic	3000324, 3000325, 3000327, 3000329, 3000330, 3000683, 3000684, 3000698, 3000699, 3000282	3000381	3000410	4	0	0	131	631.539	0	0	32	15.9241	0	0	16	9.10768	945	701.877	3	2.90906	2	2.00535	18	35.6443	1	4.67239	51	283.353	215	126.09	88	227.342	11	14.6718	258	667.343	36	51.3575	1	6.3296	76	11.6891	128	71.0412	38	16.6931	13
RESF_302884_TM_#01	antibiotic target replacement protein; sul2	sulfadiazine, sulfadimidine, sulfadoxine, sulfamethoxazole, sulfisoxazole, sulfacetamide, mafenide, sulfasalazine, sulfamethizole, sulfonamide antibiotic	3000324, 3000325, 3000327, 3000329, 3000330, 3000683, 3000684, 3000698, 3000699, 3000282	3000381	3000412	4	8	2.60981	0	0	54	109.244	0	0	0	0	10	7.63093	133	123.53	0	0	16	10.9249	0	0	0	0	401	2951.64	64	53.3816	0	0	0	0	368	1048.29	33	63.3752	0	0	37	7.97035	6	4.34106	0	0	14
RESF_302884_TM_#03	antibiotic target replacement protein; sul2	sulfadiazine, sulfadimidine, sulfadoxine, sulfamethoxazole, sulfisoxazole, sulfacetamide, mafenide, sulfasalazine, sulfamethizole, sulfonamide antibiotic	3000324, 3000325, 3000327, 3000329, 3000330, 3000683, 3000684, 3000698, 3000699, 3000282	3000381	3000412	4	26	7.12146	793	5317.18	3203	6427.9	0	0	438	321.083	144	97.8075	2725	2500.28	0	0	596	394.387	0	0	90	470.373	15843	109637	708	501.325	37	114.439	0	0	11098	29152	215	440.118	0	0	1430	284.445	77	50.7125	30	12.7381	863
RESF_302884_TM_#04	antibiotic target replacement protein; sul2	sulfadiazine, sulfadimidine, sulfadoxine, sulfamethoxazole, sulfisoxazole, sulfacetamide, mafenide, sulfasalazine, sulfamethizole, sulfonamide antibiotic	3000324, 3000325, 3000327, 3000329, 3000330, 3000683, 3000684, 3000698, 3000699, 3000282	3000381	3000412	4	149	22.4136	1637	5237.31	5834	5906.24	13	3.41519	943	389.066	358	134.428	5202	2350.03	6	1.8029	1086	359.54	1	0.406551	198	631.723	33507	126635	1995	879.059	36	66.3488	0	0	24805	35296	379	356.283	0	0	2392	253.397	132	42.3175	40	12.0152	1590
RESF_302884_TM_#07	antibiotic target replacement protein; sul2	sulfadiazine, sulfadimidine, sulfadoxine, sulfamethoxazole, sulfisoxazole, sulfacetamide, mafenide, sulfasalazine, sulfamethizole, sulfonamide antibiotic	3000324, 3000325, 3000327, 3000329, 3000330, 3000683, 3000684, 3000698, 3000699, 3000282	3000381	3000412	4	47	12.4404	860	7435.28	3571	6322.46	2	0.860626	677	549.411	131	115.59	3189	2934.35	6	3.87222	583	357.508	0	0	89	522.688	19264	146544	494	313.952	17	46.4314	3	3.54304	16084	44796.8	224	449.051	0	0	1302	255.093	124	72.8711	0	0	761
RESF_302884_TM_#12	antibiotic target replacement protein; sul2	sulfadiazine, sulfadimidine, sulfadoxine, sulfamethoxazole, sulfisoxazole, sulfacetamide, mafenide, sulfasalazine, sulfamethizole, sulfonamide antibiotic	3000324, 3000325, 3000327, 3000329, 3000330, 3000683, 3000684, 3000698, 3000699, 3000282	3000381	3000412	4	171	28.7565	1214	4186.03	5614	6367.96	1	0.270938	917	437.65	336	142.215	6348	3268.68	1	0.277053	1124	400.766	0	0	127	497.838	40009	171626	1106	433.152	98	260.436	1	0.743602	25650	42020.2	466	499.726	0	0	2628	320.306	181	83.0861	68	19.8167	1731
RESF_302884_TM_#06	antibiotic target replacement protein; sul2	sulfadiazine, sulfadimidine, sulfadoxine, sulfamethoxazole, sulfisoxazole, sulfacetamide, mafenide, sulfasalazine, sulfamethizole, sulfonamide antibiotic	3000324, 3000325, 3000327, 3000329, 3000330, 3000683, 3000684, 3000698, 3000699, 3000282	3000381	3000412	4	0	0	0	0	21	23.3893	0	0	0	0	0	0	4	1.88695	0	0	1	0.347595	0	0	0	0	32	163.132	0	0	0	0	0	0	37	59.977	2	1.98315	0	0	1	0.144129	0	0	0	0	6
CARD_100369_TM_#01	antibiotic target replacement protein; sul3	sulfadiazine, sulfadimidine, sulfadoxine, sulfamethoxazole, sulfisoxazole, sulfacetamide, mafenide, sulfasalazine, sulfamethizole, sulfonamide antibiotic	3000324, 3000325, 3000327, 3000329, 3000330, 3000683, 3000684, 3000698, 3000699, 3000282	3000381	3000413	4	0	0	0	0	0	0	0	0	0	0	0	0	0	0	0	0	0	0	0	0	0	0	0	0	0	0	0	0	0	0	0	0	0	0	0	0	70	0.869009	0	0	0	0	0
CARD_102390_TM_#01	antibiotic target replacement protein; sul4	sulfonamide antibiotic	3000282	3000381	3004361	4	0	0	0	0	0	0	0	0	0	0	0	0	0	0	0	0	0	0	0	0	0	0	0	0	0	0	0	0	4	0.331855	0	0	2	0.202087	0	0	0	0	2	0.0697599	0	0	0
RESF_303061_TM_#02	antibiotic target replacement protein; trimethoprim resistant dihydrofolate reductase dfr	trimethoprim, diaminopyrimidine antibiotic	3000188, 3000171	3000381	3001218	4	0	0	43	333.074	327	408.041	0	0	0	0	12	6.72029	6	2.83043	0	0	0	0	0	0	0	0	0	0	0	0	0	0	301	327.514	150	244.02	9	9.33247	0	0	511	66.6929	1	0.337638	0	0	66
NCBI_204004_TM_#02	antibiotic target replacement protein; trimethoprim resistant dihydrofolate reductase dfr	trimethoprim, diaminopyrimidine antibiotic	3000188, 3000171	3000381	3001218	4	0	0	0	0	14	3.95281	0	0	0	0	0	0	0	0	0	0	0	0	0	0	0	0	0	0	0	0	0	0	3	0.553205	16	6.3027	0	0	0	0	39	1.09764	0	0	0	0	18
RESF_303061_TM_#03	antibiotic target replacement protein; trimethoprim resistant dihydrofolate reductase dfr	trimethoprim, diaminopyrimidine antibiotic	3000188, 3000171	3000381	3001218	4	0	0	0	0	0	0	0	0	0	0	2	0.731005	0	0	0	0	0	0	0	0	0	0	0	0	0	0	0	0	0	0	0	0	0	0	0	0	388	44.0436	0	0	0	0	52
CARD_102102_TM_#01	efflux pump complex or subunit conferring antibiotic resistance; abcA	methicillin, daptomycin, cefotaxime, moenomycin A1	0000015, 0000068, 3000645, 3000697	3000159	3003942	4	0	0	0	0	0	0	0	0	0	0	0	0	0	0	0	0	0	0	0	0	0	0	0	0	0	0	0	0	0	0	0	0	0	0	0	0	0	0	2	0.0662035	0	0	0
CARD_101283_TM_#01	efflux pump complex or subunit conferring antibiotic resistance; abeM	ciprofloxacin, acriflavine, norfloxacin, ofloxacin, fluoroquinolone antibiotic, triclosan	0000036, 0000045, 3000662, 3000663, 0000001, 3000870	3000159	3000753	4	0	0	0	0	4	0.426847	0	0	457	20.0782	24	0.916835	357	16.4006	5	0.145621	14	0.473225	0	0	0	0	0	0	0	0	0	0	0	0	17	2.46353	11	1.0251	8	3.55577	5886	62.4482	343	11.2551	18	0.50377	4776
CARD_100555_TM_#01	efflux pump complex or subunit conferring antibiotic resistance; abeS	erythromycin, novobiocin	0000006, 3000111	3000159	3000768	4	0	0	0	0	0	0	0	0	64	10.8085	0	0	126	22.5102	0	0	2	0.258115	0	0	0	0	0	0	0	0	0	0	0	0	0	0	0	0	0	0	1210	49.3136	21	2.62946	13	1.31762	1614
CARD_102603_TM_#01	efflux pump complex or subunit conferring antibiotic resistance; Acinetobacter baumannii AbaF	fosfomycin	25	3000159	3004573	4	0	0	0	0	0	0	0	0	603	26.435	0	0	414	18.9378	0	0	0	0	0	0	0	0	0	0	0	0	0	0	0	0	0	0	0	0	23	10.0148	2090	22.1376	163	5.32424	22	0.622751	2504
CARD_102604_TM_#01	efflux pump complex or subunit conferring antibiotic resistance; Acinetobacter baumannii AbaQ	fluoroquinolone antibiotic	1	3000159	3004574	4	18	0.304314	0	0	13	1.41002	0	0	19	0.837809	0	0	1191	54.2589	1	0.029335	0	0	0	0	0	0	0	0	2	0.0803009	0	0	0	0	889	133.109	0	0	7	3.10148	7144	75.7178	48	1.55585	2	0.0566137	1218
CARD_102605_TM_#01	efflux pump complex or subunit conferring antibiotic resistance; Acinetobacter baumannii AmvA	erythromycin, acriflavine	0000006, 0000045	3000159	3004577	4	0	0	0	0	0	0	0	0	346	15.1834	0	0	886	40.5185	4	0.11636	0	0	0	0	0	0	0	0	0	0	0	0	0	0	0	0	0	0	11	4.874	8926	94.5911	137	4.50412	14	0.396259	10158
CARD_102246_TM_#01	efflux pump complex or subunit conferring antibiotic resistance; acrA	antibiotic molecule	1000003	3000159	3000207	4	106	19.6804	0	0	2984	3213.59	640	195.148	8195	3696.8	13535	5969.98	17894	8925.6	486	138.302	1404	502.482	682	339.96	95	331.559	7	24.1129	253	146.645	822	2049.28	9792	8060.16	509	769.914	217	219.218	4344	20145.6	226063	26173.8	3435	1216.48	3805	1068.9	72827
CARD_102246_TM_#03	efflux pump complex or subunit conferring antibiotic resistance; acrA	antibiotic molecule	1000003	3000159	3000207	4	54	7.89807	0	0	61	56.6377	574	158.207	6650	2638.65	11154	4310.73	16137	7371.25	644	173.341	1373	443.05	788	310.653	77	263.498	11	36.6286	285	97.5586	482	885.444	5698	4288.37	518	717.044	77	67.2588	4725	19813.4	181518	19010.1	2527	777.188	978	262.9	54040
CARD_102246_TM_#08	efflux pump complex or subunit conferring antibiotic resistance; acrA	antibiotic molecule	1000003	3000159	3000207	4	60	12.325	0	0	187	259.033	395	148.513	4112	2466.17	7635	4378.29	10022	6966.16	473	224.705	1149	564.613	561	316.153	58	247.868	11	52.3266	169	99.6336	732	2615.78	2378	2862.66	290	565.358	56	66.911	2523	16757.1	115319	17566.5	2101	1056.25	1464	551.988	34974
CARD_102246_TM_#10	efflux pump complex or subunit conferring antibiotic resistance; acrA	antibiotic molecule	1000003	3000159	3000207	4	37	21.0141	0	0	36	156.838	226	279.14	2433	4669.55	3453	4906.68	4093	6903.21	142	170.965	554	745.258	597	1163.59	49	819.271	0	0	51	54.6122	210	1297.02	865	2669.12	96	570.503	38	80.761	1265	21796.7	45187	18771.6	604	828.446	290	370.994	12705
CARD_102246_TM_#11	efflux pump complex or subunit conferring antibiotic resistance; acrA	antibiotic molecule	1000003	3000159	3000207	4	70	14.6769	0	0	149	183.57	732	261.981	3145	1652.32	11156	5885.22	14405	8822.95	479	166.165	1193	550.816	3	1.56843	80	496.937	0	0	216	100.724	795	1636.97	3549	3692.33	501	906.65	44	56.5995	3851	21801.8	125444	17417.5	2304	951.877	7456	2654.13	40869
CARD_101036_TM_#01	efflux pump complex or subunit conferring antibiotic resistance; acrB	antibiotic molecule	1000003	3000159	3000216	4	519	20.0255	0	0	988	259.468	3564	237.703	23702	2506.02	59765	5706.8	69178	7586.59	3058	215.272	7789	628.015	8997	956.687	548	429.314	162	153.262	2350	220.814	1985	863.917	40588	7631.05	1508	548.731	441	100.586	13543	14527.9	789790	20200.4	13207	1039.63	61950	4217.92	254867
CARD_101036_TM_#02	efflux pump complex or subunit conferring antibiotic resistance; acrB	antibiotic molecule	1000003	3000159	3000216	4	10	3.59286	0	0	48	100.753	90	44.1794	1851	1578.86	3867	2781.01	6775	5334.95	370	212.778	533	337.487	2	1.56233	45	252.252	0	0	4	3.41502	169	621.796	3377	4971.02	69	217.743	47	79.7795	493	4334.33	55050	10834.9	933	581.334	1542	869.134	22269
NCBI_204337_TM_#01	efflux pump complex or subunit conferring antibiotic resistance; acrB	antibiotic molecule	1000003	3000159	3000216	4	272	33.4034	0	0	199	179.044	1079	231.774	1874	643.379	1625	481.283	495	183.662	477	109.521	800	215.096	4490	1542.51	222	529.878	68	201.369	1056	323.32	23	30.4578	1224	700.237	0	0	164	113.77	36	128.854	483	41.808	538	137.674	618	139.342	137
NCBI_204337_TM_#02	efflux pump complex or subunit conferring antibiotic resistance; acrB	antibiotic molecule	1000003	3000159	3000216	4	6	0.139579	0	0	67	11.035	34	1.38	54	3.53462	194	11.3868	41	2.7747	13	0.559739	16	0.765537	340	22.7856	0	0	0	0	23	1.29882	0	0	710	82.4697	0	0	2	0.282232	66	43.9494	860	13.5811	37	1.78671	2	0.085423	180
CARD_101036_TM_#04	efflux pump complex or subunit conferring antibiotic resistance; acrB	antibiotic molecule	1000003	3000159	3000216	4	0	0	0	0	4	4.17666	35	12.7298	193	104.072	2440	1277.22	5798	3445.75	8	2.66131	392	172.746	0	0	4	21.0257	0	0	58	36.2563	0	0	0	0	18	43.1885	5	7.71506	5	35.604	42574	6100.23	50	21.6552	164	59.0384	15036
CARD_101036_TM_#03	efflux pump complex or subunit conferring antibiotic resistance; acrB	antibiotic molecule	1000003	3000159	3000216	4	0	0	0	0	0	0	27	11.6185	63	51.1954	1652	1224.73	4008	3751.83	0	0	253	164.191	0	0	0	0	0	0	0	0	0	0	0	0	4	9.05342	12	17.5275	0	0	30995	6115.06	52	34.3438	139	72.1307	13327
CARD_101356_TM_#01	efflux pump complex or subunit conferring antibiotic resistance; AcrE	antibiotic molecule	1000003	3000159	3000499	4	0	0	36	18.0152	0	0	489	20.169	1475	94.5536	28361	1646.19	61554	4109.75	75	3.20895	3961	195.397	1	0.0681502	69	33.0849	0	0	44	2.53248	0	0	19	2.20502	139	30.6162	136	19.2023	81	52.8117	431211	6705.04	583	27.8673	485	20.066	183946
CARD_101356_TM_#02	efflux pump complex or subunit conferring antibiotic resistance; AcrE	antibiotic molecule	1000003	3000159	3000499	4	0	0	0	0	2	7.95553	24	23.2633	64	106.074	1482	2132.36	3598	5919.27	2	2.13727	203	254.486	0	0	0	0	0	0	0	0	0	0	0	0	2	10.9934	0	0	2	32.5522	23786	9350.01	42	45.0073	182	136.232	9774
CARD_101349_TM_#02	efflux pump complex or subunit conferring antibiotic resistance; AcrF	antibiotic molecule	1000003	3000159	3000502	4	0	0	0	0	14	5.21088	166	15.6224	543	80.8941	11014	1477.65	22810	3512.82	17	1.74202	1787	203.341	0	0	2	1.90422	0	0	0	0	0	0	0	0	28	14.7463	31	10.1871	23	33.6834	176875	6364.91	202	22.1833	759	71.5261	74191
CARD_101349_TM_#03	efflux pump complex or subunit conferring antibiotic resistance; AcrF	antibiotic molecule	1000003	3000159	3000502	4	0	0	0	0	4	2.22755	62	12.6277	253	79.3534	1510	434.708	10388	3322.53	14	3.00796	590	135.66	2	0.465394	4	10.1943	0	0	0	0	6	5.56562	14	6.06134	72	78.8809	12	8.19237	9	28.6304	40710	3023.61	78	17.7557	334	65.0831	33155
CARD_101349_TM_#01	efflux pump complex or subunit conferring antibiotic resistance; AcrF	antibiotic molecule	1000003	3000159	3000502	4	0	0	0	0	0	0	11	11.5826	61	92.8653	1273	2021.07	2870	4932.12	8	7.4097	173	245.904	0	0	0	0	0	0	0	0	0	0	0	0	1	6.41284	8	39.4087	2	37.9776	17694	7798.27	14	15.5695	63	72.5503	8400
CARD_101349_TM_#04	efflux pump complex or subunit conferring antibiotic resistance; AcrF	antibiotic molecule	1000003	3000159	3000502	4	0	0	0	0	0	0	35	17.0585	100	70.1291	2902	1570.11	5085	3318.45	0	0	442	209.367	0	0	2	11.2137	0	0	0	0	0	0	0	0	20	51.1354	8	11.5684	2	15.191	47074	7088.66	49	23.6648	129	51.2103	19875
CARD_101237_TM_#01	efflux pump complex or subunit conferring antibiotic resistance; adeA	antibiotic molecule	1000003	3000159	3000774	4	0	0	0	0	0	0	0	0	157	6.85822	0	0	92	4.1998	0	0	0	0	0	0	0	0	0	0	36	1.44631	0	0	4	0.314937	5	0.747514	0	0	14	6.08176	747	7.95209	60	1.94679	8	0.225866	2662
CARD_100816_TM_#02	efflux pump complex or subunit conferring antibiotic resistance; adeB	antibiotic molecule	1000003	3000159	3000775	4	0	0	0	0	0	0	0	0	153	7.63843	0	0	200	10.3559	0	0	0	0	0	0	0	0	0	0	0	0	0	0	0	0	7	1.20215	0	0	8	4.06903	1291	15.5702	58	2.17984	13	0.413232	3485
CARD_100816_TM_#01	efflux pump complex or subunit conferring antibiotic resistance; adeB	antibiotic molecule	1000003	3000159	3000775	4	0	0	0	0	0	0	0	0	0	0	0	0	20	27.9994	0	0	0	0	0	0	0	0	0	0	0	0	0	0	0	0	0	0	0	0	0	0	107	22.6599	1	0.44426	0	0	1
CARD_100315_TM_#01	efflux pump complex or subunit conferring antibiotic resistance; adeC	antibiotic molecule	1000003	3000159	3003811	4	0	0	0	0	0	0	0	0	138	6.02154	0	0	57	2.53442	0	0	0	0	0	0	0	0	0	0	0	0	0	0	0	0	0	0	0	0	6	2.68077	163	1.7141	136	4.46781	0	0	9648
CARD_100138_TM_#01	efflux pump complex or subunit conferring antibiotic resistance; adeF	antibiotic molecule	1000003	3000159	3000777	4	27	0.428312	4	1.28483	21	2.1675	15	0.403359	501	21.829	39	1.47287	2792	127.034	4	0.111371	166	5.326	8	0.369882	0	0	70	26.3924	185	7.16955	70	12.1689	10	0.787343	16	2.29951	355	33.1461	8	3.55588	22415	237.708	928	29.5572	426	11.5453	16624
CARD_101153_TM_#01	efflux pump complex or subunit conferring antibiotic resistance; adeG	antibiotic molecule	1000003	3000159	3000778	4	0	0	0	0	0	0	0	0	119	5.12795	0	0	178	8.13915	0	0	0	0	0	0	0	0	0	0	0	0	0	0	0	0	0	0	0	0	5	2.1141	1523	16.1698	92	3.00167	4	0.112456	2865
CARD_100505_TM_#01	efflux pump complex or subunit conferring antibiotic resistance; adeH	antibiotic molecule	1000003	3000159	3000779	4	0	0	0	0	0	0	4	0.113233	45	1.97678	0	0	89	4.06902	0	0	0	0	0	0	0	0	0	0	58	2.32993	0	0	0	0	0	0	0	0	9	4.01651	1205	12.7729	18	0.593737	28	0.783463	2108
CARD_101383_TM_#01	efflux pump complex or subunit conferring antibiotic resistance; adeI	antibiotic molecule	1000003	3000159	3000780	4	0	0	0	0	9	0.9826	0	0	581	25.3549	0	0	614	27.8219	4	0.114012	6	0.204468	0	0	0	0	23	8.97363	0	0	0	0	0	0	0	0	8	0.766678	0	0	6192	65.5956	160	5.19939	321	8.92815	11117
CARD_100589_TM_#01	efflux pump complex or subunit conferring antibiotic resistance; adeJ	antibiotic molecule	1000003	3000159	3000781	4	24	0.398901	0	0	593	64.5086	0	0	5546	242.818	2468	98.3776	16368	741.944	330	9.60841	822	27.492	0	0	0	0	0	0	645	25.7354	0	0	0	0	3604	541.131	120	11.4808	43	19.0386	22250	234.584	3669	119.34	2774	77.5557	19154
CARD_101567_TM_#01	efflux pump complex or subunit conferring antibiotic resistance; adeK	antibiotic molecule	1000003	3000159	3000782	4	23	0.377348	0	0	353	38.3402	2	0.0573751	2664	115.691	903	35.3568	2310	103.777	236	6.84189	102	3.37601	0	0	0	0	12	4.69794	91	3.48621	0	0	0	0	61	8.89439	1522	144.907	11	4.88907	16857	178.276	622	19.8966	227	6.29847	13330
CARD_102326_TM_#01	efflux pump complex or subunit conferring antibiotic resistance; AxyX	antibiotic molecule	1000003	3000159	3004143	4	0	0	0	0	0	0	0	0	1	0.0420219	0	0	0	0	0	0	0	0	0	0	0	0	0	0	0	0	0	0	0	0	0	0	0	0	0	0	1516	16.1091	1	0.0331018	0	0	0
CARD_102327_TM_#01	efflux pump complex or subunit conferring antibiotic resistance; AxyY	antibiotic molecule	1000003	3000159	3004144	4	0	0	0	0	0	0	0	0	0	0	0	0	0	0	0	0	0	0	0	0	0	0	0	0	0	0	8	1.41573	0	0	0	0	0	0	0	0	5157	54.7117	10	0.326911	0	0	0
CARD_102256_TM_#01	efflux pump complex or subunit conferring antibiotic resistance; bcr-1	bicyclomycin	55	3000159	3003801	4	2	0.0329956	0	0	0	0	0	0	0	0	0	0	0	0	0	0	0	0	0	0	0	0	4	1.49471	0	0	0	0	0	0	0	0	0	0	2	0.89359	8551	90.6726	2	0.0662035	0	0	0
CARD_100323_TM_#01	efflux pump complex or subunit conferring antibiotic resistance; bcrA	bacitracin A, bacitracin B, bacitracin F	3000629, 3000630, 3000631	3000159	3002987	4	0	0	0	0	0	0	10	0.280101	0	0	0	0	0	0	0	0	0	0	0	0	0	0	0	0	0	0	0	0	0	0	0	0	0	0	0	0	0	0	0	0	0	0	0
CARD_100887_TM_#01	efflux pump complex or subunit conferring antibiotic resistance; bcrB	bacitracin A, bacitracin B, bacitracin F	3000629, 3000630, 3000631	3000159	3002988	4	0	0	0	0	0	0	7	0.314155	0	0	0	0	0	0	0	0	0	0	0	0	0	0	0	0	0	0	0	0	0	0	0	0	0	0	0	0	0	0	0	0	0	0	0
CARD_101862_TM_#01	efflux pump complex or subunit conferring antibiotic resistance; blt	acriflavine, fluoroquinolone antibiotic	0000045, 0000001	3000159	3003006	4	0	0	3	1.0203	0	0	2	0.0573751	0	0	0	0	0	0	0	0	0	0	16	0.726317	6	1.8876	0	0	0	0	0	0	0	0	0	0	0	0	0	0	0	0	0	0	0	0	0
CARD_101181_TM_#01	efflux pump complex or subunit conferring antibiotic resistance; bmr	acriflavine, puromycin, chloramphenicol, fluoroquinolone antibiotic	0000045, 0000047, 3000385, 0000001	3000159	3003007	4	0	0	51	17.0429	0	0	0	0	0	0	0	0	0	0	0	0	0	0	0	0	0	0	0	0	16	0.620912	0	0	0	0	0	0	0	0	0	0	0	0	0	0	0	0	0
CARD_101617_TM_#01	efflux pump complex or subunit conferring antibiotic resistance; ceoA	antibiotic molecule	1000003	3000159	3003009	4	2	0.0325801	17	5.56137	3	0.327581	2	0.0539213	0	0	2	0.0756212	19	0.85151	0	0	2	0.0638961	2	0.0924704	0	0	40	14.9504	101	3.83866	0	0	0	0	11	1.57053	0	0	0	0	0	0	14	0.452425	9	0.248562	0
CARD_101177_TM_#01	efflux pump complex or subunit conferring antibiotic resistance; ceoB	antibiotic molecule	1000003	3000159	3003010	4	366	6.03221	650	216.838	328	34.9212	65	1.81364	140	5.87036	131	4.99569	425	19.2745	16	0.465327	81	2.65216	135	6.11118	61	19.6173	3169	1219.36	3235	127.064	1594	280.132	206	15.9624	276	40.8761	194	17.8381	53	23.2819	205	2.14215	391	12.3761	1538	42.2241	210
CARD_101112_TM_#01	efflux pump complex or subunit conferring antibiotic resistance; cmeA	antibiotic molecule	1000003	3000159	3000783	4	0	0	0	0	0	0	0	0	0	0	0	0	0	0	0	0	0	0	0	0	0	0	0	0	0	0	0	0	0	0	0	0	2	0.189473	0	0	0	0	0	0	0	0	0
CARD_100705_TM_#01	efflux pump complex or subunit conferring antibiotic resistance; cmeB	antibiotic molecule	1000003	3000159	3000784	4	0	0	0	0	0	0	0	0	0	0	5	0.200668	0	0	0	0	0	0	0	0	0	0	0	0	0	0	0	0	0	0	0	0	24	2.28799	0	0	0	0	79	2.57308	3	0.0849206	0
CARD_100752_TM_#01	efflux pump complex or subunit conferring antibiotic resistance; cmeC	antibiotic molecule	1000003	3000159	3000785	4	0	0	0	0	0	0	0	0	0	0	4	0.160534	0	0	0	0	0	0	0	0	0	0	0	0	0	0	0	0	0	0	0	0	19	1.84452	0	0	0	0	2	0.0662035	0	0	0
ARGA_402012_TM_#05	efflux pump complex or subunit conferring antibiotic resistance; cmlA5	chloramphenicol	3000385	3000159	3002695	4	0	0	9	48.8987	0	0	0	0	0	0	0	0	159	122.752	0	0	0	0	0	0	0	0	0	0	0	0	0	0	0	0	0	0	0	0	0	0	5	0.855764	0	0	0	0	2
ARGA_402012_TM_#02	efflux pump complex or subunit conferring antibiotic resistance; cmlA5	chloramphenicol	3000385	3000159	3002695	4	0	0	0	0	0	0	0	0	0	0	0	0	101	133.111	0	0	0	0	0	0	0	0	0	0	0	0	0	0	0	0	0	0	0	0	0	0	14	4.2598	0	0	0	0	0
ARGA_402012_TM_#03	efflux pump complex or subunit conferring antibiotic resistance; cmlA5	chloramphenicol	3000385	3000159	3002695	4	0	0	0	0	0	0	0	0	0	0	0	0	72	118.618	0	0	0	0	0	0	0	0	0	0	0	0	0	0	0	0	0	0	0	0	0	0	15	2.73845	0	0	0	0	0
ARGA_402012_TM_#10	efflux pump complex or subunit conferring antibiotic resistance; cmlA5	chloramphenicol	3000385	3000159	3002695	4	0	0	0	0	0	0	0	0	0	0	0	0	183	193.048	0	0	0	0	0	0	0	0	0	0	0	0	0	0	0	0	0	0	0	0	0	0	22	7.48034	0	0	0	0	0
ARGA_402012_TM_#12	efflux pump complex or subunit conferring antibiotic resistance; cmlA5	chloramphenicol	3000385	3000159	3002695	4	0	0	0	0	0	0	0	0	0	0	0	0	110	88.4614	0	0	0	0	0	0	0	0	0	0	0	0	0	0	0	0	2	3.66448	0	0	0	0	15	1.95603	0	0	0	0	0
ARGA_402012_TM_#13	efflux pump complex or subunit conferring antibiotic resistance; cmlA5	chloramphenicol	3000385	3000159	3002695	4	0	0	0	0	0	0	0	0	0	0	0	0	232	108.812	0	0	0	0	0	0	0	0	0	0	0	0	0	0	0	0	0	0	0	0	0	0	20	2.1807	0	0	0	0	0
CARD_100458_TM_#01	efflux pump complex or subunit conferring antibiotic resistance; cmlB	chloramphenicol	3000385	3000159	3002698	4	0	0	0	0	0	0	0	0	0	0	0	0	48	2.13173	0	0	0	0	0	0	0	0	0	0	0	0	0	0	0	0	0	0	0	0	0	0	0	0	0	0	0	0	0
RESF_302704_TM_#01	efflux pump complex or subunit conferring antibiotic resistance; cmlB1	chloramphenicol	3000385	3000159	3002699	4	0	0	0	0	0	0	0	0	0	0	0	0	77	3.5183	0	0	0	0	0	0	0	0	0	0	2	0.0765508	0	0	0	0	73	10.8717	0	0	0	0	8	0.0805302	29	0.948411	0	0	1
CARD_101281_TM_#01	efflux pump complex or subunit conferring antibiotic resistance; cmx	chloramphenicol	3000385	3000159	3002703	4	0	0	8	57.8173	3	6.89838	3	1.19484	0	0	15	8.17215	193	147.344	0	0	0	0	0	0	2	14.0172	0	0	0	0	0	0	0	0	4	5.43205	0	0	22	157.373	22	4.44013	11	7.71852	0	0	0
CARD_101281_TM_#03	efflux pump complex or subunit conferring antibiotic resistance; cmx	chloramphenicol	3000385	3000159	3002703	4	0	0	107	61.451	28	4.7307	29	1.37105	17	1.26594	152	10.1217	2478	189.699	2	0.0990785	0	0	2	0.147991	18	10.0255	18	11.9082	21	1.37456	30	8.3744	3	0.398301	76	19.2428	6	0.984646	381	284.258	42	0.748553	231	12.6349	34	1.56514	34
CARD_101281_TM_#02	efflux pump complex or subunit conferring antibiotic resistance; cmx	chloramphenicol	3000385	3000159	3002703	4	0	0	0	0	0	0	6	4.84785	0	0	1	3.41136	139	210.461	0	0	0	0	0	0	0	0	0	0	0	0	2	30.9543	0	0	0	0	0	0	41	854.35	0	0	0	0	0	0	0
CARD_102070_TM_#01	efflux pump complex or subunit conferring antibiotic resistance; Corynebacterium striatum tetA	tetracycline, oxacillin, oxytetracycline	0000051, 0000056, 3000668	3000159	3004639	4	0	0	0	0	0	0	0	0	0	0	0	0	0	0	0	0	0	0	0	0	0	0	0	0	72	2.87734	38	6.91847	0	0	0	0	0	0	0	0	0	0	0	0	0	0	22
CARD_102668_TM_#01	efflux pump complex or subunit conferring antibiotic resistance; CrcB	aminoglycoside antibiotic	16	3000159	3005049	4	0	0	0	0	0	0	0	0	0	0	0	0	0	0	0	0	0	0	0	0	0	0	0	0	0	0	0	0	0	0	0	0	0	0	0	0	6	0.150281	0	0	0	0	0
CARD_101340_TM_#01	efflux pump complex or subunit conferring antibiotic resistance; efflux pump complex or subunit conferring antibiotic resistance	antibiotic molecule	1000003	3000159	3000159	2	15	0.268346	0	0	34	3.92793	639	19.1396	11551	535.782	42532	1782.6	95419	4602.69	907	27.8721	6996	249.265	24	1.16064	115	39.8436	0	0	36	1.52655	321	61.4864	5634	464.011	396	62.8388	168	16.8941	2242	1051.86	644518	7233.59	6416	221.901	6956	206.405	277163
CARD_102116_TM_#01	efflux pump complex or subunit conferring antibiotic resistance; efmA	erythromycin, fluoroquinolone antibiotic	0000006, 0000001	3000159	3003954	4	0	0	0	0	4	0.429476	14	0.396436	0	0	2	0.0802672	67	3.0551	4	0.11734	0	0	0	0	0	0	0	0	0	0	0	0	0	0	16	2.41425	0	0	0	0	0	0	0	0	0	0	23
CARD_102117_TM_#01	efflux pump complex or subunit conferring antibiotic resistance; efpA	rifampin, isoniazid	3000169, 3000520	3000159	3003955	4	95	1.58398	344	115.642	58	6.33294	202	5.72717	350	15.3524	234	9.28869	715	32.4456	21	0.613245	60	2.00912	384	17.4758	182	59.0001	17	6.65924	1157	46.2555	323	58.1237	33	2.58201	12	1.74928	24	2.32241	12	5.36154	23	0.244238	153	4.9948	37	1.03981	2
CARD_102112_TM_#01	efflux pump complex or subunit conferring antibiotic resistance; efrA	antibiotic molecule	1000003	3000159	3003948	4	0	0	0	0	2	0.216969	11	0.302034	928	40.5573	94	3.74605	38963	1777.41	4	0.11734	0	0	0	0	686	224.192	0	0	9	0.361538	0	0	8	0.610916	0	0	0	0	156	69.3062	554	5.89481	0	0	521	14.511	35
CARD_102113_TM_#01	efflux pump complex or subunit conferring antibiotic resistance; efrB	antibiotic molecule	1000003	3000159	3003949	4	0	0	12	4.08078	30	3.27581	10	0.286875	882	38.671	78	3.06065	35985	1639.04	8	0.232719	0	0	0	0	678	221.181	0	0	0	0	1	0.182084	6	0.450611	0	0	0	0	95	41.9105	448	4.76359	2	0.0662035	422	11.8365	47
CARD_100579_TM_#01	efflux pump complex or subunit conferring antibiotic resistance; emeA	acriflavine	45	3000159	3003551	4	0	0	0	0	0	0	0	0	531	23.3053	37	1.46792	25695	1171.78	6	0.174347	0	0	0	0	405	132.808	0	0	0	0	0	0	13	1.02334	0	0	0	0	92	40.5394	370	3.93183	0	0	175	4.90253	45
CARD_101653_TM_#01	efflux pump complex or subunit conferring antibiotic resistance; emrA	antibiotic molecule	1000003	3000159	3000027	4	613	10.0437	0	0	1048	110.797	2792	77.8475	6872	299.182	51918	2051.75	98315	4479.42	3338	95.9688	11934	400.286	962	42.3084	900	287.545	60	22.7278	5621	220.998	721	127.932	10089	773.119	368	55.2258	858	80.5955	1685	740.439	780924	8279.61	5207	168.728	13862	385.579	263209
CARD_100570_TM_#02	efflux pump complex or subunit conferring antibiotic resistance; emrK	antibiotic molecule	1000003	3000159	3000206	4	0	0	0	0	1	0.335474	142	11.9677	420	55.2745	6382	751.642	21143	2860.38	0	0	1577	158.935	0	0	0	0	0	0	0	0	0	0	0	0	48	20.8906	20	5.7365	20	26.5985	75132	2368.52	173	16.7384	656	55.6077	59244
CARD_100570_TM_#01	efflux pump complex or subunit conferring antibiotic resistance; emrK	antibiotic molecule	1000003	3000159	3000206	4	0	0	0	0	0	0	136	7.62067	413	35.9859	6208	486.769	23588	2125.56	18	1.04736	1351	89.9223	0	0	2	1.16271	0	0	0	0	0	0	0	0	60	18.0479	17	3.17521	15	13.1947	76717	1606.05	206	13.3667	752	42.0798	62584
CARD_100503_TM_#01	efflux pump complex or subunit conferring antibiotic resistance; emrY	antibiotic molecule	1000003	3000159	3000254	4	0	0	0	0	0	0	353	9.92785	858	37.533	13144	519.892	49027	2232.13	15	0.43581	3105	104.516	0	0	16	5.27662	0	0	0	0	0	0	0	0	143	21.4426	65	6.2452	27	11.9244	154533	1636	400	13.0499	1546	43.253	124025
CARD_102243_TM_#01	efflux pump complex or subunit conferring antibiotic resistance; Escherichia coli emrE	erythromycin	6	3000159	3004039	5	0	0	0	0	28	11.1342	12	1.26721	219	36.9525	5389	806.258	1254	214.88	1	0.115084	625	79.4839	0	0	3	3.88168	0	0	0	0	0	0	0	0	13	7.69541	16	6.102	10	17.3249	165606	6641.87	101	12.4315	462	48.743	13962
NCBI_203129_TM_#01	efflux pump complex or subunit conferring antibiotic resistance; Escherichia coli mdfA	tetracycline, benzalkonium chloride, rhodamine	0000051, 3003823, 3003827	3000159	3001328	4	43	7.91537	0	0	179	208.48	124	40.9651	4537	2355.39	4704	2378.09	9116	5670.08	535	189.692	731	318.762	10	7.10866	24	84.1523	0	0	338	144.391	70	135.673	3315	3276.17	109	218.512	8	8.26312	765	4056.44	73208	10107	1401	616.921	909	295.033	28020
NCBI_203129_TM_#03	efflux pump complex or subunit conferring antibiotic resistance; Escherichia coli mdfA	tetracycline, benzalkonium chloride, rhodamine	0000051, 3003823, 3003827	3000159	3001328	4	1274	194.737	0	0	2996	2807.43	2871	762.77	12529	4783.48	18250	6727.64	36845	16296.4	5330	1348.64	9191	2844.53	608	255.769	179	498.139	80	262.066	9988	3565.93	2654	4203.72	16971	12241.8	553	734.187	209	180.829	5332	21609.8	206207	20245	9924	3003.97	15482	3947.08	85898
NCBI_203129_TM_#07	efflux pump complex or subunit conferring antibiotic resistance; Escherichia coli mdfA	tetracycline, benzalkonium chloride, rhodamine	0000051, 3003823, 3003827	3000159	3001328	4	219	78.733	0	0	771	1608.81	1019	619.465	6640	5878	7707	6876.4	16564	17290	1057	608.298	2772	1952.94	128	263.897	101	1034.09	11	68.8115	2796	2439.73	533	2343.25	6082	11178.4	264	707.745	812	1395.16	1992	18552.1	115732	26412.8	3428	2460.43	7647	4397.57	39859
NCBI_203129_TM_#11	efflux pump complex or subunit conferring antibiotic resistance; Escherichia coli mdfA	tetracycline, benzalkonium chloride, rhodamine	0000051, 3003823, 3003827	3000159	3001328	4	136	21.9706	0	0	412	403.518	469	126.95	9632	3886.79	11060	4281.71	17103	7554.77	1454	382.805	2874	893.067	0	0	37	108.692	0	0	3097	1179.45	406	742.521	5253	3744.71	394	524.739	41	35.2308	3324	13691.3	164289	17004.6	3217	981.93	7082	1857.47	53376
NCBI_203129_TM_#12	efflux pump complex or subunit conferring antibiotic resistance; Escherichia coli mdfA	tetracycline, benzalkonium chloride, rhodamine	0000051, 3003823, 3003827	3000159	3001328	4	74	12.6803	0	0	370	406.985	405	123.022	8382	3767.08	10238	4406.66	16470	8238.91	1386	409.819	2459	864.408	2	0.873332	51	180.813	0	0	1817	743.353	454	824.253	4333	3693.13	337	489.832	55	53.5495	3301	15489.3	153709	18074.2	3008	1029.99	6830	2045	53460
CARD_101381_TM_#01	efflux pump complex or subunit conferring antibiotic resistance; facT	factumycin	3001220	3000159	3001313	4	0	0	0	0	0	0	0	0	11	0.485748	0	0	0	0	0	0	0	0	0	0	0	0	0	0	0	0	0	0	0	0	0	0	0	0	0	0	0	0	0	0	0	0	0
RESF_302689_TM_#01	efflux pump complex or subunit conferring antibiotic resistance; fexA	chloramphenicol, florfenicol	3000385, 3000461	3000159	3002704	4	0	0	0	0	0	0	10	0.860626	0	0	27	3.09655	1	0.138746	0	0	0	0	0	0	0	0	0	0	0	0	0	0	0	0	314	140.407	0	0	0	0	0	0	5	0.496526	0	0	8
RESF_302689_TM_#02	efflux pump complex or subunit conferring antibiotic resistance; fexA	chloramphenicol, florfenicol	3000385, 3000461	3000159	3002704	4	0	0	0	0	0	0	2	4.87688	0	0	6	14.7419	0	0	0	0	0	0	0	0	0	0	0	0	0	0	0	0	0	0	70	789.262	0	0	0	0	0	0	0	0	0	0	0
RESF_302689_TM_#03	efflux pump complex or subunit conferring antibiotic resistance; fexA	chloramphenicol, florfenicol	3000385, 3000461	3000159	3002704	4	0	0	0	0	0	0	7	0.767153	0	0	3	0.475189	0	0	0	0	0	0	0	0	0	0	0	0	0	0	0	0	0	0	77	43.4877	0	0	0	0	0	0	0	0	0	0	0
NCBI_205332_TM_#01	efflux pump complex or subunit conferring antibiotic resistance; flo	chloramphenicol, florfenicol	3000385, 3000461	3000159	3003963	4	0	0	32	54.3831	138	74.0766	33	4.5948	20	4.35096	215	40.8319	957	203.677	0	0	1	0.17039	4	0.756576	11	16.2334	58	93.7312	0	0	4	3.64168	121	43.6692	69847	50142.2	31	14.3966	1	2.23398	4152	209.568	14	2.17524	32	4.19443	16
NCBI_205332_TM_#02	efflux pump complex or subunit conferring antibiotic resistance; flo	chloramphenicol, florfenicol	3000385, 3000461	3000159	3003963	4	0	0	34	98.3868	91	87.727	25	6.87889	3	1.12619	69	24.1676	922	431.591	0	0	3	0.868987	13	5.10899	0	0	0	0	0	0	0	0	164	122.216	43032	61274	18	15.5825	0	0	2360	250.003	13	3.69288	58	15.7965	3
NCBI_205332_TM_#05	efflux pump complex or subunit conferring antibiotic resistance; flo	chloramphenicol, florfenicol	3000385, 3000461	3000159	3003963	4	0	0	8	23.9244	23	22.0946	0	0	2	0.77668	74	27.8241	283	138.296	0	0	0	0	0	0	6	19.6604	20	103.341	0	0	0	0	3	2.07696	28178	40129.7	12	11.7708	0	0	1357	145.66	13	3.94407	12	2.99265	0
NCBI_205332_TM_#06	efflux pump complex or subunit conferring antibiotic resistance; flo	chloramphenicol, florfenicol	3000385, 3000461	3000159	3003963	4	0	0	40	165.252	51	56.8176	21	6.69567	3	1.35142	86	51.3329	644	359.472	0	0	6	7.44846	2	0.943198	5	16.8206	41	345.324	10	4.09802	0	0	49	39.3731	28740	51377.3	5	5.09953	0	0	1588	212.521	11	3.71402	15	4.33095	2
NCBI_205332_TM_#07	efflux pump complex or subunit conferring antibiotic resistance; flo	chloramphenicol, florfenicol	3000385, 3000461	3000159	3003963	4	0	0	37	161.487	45	75.2309	2	0.914416	0	0	122	63.8851	191	119.758	0	0	0	0	0	0	3	15.7693	51	318.164	0	0	0	0	47	57.5531	28338	60437	4	6.19734	0	0	1802	259.849	17	6.15336	6	1.43836	0
NCBI_205332_TM_#09	efflux pump complex or subunit conferring antibiotic resistance; flo	chloramphenicol, florfenicol	3000385, 3000461	3000159	3003963	4	0	0	66	229.05	74	87.4824	5	1.62267	0	0	127	60.1912	894	499.38	2	0.598434	18	6.85399	0	0	6	20.1847	0	0	0	0	2	3.71451	4	3.21236	45523	82599.3	6	6.25455	0	0	2108	286.341	7	2.36347	111	43.6573	0
CARD_102245_TM_#01	efflux pump complex or subunit conferring antibiotic resistance; Klebsiella pneumoniae acrA	antibiotic molecule	1000003	3000159	3004041	5	2	0.0321748	0	0	84	8.72778	123	3.40498	4207	183.59	5122	200.322	4917	220.522	122	3.49405	493	16.3737	14	0.635874	8	2.57729	0	0	10	0.388037	155	27.399	14151	1098.31	42	6.05219	20	1.88733	1136	493.985	93553	983.438	389	12.4224	349	9.47859	25857
CARD_102606_TM_#01	efflux pump complex or subunit conferring antibiotic resistance; Klebsiella pneumoniae KpnE	cephalosporin	32	3000159	3004580	4	0	0	0	0	0	0	1	0.0975377	346	50.1781	146	18.5038	174	26.1669	4	0.398956	30	3.364	0	0	0	0	0	0	0	0	3	1.85726	1194	310.209	0	0	0	0	56	81.0971	10887	381.592	5	0.56273	7	0.628737	1661
CARD_102609_TM_#01	efflux pump complex or subunit conferring antibiotic resistance; Klebsiella pneumoniae KpnF	cephalosporin	32	3000159	3004583	4	27	1.57581	0	0	0	0	188	18.0322	687	111.125	1198	171.303	1091	181.349	21	1.97646	115	13.8396	643	99.1797	23	27.3176	17	26.5349	282	37.6747	125	85.2396	411	116.657	36	20.1792	31	9.83874	549	894.327	20260	807.273	144	16.5048	486	47.9614	4561
CARD_102619_TM_#01	efflux pump complex or subunit conferring antibiotic resistance; Klebsiella pneumoniae KpnG	cephalosporin	32	3000159	3004588	4	5	0.0845378	0	0	0	0	64	1.80628	5632	246.566	5475	217.034	4360	199.114	87	2.52876	376	12.6085	0	0	4	1.31926	24	8.88136	63	2.53097	28	5.01089	14252	1108.1	23	3.45087	0	0	1059	468.752	84406	895.018	505	16.4452	135	3.74658	24201
CARD_102620_TM_#01	efflux pump complex or subunit conferring antibiotic resistance; Klebsiella pneumoniae KpnH	cephalosporin	32	3000159	3004597	4	1947	32.4295	0	0	14183	1538.81	6666	189.209	41618	1824.69	94084	3730.27	165583	7556.39	17635	513.181	19675	663.634	4053	185.7	705	230.47	269	103.933	14946	595.401	2300	412.773	50610	3942.68	1371	205.194	1529	146.866	10058	4459.85	1103164	11713.3	30795	1008.4	67572	1896.63	403288
CARD_102121_TM_#01	efflux pump complex or subunit conferring antibiotic resistance; lfrA	fluoroquinolone antibiotic	1	3000159	3003967	4	9	0.152168	1	0.340102	30	3.23114	14	0.399291	14	0.618241	3	0.120401	30	1.36093	8	0.234604	0	0	6	0.272586	0	0	4	1.567	3	0.12053	1	0.182084	7	0.551037	0	0	5	0.486066	0	0	1	0.010739	11	0.363346	0	0	0
ARGA_401810_TM_#01	efflux pump complex or subunit conferring antibiotic resistance; lmrB	antibiotic molecule	1000003	3000159	3002813	4	0	0	47	15.7427	0	0	5	0.136108	0	0	0	0	0	0	0	0	0	0	4	0.184941	0	0	0	0	0	0	0	0	0	0	0	0	0	0	0	0	0	0	0	0	0	0	4
CARD_101527_TM_#01	efflux pump complex or subunit conferring antibiotic resistance; lmrD	lincosamide antibiotic	17	3000159	3002882	4	162	2.68894	140	47.5836	0	0	406	11.4581	1141	49.9415	1750	69.2397	1373	62.5246	4	0.117187	0	0	0	0	6243	2037.88	0	0	11880	470.731	0	0	5917	459.512	30	4.45625	28	2.69388	2	0.837741	0	0	0	0	0	0	1160
CARD_102122_TM_#01	efflux pump complex or subunit conferring antibiotic resistance; lmrP	macrolide antibiotic, lincosamide antibiotic, streptogramin antibiotic, tetracycline antibiotic	0000000, 0000017, 0000026, 3000050	3000159	3003969	4	0	0	0	0	0	0	0	0	0	0	0	0	2	0.0924976	0	0	0	0	0	0	0	0	0	0	0	0	0	0	0	0	0	0	0	0	0	0	0	0	0	0	0	0	0
CARD_102674_TM_#01	efflux pump complex or subunit conferring antibiotic resistance; LptD	carbapenem, peptide antibiotic, aminocoumarin antibiotic, rifamycin antibiotic	0000020, 3000053, 3000103, 3000157	3000159	3005059	4	49	0.818759	0	0	170	18.4011	317	8.97949	8718	382.167	7450	295.544	16109	736.314	493	14.3279	1332	44.9244	8	0.363183	20	6.59588	37	14.4932	746	29.5802	120	21.7272	21583	1680.62	242	36.2124	40	3.83195	2253	998.424	155562	1651.02	2188	71.7957	1340	37.6589	54904
CARD_101581_TM_#01	efflux pump complex or subunit conferring antibiotic resistance; macA	antibiotic molecule	1000003	3000159	3000533	4	0	0	0	0	0	0	0	0	0	0	0	0	0	0	0	0	0	0	0	0	0	0	0	0	0	0	0	0	0	0	0	0	0	0	0	0	0	0	0	0	12	0.339239	0
CARD_100459_TM_#01	efflux pump complex or subunit conferring antibiotic resistance; macB	antibiotic molecule	1000003	3000159	3000535	4	0	0	0	0	0	0	0	0	0	0	0	0	6	0.26015	0	0	0	0	0	0	0	0	0	0	0	0	0	0	0	0	0	0	0	0	0	0	0	0	0	0	0	0	3
CARD_100401_TM_#01	efflux pump complex or subunit conferring antibiotic resistance; mdsA	antibiotic molecule	1000003	3000159	3000789	4	0	0	0	0	0	0	0	0	0	0	0	0	0	0	0	0	0	0	0	0	0	0	0	0	0	0	0	0	2	0.153849	0	0	0	0	0	0	0	0	0	0	0	0	0
CARD_101299_TM_#01	efflux pump complex or subunit conferring antibiotic resistance; mdsB	antibiotic molecule	1000003	3000159	3000790	4	0	0	0	0	0	0	0	0	0	0	1	0.0376253	8	0.360308	0	0	0	0	0	0	0	0	0	0	0	0	0	0	0	0	0	0	0	0	0	0	3	0.032217	0	0	0	0	0
CARD_100361_TM_#01	efflux pump complex or subunit conferring antibiotic resistance; mdtA	antibiotic molecule	1000003	3000159	3000792	4	60	1.00831	4	1.34285	417	45.2419	936	26.4699	3358	147.287	29037	1151.11	73593	3358.64	336	9.80487	5015	168.849	5	0.231176	178	58.0466	0	0	263	10.438	279	50.4611	1013	79.388	223	33.4555	104	9.88591	1408	626.079	524888	5572.57	2563	84.0163	3769	105.754	185175
CARD_100775_TM_#01	efflux pump complex or subunit conferring antibiotic resistance; mdtB	antibiotic molecule	1000003	3000159	3000793	4	550	12.2934	0	0	1541	224.448	2468	93.8756	7826	459.585	32526	1724.55	84566	5167.1	3708	144.9	7673	346.093	46	2.79747	190	83.1198	13	6.60604	7234	385.581	68	16.6163	6075	634.038	268	53.7613	153	19.704	813	482.685	491600	6984.64	8205	360.086	19230	722.587	195368
CARD_100775_TM_#02	efflux pump complex or subunit conferring antibiotic resistance; mdtB	antibiotic molecule	1000003	3000159	3000793	4	4673	844.201	4	17.3452	4869	6099.03	10246	3268.77	17273	8733.21	41047	18342.3	19870	9781.11	17699	6072.82	14734	5376.82	8327	3944.3	11076	42186.5	478	1970.62	24864	11287.6	1234	2437.08	68452	60689.3	528	906.943	7697	8375.96	5684	28235	175912	20362.1	7928	2794.92	16717	5125.13	62614
CARD_101239_TM_#01	efflux pump complex or subunit conferring antibiotic resistance; mdtC	antibiotic molecule	1000003	3000159	3000794	4	379	6.27773	9	3.06047	1204	129.741	2116	59.5161	17203	751.861	52053	2063.24	106144	4842.76	3844	110.855	9520	320.058	1634	72.4501	680	217.314	18	6.885	4436	175.633	790	142.316	17686	1373.78	757	113.307	243	23.1259	5089	2251.82	871645	9250.5	9666	315.797	18090	507.293	290148
CARD_101793_TM_#01	efflux pump complex or subunit conferring antibiotic resistance; mdtE	antibiotic molecule	1000003	3000159	3000795	4	0	0	32	10.8833	2	0.211476	841	23.8161	2200	96.4713	48340	1914.84	99853	4555	62	1.79849	7147	240.422	0	0	85	27.816	0	0	142	5.70472	82	14.6619	10	0.755731	341	51.0541	211	20.2678	57	25.0836	723948	7681.97	853	27.8908	3673	103.097	318156
CARD_100107_TM_#01	efflux pump complex or subunit conferring antibiotic resistance; mdtF	antibiotic molecule	1000003	3000159	3000796	4	0	0	0	0	0	0	496	20.0237	1253	79.1712	24340	1387.79	57067	3745.41	13	0.548106	4250	205.99	2	0.133977	17	8.02316	0	0	119	6.81151	0	0	0	0	192	41.1587	105	14.4716	28	17.9141	354728	5416.83	557	26.0605	1877	75.699	184746
CARD_100107_TM_#02	efflux pump complex or subunit conferring antibiotic resistance; mdtF	antibiotic molecule	1000003	3000159	3000796	4	0	0	0	0	0	0	89	17.6091	157	49.3043	3265	898.72	9331	2918.12	2	0.440025	463	108.904	1	0.346764	6	14.8177	0	0	0	0	0	0	0	0	37	41.8501	29	18.3585	2	6.70193	60435	4449.35	66	15.3254	435	87.526	31899
CARD_100564_TM_#01	efflux pump complex or subunit conferring antibiotic resistance; mdtG	fosfomycin	25	3000159	3001329	4	113	1.87853	0	0	840	91.1614	522	14.6767	2514	110.155	32092	1269.39	86839	3956.1	758	22.0041	5746	193.148	123	5.62814	95	30.9124	4	1.567	290	11.5589	0	0	2446	190.524	160	23.9631	467	44.8677	101	44.0864	503721	5342.51	1522	49.7572	3788	106.115	220201
CARD_100350_TM_#01	efflux pump complex or subunit conferring antibiotic resistance; mdtH	enoxacin, norfloxacin	0000023, 3000662	3000159	3001216	4	10	0.160312	0	0	30	3.27524	546	15.4281	2325	101.669	38781	1536.01	106262	4846.01	203	5.86229	6873	231.303	37	1.62134	54	17.7002	0	0	81	3.18756	0	0	565	44.1409	201	30.2266	112	10.7301	207	90.7984	556470	5904.54	1081	35.2367	3801	106.37	285017
CARD_101648_TM_#01	efflux pump complex or subunit conferring antibiotic resistance; MdtK	ciprofloxacin, fluoroquinolone antibiotic	0000036, 0000001	3000159	3001327	4	39	0.644653	0	0	78	8.28843	178	5.01857	4106	179.317	1372	53.9659	1998	90.7554	437	12.5465	501	16.6323	451	20.8167	27	8.86489	0	0	556	21.9448	8	1.38065	2368	183.502	36	5.37896	40	3.73374	113	49.7136	32117	341.866	1505	49.2383	1704	47.9631	11050
CARD_101122_TM_#01	efflux pump complex or subunit conferring antibiotic resistance; mdtM	acriflavine, lincomycin, puromycin, chloramphenicol, norfloxacin	0000045, 0000046, 0000047, 3000385, 3000662	3000159	3001214	4	12	0.202869	0	0	0	0	646	18.2634	1666	72.9968	2781	110.224	75464	3440.14	52	1.51455	50	1.69603	14	0.629955	0	0	0	0	10	0.401767	16	2.91334	0	0	99	14.911	71	6.76266	59	26.0234	260156	2757	639	20.9375	2321	64.9708	228525
CARD_101353_TM_#01	efflux pump complex or subunit conferring antibiotic resistance; mdtN	antibiotic molecule	1000003	3000159	3003548	4	0	0	0	0	10	1.09194	806	22.7516	2049	89.6444	39963	1584.29	94181	4298.28	46	1.33519	5392	181.594	0	0	123	40.0746	0	0	0	0	0	0	0	0	205	30.4635	135	12.9202	55	24.259	614084	6518.53	803	26.3228	3169	88.9831	286108
CARD_101935_TM_#01	efflux pump complex or subunit conferring antibiotic resistance; mdtO	antibiotic molecule	1000003	3000159	3003549	4	2	0.0338151	25	8.41455	0	0	656	18.5918	2075	90.8878	32893	1302.62	98513	4493.99	56	1.63635	5451	183.76	12	0.538628	41	13.1515	0	0	16	0.626477	0	0	0	0	372	55.5007	121	11.6206	42	18.4007	479973	5089.31	943	30.7801	2448	68.4868	312059
CARD_100037_TM_#01	efflux pump complex or subunit conferring antibiotic resistance; mdtP	antibiotic molecule	1000003	3000159	3003550	4	14	0.236706	0	0	14	1.51681	737	20.8198	1970	86.4274	41886	1660.02	90403	4124.62	52	1.49987	6678	224.951	12	0.5436	53	17.0497	0	0	6	0.224891	0	0	15	1.17907	279	42.0341	159	15.2494	57	25.3438	487385	5172.11	833	27.1901	2961	82.8766	274050
CARD_101128_TM_#01	efflux pump complex or subunit conferring antibiotic resistance; mef(B)	macrolide antibiotic	0	3000159	3003107	5	0	0	0	0	0	0	0	0	0	0	0	0	0	0	0	0	0	0	6	0.272059	0	0	2	0.7835	0	0	7	1.27459	0	0	0	0	0	0	2	0.893007	2	0.021478	0	0	0	0	0
CARD_102127_TM_#01	efflux pump complex or subunit conferring antibiotic resistance; Mef(En2)	macrolide antibiotic	0	3000159	3004659	5	1368	22.7404	1889	638.912	79	8.59838	35767	1009.2	76	3.32897	49313	1949.66	2957	134.483	1593	46.2979	2	0.065999	581	26.3476	38418	12493.9	7561	2925.57	53302	2115.5	588940	105952	95398	7411.38	7914	1184.4	10960	1049.53	1990	877.945	2044	21.6046	33051	1077.65	99	2.7655	37
CARD_102020_TM_#01	efflux pump complex or subunit conferring antibiotic resistance; mefC	macrolide antibiotic	0	3000159	3003745	5	0	0	73	24.8031	0	0	0	0	0	0	0	0	35	1.6118	0	0	0	0	2	0.0924704	17	5.58251	0	0	0	0	689	124.311	0	0	318	47.6249	95	9.13833	0	0	3027	32.0361	0	0	0	0	4
NCBI_202804_TM_#02	efflux pump complex or subunit conferring antibiotic resistance; mepA	tigecycline, glycylcycline	0000030, 0000042	3000159	3000026	4	0	0	0	0	0	0	0	0	0	0	0	0	2	0.248283	0	0	0	0	0	0	0	0	0	0	0	0	0	0	0	0	0	0	0	0	0	0	0	0	0	0	0	0	0
CARD_100452_TM_#01	efflux pump complex or subunit conferring antibiotic resistance; MexA	antibiotic molecule	1000003	3000159	3000377	4	245	3.9022	0	0	40	4.2737	12	0.32514	32	1.37374	68	2.60365	69	3.05307	54	1.51353	113	3.69141	0	0	0	0	26	9.86805	54	2.04827	0	0	0	0	29	4.17845	74	6.84033	16	6.9536	11525	121.991	556	17.6525	267	7.25582	754
CARD_101828_TM_#01	efflux pump complex or subunit conferring antibiotic resistance; MexB	antibiotic molecule	1000003	3000159	3000378	4	86	1.36349	0	0	85	8.99875	81	2.17622	63	2.62544	169	6.38489	130	5.67878	48	1.3506	67	2.14862	44	1.90547	1323	409.946	0	0	65	2.44369	104	17.8491	1318	99.6665	6	0.859814	16	1.47123	22	9.22967	14502	153.061	353	11.123	65	1.78606	356
CARD_100764_TM_#01	efflux pump complex or subunit conferring antibiotic resistance; MexC	antibiotic molecule	1000003	3000159	3000800	4	456	7.23581	0	0	6	0.61648	168	4.51737	49	2.03056	95	3.58007	37	1.66131	34	0.936393	120	3.83863	278	12.0468	0	0	14	5.14172	94	3.53647	0	0	0	0	8	1.13066	34	3.10119	0	0	10240	108.565	674	21.0629	121	3.21689	623
CARD_101522_TM_#01	efflux pump complex or subunit conferring antibiotic resistance; MexD	antibiotic molecule	1000003	3000159	3000801	4	6	0.101313	0	0	2	0.204487	0	0	7	0.309091	181	7.17686	19	0.823601	30	0.86517	21	0.677825	0	0	0	0	0	0	0	0	0	0	0	0	28	4.09793	7	0.665786	2	0.89359	9692	102.39	2866	92.3799	56	1.51498	946
CARD_101065_TM_#01	efflux pump complex or subunit conferring antibiotic resistance; MexE	antibiotic molecule	1000003	3000159	3000803	4	16	0.261854	0	0	0	0	0	0	0	0	0	0	2	0.0872511	0	0	2	0.0637399	0	0	0	0	4	1.46547	0	0	0	0	0	0	8	1.13482	46	4.29708	0	0	10139	107.323	16	0.505272	19	0.502531	22
CARD_102271_TM_#01	efflux pump complex or subunit conferring antibiotic resistance; MexF	antibiotic molecule	1000003	3000159	3000804	4	491389	8216.24	312	102.98	33223	3599.71	277399	7869.31	141569	6199	161166	6398.55	34294	1555.84	296801	8641.43	254139	8560.23	174211	7950.97	4441	1452.6	12435	4815.25	187581	7469.4	483	86.9013	180904	14086.4	36026	5385.15	30984	2969.29	10879	4812.08	98809	1044.16	220685	7203.75	250336	7015.37	179759
CARD_100940_TM_#01	efflux pump complex or subunit conferring antibiotic resistance; MexG	antibiotic molecule	1000003	3000159	3000806	4	0	0	0	0	0	0	0	0	0	0	0	0	0	0	0	0	0	0	0	0	0	0	1	0.848976	0	0	0	0	0	0	0	0	0	0	0	0	4656	119.377	0	0	16	1.12128	0
CARD_101263_TM_#01	efflux pump complex or subunit conferring antibiotic resistance; MexH	antibiotic molecule	1000003	3000159	3000807	4	0	0	0	0	0	0	0	0	0	0	0	0	0	0	0	0	0	0	0	0	0	0	0	0	0	0	4	0.728335	0	0	0	0	0	0	0	0	7222	76.4431	0	0	10	0.279164	0
CARD_101550_TM_#01	efflux pump complex or subunit conferring antibiotic resistance; MexI	antibiotic molecule	1000003	3000159	3000808	4	16	0.259592	0	0	11	1.15992	0	0	36	1.53895	79	3.05862	3	0.130555	19	0.531236	3	0.0958071	0	0	0	0	22	8.6185	0	0	65	11.8345	0	0	16	2.27347	61	5.70126	2	0.89359	15023	159.321	623	19.7579	75	2.00474	159
CARD_101985_TM_#01	efflux pump complex or subunit conferring antibiotic resistance; MexJ	antibiotic molecule	1000003	3000159	3003692	4	10	0.157928	0	0	0	0	0	0	0	0	1	0.0387654	0	0	0	0	0	0	0	0	0	0	0	0	16	0.60265	12	2.12348	0	0	0	0	199	18.6084	0	0	8876	94.0316	2	0.0662035	25	0.705926	2
CARD_101986_TM_#01	efflux pump complex or subunit conferring antibiotic resistance; MexK	antibiotic molecule	1000003	3000159	3003693	4	355	5.68701	0	0	24	2.55461	83	2.26086	123	5.24424	131	5.07314	483	21.4565	133	3.75892	941	30.8536	1	0.0431867	4	1.30056	157	60.4358	24	0.925398	0	0	3	0.231027	339	50.2381	509	48.1288	21	8.87806	13189	139.537	2388	75.7912	1235	34.0962	1554
CARD_101990_TM_#01	efflux pump complex or subunit conferring antibiotic resistance; mexM	antibiotic molecule	1000003	3000159	3003704	4	0	0	0	0	0	0	0	0	1	0.0441642	0	0	0	0	0	0	0	0	4	0.180689	0	0	0	0	0	0	0	0	0	0	0	0	0	0	0	0	11804	125.196	4	0.132407	0	0	0
CARD_101991_TM_#01	efflux pump complex or subunit conferring antibiotic resistance; mexN	antibiotic molecule	1000003	3000159	3003705	4	1	0.0158121	0	0	0	0	0	0	0	0	0	0	0	0	0	0	0	0	0	0	0	0	0	0	12	0.480237	0	0	0	0	0	0	0	0	0	0	11589	122.658	4	0.128379	4	0.111479	0
CARD_101981_TM_#01	efflux pump complex or subunit conferring antibiotic resistance; mexP	antibiotic molecule	1000003	3000159	3003698	4	0	0	0	0	0	0	67	1.8177	10	0.423347	16	0.607044	0	0	0	0	0	0	0	0	0	0	0	0	0	0	0	0	2	0.148537	0	0	6	0.564107	0	0	7673	81.3239	31	0.989554	0	0	0
CARD_101982_TM_#01	efflux pump complex or subunit conferring antibiotic resistance; mexQ	antibiotic molecule	1000003	3000159	3003699	4	890	14.5429	0	0	6	0.655162	4553	127.267	109	4.70144	89	3.48316	978	43.878	85	2.44792	861	28.471	0	0	0	0	135	51.8438	810	31.5948	4	0.719288	19	1.45183	89	12.9892	41	3.85553	1	0.435967	10906	115.525	1206	38.4535	412	11.4518	168
CARD_101987_TM_#01	efflux pump complex or subunit conferring antibiotic resistance; MexV	antibiotic molecule	1000003	3000159	3003030	4	0	0	0	0	0	0	0	0	0	0	0	0	0	0	0	0	0	0	0	0	0	0	0	0	0	0	0	0	0	0	0	0	0	0	0	0	11463	121.334	2	0.0638659	0	0	0
CARD_101988_TM_#01	efflux pump complex or subunit conferring antibiotic resistance; MexW	antibiotic molecule	1000003	3000159	3003031	4	5246	85.1629	0	0	1146	120.649	916	25.2908	935	39.943	1112	43.0917	3085	137.586	3976	113.089	12872	424.439	165	7.38284	92	28.8427	957	361.707	1614	62.3555	0	0	72	5.48692	1496	217.987	4607	432.308	384	163.997	18393	193.669	10850	346.275	11331	310.461	9190
NCBI_205815_TM_#01	efflux pump complex or subunit conferring antibiotic resistance; mexX	antibiotic molecule	1000003	3000159	3003034	4	0	0	0	0	0	0	0	0	0	0	0	0	0	0	4	0.534316	0	0	0	0	0	0	0	0	0	0	32	21.1158	0	0	0	0	0	0	0	0	3093	141.726	0	0	0	0	0
NCBI_205815_TM_#02	efflux pump complex or subunit conferring antibiotic resistance; mexX	antibiotic molecule	1000003	3000159	3003034	4	0	0	0	0	0	0	0	0	0	0	0	0	0	0	0	0	0	0	0	0	0	0	0	0	0	0	0	0	0	0	0	0	0	0	0	0	1132	57.3556	0	0	0	0	0
NCBI_205815_TM_#04	efflux pump complex or subunit conferring antibiotic resistance; mexX	antibiotic molecule	1000003	3000159	3003034	4	0	0	0	0	0	0	0	0	0	0	0	0	0	0	0	0	0	0	0	0	0	0	0	0	0	0	0	0	0	0	0	0	0	0	0	0	2627	138.909	0	0	42	5.10239	0
CARD_101683_TM_#01	efflux pump complex or subunit conferring antibiotic resistance; mexY	antibiotic molecule	1000003	3000159	3003033	4	0	0	0	0	0	0	0	0	0	0	0	0	0	0	0	0	0	0	0	0	0	0	11	4.30874	0	0	8	1.41573	0	0	0	0	0	0	0	0	7299	77.2515	4	0.125672	16	0.45291	0
CARD_102114_TM_#01	efflux pump complex or subunit conferring antibiotic resistance; msbA	metronidazole	3000689	3000159	3003950	4	100	2.03324	0	0	467	61.7481	1270	43.8789	11739	631.262	39877	1932.66	85316	4751.81	2000	71.35	6229	256.384	389	21.66	98	39.3156	11	5.09517	874	42.168	922	204.035	6605	632.678	1232	227.039	186	21.9269	7514	4081.45	778682	10105.8	8059	323.654	12764	439.884	261043
CARD_102114_TM_#02	efflux pump complex or subunit conferring antibiotic resistance; msbA	metronidazole	3000689	3000159	3003950	4	0	0	0	0	6	55.6887	21	20.038	78	220.349	1287	2473.41	3470	7098.02	10	16.4823	169	313.663	0	0	0	0	0	0	0	0	17	254.599	260	1343.99	4	30.2686	9	59.6342	13	493.709	15408	8873.62	48	106.05	895	1659.39	7347
CARD_102213_TM_#01	efflux pump complex or subunit conferring antibiotic resistance; MuxA	antibiotic molecule	1000003	3000159	3004073	4	0	0	0	0	0	0	0	0	0	0	0	0	0	0	0	0	0	0	0	0	0	0	34	13.3195	0	0	0	0	0	0	0	0	4	0.379429	0	0	9791	103.689	0	0	14	0.390571	0
CARD_102279_TM_#01	efflux pump complex or subunit conferring antibiotic resistance; MuxB	antibiotic molecule	1000003	3000159	3004074	4	0	0	0	0	0	0	0	0	7	0.306571	0	0	5	0.228622	0	0	0	0	0	0	0	0	0	0	0	0	16	2.9131	167	12.3087	14	2.10937	16	1.49588	0	0	10864	115.114	91	2.91981	10	0.282699	52
CARD_102282_TM_#01	efflux pump complex or subunit conferring antibiotic resistance; MuxC	antibiotic molecule	1000003	3000159	3004075	4	6	0.0954169	0	0	6	0.630316	36	0.9881	315	13.2898	679	25.9578	910	40.061	143	4.04114	48	1.56916	0	0	52	16.5295	0	0	69	2.67188	35	6.10001	449	33.8016	4	0.585202	14	1.32511	52	21.9805	18553	193.492	129	4.06944	66	1.79304	1732
CARD_101460_TM_#01	efflux pump complex or subunit conferring antibiotic resistance; norA	ciprofloxacin, acriflavine, norfloxacin	0000036, 0000045, 3000662	3000159	3000391	4	0	0	0	0	0	0	0	0	0	0	4	0.153128	0	0	0	0	0	0	2	0.0870109	0	0	12	4.40719	14	0.534524	0	0	0	0	0	0	0	0	0	0	0	0	0	0	2	0.0566137	0
CARD_101100_TM_#01	efflux pump complex or subunit conferring antibiotic resistance; norB	ciprofloxacin, moxifloxacin, norfloxacin, sparfloxacin	0000036, 0000074, 3000662, 3000666	3000159	3000421	4	0	0	0	0	0	0	2391	67.6536	11	0.482153	12	0.480566	0	0	0	0	0	0	12	0.536724	0	0	0	0	0	0	0	0	0	0	0	0	53	5.10122	0	0	0	0	0	0	0	0	0
CARD_101138_TM_#02	efflux pump complex or subunit conferring antibiotic resistance; novA	novobiocin	3000111	3000159	3002522	4	0	0	0	0	0	0	2	0.0988557	8	0.609854	27	1.88864	0	0	0	0	0	0	5	0.403766	0	0	0	0	13	0.911911	53	16.8545	0	0	4	1.05417	0	0	2	1.5293	0	0	11	0.61781	0	0	0
CARD_101138_TM_#01	efflux pump complex or subunit conferring antibiotic resistance; novA	novobiocin	3000111	3000159	3002522	4	0	0	0	0	0	0	0	0	2	0.351933	0	0	0	0	0	0	0	0	0	0	5	6.57054	0	0	0	0	0	0	0	0	0	0	0	0	0	0	0	0	0	0	0	0	0
CARD_102021_TM_#01	efflux pump complex or subunit conferring antibiotic resistance; oleC	oleandomycin	3000867	3000159	3003748	4	0	0	2	0.680203	0	0	26	0.73538	113	4.9192	47	1.84317	18	0.823973	1	0.029335	2	0.0681558	171	7.82175	2	0.648609	0	0	0	0	2	0.364168	0	0	0	0	9	0.862721	2	0.89359	1	0.010739	59	1.92798	0	0	0
CARD_101959_TM_#01	efflux pump complex or subunit conferring antibiotic resistance; opcM	antibiotic molecule	1000003	3000159	3003037	4	0	0	1	0.340102	3	0.327581	0	0	0	0	0	0	0	0	0	0	0	0	0	0	0	0	2	0.782477	10	0.375277	0	0	0	0	0	0	0	0	4	1.66731	0	0	3	0.0955502	19	0.523563	4
CARD_102237_TM_#01	efflux pump complex or subunit conferring antibiotic resistance; OpmB	antibiotic molecule	1000003	3000159	3004072	4	0	0	0	0	0	0	0	0	0	0	0	0	2	0.0923768	0	0	0	0	0	0	0	0	0	0	0	0	0	0	0	0	0	0	0	0	0	0	8252	87.4615	0	0	7	0.198148	0
CARD_100411_TM_#01	efflux pump complex or subunit conferring antibiotic resistance; OpmD	antibiotic molecule	1000003	3000159	3000809	4	0	0	0	0	6	0.655162	0	0	0	0	0	0	0	0	0	0	0	0	0	0	0	0	0	0	0	0	0	0	0	0	0	0	0	0	0	0	6372	67.5014	0	0	0	0	0
CARD_101989_TM_#01	efflux pump complex or subunit conferring antibiotic resistance; opmE	antibiotic molecule	1000003	3000159	3003700	4	0	0	0	0	0	0	12	0.322802	6	0.248423	8	0.300358	0	0	12	0.32908	26	0.829013	0	0	0	0	8	3.134	0	0	4	0.728335	0	0	0	0	24	2.1843	0	0	8149	86.5519	6	0.185364	0	0	0
CARD_101980_TM_#01	efflux pump complex or subunit conferring antibiotic resistance; OpmH	antibiotic molecule	1000003	3000159	3003682	4	65	1.04896	0	0	29	3.05886	8	0.217069	4	0.165823	12	0.460542	32	1.40436	8	0.220629	28	0.907214	0	0	2	0.642007	1	0.366368	44	1.71551	0	0	12	0.891222	58	8.398	127	11.7424	4	1.67754	11905	125.92	198	6.23335	109	2.98994	49
CARD_100765_TM_#01	efflux pump complex or subunit conferring antibiotic resistance; OprJ	antibiotic molecule	1000003	3000159	3000802	4	0	0	0	0	0	0	6	0.164184	4	0.166023	0	0	0	0	0	0	0	0	0	0	0	0	0	0	0	0	0	0	0	0	4	0.567595	0	0	0	0	7060	74.7619	289	9.07475	10	0.269003	166
CARD_102272_TM_#01	efflux pump complex or subunit conferring antibiotic resistance; OprM	antibiotic molecule	1000003	3000159	3000379	4	0	0	0	0	0	0	2	0.0535268	0	0	0	0	0	0	0	0	2	0.063662	0	0	0	0	0	0	0	0	0	0	0	0	0	0	0	0	0	0	8853	93.741	18	0.558238	2	0.0528164	0
CARD_100305_TM_#01	efflux pump complex or subunit conferring antibiotic resistance; OprN	antibiotic molecule	1000003	3000159	3000805	4	0	0	0	0	6	0.611218	2	0.0538551	23	0.950281	2	0.0757144	113	4.91879	26	0.714278	21	0.67127	0	0	0	0	0	0	16	0.600442	0	0	0	0	2	0.283963	0	0	2	0.834672	7867	83.3257	57	1.77688	36	1.00316	43
CARD_102325_TM_#01	efflux pump complex or subunit conferring antibiotic resistance; OprZ	antibiotic molecule	1000003	3000159	3004142	4	0	0	0	0	0	0	0	0	0	0	0	0	0	0	0	0	0	0	0	0	0	0	0	0	0	0	0	0	0	0	0	0	2	0.194426	0	0	1165	12.3599	3	0.0980239	0	0	0
NCBI_205053_TM_#06	efflux pump complex or subunit conferring antibiotic resistance; oqxA	antibiotic molecule	1000003	3000159	3003922	4	11	0.924156	0	0	46	23.713	136	18.4992	2227	486.863	5121	976.165	2578	567.639	182	26.5246	270	43.7336	11	2.49847	38	61.7227	24	47.8974	41	6.7919	702	621.471	1977	718.655	220	165.899	5	2.47565	2890	6306.05	79898	4164.98	929	149.057	5727	766.151	9318
NCBI_205053_TM_#01	efflux pump complex or subunit conferring antibiotic resistance; oqxA	antibiotic molecule	1000003	3000159	3003922	4	0	0	0	0	10	39.7777	32	36.0073	272	455.374	688	1024.72	245	454.082	18	20.5712	33	46.4929	0	0	2	24.0294	0	0	0	0	46	306.447	536	1517.32	15	82.4508	0	0	417	7373.66	10244	4202.57	134	187.939	839	860.558	1556
NCBI_205053_TM_#03	efflux pump complex or subunit conferring antibiotic resistance; oqxA	antibiotic molecule	1000003	3000159	3003922	4	0	0	0	0	0	0	33	23.7375	363	466.623	1074	1121.08	578	640.252	17	16.8926	31	28.5176	8	7.5577	0	0	0	0	0	0	97	482.007	478	984.248	50	211.924	0	0	593	7807.39	17557	4943.75	160	163.958	226	155.923	2986
NCBI_205053_TM_#02	efflux pump complex or subunit conferring antibiotic resistance; oqxA	antibiotic molecule	1000003	3000159	3003922	4	0	0	0	0	0	0	0	0	54	73.1025	8	6.38254	9	7.92594	1	1.24674	0	0	0	0	0	0	0	0	0	0	0	0	8	7.90621	0	0	0	0	2	13.1461	2274	648.716	2	0.755906	0	0	342
NCBI_205053_TM_#07	efflux pump complex or subunit conferring antibiotic resistance; oqxA	antibiotic molecule	1000003	3000159	3003922	4	0	0	0	0	0	0	0	0	35	35.9055	3	2.68322	10	30.5869	0	0	3	2.21385	0	0	0	0	0	0	0	0	0	0	6	12.0463	0	0	0	0	0	0	1149	313.047	0	0	0	0	536
NCBI_206164_TM_#01	efflux pump complex or subunit conferring antibiotic resistance; oqxB	antibiotic molecule	1000003	3000159	3003923	4	370	132.69	0	0	5738	11149.6	470	293.357	2401	1979.71	10543	8974.18	2321	2418.56	3655	2079.53	1366	1000.37	2485	2520.35	210	1706.25	102	650.84	289	191.392	532	2488.77	16337	26507.3	278	703.492	312	510.852	2077	18492.3	60070	13472.2	1950	1353.33	14970	8519.57	9529
NCBI_206164_TM_#02	efflux pump complex or subunit conferring antibiotic resistance; oqxB	antibiotic molecule	1000003	3000159	3003923	4	90	5.73876	0	0	1019	423.553	268	27.8624	3817	634.735	11389	1699.06	2966	506.153	3415	377.361	984	124.576	166	28.1969	178	218.365	39	58.1069	205	29.8859	784	519.535	19952	5835.43	442	255.522	82	29.7766	4035	6751.9	99376	3944.13	1938	239.231	17459	1860.07	20329
NCBI_206164_TM_#03	efflux pump complex or subunit conferring antibiotic resistance; oqxB	antibiotic molecule	1000003	3000159	3003923	4	18289	1010.55	110	122.434	3660	1490.86	8160	777.363	14631	2443.82	36946	5542.4	16559	2830.67	9158	954.265	9163	1063.99	10811	1640.41	408	487.593	532	706.004	5952	793.081	2373	1676.31	26762	8131.5	2170	1212.76	3344	1085.94	13706	23720	374885	15400.6	21724	2515.23	43498	4693.04	58463
NCBI_206164_TM_#04	efflux pump complex or subunit conferring antibiotic resistance; oqxB	antibiotic molecule	1000003	3000159	3003923	4	300	234.75	0	0	983	7221.21	276	322.462	1672	4262.6	5063	9906.63	7101	14474.8	1922	3317.16	871	1348.01	1600	3313.46	257	4256.89	36	797.582	589	602.093	408	2013.21	9032	32796.9	174	1628.41	597	2590.69	1053	22135.7	40968	19397.6	5202	8211.25	7419	11076.3	4699
RESF_302944_TM_#07	efflux pump complex or subunit conferring antibiotic resistance; otrC	tetracycline	51	3000159	3002894	4	0	0	0	0	0	0	2	0.0870872	1	0.0736069	10	0.630878	8	0.593381	0	0	0	0	13	0.985922	0	0	0	0	1	0.0669611	0	0	0	0	0	0	0	0	0	0	0	0	7	0.353088	0	0	0
CARD_101948_TM_#01	efflux pump complex or subunit conferring antibiotic resistance; patA	antibiotic molecule	1000003	3000159	3000024	4	4	0.0676302	0	0	0	0	0	0	0	0	0	0	0	0	0	0	0	0	0	0	0	0	0	0	30	1.2053	0	0	0	0	0	0	0	0	0	0	0	0	0	0	0	0	10
CARD_101952_TM_#01	efflux pump complex or subunit conferring antibiotic resistance; patB	antibiotic molecule	1000003	3000159	3000025	4	0	0	0	0	0	0	0	0	0	0	0	0	10	0.461282	2	0.05867	0	0	0	0	0	0	0	0	0	0	6	1.06062	0	0	0	0	0	0	0	0	0	0	0	0	0	0	0
CARD_102294_TM_#01	efflux pump complex or subunit conferring antibiotic resistance; PmpM	neomycin, fluoroquinolone antibiotic, benzalkonium chloride	0000005, 0000001, 3003823	3000159	3004077	4	0	0	0	0	0	0	0	0	0	0	0	0	0	0	0	0	2	0.065999	0	0	0	0	0	0	0	0	0	0	0	0	0	0	0	0	0	0	10268	108.804	0	0	12	0.329768	2
NCBI_204388_TM_#02	efflux pump complex or subunit conferring antibiotic resistance; pmrA	ciprofloxacin, norfloxacin	0000036, 3000662	3000159	3000822	4	0	0	3	3.46904	0	0	0	0	0	0	0	0	0	0	0	0	0	0	0	0	0	0	0	0	0	0	0	0	0	0	0	0	0	0	0	0	0	0	0	0	0	0	0
CARD_102242_TM_#01	efflux pump complex or subunit conferring antibiotic resistance; Pseudomonas aeruginosa emrE	gentamicin C	14	3000159	3004038	5	0	0	0	0	0	0	0	0	0	0	0	0	0	0	0	0	0	0	0	0	0	0	0	0	0	0	0	0	0	0	0	0	0	0	0	0	4138	166.781	0	0	16	1.62266	0
RESF_302353_TM_#05	efflux pump complex or subunit conferring antibiotic resistance; qacA	fluoroquinolone antibiotic	1	3000159	3003046	4	0	0	12	14.9384	0	0	0	0	0	0	0	0	0	0	0	0	0	0	0	0	0	0	0	0	8	1.1936	0	0	0	0	0	0	0	0	0	0	0	0	0	0	0	0	0
RESF_302353_TM_#04	efflux pump complex or subunit conferring antibiotic resistance; qacA	fluoroquinolone antibiotic	1	3000159	3003046	4	0	0	0	0	0	0	0	0	0	0	0	0	3	1.47418	0	0	0	0	0	0	0	0	0	0	6	2.56126	0	0	0	0	0	0	0	0	0	0	0	0	0	0	0	0	1
RESF_302353_TM_#06	efflux pump complex or subunit conferring antibiotic resistance; qacA	fluoroquinolone antibiotic	1	3000159	3003046	4	0	0	0	0	0	0	0	0	0	0	0	0	12	6.63381	0	0	0	0	0	0	0	0	0	0	0	0	0	0	0	0	0	0	0	0	0	0	0	0	0	0	0	0	0
RESF_302353_TM_#03	efflux pump complex or subunit conferring antibiotic resistance; qacA	fluoroquinolone antibiotic	1	3000159	3003046	4	0	0	0	0	0	0	0	0	0	0	0	0	0	0	0	0	0	0	0	0	0	0	10	16.5483	0	0	46	33.0285	0	0	0	0	0	0	0	0	0	0	0	0	0	0	0
CARD_102633_TM_#01	efflux pump complex or subunit conferring antibiotic resistance; qacE	disinfecting agents and intercalating dyes	3005386	3000159	3005009	4	0	0	16109	156795	34	69.1618	26	17.7042	16	10.8464	103	116.099	303	425.842	0	0	0	0	1	2.358	0	0	72	1182.62	15	28.6861	29	106.071	18	27.5244	21	101.228	30	83.468	2	10.5169	9	3.45187	23	13.8119	2	2.8873	2
NCBI_202095_TM_#01	efflux pump complex or subunit conferring antibiotic resistance; qacE	disinfecting agents and intercalating dyes	3005386	3000159	3005009	4	0	0	3575	4588.7	53	22.5148	37	3.93795	0	0	0	0	7	1.21696	37053	4082.62	0	0	60	10.26	22	26.8118	48	70.171	259	34.7596	8190	5627.4	4	1.23552	26	14.6498	501	180.31	0	0	0	0	97	12.1784	0	0	26
CARD_102633_TM_#03	efflux pump complex or subunit conferring antibiotic resistance; qacE	disinfecting agents and intercalating dyes	3005386	3000159	3005009	4	0	0	0	0	14	21.7735	13	5.40435	1	0.625659	257	297.501	633	697.359	0	0	7	4.27597	10	44.8019	18	84.103	369	2640	131	100.909	85	322.489	14	15.6156	54	115.552	46	71.2952	0	0	62	26.4676	43	22.6064	21	8.42129	24
NCBI_205466_TM_#02	efflux pump complex or subunit conferring antibiotic resistance; qacL	disinfecting agents and intercalating dyes	3005386	3000159	3005098	4	0	0	106	321.93	51	48.99	14	3.83273	8	3.22178	5	1.7771	11	5.57248	2	0.518891	6	2.74417	0	0	0	0	58	199.833	89	31.454	35	71.1998	4	7.08609	13	19.7929	48	41.8087	0	0	174	17.8447	153	54.0014	3	0.746715	4
NCBI_202919_TM_#01	efflux pump complex or subunit conferring antibiotic resistance; QepA1	ciprofloxacin, norfloxacin	0000036, 3000662	3000159	3000448	4	0	0	0	0	6	2.76443	0	0	0	0	2	0.417717	97	21.2642	0	0	0	0	0	0	0	0	0	0	0	0	0	0	5	1.52872	0	0	0	0	0	0	7	0.391206	38	6.26828	113	14.9234	14
NCBI_202919_TM_#03	efflux pump complex or subunit conferring antibiotic resistance; QepA1	ciprofloxacin, norfloxacin	0000036, 3000662	3000159	3000448	4	0	0	0	0	0	0	0	0	0	0	0	0	78	115.076	0	0	0	0	0	0	0	0	0	0	0	0	0	0	0	0	0	0	0	0	0	0	0	0	0	0	0	0	0
CARD_102697_TM_#01	efflux pump complex or subunit conferring antibiotic resistance; RanA	antibiotic molecule	1000003	3000159	3005091	4	0	0	8	2.99917	12	1.5636	0	0	0	0	30	1.42334	0	0	0	0	0	0	31	1.69592	2	0.771587	0	0	0	0	0	0	0	0	0	0	2	0.232764	0	0	0	0	0	0	0	0	0
CARD_102696_TM_#01	efflux pump complex or subunit conferring antibiotic resistance; RanB	antibiotic molecule	1000003	3000159	3005090	4	0	0	0	0	1	0.133867	4	0.140679	0	0	44	2.13831	0	0	0	0	0	0	52	2.90086	0	0	0	0	0	0	0	0	0	0	0	0	0	0	0	0	0	0	4	0.162326	0	0	0
ARGA_402196_TM_#02	efflux pump complex or subunit conferring antibiotic resistance; Rhodococcus fascians cmr	chloramphenicol	3000385	3000159	3002701	4	0	0	0	0	0	0	5	1.99952	2	0.877548	278	116.911	0	0	0	0	0	0	0	0	0	0	0	0	0	0	24	37.1973	0	0	4	5.13027	0	0	36	142.533	0	0	16	6.3657	0	0	0
ARGA_402196_TM_#07	efflux pump complex or subunit conferring antibiotic resistance; Rhodococcus fascians cmr	chloramphenicol	3000385	3000159	3002701	4	0	0	0	0	0	0	13	4.58427	0	0	176	76.5361	28	13.4218	0	0	0	0	0	0	0	0	0	0	0	0	0	0	0	0	11	16.9299	0	0	25	113.933	0	0	18	6.36691	0	0	0
ARGA_402196_TM_#08	efflux pump complex or subunit conferring antibiotic resistance; Rhodococcus fascians cmr	chloramphenicol	3000385	3000159	3002701	4	0	0	0	0	0	0	7	1.89657	0	0	358	154.79	2	0.873588	0	0	0	0	0	0	0	0	0	0	0	0	73	125.601	0	0	36	51.3205	0	0	30	132.906	0	0	69	25.9579	0	0	0
ARGA_402196_TM_#10	efflux pump complex or subunit conferring antibiotic resistance; Rhodococcus fascians cmr	chloramphenicol	3000385	3000159	3002701	4	0	0	0	0	0	0	1	0.562717	0	0	215	198.514	0	0	0	0	0	0	0	0	0	0	0	0	0	0	0	0	0	0	29	85.9934	0	0	49	515.137	0	0	20	28.0499	0	0	0
ARGA_402196_TM_#13	efflux pump complex or subunit conferring antibiotic resistance; Rhodococcus fascians cmr	chloramphenicol	3000385	3000159	3002701	4	0	0	0	0	0	0	9	2.63747	6	2.70285	142	71.0909	0	0	0	0	0	0	0	0	0	0	0	0	0	0	8	14.858	0	0	3	4.61725	0	0	34	160.89	0	0	33	11.3076	0	0	0
CARD_101186_TM_#01	efflux pump complex or subunit conferring antibiotic resistance; rosA	antibiotic molecule	1000003	3000159	3003048	4	96	1.60947	0	0	7407	802.997	2193	61.9359	88	3.8555	29510	1170.65	0	0	591	17.1951	6738	227.193	90	4.11879	121	39.8284	153	59.1315	2700	107.422	1	0.182084	973	75.7152	0	0	1945	186.672	0	0	0	0	837	27.3619	795	22.3325	0
CARD_100476_TM_#01	efflux pump complex or subunit conferring antibiotic resistance; rosB	antibiotic molecule	1000003	3000159	3003049	4	727	12.1054	10	3.40057	42418	4599.32	6700	189.645	404	17.7419	137941	5469.02	0	0	1718	50.0042	35847	1210.12	773	35.2196	210	68.6142	577	225.599	13555	539.464	103	18.481	3912	304.829	2	0.301781	9638	925.178	0	0	12	0.127351	6039	197.297	4732	132.875	12
CARD_101416_TM_#01	efflux pump complex or subunit conferring antibiotic resistance; smeA	antibiotic molecule	1000003	3000159	3003051	4	14	0.23399	0	0	0	0	0	0	142	6.22406	46	1.83397	10442	476.304	0	0	0	0	0	0	16	5.26063	92	36.0379	0	0	9	1.63875	4	0.300408	0	0	0	0	146	64.4429	43880	465.955	326	10.6277	0	0	368
CARD_101850_TM_#01	efflux pump complex or subunit conferring antibiotic resistance; smeB	antibiotic molecule	1000003	3000159	3003052	4	23	0.388874	0	0	0	0	0	0	330	14.3489	143	5.6252	19334	882.127	0	0	0	0	0	0	71	23.2793	38	14.2978	14	0.562473	30	5.4592	8	0.629874	11	1.64904	2	0.194426	334	147.479	154475	1638.38	546	17.8376	0	0	563
CARD_101189_TM_#01	efflux pump complex or subunit conferring antibiotic resistance; smeC	antibiotic molecule	1000003	3000159	3003053	4	0	0	0	0	0	0	0	0	74	3.23536	54	2.16007	6664	304.183	1	0.0286973	0	0	0	0	30	9.87684	0	0	0	0	14	2.53484	0	0	5	0.754255	0	0	70	30.9889	50706	538.33	159	5.18584	0	0	186
CARD_100264_TM_#01	efflux pump complex or subunit conferring antibiotic resistance; smeD	antibiotic molecule	1000003	3000159	3003055	4	3	0.0507227	0	0	15	1.54563	0	0	556	24.1584	75	2.96584	18906	859.237	23	0.663247	62	2.09053	0	0	25	8.06374	0	0	212	8.49213	39	7.10127	0	0	72	10.8562	34	3.28134	139	61.3439	111524	1180.85	3707	120.191	1181	32.8021	375
CARD_100824_TM_#01	efflux pump complex or subunit conferring antibiotic resistance; smeE	antibiotic molecule	1000003	3000159	3003056	4	93	1.53266	0	0	239	25.9224	7	0.20044	3136	136.813	278	10.8372	73944	3362.46	391	11.3516	474	15.8661	0	0	167	54.0814	52	20.3373	94	3.74259	126	22.3942	31	2.40379	57	8.47083	1036	99.1005	292	127.731	236273	2502.27	26264	853.129	11804	329.295	1503
CARD_100592_TM_#01	efflux pump complex or subunit conferring antibiotic resistance; smeF	antibiotic molecule	1000003	3000159	3003057	4	21	0.352809	0	0	7	0.764355	0	0	155	6.8062	83	3.30632	18819	859.489	5	0.146675	11	0.370543	0	0	25	8.10954	16	6.26698	64	2.5712	71	12.927	33	2.58064	0	0	38	3.64545	198	87.5497	78389	831.892	1007	32.9019	283	7.87131	320
CARD_102133_TM_#01	efflux pump complex or subunit conferring antibiotic resistance; Staphylococcus aureus norA	enoxacin, ciprofloxacin, norfloxacin, ofloxacin	0000023, 0000036, 3000662, 3000663	3000159	3004667	4	0	0	0	0	0	0	0	0	0	0	0	0	4	0.184995	0	0	0	0	0	0	0	0	0	0	0	0	0	0	0	0	0	0	0	0	0	0	0	0	0	0	0	0	0
CARD_102160_TM_#01	efflux pump complex or subunit conferring antibiotic resistance; TaeA	pleuromutilin	3001317	3000159	3003986	4	2	0.0338151	0	0	0	0	0	0	0	0	0	0	57	2.61148	0	0	0	0	2	0.0924704	0	0	0	0	0	0	0	0	2	0.153457	5	0.754452	0	0	2	0.870824	2	0.021038	7	0.223902	0	0	60
CARD_101618_TM_#01	efflux pump complex or subunit conferring antibiotic resistance; tap	tetracycline	51	3000159	3000343	4	17	0.27527	16	5.44163	22	2.40226	20	0.563471	97	4.24241	34	1.3459	54	2.46782	0	0	6	0.202816	40	1.83756	0	0	0	0	53	2.10691	69	12.102	0	0	0	0	0	0	2	0.89359	12	0.124974	34	1.10754	15	0.424492	0
CARD_101829_TM_#01	efflux pump complex or subunit conferring antibiotic resistance; tet(30)	tetracycline	51	3000159	3000561	4	103	1.70916	0	0	13	1.39537	20	0.561479	41	1.80458	38	1.50444	504	23.0093	0	0	0	0	2	0.0921092	155	50.794	0	0	208	8.29862	211	38.1822	6	0.471789	2	0.301584	10	0.942185	20	8.79116	117	1.24461	27	0.879727	68	1.9116	2
CARD_100609_TM_#01	efflux pump complex or subunit conferring antibiotic resistance; tet(31)	tetracycline	51	3000159	3000476	4	0	0	0	0	0	0	0	0	0	0	6	0.23946	0	0	0	0	0	0	0	0	0	0	0	0	0	0	0	0	0	0	764	114.406	10	0.968139	0	0	0	0	0	0	0	0	0
NCBI_202842_TM_#01	efflux pump complex or subunit conferring antibiotic resistance; tet(33)	tetracycline	51	3000159	3000478	4	11	0.277343	44	22.3125	0	0	181	7.63754	0	0	53	3.0905	194	13.2219	0	0	0	0	4	0.275789	30	14.7359	0	0	0	0	0	0	0	0	20	4.48575	8	1.15945	1	0.601758	0	0	6	0.288409	0	0	0
NCBI_202842_TM_#02	efflux pump complex or subunit conferring antibiotic resistance; tet(33)	tetracycline	51	3000159	3000478	4	0	0	52	204.93	0	0	7	2.2401	0	0	3	1.39555	10	5.36066	0	0	0	0	0	0	2	7.64572	0	0	0	0	0	0	0	0	0	0	0	0	0	0	0	0	1	0.383679	0	0	0
NCBI_205127_TM_#01	efflux pump complex or subunit conferring antibiotic resistance; tet(35)	tetracycline	51	3000159	3000481	4	0	0	914	631.666	166	36.8895	0	0	0	0	0	0	0	0	0	0	0	0	0	0	0	0	0	0	0	0	4600	1697.12	339	53.3174	0	0	0	0	5	4.63141	1493	31.8432	0	0	0	0	229
NCBI_205127_TM_#02	efflux pump complex or subunit conferring antibiotic resistance; tet(35)	tetracycline	51	3000159	3000481	4	0	0	10	70.3183	0	0	0	0	0	0	0	0	0	0	0	0	0	0	0	0	0	0	0	0	0	0	93	329.848	6	11.0744	0	0	0	0	0	0	223	60.3198	0	0	0	0	28
NCBI_205127_TM_#05	efflux pump complex or subunit conferring antibiotic resistance; tet(35)	tetracycline	51	3000159	3000481	4	0	0	0	0	1	1.32592	0	0	0	0	0	0	0	0	0	0	0	0	0	0	0	0	0	0	0	0	0	0	0	0	0	0	0	0	0	0	237	34.5049	0	0	0	0	13
NCBI_205127_TM_#03	efflux pump complex or subunit conferring antibiotic resistance; tet(35)	tetracycline	51	3000159	3000481	4	0	0	0	0	0	0	0	0	0	0	0	0	0	0	0	0	0	0	0	0	0	0	0	0	0	0	0	0	0	0	0	0	0	0	0	0	297	38.3172	0	0	0	0	28
NCBI_204689_TM_#02	efflux pump complex or subunit conferring antibiotic resistance; tet(38)	tetracycline	51	3000159	3000565	4	0	0	0	0	0	0	0	0	0	0	0	0	10	1.38593	0	0	0	0	0	0	0	0	0	0	0	0	0	0	0	0	0	0	0	0	0	0	0	0	0	0	0	0	0
ARGA_401721_TM_#01	efflux pump complex or subunit conferring antibiotic resistance; tet(39)	tetracycline	51	3000159	3000566	4	977	16.2044	0	0	104	11.1005	38	1.06351	11	0.480813	10408	411.086	56127	2553.55	0	0	450	15.115	0	0	0	0	12703	4914.94	812	32.5351	46	7.88085	0	0	120658	18026.2	571	54.5275	441	195.083	25281	267.251	3892	126.649	3566	99.5732	9901
RESF_302926_TM_#02	efflux pump complex or subunit conferring antibiotic resistance; tet(40)	tetracycline	51	3000159	3000567	4	5	0.345104	10	15.2062	0	0	68	7.80947	0	0	181	30.9175	0	0	20	2.30904	2	0.303135	3	0.576243	287	402.341	0	0	1930	328.877	52	42.0387	3	1.0105	122	80.9105	9	3.56972	0	0	5	0.220997	96	13.3447	0	0	0
RESF_302926_TM_#04	efflux pump complex or subunit conferring antibiotic resistance; tet(40)	tetracycline	51	3000159	3000567	4	11	1.04698	9	17.3452	0	0	46	7.0765	0	0	111	23.2442	0	0	10	1.65987	2	0.386216	0	0	252	438.157	0	0	943	193.124	40	35.7364	0	0	139	116.096	7	3.4035	0	0	9	0.502194	73	12.7606	0	0	0
RESF_302926_TM_#01	efflux pump complex or subunit conferring antibiotic resistance; tet(40)	tetracycline	51	3000159	3000567	4	0	0	0	0	0	0	4	3.53574	0	0	39	37.0042	0	0	16	9.1947	0	0	0	0	23	321.657	0	0	497	594.087	14	97.2503	0	0	1	6.41284	0	0	0	0	0	0	22	14.6847	0	0	0
RESF_302926_TM_#05	efflux pump complex or subunit conferring antibiotic resistance; tet(40)	tetracycline	51	3000159	3000567	4	0	0	0	0	0	0	21	10.2525	0	0	22	15.01	0	0	1	0.498695	0	0	16	12.6705	48	368.706	0	0	150	151.436	0	0	2	2.67697	47	178.335	0	0	2	18.9888	0	0	16	24.7729	0	0	0
CARD_101523_TM_#01	efflux pump complex or subunit conferring antibiotic resistance; tet(41)	tetracycline	51	3000159	3000569	4	0	0	0	0	0	0	0	0	13	0.572152	30	1.1928	35	1.60746	0	0	0	0	0	0	0	0	0	0	0	0	0	0	0	0	0	0	0	0	65	28.7524	1324	14.0368	4	0.132407	10	0.26502	2
CARD_100151_TM_#01	efflux pump complex or subunit conferring antibiotic resistance; tet(42)	tetracycline	51	3000159	3000572	4	57	0.951919	3	1.0203	428	46.4637	38	1.06733	1932	84.7747	522	20.6786	19567	893.188	280	8.10676	495	16.6419	24	1.10429	312	101.484	0	0	787	31.2753	2789	500.074	551	42.9748	256	38.3477	103	9.86174	666	294.851	1840	19.5311	13786	450.193	7330	205.336	68
CARD_101677_TM_#01	efflux pump complex or subunit conferring antibiotic resistance; tet(43)	tetracycline	51	3000159	3000573	4	0	0	0	0	0	0	31	0.844946	8	0.353313	12	0.457317	4	0.180742	0	0	0	0	0	0	0	0	0	0	0	0	0	0	0	0	0	0	0	0	4	1.68799	0	0	3	0.0993053	0	0	0
RESF_302937_TM_#01	efflux pump complex or subunit conferring antibiotic resistance; tet(45)	tetracycline	51	3000159	3003196	4	0	0	0	0	0	0	53	1.42767	0	0	29	1.09461	59	2.56359	0	0	0	0	22	0.959131	2	0.617647	0	0	20	0.749638	0	0	0	0	12	1.69544	0	0	38	16.0351	24	0.248495	0	0	0	0	18
CARD_102397_TM_#01	efflux pump complex or subunit conferring antibiotic resistance; tet(59)	tetracycline, chlortetracycline, oxytetracycline	0000051, 3000528, 3000668	3000159	3004441	4	0	0	19	16.9066	0	0	0	0	0	0	12	1.19232	0	0	0	0	0	0	0	0	6	5.36827	0	0	0	0	49	23.3091	21	4.42554	35	13.6148	4	1.05487	0	0	39	1.10801	0	0	0	0	412
CARD_102397_TM_#02	efflux pump complex or subunit conferring antibiotic resistance; tet(59)	tetracycline, chlortetracycline, oxytetracycline	0000051, 3000528, 3000668	3000159	3004441	4	0	0	8	12.8483	0	0	0	0	0	0	0	0	0	0	0	0	0	0	0	0	0	0	0	0	0	0	22	15.8483	1	0.371801	11	7.67001	3	1.37437	0	0	7	0.313843	0	0	0	0	116
CARD_102397_TM_#03	efflux pump complex or subunit conferring antibiotic resistance; tet(59)	tetracycline, chlortetracycline, oxytetracycline	0000051, 3000528, 3000668	3000159	3004441	4	0	0	14	60.7081	0	0	0	0	0	0	10	4.51503	0	0	0	0	0	0	0	0	0	0	0	0	0	0	20	54.6252	0	0	16	31.2556	0	0	0	0	2	0.165966	0	0	0	0	79
ARGA_401728_TM_#04	efflux pump complex or subunit conferring antibiotic resistance; tet(A)	tetracycline	51	3000159	3000165	4	2	0.718571	1	7.22716	0	0	0	0	53	55.6706	44	55.2447	1515	1802.74	21	13.0908	130	107.666	0	0	0	0	0	0	145	141.759	28	130.098	0	0	333	1322.71	19	48.6934	0	0	95	26.9646	120	115.672	0	0	26
ARGA_401728_TM_#05	efflux pump complex or subunit conferring antibiotic resistance; tet(A)	tetracycline	51	3000159	3000165	4	2	0.307959	0	0	0	0	0	0	155	88.9685	210	101.138	5437	2881.86	180	56.8329	641	234.461	0	0	0	0	0	0	265	107.728	30	49.7479	0	0	1373	2184.97	112	134.042	0	0	367	39.4575	594	214.05	52	16.5907	58
ARGA_401728_TM_#12	efflux pump complex or subunit conferring antibiotic resistance; tet(A)	tetracycline	51	3000159	3000165	4	7	1.44045	5	20.649	4	5.32507	10	3.48349	87	51.1435	111	78.0408	3460	2436.27	149	60.5495	484	284.032	0	0	0	0	0	0	1059	585.322	16	35.4868	0	0	685	1467.85	36	42.5151	0	0	386	58.7476	357	174.735	36	12.3965	8
ARGA_401728_TM_#09	efflux pump complex or subunit conferring antibiotic resistance; tet(A)	tetracycline	51	3000159	3000165	4	0	0	4	11.5635	0	0	4	0.975377	164	70.1362	146	51.0374	5718	2678.73	220	61.4393	777	249.492	0	0	0	0	0	0	296	142.969	70	118.268	0	0	1369	1941.09	87	85.3653	0	0	581	58.8962	718	235.836	29	7.44712	80
ARGA_401728_TM_#01	efflux pump complex or subunit conferring antibiotic resistance; tet(A)	tetracycline	51	3000159	3000165	4	0	0	0	0	0	0	0	0	35	16.8238	28	12.1793	1227	741.518	63	18.9838	149	56.9324	0	0	2	6.72824	0	0	68	32.2074	14	26.0016	0	0	204	351.23	22	21.9084	0	0	157	21.8226	109	45.0009	0	0	16
ARGA_401728_TM_#02	efflux pump complex or subunit conferring antibiotic resistance; tet(A)	tetracycline	51	3000159	3000165	4	0	0	0	0	0	0	0	0	76	31.5411	168	74.7167	3380	1761.85	124	35.41	419	146.325	0	0	2	6.00735	0	0	469	175.885	7	11.6078	0	0	811	1220.58	47	43.6347	0	0	346	37.69	367	122.666	7	1.80456	29
NCBI_205402_TM_#06	efflux pump complex or subunit conferring antibiotic resistance; tet(B)	tetracycline	51	3000159	3000166	4	0	0	3	10.8407	0	0	0	0	0	0	25	12.8377	152	80.2984	0	0	0	0	0	0	0	0	0	0	0	0	18	34.8508	0	0	13	22.1243	12	26.2513	0	0	21	3.0893	10	3.52201	0	0	8
NCBI_205402_TM_#07	efflux pump complex or subunit conferring antibiotic resistance; tet(B)	tetracycline	51	3000159	3000166	4	0	0	3	23.6525	0	0	0	0	0	0	15	11.9885	108	104.792	0	0	0	0	0	0	0	0	0	0	0	0	83	349.477	0	0	2	6.99583	10	12.6482	0	0	18	3.86998	0	0	0	0	0
NCBI_205402_TM_#10	efflux pump complex or subunit conferring antibiotic resistance; tet(B)	tetracycline	51	3000159	3000166	4	0	0	14	55.3124	0	0	0	0	0	0	14	7.72207	76	41.7656	0	0	0	0	0	0	0	0	0	0	0	0	40	96.8457	0	0	8	13.9917	1	1.12679	0	0	12	1.97014	3	1.15104	0	0	2
NCBI_205402_TM_#11	efflux pump complex or subunit conferring antibiotic resistance; tet(B)	tetracycline	51	3000159	3000166	4	0	0	33	236.5	0	0	0	0	0	0	17	12.0382	85	69.6807	0	0	0	0	0	0	0	0	0	0	0	0	2	5.46252	0	0	17	38.5223	3	5.7078	0	0	8	1.28868	10	9.56016	0	0	2
NCBI_205402_TM_#05	efflux pump complex or subunit conferring antibiotic resistance; tet(B)	tetracycline	51	3000159	3000166	4	0	0	0	0	0	0	0	0	0	0	4	4.93096	89	102.504	0	0	0	0	0	0	0	0	0	0	0	0	0	0	0	0	13	45.6985	15	45.0716	0	0	25	7.97104	3	2.30208	0	0	0
NCBI_205402_TM_#08	efflux pump complex or subunit conferring antibiotic resistance; tet(B)	tetracycline	51	3000159	3000166	4	0	0	0	0	0	0	0	0	0	0	3	2.37849	153	144.074	0	0	0	0	0	0	0	0	0	0	0	0	36	238.187	0	0	4	8.71178	5	13.2334	0	0	4	1.56483	7	5.52871	0	0	3
NCBI_205402_TM_#09	efflux pump complex or subunit conferring antibiotic resistance; tet(B)	tetracycline	51	3000159	3000166	4	0	0	0	0	0	0	0	0	0	0	25	9.74165	246	104.746	0	0	0	0	0	0	0	0	18	58.0043	0	0	116	181.684	0	0	13	16.1355	21	25.7154	0	0	18	1.7468	5	1.44212	0	0	8
NCBI_205260_TM_#04	efflux pump complex or subunit conferring antibiotic resistance; tet(C)	tetracycline	51	3000159	3000167	4	3	0.646714	103	395.229	2	2.78444	10	2.56567	0	0	52	22.8465	42	24.0871	0	0	0	0	20	7.60733	0	0	0	0	0	0	0	0	0	0	18	20.3592	1	1.23947	0	0	2	0.2716	6	2.53228	0	0	95
NCBI_205260_TM_#07	efflux pump complex or subunit conferring antibiotic resistance; tet(C)	tetracycline	51	3000159	3000167	4	0	0	29	128.491	0	0	2	0.731532	0	0	0	0	34	61.9156	0	0	0	0	2	1.179	0	0	0	0	0	0	0	0	0	0	9	17.3147	0	0	0	0	4	0.55001	0	0	0	0	66
NCBI_205260_TM_#09	efflux pump complex or subunit conferring antibiotic resistance; tet(C)	tetracycline	51	3000159	3000167	4	0	0	0	0	0	0	3	2.40941	0	0	2	2.31797	18	17.9204	0	0	0	0	5	6.54999	0	0	0	0	0	0	0	0	0	0	0	0	1	2.75437	0	0	4	1.82563	0	0	0	0	20
NCBI_200433_TM_#01	efflux pump complex or subunit conferring antibiotic resistance; tet(D)	tetracycline	51	3000159	3000168	4	0	0	0	0	20	5.25283	0	0	0	0	0	0	327	34.7705	0	0	0	0	0	0	0	0	0	0	0	0	0	0	0	0	0	0	16	3.4364	0	0	714	17.8783	0	0	0	0	1165
NCBI_200433_TM_#02	efflux pump complex or subunit conferring antibiotic resistance; tet(D)	tetracycline	51	3000159	3000168	4	0	0	0	0	0	0	0	0	2	2.04761	0	0	17	16.9386	0	0	0	0	0	0	0	0	0	0	0	0	0	0	2	3.34621	0	0	1	2.06578	0	0	59	20.2026	0	0	0	0	1
NCBI_200433_TM_#03	efflux pump complex or subunit conferring antibiotic resistance; tet(D)	tetracycline	51	3000159	3000168	4	0	0	0	0	0	0	0	0	0	0	0	0	63	36.7625	0	0	0	0	0	0	0	0	0	0	0	0	0	0	0	0	0	0	10	13.8032	0	0	121	17.8484	0	0	0	0	213
NCBI_200433_TM_#04	efflux pump complex or subunit conferring antibiotic resistance; tet(D)	tetracycline	51	3000159	3000168	4	0	0	0	0	0	0	0	0	0	0	0	0	43	74.2567	0	0	0	0	0	0	0	0	0	0	0	0	0	0	0	0	0	0	0	0	0	0	101	30.283	0	0	0	0	49
NCBI_206013_TM_#02	efflux pump complex or subunit conferring antibiotic resistance; tet(E)	tetracycline	51	3000159	3000173	4	64	5.39216	3129	5450.36	0	0	10521	1483.42	62	14.0947	13	2.46117	0	0	34	4.99142	111	18.6097	42	10.1349	0	0	251	467.941	689	124.835	0	0	0	0	16	11.8906	79	37.857	0	0	4	0.228204	827	134.255	0	0	23
NCBI_206013_TM_#03	efflux pump complex or subunit conferring antibiotic resistance; tet(E)	tetracycline	51	3000159	3000173	4	1	0.159682	1288	4722.6	0	0	4227	1404.93	18	7.59933	4	1.51616	0	0	12	3.35269	33	10.762	30	14.3485	0	0	0	0	63	31.0634	0	0	0	0	13	19.1215	30	36.6152	0	0	0	0	364	133.823	0	0	0
NCBI_206013_TM_#04	efflux pump complex or subunit conferring antibiotic resistance; tet(E)	tetracycline	51	3000159	3000173	4	4	1.55626	626	3874.73	0	0	3467	1650.93	14	12.2694	0	0	0	0	0	0	45	25.1318	18	13.7605	0	0	0	0	184	129.756	0	0	0	0	18	40.8482	20	32.9394	0	0	0	0	216	111.779	5	3.28102	0
NCBI_206013_TM_#05	efflux pump complex or subunit conferring antibiotic resistance; tet(E)	tetracycline	51	3000159	3000173	4	51	5.53297	2671	5673	0	0	8299	1439.01	45	13.1543	0	0	0	0	12	2.09266	97	20.325	49	13.3531	6	13.2794	159	415.637	896	227.704	0	0	0	0	58	51.4255	51	31.0881	0	0	0	0	780	154.271	45	7.94554	1
NCBI_206013_TM_#07	efflux pump complex or subunit conferring antibiotic resistance; tet(E)	tetracycline	51	3000159	3000173	4	0	0	296	1309.96	0	0	1385	564.066	0	0	0	0	0	0	2	0.975708	18	7.69495	4	1.99267	0	0	26	139.238	20	9.03975	0	0	0	0	2	4.91196	6	7.19691	0	0	0	0	87	46.0529	44	17.0355	6
RESF_302956_TM_#02	efflux pump complex or subunit conferring antibiotic resistance; tet(G)	tetracycline	51	3000159	3000174	4	0	0	8	63.3198	0	0	10	14.9632	0	0	2	1.86074	451	595.879	0	0	4	4.73993	2	2.14363	0	0	0	0	0	0	0	0	0	0	96	365.16	0	0	0	0	7	2.71355	20	36.9559	32	21.019	0
RESF_302956_TM_#05	efflux pump complex or subunit conferring antibiotic resistance; tet(G)	tetracycline	51	3000159	3000174	4	0	0	67	527.32	0	0	34	16.2089	0	0	2	1.20401	863	818.128	2	0.880051	4	2.04468	0	0	8	39.5779	26	153.022	0	0	5	13.6563	0	0	307	939.129	0	0	0	0	19	3.06062	36	33.029	0	0	0
RESF_302956_TM_#06	efflux pump complex or subunit conferring antibiotic resistance; tet(G)	tetracycline	51	3000159	3000174	4	0	0	24	189.22	0	0	0	0	0	0	1	0.93037	584	741.982	0	0	0	0	1	1.07182	4	30.5829	0	0	0	0	0	0	0	0	178	689.364	4	9.01431	0	0	2	0.497899	28	23.6724	14	9.22787	0
RESF_302956_TM_#07	efflux pump complex or subunit conferring antibiotic resistance; tet(G)	tetracycline	51	3000159	3000174	4	0	0	12	37.1683	0	0	29	7.84262	0	0	9	3.28952	1251	600.421	0	0	1	0.310352	0	0	20	60.1097	0	0	0	0	0	0	0	0	394	597.727	10	8.85334	0	0	9	0.881393	51	15.7504	97	32.7091	0
RESF_302956_TM_#08	efflux pump complex or subunit conferring antibiotic resistance; tet(G)	tetracycline	51	3000159	3000174	4	0	0	35	98.6932	0	0	2	0.353967	0	0	6	2.45618	994	398.677	0	0	1	0.347595	0	0	17	49.2522	61	236.497	0	0	0	0	0	0	330	458.675	3	2.97472	0	0	38	3.15922	63	18.3287	77	18.2635	0
RESF_302968_TM_#01	efflux pump complex or subunit conferring antibiotic resistance; tet(H)	tetracycline	51	3000159	3000175	4	2	0.084815	6	5.71819	3499	1050.05	0	0	0	0	226	24.5657	1	0.129598	0	0	0	0	0	0	486	440.663	929	981.452	231	24.9533	0	0	0	0	13697	5676.5	293	77.5223	0	0	0	0	0	0	0	0	15
RESF_302968_TM_#02	efflux pump complex or subunit conferring antibiotic resistance; tet(H)	tetracycline	51	3000159	3000175	4	0	0	0	0	1080	420.669	0	0	0	0	52	7.3606	0	0	0	0	0	0	0	0	142	169.273	530	741.005	22	2.91842	0	0	0	0	5644	3034.73	155	53.1066	0	0	0	0	0	0	0	0	5
RESF_302968_TM_#03	efflux pump complex or subunit conferring antibiotic resistance; tet(H)	tetracycline	51	3000159	3000175	4	0	0	0	0	274	1197.32	0	0	0	0	10	5.01957	1	2.35869	0	0	0	0	0	0	29	313.87	89	1154.16	0	0	0	0	0	0	1260	7690.65	45	165.312	0	0	0	0	0	0	0	0	0
CARD_101066_TM_#01	efflux pump complex or subunit conferring antibiotic resistance; tet(J)	tetracycline	51	3000159	3000177	4	0	0	0	0	6	3.8186	0	0	0	0	4	0.966999	0	0	0	0	0	0	0	0	0	0	0	0	0	0	0	0	0	0	42	36.4647	2	1.03289	0	0	0	0	0	0	0	0	0
CARD_101066_TM_#03	efflux pump complex or subunit conferring antibiotic resistance; tet(J)	tetracycline	51	3000159	3000177	4	0	0	0	0	0	0	0	0	0	0	0	0	0	0	0	0	0	0	0	0	0	0	0	0	0	0	0	0	0	0	33	16.6684	0	0	0	0	0	0	0	0	0	0	0
NCBI_204550_TM_#01	efflux pump complex or subunit conferring antibiotic resistance; tet(K)	tetracycline	51	3000159	3000178	4	3	0.808393	0	0	0	0	0	0	0	0	3	1.91889	0	0	0	0	0	0	0	0	0	0	0	0	0	0	0	0	0	0	0	0	0	0	0	0	0	0	0	0	0	0	0
NCBI_204550_TM_#02	efflux pump complex or subunit conferring antibiotic resistance; tet(K)	tetracycline	51	3000159	3000178	4	61	1.62186	0	0	0	0	0	0	0	0	17	1.10801	6	0.450705	0	0	0	0	0	0	0	0	0	0	0	0	0	0	0	0	0	0	0	0	0	0	0	0	0	0	0	0	0
NCBI_204550_TM_#03	efflux pump complex or subunit conferring antibiotic resistance; tet(K)	tetracycline	51	3000159	3000178	4	14	3.339	0	0	0	0	0	0	0	0	1	0.365502	0	0	0	0	0	0	0	0	0	0	0	0	0	0	0	0	0	0	0	0	0	0	0	0	3	0.293405	0	0	0	0	1
RESF_302993_TM_#01	efflux pump complex or subunit conferring antibiotic resistance; tet(L)	tetracycline	51	3000159	3000179	4	339	5.63784	0	0	5	0.545968	3019	84.7259	24	1.05988	1092	43.0026	1517	68.6541	113	3.26284	11	0.371957	377	17.0352	581	187.152	0	0	616	24.176	0	0	1	0.0787343	1112	165.275	28	2.6885	1995	877.57	762	7.97149	55	1.78695	10	0.278429	526
NCBI_205359_TM_#01	efflux pump complex or subunit conferring antibiotic resistance; tet(L)	tetracycline	51	3000159	3000179	4	149	21.7458	0	0	6	5.38923	2027	548.707	11	4.49814	843	316.678	1127	490.606	69	18.5756	10	2.80318	274	115.404	420	1287.29	12	38.6695	721	250.125	0	0	0	0	1105	1450.05	46	38.0987	2289	9218.13	632	61.6834	79	26.0877	11	2.56131	313
NCBI_205359_TM_#02	efflux pump complex or subunit conferring antibiotic resistance; tet(L)	tetracycline	51	3000159	3000179	4	209	40.1203	0	0	7	7.79642	2678	973.777	8	3.6038	1143	540.738	1390	820.169	80	24.792	11	4.05941	319	193.426	463	1832.59	0	0	708	318.257	0	0	0	0	1442	2542.35	53	56.1846	2708	14178.4	796	111.154	108	45.6909	47	18.723	490
NCBI_205359_TM_#04	efflux pump complex or subunit conferring antibiotic resistance; tet(L)	tetracycline	51	3000159	3000179	4	171	33.7803	0	0	0	0	1951	674.742	3	1.35142	698	328.134	1255	715.215	79	29.5471	2	0.69519	207	113.666	357	1296.26	12	48.0042	187	79.3984	0	0	0	0	811	1394.56	39	38.7261	1753	9223.48	451	58.6792	54	27.2065	3	0.86619	330
NCBI_205359_TM_#05	efflux pump complex or subunit conferring antibiotic resistance; tet(L)	tetracycline	51	3000159	3000179	4	49	32.6719	0	0	0	0	1062	1048.11	14	26.1762	331	498.745	665	1123.91	65	71.5289	5	6.74743	138	228.197	264	3134.76	0	0	283	552.277	0	0	0	0	352	2006.44	7	23.062	605	9778.52	345	131.79	27	44.7169	0	0	257
NCBI_205359_TM_#09	efflux pump complex or subunit conferring antibiotic resistance; tet(L)	tetracycline	51	3000159	3000179	4	90	13.2751	0	0	9	8.08385	1550	429.778	5	4.12119	607	220.905	843	358.701	73	18.9996	5	2.21304	232	98.1385	324	1014.63	0	0	299	107.413	0	0	0	0	737	1056.85	39	34.4226	1305	5319.28	374	37.8818	46	14.8283	6	1.39708	259
RESF_303022_TM_#01	efflux pump complex or subunit conferring antibiotic resistance; tet(V)	tetracycline	51	3000159	3000181	4	4	0.0665002	25	8.12386	0	0	14	0.395743	19	0.801262	3	0.117762	1	0.0462488	0	0	0	0	56	2.51934	0	0	0	0	0	0	2	0.364168	1	0.0787343	0	0	2	0.194426	0	0	0	0	6	0.190184	0	0	0
CARD_100454_TM_#01	efflux pump complex or subunit conferring antibiotic resistance; tet(Y)	tetracycline	51	3000159	3000182	4	0	0	0	0	306896	61809	152	7.95665	0	0	60	4.44681	92	7.8265	0	0	0	0	0	0	1664	1007.2	126	92.4701	10716	788.779	0	0	6	0.792523	3689	1021.32	188	33.2549	0	0	0	0	0	0	0	0	0
CARD_100454_TM_#02	efflux pump complex or subunit conferring antibiotic resistance; tet(Y)	tetracycline	51	3000159	3000182	4	0	0	0	0	69021	91138.4	44	17.4699	0	0	4	1.70568	13	13.9943	0	0	0	0	0	0	247	983.402	28	121.677	2039	975.618	0	0	2	1.6731	664	1135.95	42	49.528	0	0	0	0	0	0	41	18.1058	0
CARD_100454_TM_#03	efflux pump complex or subunit conferring antibiotic resistance; tet(Y)	tetracycline	51	3000159	3000182	4	0	0	0	0	39373	126512	52	46.4155	0	0	0	0	24	28.4727	0	0	0	0	0	0	217	2441.04	0	0	1137	1199.03	0	0	0	0	509	2178.23	17	62.4237	0	0	0	0	0	0	0	0	0
CARD_100454_TM_#04	efflux pump complex or subunit conferring antibiotic resistance; tet(Y)	tetracycline	51	3000159	3000182	4	0	0	0	0	75583	150973	50	31.0219	0	0	16	10.1167	26	46.1343	0	0	0	0	0	0	379	2359.28	5	29.3812	2775	2817.55	0	0	0	0	723	1779.78	47	193.195	0	0	0	0	0	0	23	9.76586	0
CARD_100454_TM_#05	efflux pump complex or subunit conferring antibiotic resistance; tet(Y)	tetracycline	51	3000159	3000182	4	0	0	0	0	103602	102716	47	11.8075	0	0	19	7.06367	32	12.9823	0	0	0	0	0	0	563	1708.93	0	0	3546	1265.31	0	0	0	0	1178	1651.77	51	47.7821	0	0	0	0	0	0	20	4.86504	0
NCBI_201884_TM_#02	efflux pump complex or subunit conferring antibiotic resistance; tet(Z)	tetracycline	51	3000159	3000183	4	0	0	0	0	0	0	55	1.74876	0	0	19	0.856426	1011	52.62	0	0	0	0	0	0	0	0	16	7.16677	0	0	0	0	0	0	45	7.72492	0	0	44	22.1284	0	0	0	0	0	0	2
CARD_102233_TM_#01	efflux pump complex or subunit conferring antibiotic resistance; tetA(46)	antibiotic molecule	1000003	3000159	3004032	4	0	0	0	0	0	0	0	0	0	0	1	0.0458927	0	0	0	0	0	0	0	0	0	0	0	0	0	0	0	0	0	0	0	0	0	0	0	0	0	0	0	0	0	0	2
CARD_102155_TM_#01	efflux pump complex or subunit conferring antibiotic resistance; tetA(58)	tetracycline	51	3000159	3003980	4	29	0.486372	8	2.72081	227	24.6847	50	1.39674	319	13.9872	123	4.90817	435	19.7251	11	0.320639	26	0.876634	69	3.13142	28	9.14081	1	0.39175	176	6.97789	124	22.1102	29	2.24605	122	18.2954	45	4.37182	140	61.996	801	8.38513	440	14.3578	33	0.921972	165
CARD_100477_TM_#06	efflux pump complex or subunit conferring antibiotic resistance; tetA(P)	tetracycline	51	3000159	3000180	4	0	0	23	197.693	0	0	72	47.1663	0	0	10	12.9753	1887	2269.69	2	1.06863	0	0	51	55.824	0	0	0	0	0	0	2	6.71395	0	0	80	258.026	0	0	1	8.13806	0	0	0	0	0	0	10
CARD_100477_TM_#10	efflux pump complex or subunit conferring antibiotic resistance; tetA(P)	tetracycline	51	3000159	3000180	4	0	0	3	13.0089	0	0	37	16.7195	0	0	3	1.84658	788	566.247	0	0	0	0	19	11.6292	3	12.6154	7	34.9637	0	0	3398	8507.93	0	0	28	65.6424	0	0	0	0	2	0.273845	0	0	0	0	47
CARD_100477_TM_#19	efflux pump complex or subunit conferring antibiotic resistance; tetA(P)	tetracycline	51	3000159	3000180	4	0	0	33	102.325	0	0	64	17.736	0	0	5	1.82751	1286	635.99	1	0.267158	0	0	26	13.5559	0	0	0	0	0	0	7107	13137.3	14	10.0386	59	84.448	0	0	0	0	4	0.391206	0	0	0	0	64
CARD_102179_TM_#01	efflux pump complex or subunit conferring antibiotic resistance; tetB(58)	tetracycline	51	3000159	3003981	4	54	1.02641	0	0	42	5.11837	7	0.221932	132	6.5112	11	0.498118	137	7.0191	7	0.229798	31	1.18797	75	3.84959	5	1.86068	0	0	186	8.31582	7	1.43814	9	0.799536	55	9.33721	15	1.58962	16	7.94709	93	1.11166	68	2.50125	6	0.191635	50
CARD_102078_TM_#01	efflux pump complex or subunit conferring antibiotic resistance; tetU	tetracycline	51	3000159	3004650	4	0	0	0	0	0	0	0	0	0	0	74	10.8835	1485	271.56	0	0	0	0	0	0	0	0	0	0	0	0	0	0	0	0	0	0	0	0	2	3.07926	111	4.33925	0	0	0	0	0
CARD_100779_TM_#01	efflux pump complex or subunit conferring antibiotic resistance; TolC	antibiotic molecule	1000003	3000159	3000237	4	1105	18.0168	0	0	1100	117.789	4203	117.287	8498	368.2	53414	2104.29	89523	4079.72	3728	106.704	7182	241.048	13042	586.369	1655	526.646	80	30.8144	3405	132.616	6574	1160.27	15032	1143.97	383	57.3521	1223	115.285	1399	611.185	809208	8571.21	3025	97.9688	7519	208.365	265927
CARD_101977_TM_#01	efflux pump complex or subunit conferring antibiotic resistance; TriA	antibiotic molecule	1000003	3000159	3003679	4	910	14.7445	0	0	115	11.946	342	9.4868	165	7.04639	341	13.142	30	1.31374	212	6.01464	311	10.1077	16	0.703671	7	2.24949	85	31.7544	248	9.48332	14	2.54846	16	1.19044	228	32.5606	23	2.12108	18	8.04056	11717	124.334	404	12.7684	867	23.399	179
CARD_101978_TM_#01	efflux pump complex or subunit conferring antibiotic resistance; TriB	antibiotic molecule	1000003	3000159	3003680	4	0	0	0	0	0	0	0	0	0	0	0	0	0	0	0	0	0	0	0	0	0	0	0	0	0	0	28	4.82063	0	0	0	0	0	0	0	0	6317	66.9965	0	0	24	0.651316	0
CARD_101979_TM_#01	efflux pump complex or subunit conferring antibiotic resistance; TriC	antibiotic molecule	1000003	3000159	3003681	4	201	3.22465	0	0	85	9.01117	34	0.917174	72	3.03687	17	0.65206	60	2.63272	176	4.98209	427	13.8449	4	0.172536	0	0	1	0.39175	56	2.14694	0	0	0	0	291	42.8685	120	11.2372	4	1.67756	13103	138.749	2053	66.9065	416	11.5395	579
CARD_102660_TM_#01	efflux pump complex or subunit conferring antibiotic resistance; YajC	antibiotic molecule	1000003	3000159	3005040	4	173	9.51997	0	0	51	18.2398	33	2.984	391	62.2001	45	6.26312	916	147.23	102	10.3125	755	87.1709	18	2.49345	0	0	16	20.067	18	2.75089	2	1.38601	0	0	84	45.0007	1703	591.678	93	149.119	11896	456.215	1609	190.668	956	94.2014	2492
CARD_101721_TM_#01	efflux pump complex or subunit conferring antibiotic resistance; ykkC	antibiotic molecule	1000003	3000159	3003063	4	0	0	8	10.3553	0	0	2	0.1777	0	0	0	0	0	0	0	0	0	0	0	0	0	0	0	0	0	0	0	0	0	0	0	0	0	0	0	0	0	0	0	0	0	0	0
CARD_100327_TM_#01	efflux pump complex or subunit conferring antibiotic resistance; ykkD	antibiotic molecule	1000003	3000159	3003064	4	0	0	2	2.89086	0	0	0	0	0	0	2	0.313288	0	0	0	0	0	0	0	0	0	0	0	0	0	0	0	0	0	0	0	0	0	0	0	0	0	0	0	0	0	0	0
CARD_102134_TM_#01	efflux pump complex or subunit conferring antibiotic resistance; YojI	microcin J25	3003951	3000159	3003952	4	78	1.27666	10	3.40102	169	18.1615	1015	28.7391	9469	415.075	49898	1977.89	105906	4831.39	964	27.9916	6389	215.207	86	3.79197	178	58.0864	3	1.17525	243	9.42064	138	25.1219	6996	545.131	344	51.6759	204	19.5831	1695	752.441	831887	8826.07	5621	183.708	15235	426.679	291106
CARD_102393_TM_#01	gene altering cell wall charge; almG	peptide antibiotic	3000053	3003580	3004364	4	0	0	0	0	0	0	0	0	0	0	0	0	0	0	0	0	0	0	0	0	0	0	0	0	0	0	0	0	0	0	0	0	0	0	0	0	23550	278.532	0	0	0	0	89671
CARD_101546_TM_#01	gene altering cell wall charge; arnA	peptide antibiotic	3000053	3003580	3002985	5	2167	34.7333	0	0	46	4.78087	602	16.3567	235	9.90346	574	21.7991	52	2.27033	993	27.9121	514	16.694	542	23.64	2	0.616892	0	0	1063	40.6164	0	0	405	30.1581	61	8.74096	34	3.14038	8	3.46885	9574	101.452	450	14.1249	477	12.7792	16
CARD_102671_TM_#01	gene altering cell wall charge; ArnT	peptide antibiotic	3000053	3003580	3005053	5	2	0.050377	0	0	0	0	21	0.891357	2645	171.583	2096	122.472	1478	99.7996	77	3.32674	233	11.5082	0	0	0	0	0	0	0	0	77	20.7045	5843	668.09	21	4.69045	25	3.55696	588	385.014	43586	683.498	446	21.4616	38	1.55669	11649
[truncated: 137 more rows]
[truncated: 5 more columns]

## Sheet: Sheet1
Classification	Confers Resistance To	Normalized Abundance in RPKM (2021-Akita_L001 (paired, trimmed pairs))	Normalized Abundance in RPKM (2021-Hiroshima_L001 (paired, trimmed pairs))	Normalized Abundance in RPKM (2021-Hokkaido_L001 (paired, trimmed pairs))	Normalized Abundance in RPKM (2021-Kagoshima_L001 (paired, trimmed pairs))	Normalized Abundance in RPKM (2021-Miyagi_L001 (paired, trimmed pairs))	Normalized Abundance in RPKM (2021-Nagasaki_L001 (paired, trimmed pairs))	Normalized Abundance in RPKM (2021-Okinawa_L001 (paired, trimmed pairs))	Normalized Abundance in RPKM (2021-Saitama_L001 (paired, trimmed pairs))	Normalized Abundance in RPKM (2021-Shiga_L001 (paired, trimmed pairs))	Normalized Abundance in RPKM (2021-Tokushima_L001 (paired, trimmed pairs))	Normalized Abundance in RPKM (2021-Tottori_L001 (paired, trimmed pairs))	Normalized Abundance in RPKM (2021-Wakayama_L001 (paired, trimmed pairs))	Normalized Abundance in RPKM (2022-Akita_L001 (paired, trimmed pairs))	Normalized Abundance in RPKM (2022-Hiroshima_L001 (paired, trimmed pairs))	Normalized Abundance in RPKM (2022-Hokkaido_L001 (paired, trimmed pairs))	Normalized Abundance in RPKM (2022-Kagoshima_L001 (paired, trimmed pairs))	Normalized Abundance in RPKM (2022-Miyagi_L001 (paired, trimmed pairs))	Normalized Abundance in RPKM (2022-Nagasaki_L001 (paired, trimmed pairs))	Normalized Abundance in RPKM (2022-Okinawa_L001 (paired, trimmed pairs))	Normalized Abundance in RPKM (2022-Saitama_L001 (paired, trimmed pairs))	Normalized Abundance in RPKM (2022-Shiga_L001 (paired, trimmed pairs))	Normalized Abundance in RPKM (2022-Tokushima_L001 (paired, trimmed pairs))	Normalized Abundance in RPKM (2022-Tottori_L001 (paired, trimmed pairs))	Normalized Abundance in RPKM (2022-Wakayama_L001 (paired, trimmed pairs))
[truncated: 1,406 more rows]
